# Supplementary material for: Antimicrobial Non-Susceptibility of Escherichia coli from Outpatients and Patients Visiting Emergency Rooms in Taiwan
Source: PubMed Central journal article supplement (PMC4669119; doi:10.1371/journal.pone.0144103), 2015-12-03
Supplement: pone.0144103.s001.pdf [file pone.0144103.s001.pdf]

S1. Dataset of 3481 *Escherichia coli* isolates from outpatients and patients visiting emergency rooms in Taiwan, 2002 - 2012.

| TSAR | Specimen#    | Specimen | Age | AMK_M | AMP_M | ATM_M | AUG_M | CAZ_M | CFZ_M | CIP_M  |
|------|--------------|----------|-----|-------|-------|-------|-------|-------|-------|--------|
| III  | 2002-S01-006 | Blood    | 80  | <=2   | 2     | <=0.5 | 4     | <=0.5 | <=2   | <=0.03 |
| III  | 2002-S01-008 | Blood    | 75  | >32   | >16   | >16   | 8     | >16   | >16   | >2     |
| III  | 2002-S01-011 | Urine    | 70  | <=2   | >16   | 8     | >16   | 16    | >16   | <=0.03 |
| III  | 2002-S01-020 | Urine    | 46  | 4     | >16   | <=0.5 | 8     | <=0.5 | <=2   | 0.5    |
| III  | 2002-S01-022 | Other    | 29  | <=2   | 4     | <=0.5 | 4     | <=0.5 | <=2   | <=0.03 |
| III  | 2002-S01-032 | Urine    | 67  | <=2   | >16   | <=0.5 | 16    | <=0.5 | >16   | <=0.03 |
| III  | 2002-S01-038 | Urine    | 67  | <=2   | >16   | <=0.5 | 8     | <=0.5 | <=2   | 0.12   |
| III  | 2002-S01-040 | Urine    | 47  | 4     | 8     | <=0.5 | 8     | <=0.5 | <=2   | <=0.03 |
| III  | 2002-S01-042 | Urine    | 72  | <=2   | >16   | <=0.5 | 8     | <=0.5 | 4     | <=0.03 |
| III  | 2002-S01-048 | Urine    | 63  | <=2   | 4     | <=0.5 | 8     | <=0.5 | <=2   | <=0.03 |
| III  | 2002-S01-049 | Urine    | 55  | <=2   | >16   | <=0.5 | 8     | <=0.5 | 4     | >2     |
| III  | 2002-S01-050 | Urine    | 51  | 4     | <=1   | <=0.5 | 4     | <=0.5 | <=2   | <=0.03 |
| III  | 2002-C01-009 | Urine    | 35  | <=2   | >16   | <=0.5 | 8     | <=0.5 | <=2   | <=0.03 |
| III  | 2002-C01-011 | Urine    | 21  | <=2   | >16   | <=0.5 | 8     | <=0.5 | <=2   | 0.12   |
| III  | 2002-C01-020 | Urine    | 19  | <=2   | >16   | <=0.5 | 4     | <=0.5 | <=2   | 1      |
| III  | 2002-C01-027 | Other    | 32  | <=2   | >16   | <=0.5 | 16    | <=0.5 | 16    | <=0.03 |
| III  | 2002-C01-028 | Urine    | 64  | 8     | >16   | <=0.5 | 8     | <=0.5 | 4     | >2     |
| III  | 2002-C01-029 | Urine    | 75  | <=2   | >16   | <=0.5 | 8     | <=0.5 | 8     | 0.12   |
| III  | 2002-C01-032 | Urine    | 66  | 16    | >16   | <=0.5 | 16    | <=0.5 | >16   | 0.5    |
| III  | 2002-C01-035 | Urine    | 68  | <=2   | >16   | <=0.5 | 8     | <=0.5 | <=2   | 0.5    |
| III  | 2002-C01-037 | Urine    | 75  | <=2   | >16   | <=0.5 | 8     | <=0.5 | <=2   | <=0.03 |
| III  | 2002-C01-038 | Urine    | 73  | <=2   | 2     | <=0.5 | 4     | <=0.5 | 4     | <=0.03 |
| III  | 2002-C01-039 | Urine    | 16  | <=2   | 8     | <=0.5 | 8     | <=0.5 | 4     | <=0.03 |
| III  | 2002-C01-040 | Urine    | 2   | 4     | >16   | <=0.5 | 8     | <=0.5 | <=2   | <=0.03 |
| III  | 2002-C01-042 | Urine    | 77  | <=2   | >16   | 16    | >16   | 16    | >16   | <=0.03 |
| III  | 2002-C01-043 | Urine    | 57  | <=2   | 4     | <=0.5 | 4     | <=0.5 | <=2   | <=0.03 |
| III  | 2002-C02-001 | Urine    | 58  | <=2   | >16   | <=0.5 | 8     | <=0.5 | 4     | <=0.03 |
| III  | 2002-C02-005 | Urine    | 0   | 4     | >16   | <=0.5 | 8     | <=0.5 | 4     | <=0.03 |
| III  | 2002-C02-006 | Urine    | 44  | <=2   | 4     | <=0.5 | 4     | <=0.5 | <=2   | <=0.03 |
| III  | 2002-C02-008 | Urine    | 60  | <=2   | >16   | <=0.5 | 8     | <=0.5 | 4     | 1      |
| III  | 2002-C02-030 | Other    | 39  | <=2   | >16   | <=0.5 | 8     | <=0.5 | <=2   | <=0.03 |
| III  | 2002-C02-041 | Urine    | 64  | <=2   | 4     | <=0.5 | 4     | <=0.5 | <=2   | <=0.03 |
| III  | 2002-C02-042 | Urine    | 70  | <=2   | 4     | <=0.5 | 8     | <=0.5 | 4     | <=0.03 |
| III  | 2002-C02-043 | Urine    | 48  | <=2   | >16   | <=0.5 | 8     | <=0.5 | <=2   | <=0.03 |
| III  | 2002-C02-048 | Urine    | 64  | <=2   | >16   | <=0.5 | 8     | <=0.5 | <=2   | <=0.03 |
| III  | 2002-C04-016 | Urine    | 60  | <=2   | >16   | <=0.5 | 16    | <=0.5 | <=2   | 0.12   |
| III  | 2002-C04-018 | Blood    | 85  | <=2   | >16   | <=0.5 | 8     | <=0.5 | <=2   | <=0.03 |
| III  | 2002-C04-028 | Other    | 59  | <=2   | >16   | <=0.5 | 8     | <=0.5 | 4     | <=0.03 |
| III  | 2002-C04-047 | Other    | 84  | <=2   | 8     | <=0.5 | 8     | 1     | <=2   | >2     |
| III  | 2002-C04-050 | Urine    | 37  | <=2   | 8     | <=0.5 | 8     | <=0.5 | <=2   | 0.25   |
| III  | 2002-C04-209 | Blood    | 88  | 4     | 2     | <=0.5 | 4     | <=0.5 | <=2   | <=0.03 |
| III  | 2002-C04-224 | Blood    | 67  | <=2   | 4     | <=0.5 | 8     | <=0.5 | <=2   | 0.25   |
| III  | 2002-C04-225 | Blood    | 89  | <=2   | >16   | <=0.5 | 8     | <=0.5 | <=2   | <=0.03 |
| III  | 2002-C04-242 | Urine    | 80  | 4     | >16   | >16   | >16   | 16    | >16   | >2     |
| III  | 2002-S05-004 | Urine    | 87  | <=2   | >16   | <=0.5 | 8     | <=0.5 | 4     | 0.12   |
| III  | 2002-S05-005 | Urine    | 56  | 8     | >16   | <=0.5 | 8     | <=0.5 | <=2   | 0.25   |
| III  | 2002-S05-006 | Urine    | 44  | <=2   | >16   | <=0.5 | 8     | <=0.5 | <=2   | 0.12   |
| III  | 2002-S05-007 | Urine    | 56  | <=2   | 8     | <=0.5 | 8     | <=0.5 | <=2   | <=0.03 |
| III  | 2002-S05-023 | Urine    | 79  | <=2   | 2     | <=0.5 | 2     | <=0.5 | <=2   | 1      |
| III  | 2002-S05-024 | Urine    | 47  | <=2   | 2     | <=0.5 | 2     | <=0.5 | <=2   | <=0.03 |
| III  | 2002-S05-031 | Other    | 40  | 4     | >16   | <=0.5 | 8     | <=0.5 | 4     | 0.5    |
| III  | 2002-S05-035 | Urine    | 60  | <=2   | >16   | <=0.5 | 4     | <=0.5 | <=2   | 0.12   |
| III  | 2002-S05-036 | Blood    | 66  | <=2   | 2     | <=0.5 | 4     | <=0.5 | <=2   | <=0.03 |
| III  | 2002-S05-039 | Urine    | 0   | <=2   | >16   | <=0.5 | 8     | <=0.5 | <=2   | 0.12   |
| III  | 2002-S05-045 | Urine    | 20  | <=2   | >16   | <=0.5 | 8     | <=0.5 | <=2   | 0.5    |

|     |              |       |         |     |     |       |     |       |     |        |
|-----|--------------|-------|---------|-----|-----|-------|-----|-------|-----|--------|
| III | 2002-S06-001 | Urine | 74      | 16  | >16 | >16   | >16 | >16   | >16 | >2     |
| III | 2002-S06-002 | Urine | 72      | <=2 | >16 | <=0.5 | 8   | <=0.5 | 4   | >2     |
| III | 2002-S06-003 | Urine | 42      | <=2 | >16 | <=0.5 | 8   | <=0.5 | 8   | 0.25   |
| III | 2002-S06-005 | Urine | 69      | 8   | >16 | <=0.5 | 8   | <=0.5 | 8   | <=0.03 |
| III | 2002-S06-009 | Urine | 46      | <=2 | >16 | <=0.5 | 8   | <=0.5 | <=2 | <=0.03 |
| III | 2002-S06-011 | Urine | 65      | 4   | >16 | <=0.5 | 8   | <=0.5 | 8   | <=0.03 |
| III | 2002-S06-014 | Urine | 70      | <=2 | >16 | <=0.5 | 8   | <=0.5 | <=2 | <=0.03 |
| III | 2002-S06-017 | Urine | 81      | 8   | >16 | <=0.5 | 8   | <=0.5 | 4   | >2     |
| III | 2002-S06-020 | Urine | 72      | <=2 | >16 | <=0.5 | 4   | <=0.5 | <=2 | 0.5    |
| III | 2002-S06-021 | Urine | 23      | <=2 | >16 | <=0.5 | 8   | <=0.5 | <=2 | >2     |
| III | 2002-S06-023 | Urine | 70      | 4   | >16 | <=0.5 | 16  | <=0.5 | 4   | >2     |
| III | 2002-S06-024 | Urine | 19      | 4   | >16 | <=0.5 | 8   | <=0.5 | <=2 | <=0.03 |
| III | 2002-S06-029 | Urine | 64      | <=2 | >16 | <=0.5 | 8   | <=0.5 | 4   | 1      |
| III | 2002-S06-030 | Urine | 0       | <=2 | 4   | <=0.5 | 4   | <=0.5 | <=2 | <=0.03 |
| III | 2002-S06-032 | Other | 24      | <=2 | >16 | <=0.5 | 8   | <=0.5 | <=2 | 0.25   |
| III | 2002-S06-034 | Other | 40      | <=2 | >16 | <=0.5 | 8   | <=0.5 | <=2 | 0.5    |
| III | 2002-S06-218 | Blood | 76      | <=2 | >16 | <=0.5 | 16  | <=0.5 | 8   | <=0.03 |
| III | 2002-S06-220 | Blood | 55      | <=2 | 4   | <=0.5 | 8   | <=0.5 | <=2 | <=0.03 |
| III | 2002-S07-001 | Urine | 60      | <=2 | >16 | <=0.5 | 16  | <=0.5 | <=2 | <=0.03 |
| III | 2002-S07-002 | Urine | 73      | 8   | 4   | <=0.5 | 4   | <=0.5 | <=2 | <=0.03 |
| III | 2002-S07-003 | Urine | 42      | <=2 | >16 | <=0.5 | 8   | <=0.5 | <=2 | 0.12   |
| III | 2002-S07-005 | Urine | 3       | <=2 | >16 | <=0.5 | 16  | <=0.5 | 8   | 0.12   |
| III | 2002-S07-009 | Urine | 82      | 4   | <=1 | <=0.5 | 2   | <=0.5 | <=2 | <=0.03 |
| III | 2002-S07-014 | Urine | 46      | <=2 | 4   | <=0.5 | 4   | <=0.5 | <=2 | <=0.03 |
| III | 2002-S07-015 | Urine | 46      | <=2 | 2   | <=0.5 | 1   | <=0.5 | <=2 | 0.5    |
| III | 2002-S07-019 | Urine | 74      | <=2 | 2   | <=0.5 | 2   | <=0.5 | <=2 | 0.12   |
| III | 2002-S07-021 | Blood | 44      | 4   | >16 | <=0.5 | 8   | <=0.5 | <=2 | >2     |
| III | 2002-S07-028 | Urine | 64      | 4   | >16 | <=0.5 | 8   | <=0.5 | <=2 | 0.5    |
| III | 2002-S07-029 | Urine | 0       | <=2 | >16 | 16    | >16 | >16   | >16 | 0.25   |
| III | 2002-S07-035 | Blood | 70      | <=2 | >16 | <=0.5 | 8   | <=0.5 | <=2 | 0.12   |
| III | 2002-S07-036 | Urine | 11      | 4   | 4   | <=0.5 | 4   | <=0.5 | <=2 | >2     |
| III | 2002-S07-040 | Urine | 69      | 4   | 4   | <=0.5 | 4   | <=0.5 | <=2 | <=0.03 |
| III | 2002-S07-043 | Other | 46      | <=2 | >16 | <=0.5 | 16  | <=0.5 | 4   | 0.5    |
| III | 2002-S07-045 | Urine | 24      | <=2 | >16 | <=0.5 | 8   | <=0.5 | <=2 | 0.06   |
| III | 2002-S07-046 | Urine | 75      | 8   | >16 | <=0.5 | 8   | <=0.5 | <=2 | <=0.03 |
| III | 2002-S07-048 | Urine | 25      | <=2 | >16 | <=0.5 | 8   | <=0.5 | <=2 | <=0.03 |
| III | 2002-S07-050 | Urine | 24      | <=2 | 4   | <=0.5 | 4   | <=0.5 | <=2 | <=0.03 |
| III | 2002-S07-204 | Blood | 69      | <=2 | 4   | <=0.5 | 8   | <=0.5 | <=2 | <=0.03 |
| III | 2002-S07-218 | Blood | 60      | <=2 | >16 | <=0.5 | 8   | <=0.5 | 8   | <=0.03 |
| III | 2002-S07-220 | Blood | 78      | <=2 | >16 | <=0.5 | 8   | <=0.5 | <=2 | <=0.03 |
| III | 2002-N05-003 | Urine | unk     | <=2 | 8   | <=0.5 | 4   | <=0.5 | <=2 | 0.5    |
| III | 2002-N05-005 | Urine |         | <=2 | >16 | <=0.5 | 8   | <=0.5 | <=2 | 0.25   |
| III | 2002-N05-006 | Urine |         | <=2 | >16 | <=0.5 | 8   | <=0.5 | <=2 | 0.12   |
| III | 2002-N05-007 | Urine |         | <=2 | >16 | <=0.5 | 8   | <=0.5 | <=2 | <=0.03 |
| III | 2002-N05-009 | Urine |         | <=2 | >16 | <=0.5 | 16  | <=0.5 | 4   | <=0.03 |
| III | 2002-N05-012 | Urine |         | <=2 | 4   | <=0.5 | 4   | <=0.5 | <=2 | <=0.03 |
| III | 2002-N05-013 | Urine |         | <=2 | 4   | <=0.5 | 4   | <=0.5 | <=2 | <=0.03 |
| III | 2002-N05-014 | Urine |         | <=2 | 2   | <=0.5 | 2   | <=0.5 | <=2 | <=0.03 |
| III | 2002-N05-016 | Urine |         | 4   | >16 | <=0.5 | 16  | <=0.5 | 8   | <=0.03 |
| III | 2002-N05-017 | Urine | unk     | <=2 | >16 | 2     | 16  | <=0.5 | >16 | >2     |
| III | 2002-N05-021 | Urine |         | <=2 | >16 | <=0.5 | 8   | <=0.5 | <=2 | 0.12   |
| III | 2002-N05-024 | Urine |         | <=2 | <=1 | <=0.5 | 1   | <=0.5 | <=2 | 0.5    |
| III | 2002-N05-028 | Urine |         | <=2 | >16 | <=0.5 | 8   | <=0.5 | 4   | <=0.03 |
| III | 2002-N05-032 | Urine |         | <=2 | 4   | <=0.5 | 8   | <=0.5 | <=2 | 0.12   |
| III | 2002-N05-036 | Urine |         | <=2 | >16 | <=0.5 | 8   | <=0.5 | 4   | 0.5    |
| III | 2002-N05-037 | Urine |         | <=2 | >16 | <=0.5 | 8   | <=0.5 | <=2 | <=0.03 |
| III | 2002-N05-044 | Urine |         | <=2 | 2   | <=0.5 | 4   | <=0.5 | <=2 | <=0.03 |
| III | 2002-N05-208 | Blood |         | <=2 | 4   | <=0.5 | 8   | <=0.5 | <=2 | <=0.03 |
| III | 2002-N06-009 | Urine | 47      | <=2 | >16 | <=0.5 | 8   | <=0.5 | 8   | >2     |
| III | 2002-N06-020 | Urine | 51(89?) | <=2 | >16 | 8     | >16 | >16   | >16 | <=0.03 |
| III | 2002-N06-033 | Urine | 7       | 4   | 4   | <=0.5 | 4   | <=0.5 | <=2 | 0.25   |

|     |              |       |     |     |     |       |     |       |     |        |
|-----|--------------|-------|-----|-----|-----|-------|-----|-------|-----|--------|
| III | 2002-N06-039 | Other | 1   | <=2 | >16 | <=0.5 | 8   | <=0.5 | <=2 | <=0.03 |
| III | 2002-N06-041 | Blood | 68  | <=2 | >16 | <=0.5 | 8   | <=0.5 | <=2 | 0.25   |
| III | 2002-N06-042 | Blood | 78  | 4   | >16 | <=0.5 | 8   | <=0.5 | 4   | 0.25   |
| III | 2002-N06-043 | Blood | 82  | 4   | >16 | <=0.5 | 8   | <=0.5 | <=2 | >2     |
| III | 2002-N06-258 | Blood | 54  | <=2 | 4   | <=0.5 | 4   | <=0.5 | <=2 | <=0.03 |
| III | 2002-N06-269 | Blood | 79  | >32 | >16 | 16    | 16  | 4     | >16 | 0.25   |
| III | 2002-N07-002 | Urine | 65  | 4   | >16 | 2     | 16  | 1     | >16 | 0.06   |
| III | 2002-N07-004 | Urine | 64  | <=2 | >16 | <=0.5 | 8   | <=0.5 | <=2 | 0.25   |
| III | 2002-N07-009 | Urine | 88  | >32 | >16 | >16   | >16 | >16   | >16 | >2     |
| III | 2002-N07-010 | Urine | 73  | >32 | >16 | 16    | >16 | >16   | >16 | >2     |
| III | 2002-N07-021 | Urine | 4   | <=2 | >16 | <=0.5 | 8   | <=0.5 | 4   | <=0.03 |
| III | 2002-N07-025 | Urine | 29  | <=2 | >16 | <=0.5 | 8   | <=0.5 | 4   | 0.12   |
| III | 2002-N07-032 | Urine | 76  | <=2 | >16 | <=0.5 | >16 | <=0.5 | 16  | >2     |
| III | 2002-N07-033 | Urine | 34  | 4   | >16 | <=0.5 | 16  | <=0.5 | 8   | >2     |
| III | 2002-N07-042 | Urine | 41  | <=2 | 4   | <=0.5 | 8   | <=0.5 | <=2 | 0.06   |
| III | 2002-N07-044 | Blood | 77  | 8   | 4   | <=0.5 | 4   | <=0.5 | <=2 | <=0.03 |
| III | 2002-N07-045 | Blood | 73  | <=2 | >16 | <=0.5 | 8   | <=0.5 | 4   | 2      |
| III | 2002-N07-047 | Blood | 47  | 4   | >16 | <=0.5 | 8   | <=0.5 | <=2 | <=0.03 |
| III | 2002-N07-048 | Blood | 76  | <=2 | >16 | <=0.5 | 16  | <=0.5 | 4   | 0.25   |
| III | 2002-N07-202 | Blood | 62  | 8   | 2   | <=0.5 | 2   | <=0.5 | <=2 | <=0.03 |
| III | 2002-S08-008 | Other | 34  | <=2 | 2   | <=0.5 | 4   | <=0.5 | <=2 | <=0.03 |
| III | 2002-S08-010 | Urine | unk | <=2 | >16 | <=0.5 | 8   | <=0.5 | <=2 | 0.25   |
| III | 2002-S08-016 | Urine | 69  | <=2 | >16 | <=0.5 | 8   | <=0.5 | <=2 | <=0.03 |
| III | 2002-S08-017 | Urine | 39  | >32 | >16 | 8     | 16  | 2     | >16 | >2     |
| III | 2002-S08-020 | Other | 1   | <=2 | >16 | <=0.5 | 8   | <=0.5 | <=2 | <=0.03 |
| III | 2002-S08-029 | Blood | 82  | <=2 | >16 | <=0.5 | 16  | <=0.5 | 16  | <=0.03 |
| III | 2002-S08-030 | Urine |     | 4   | >16 | <=0.5 | 8   | <=0.5 | <=2 | <=0.03 |
| III | 2002-S08-031 | Urine | 79  | <=2 | >16 | <=0.5 | 8   | <=0.5 | 4   | <=0.03 |
| III | 2002-S08-032 | Urine | 47  | <=2 | >16 | <=0.5 | 8   | <=0.5 | <=2 | 0.12   |
| III | 2002-S08-033 | Urine | unk | <=2 | >16 | <=0.5 | >16 | <=0.5 | >16 | >2     |
| III | 2002-S08-038 | Urine |     | <=2 | >16 | <=0.5 | >16 | <=0.5 | >16 | >2     |
| III | 2002-S08-041 | Urine | 59  | 4   | >16 | <=0.5 | 4   | <=0.5 | 16  | >2     |
| III | 2002-E02-002 | Urine | 50  | <=2 | >16 | 4     | >16 | 8     | >16 | >2     |
| III | 2002-E02-009 | Urine | 80  | <=2 | <=1 | <=0.5 | 1   | <=0.5 | <=2 | 0.06   |
| III | 2002-E02-010 | Urine | 90  | <=2 | 4   | <=0.5 | 4   | <=0.5 | <=2 | <=0.03 |
| III | 2002-E02-012 | Urine | 36  | <=2 | >16 | <=0.5 | 8   | <=0.5 | <=2 | <=0.03 |
| III | 2002-E02-015 | Urine | 29  | <=2 | 4   | <=0.5 | 4   | <=0.5 | <=2 | <=0.03 |
| III | 2002-E02-019 | Urine | 52  | <=2 | 4   | <=0.5 | 4   | <=0.5 | <=2 | <=0.03 |
| III | 2002-E02-022 | Other | 32  | <=2 | >16 | <=0.5 | 8   | <=0.5 | 4   | <=0.03 |
| III | 2002-E02-027 | Urine | 58  | <=2 | >16 | <=0.5 | 16  | <=0.5 | 8   | <=0.03 |
| III | 2002-E02-035 | Urine | 77  | <=2 | 4   | <=0.5 | 4   | <=0.5 | <=2 | <=0.03 |
| III | 2002-E02-036 | Urine | 60  | <=2 | >16 | <=0.5 | 8   | <=0.5 | <=2 | 0.12   |
| III | 2002-E02-041 | Urine | 21  | <=2 | 2   | <=0.5 | 4   | <=0.5 | <=2 | <=0.03 |
| III | 2002-E02-042 | Urine | 38  | <=2 | >16 | <=0.5 | >16 | <=0.5 | <=2 | <=0.03 |
| III | 2002-E02-043 | Other | 51  | <=2 | 16  | <=0.5 | 16  | <=0.5 | <=2 | <=0.03 |
| III | 2002-E02-049 | Urine | 85  | 4   | >16 | <=0.5 | 8   | <=0.5 | 4   | <=0.03 |
| III | 2002-E02-203 | Blood | 59  | <=2 | >16 | <=0.5 | 8   | <=0.5 | 4   | <=0.03 |
| III | 2002-E02-214 | Blood | 59  | <=2 | >16 | <=0.5 | 8   | <=0.5 | 4   | <=0.03 |
| III | 2002-E02-218 | Blood | 46  | <=2 | >16 | <=0.5 | 8   | <=0.5 | 4   | <=0.03 |
| III | 2002-N08-004 | Urine | 24  | <=2 | <=1 | <=0.5 | 1   | <=0.5 | <=2 | <=0.03 |
| III | 2002-N08-005 | Urine | 24  | <=2 | >16 | <=0.5 | 8   | <=0.5 | 4   | <=0.03 |
| III | 2002-N08-006 | Urine | 58  | 4   | >16 | 2     | 8   | <=0.5 | >16 | 0.25   |
| III | 2002-N08-008 | Urine | 38  | 4   | >16 | <=0.5 | 16  | <=0.5 | 4   | >2     |
| III | 2002-N08-009 | Urine | 59  | <=2 | >16 | 2     | >16 | 1     | >16 | <=0.03 |
| III | 2002-N08-020 | Urine | 39  | <=2 | 4   | 1     | 4   | <=0.5 | <=2 | <=0.03 |
| III | 2002-N08-022 | Urine | 46  | <=2 | >16 | <=0.5 | 8   | <=0.5 | 4   | <=0.03 |
| III | 2002-N08-023 | Urine | 48  | <=2 | 2   | <=0.5 | 4   | <=0.5 | 4   | 0.5    |
| III | 2002-N08-024 | Blood | 69  | <=2 | >16 | <=0.5 | 8   | <=0.5 | <=2 | <=0.03 |
| III | 2002-N08-025 | Urine | 30  | <=2 | >16 | <=0.5 | 8   | <=0.5 | <=2 | >2     |
| III | 2002-N08-029 | Urine | 21  | <=2 | >16 | <=0.5 | 8   | <=0.5 | <=2 | <=0.03 |
| III | 2002-N08-034 | Urine | 79  | >32 | >16 | 4     | 16  | 1     | >16 | 0.25   |

|     |              |       |        |     |     |       |       |       |     |        |
|-----|--------------|-------|--------|-----|-----|-------|-------|-------|-----|--------|
| III | 2002-N08-035 | Urine | 41     | <=2 | 4   | <=0.5 | 4     | <=0.5 | <=2 | 0.12   |
| III | 2002-N08-037 | Other | 22     | <=2 | 4   | <=0.5 | 4     | <=0.5 | <=2 | <=0.03 |
| III | 2002-N08-181 | Other | 1      | 4   | >16 | <=0.5 | 8     | <=0.5 | 4   | <=0.03 |
| III | 2002-N08-193 | Urine | 0      | <=2 | 4   | <=0.5 | 4     | <=0.5 | <=2 | <=0.03 |
| III | 2002-N08-207 | Blood | 63     | <=2 | <=1 | <=0.5 | 1     | <=0.5 | <=2 | 0.25   |
| III | 2002-N08-210 | Blood | 56     | 4   | >16 | <=0.5 | 8     | 1     | 4   | 0.12   |
| III | 2002-S09-001 | Blood | 62     | <=2 | 8   | <=0.5 | 8     | <=0.5 | <=2 | 0.12   |
| III | 2002-S09-002 | Blood | 37     | <=2 | >16 | <=0.5 | 8     | <=0.5 | 4   | <=0.03 |
| III | 2002-S09-003 | Urine | 19     | <=2 | 4   | <=0.5 | 8     | <=0.5 | <=2 | >2     |
| III | 2002-S09-006 | Urine | 69     | <=2 | >16 | <=0.5 | 8     | <=0.5 | 4   | >2     |
| III | 2002-S09-013 | Blood | 81     | <=2 | >16 | <=0.5 | 4     | <=0.5 | <=2 | <=0.03 |
| III | 2002-S09-014 | Urine | 67     | <=2 | >16 | <=0.5 | 8     | <=0.5 | <=2 | 0.12   |
| III | 2002-S09-016 | Urine | 47     | <=2 | 4   | <=0.5 | 4     | <=0.5 | <=2 | 0.25   |
| III | 2002-S09-019 | Blood | 54     | <=2 | 2   | <=0.5 | 4     | <=0.5 | <=2 | 0.12   |
| III | 2002-S09-021 | Urine | 87     | 4   | >16 | <=0.5 | 4     | <=0.5 | <=2 | >2     |
| III | 2002-S09-023 | Urine | 82     | 4   | 4   | <=0.5 | 4     | <=0.5 | <=2 | >2     |
| III | 2002-S09-024 | Urine | 4      | 4   | 4   | <=0.5 | 2     | <=0.5 | <=2 | <=0.03 |
| III | 2002-S09-026 | Urine | 23     | 4   | >16 | <=0.5 | 8     | <=0.5 | <=2 | 0.12   |
| III | 2002-S09-033 | Blood | 67     | 4   | >16 | <=0.5 | 16    | <=0.5 | 4   | <=0.03 |
| III | 2002-S09-034 | Blood | 70     | <=2 | >16 | <=0.5 | 8     | <=0.5 | <=2 | 0.06   |
| III | 2002-S09-037 | Urine | 89     | 4   | >16 | <=0.5 | 8     | <=0.5 | <=2 | <=0.03 |
| III | 2002-S09-041 | Blood | 48     | <=2 | >16 | 8     | >16   | >16   | >16 | >2     |
| III | 2002-S09-043 | Urine | 23     | <=2 | >16 | <=0.5 | 8     | <=0.5 | <=2 | 0.25   |
| III | 2002-S09-045 | Urine | 77     | 4   | >16 | <=0.5 | 8     | <=0.5 | 4   | <=0.03 |
| III | 2002-S09-050 | Other | 65     | <=2 | >16 | <=0.5 | 8     | <=0.5 | <=2 | 0.12   |
| III | 2002-S09-201 | Blood | 71     | 4   | >16 | <=0.5 | 16    | <=0.5 | 4   | >2     |
| III | 2002-S09-206 | Blood | 76     | <=2 | <=1 | <=0.5 | <=0.5 | <=0.5 | <=2 | <=0.03 |
| III | 2002-S09-211 | Blood | 57     | 8   | >16 | 4     | >16   | 16    | >16 | 0.12   |
| III | 2002-S09-217 | Blood | 57     | 8   | 4   | <=0.5 | 4     | 1     | 4   | <=0.03 |
| III | 2002-S09-220 | Blood | 81     | <=2 | 4   | <=0.5 | 4     | <=0.5 | <=2 | <=0.03 |
| III | 2002-E03-016 | Other | 62     | <=2 | >16 | <=0.5 | 8     | <=0.5 | <=2 | >2     |
| III | 2002-E03-039 | Urine | 78     | <=2 | >16 | <=0.5 | 8     | <=0.5 | 8   | >2     |
| III | 2002-E03-042 | Other | 78     | 8   | >16 | <=0.5 | 8     | <=0.5 | 4   | 0.12   |
| III | 2002-C06-007 | Urine | 0      | <=2 | 4   | <=0.5 | 4     | <=0.5 | <=2 | <=0.03 |
| III | 2002-C06-008 | Urine | 21     | <=2 | >16 | <=0.5 | 8     | <=0.5 | 4   | >2     |
| III | 2002-C06-021 | Other | 24     | <=2 | >16 | <=0.5 | 4     | <=0.5 | <=2 | <=0.03 |
| III | 2002-C06-022 | Urine | 18     | 4   | >16 | <=0.5 | 8     | <=0.5 | <=2 | <=0.03 |
| III | 2002-C06-026 | Blood | 3(13?) | 4   | >16 | <=0.5 | 8     | <=0.5 | <=2 | 0.25   |
| III | 2002-C06-028 | Blood | 82     | <=2 | >16 | <=0.5 | 8     | <=0.5 | <=2 | <=0.03 |
| III | 2002-C06-029 | Blood | 70     | 4   | >16 | 8     | >16   | >16   | >16 | >2     |
| III | 2002-C06-035 | Urine | 92     | <=2 | >16 | <=0.5 | 8     | <=0.5 | 4   | <=0.03 |
| III | 2002-C06-039 | Urine | 82     | <=2 | >16 | <=0.5 | 8     | <=0.5 | <=2 | <=0.03 |
| III | 2002-C06-040 | Blood | 71     | <=2 | >16 | <=0.5 | 8     | <=0.5 | 4   | 0.25   |
| III | 2002-C06-042 | Blood | 92     | <=2 | >16 | 4     | >16   | 8     | >16 | 0.25   |
| III | 2002-C06-043 | Other | 50     | 4   | >16 | <=0.5 | 16    | <=0.5 | >16 | >2     |
| III | 2002-C06-047 | Urine | 78     | <=2 | >16 | <=0.5 | 8     | <=0.5 | <=2 | 0.12   |
| III | 2002-C07-003 | Blood | 35     | <=2 | 4   | <=0.5 | 4     | <=0.5 | <=2 | <=0.03 |
| III | 2002-C07-008 | Other | 46     | <=2 | >16 | <=0.5 | 8     | <=0.5 | <=2 | 0.25   |
| III | 2002-C07-010 | Urine | 50     | 4   | >16 | <=0.5 | 8     | <=0.5 | <=2 | 0.12   |
| III | 2002-C07-011 | Urine | 81     | <=2 | >16 | <=0.5 | 8     | <=0.5 | 4   | 0.12   |
| III | 2002-C07-012 | Blood | 48     | >32 | >16 | 8     | >16   | 2     | >16 | 0.25   |
| III | 2002-N16-003 | Blood |        | <=2 | >16 | <=0.5 | 16    | <=0.5 | 4   | <=0.03 |
| III | 2002-N16-004 | Urine | 72     | <=2 | >16 | <=0.5 | 8     | <=0.5 | 4   | >2     |
| III | 2002-N16-023 | Urine | 83     | <=2 | >16 | <=0.5 | 16    | <=0.5 | 4   | <=0.03 |
| III | 2002-N16-024 | Urine | 0      | <=2 | >16 | <=0.5 | 16    | <=0.5 | 8   | >2     |
| III | 2002-N16-034 | Urine | 69     | <=2 | 2   | <=0.5 | 4     | <=0.5 | <=2 | <=0.03 |
| III | 2002-N16-035 | Urine | 0      | <=2 | >16 | <=0.5 | 16    | <=0.5 | 16  | <=0.03 |
| III | 2002-N16-041 | Urine |        | <=2 | >16 | <=0.5 | 8     | <=0.5 | <=2 | <=0.03 |
| III | 2002-N16-044 | Urine |        | <=2 | 4   | <=0.5 | 8     | <=0.5 | <=2 | <=0.03 |
| III | 2002-N16-203 | Blood |        | <=2 | >16 | <=0.5 | 4     | <=0.5 | <=2 | <=0.03 |
| III | 2002-N16-209 | Blood |        | <=2 | >16 | <=0.5 | 8     | <=0.5 | 8   | >2     |

|     |              |       |    |     |     |       |     |       |     |        |
|-----|--------------|-------|----|-----|-----|-------|-----|-------|-----|--------|
| III | 2002-N17-004 | Urine | 46 | <=2 | >16 | <=0.5 | 8   | <=0.5 | 4   | 0.25   |
| III | 2002-N17-006 | Urine | 33 | <=2 | >16 | <=0.5 | 8   | <=0.5 | <=2 | 0.25   |
| III | 2002-N17-007 | Urine | 76 | 4   | >16 | <=0.5 | 8   | <=0.5 | 4   | 0.25   |
| III | 2002-N17-013 | Urine | 22 | 4   | >16 | <=0.5 | 8   | <=0.5 | 4   | 0.5    |
| III | 2002-N17-020 | Other | 68 | <=2 | 4   | <=0.5 | 4   | <=0.5 | <=2 | <=0.03 |
| III | 2002-N17-021 | Urine | 43 | <=2 | >16 | >16   | >16 | >16   | >16 | <=0.03 |
| III | 2002-N17-023 | Urine | 47 | <=2 | >16 | <=0.5 | 8   | <=0.5 | 4   | <=0.03 |
| III | 2002-N17-025 | Urine | 60 | <=2 | 4   | <=0.5 | 4   | <=0.5 | <=2 | <=0.03 |
| III | 2002-N17-027 | Other | 91 | <=2 | >16 | <=0.5 | 8   | <=0.5 | <=2 | <=0.03 |
| III | 2002-N17-034 | Urine | 22 | 4   | 4   | <=0.5 | 4   | <=0.5 | <=2 | <=0.03 |
| III | 2002-N17-039 | Urine | 43 | <=2 | 4   | <=0.5 | 4   | <=0.5 | <=2 | <=0.03 |
| III | 2002-N17-041 | Urine | 83 | <=2 | >16 | <=0.5 | 8   | <=0.5 | 4   | <=0.03 |
| III | 2002-N17-047 | Blood | 47 | <=2 | <=1 | <=0.5 | 1   | <=0.5 | <=2 | 0.12   |
| III | 2002-N17-048 | Urine | 4  | <=2 | >16 | <=0.5 | 8   | <=0.5 | 4   | 1      |
| III | 2002-N17-050 | Urine | 43 | <=2 | >16 | <=0.5 | 8   | <=0.5 | <=2 | <=0.03 |
| III | 2002-N19-001 | Other | 15 | <=2 | >16 | <=0.5 | 8   | <=0.5 | <=2 | <=0.03 |
| III | 2002-N19-002 | Other | 71 | 8   | >16 | <=0.5 | 8   | <=0.5 | 4   | <=0.03 |
| III | 2002-N19-004 | Urine | 57 | 4   | >16 | <=0.5 | 8   | <=0.5 | <=2 | 0.5    |
| III | 2002-N19-005 | Urine | 24 | 4   | <=1 | <=0.5 | 2   | <=0.5 | <=2 | 0.06   |
| III | 2002-N19-007 | Urine | 71 | 4   | 8   | <=0.5 | 8   | <=0.5 | 8   | 0.25   |
| III | 2002-N19-010 | Urine | 75 | 4   | >16 | <=0.5 | 8   | <=0.5 | 16  | >2     |
| III | 2002-N19-012 | Urine | 20 | <=2 | >16 | <=0.5 | 8   | <=0.5 | <=2 | 0.12   |
| III | 2002-N19-014 | Urine | 84 | 4   | >16 | <=0.5 | 4   | <=0.5 | <=2 | <=0.03 |
| III | 2002-N19-015 | Urine | 31 | 4   | 2   | <=0.5 | 4   | <=0.5 | <=2 | <=0.03 |
| III | 2002-N19-017 | Other | 20 | <=2 | >16 | <=0.5 | 8   | <=0.5 | 4   | <=0.03 |
| III | 2002-N19-018 | Urine | 61 | <=2 | >16 | <=0.5 | 8   | <=0.5 | 4   | <=0.03 |
| III | 2002-N19-021 | Blood | 83 | <=2 | <=1 | <=0.5 | 1   | <=0.5 | <=2 | <=0.03 |
| III | 2002-N19-022 | Urine | 25 | 4   | >16 | <=0.5 | 8   | <=0.5 | 4   | <=0.03 |
| III | 2002-N19-024 | Other | 28 | <=2 | >16 | <=0.5 | 8   | <=0.5 | 4   | <=0.03 |
| III | 2002-N19-025 | Urine | 71 | 4   | >16 | <=0.5 | 4   | <=0.5 | <=2 | 0.12   |
| III | 2002-N19-026 | Urine | 37 | <=2 | 2   | <=0.5 | 4   | <=0.5 | <=2 | 0.12   |
| III | 2002-N19-028 | Urine | 46 | 4   | 4   | <=0.5 | 4   | <=0.5 | <=2 | <=0.03 |
| III | 2002-N19-030 | Other | 47 | <=2 | >16 | <=0.5 | 4   | <=0.5 | <=2 | 0.25   |
| III | 2002-N19-033 | Urine | 33 | <=2 | >16 | <=0.5 | 8   | <=0.5 | <=2 | <=0.03 |
| III | 2002-N19-034 | Urine | 83 | <=2 | >16 | <=0.5 | 8   | <=0.5 | <=2 | 0.5    |
| III | 2002-N19-035 | Urine | 80 | <=2 | 4   | <=0.5 | 4   | <=0.5 | <=2 | <=0.03 |
| III | 2002-N19-037 | Urine | 69 | <=2 | >16 | <=0.5 | 8   | <=0.5 | 4   | <=0.03 |
| III | 2002-N19-042 | Blood | 51 | <=2 | 4   | <=0.5 | 4   | <=0.5 | <=2 | <=0.03 |
| III | 2002-N19-049 | Urine | 35 | 4   | >16 | <=0.5 | 8   | <=0.5 | <=2 | <=0.03 |
| III | 2002-N19-203 | Blood | 86 | 4   | >16 | <=0.5 | 16  | <=0.5 | 16  | <=0.03 |
| III | 2002-N19-205 | Blood | 70 | 4   | >16 | >16   | 16  | 16    | >16 | 0.12   |
| III | 2002-N19-206 | Blood | 72 | <=2 | >16 | <=0.5 | 8   | <=0.5 | <=2 | <=0.03 |
| III | 2002-N19-207 | Blood | 70 | <=2 | >16 | <=0.5 | 8   | <=0.5 | <=2 | 2      |
| III | 2002-N19-208 | Blood | 74 | <=2 | 4   | <=0.5 | 4   | <=0.5 | <=2 | >2     |
| III | 2002-N19-209 | Blood | 75 | <=2 | >16 | <=0.5 | 8   | <=0.5 | <=2 | >2     |
| III | 2002-C08-001 | Other | 56 | <=2 | >16 | <=0.5 | 8   | <=0.5 | 4   | <=0.03 |
| III | 2002-C08-003 | Urine | 69 | <=2 | >16 | <=0.5 | 16  | <=0.5 | 4   | 0.12   |
| III | 2002-C08-006 | Urine | 58 | 4   | >16 | <=0.5 | 8   | <=0.5 | <=2 | <=0.03 |
| III | 2002-C08-007 | Other | 35 | 4   | >16 | <=0.5 | 8   | <=0.5 | <=2 | <=0.03 |
| III | 2002-C08-008 | Urine | 77 | <=2 | 2   | <=0.5 | 4   | <=0.5 | <=2 | <=0.03 |
| III | 2002-C08-013 | Other | 22 | <=2 | >16 | <=0.5 | 8   | <=0.5 | <=2 | <=0.03 |
| III | 2002-C08-014 | Urine | 24 | <=2 | >16 | <=0.5 | 16  | <=0.5 | <=2 | <=0.03 |
| III | 2002-C08-015 | Urine | 70 | <=2 | >16 | <=0.5 | 8   | <=0.5 | 4   | <=0.03 |
| III | 2002-C08-018 | Urine | 23 | <=2 | >16 | <=0.5 | 16  | <=0.5 | 8   | 0.25   |
| III | 2002-C08-021 | Urine | 71 | <=2 | >16 | <=0.5 | 8   | <=0.5 | <=2 | <=0.03 |
| III | 2002-C08-028 | Urine | 66 | 4   | >16 | 2     | 16  | <=0.5 | >16 | 0.25   |
| III | 2002-C08-032 | Urine | 83 | 4   | >16 | 2     | 8   | 1     | >16 | 0.06   |
| III | 2002-C08-036 | Other | 32 | 4   | >16 | 2     | 8   | <=0.5 | >16 | 0.12   |
| III | 2002-C08-037 | Urine | 72 | <=2 | 4   | <=0.5 | 8   | <=0.5 | 4   | <=0.03 |
| III | 2002-C08-040 | Urine | 72 | <=2 | 4   | <=0.5 | 4   | <=0.5 | <=2 | <=0.03 |
| III | 2002-C08-041 | Urine | 38 | <=2 | >16 | <=0.5 | 8   | <=0.5 | <=2 | <=0.03 |

|     |              |       |    |     |     |       |     |       |     |        |
|-----|--------------|-------|----|-----|-----|-------|-----|-------|-----|--------|
| III | 2002-C08-045 | Blood | 58 | <=2 | >16 | <=0.5 | 16  | <=0.5 | 8   | <=0.03 |
| III | 2002-C08-048 | Urine | 59 | <=2 | >16 | <=0.5 | 16  | <=0.5 | 16  | >2     |
| III | 2002-C08-049 | Blood | 37 | 4   | >16 | <=0.5 | 16  | <=0.5 | <=2 | <=0.03 |
| III | 2002-C08-050 | Blood | 76 | <=2 | >16 | <=0.5 | 16  | <=0.5 | 16  | <=0.03 |
| III | 2002-S11-001 | Blood | 81 | <=2 | >16 | <=0.5 | 4   | <=0.5 | 4   | 0.06   |
| III | 2002-S11-003 | Urine | 64 | 4   | >16 | <=0.5 | 8   | <=0.5 | <=2 | <=0.03 |
| III | 2002-S11-004 | Urine | 59 | 4   | >16 | >16   | >16 | >16   | >16 | >2     |
| III | 2002-S11-008 | Urine | 33 | <=2 | >16 | <=0.5 | 8   | <=0.5 | <=2 | 0.12   |
| III | 2002-S11-009 | Urine | 67 | <=2 | >16 | <=0.5 | 8   | <=0.5 | 4   | 0.25   |
| III | 2002-S11-010 | Urine | 42 | <=2 | 2   | <=0.5 | 4   | <=0.5 | <=2 | <=0.03 |
| III | 2002-S11-013 | Urine | 60 | 32  | >16 | 2     | >16 | 16    | >16 | <=0.03 |
| III | 2002-S11-014 | Urine | 80 | <=2 | >16 | 16    | >16 | >16   | >16 | 0.12   |
| III | 2002-S11-021 | Urine | 40 | <=2 | 4   | <=0.5 | 4   | <=0.5 | <=2 | <=0.03 |
| III | 2002-S11-022 | Urine | 83 | <=2 | 8   | <=0.5 | 4   | <=0.5 | <=2 | <=0.03 |
| III | 2002-S11-023 | Urine | 77 | 4   | 4   | <=0.5 | 4   | <=0.5 | <=2 | <=0.03 |
| III | 2002-S11-027 | Urine | 74 | <=2 | 4   | <=0.5 | 4   | <=0.5 | <=2 | <=0.03 |
| III | 2002-S11-034 | Blood | 22 | <=2 | >16 | <=0.5 | 8   | <=0.5 | 4   | 0.25   |
| III | 2002-S11-037 | Blood | 78 | <=2 | >16 | <=0.5 | >16 | <=0.5 | >16 | <=0.03 |
| III | 2002-S11-039 | Urine | 71 | 4   | 2   | <=0.5 | 2   | <=0.5 | <=2 | 0.06   |
| III | 2002-S11-043 | Urine | 55 | <=2 | >16 | <=0.5 | 4   | <=0.5 | <=2 | <=0.03 |
| III | 2002-S11-044 | Urine | 23 | <=2 | >16 | <=0.5 | 16  | <=0.5 | 8   | <=0.03 |
| III | 2002-S11-050 | Urine | 80 | 4   | >16 | <=0.5 | 8   | <=0.5 | 4   | >2     |
| III | 2002-S11-194 | Urine | 0  | <=2 | 4   | <=0.5 | 4   | <=0.5 | <=2 | <=0.03 |
| III | 2002-S11-204 | Blood | 73 | 4   | >16 | 16    | 16  | 4     | >16 | >2     |
| III | 2002-S11-215 | Blood | 77 | <=2 | >16 | <=0.5 | 8   | <=0.5 | <=2 | 0.12   |
| III | 2002-S11-229 | Blood | 56 | <=2 | >16 | <=0.5 | 8   | <=0.5 | 4   | >2     |
| III | 2002-N21-001 | Other | 81 | <=2 | >16 | <=0.5 | 8   | <=0.5 | <=2 | <=0.03 |
| III | 2002-N21-006 | Urine | 60 | <=2 | 2   | <=0.5 | 4   | <=0.5 | <=2 | <=0.03 |
| III | 2002-N21-007 | Urine | 18 | <=2 | >16 | <=0.5 | 16  | <=0.5 | 8   | <=0.03 |
| III | 2002-N21-013 | Urine | 21 | 4   | 4   | <=0.5 | 4   | <=0.5 | <=2 | <=0.03 |
| III | 2002-N21-014 | Urine | 80 | 4   | >16 | <=0.5 | 4   | <=0.5 | <=2 | <=0.03 |
| III | 2002-N21-017 | Other | 2  | <=2 | >16 | <=0.5 | 8   | <=0.5 | 4   | <=0.03 |
| III | 2002-N21-025 | Urine | 49 | <=2 | >16 | <=0.5 | >16 | <=0.5 | >16 | 0.12   |
| III | 2002-N21-029 | Other | 52 | <=2 | >16 | <=0.5 | 8   | <=0.5 | <=2 | 0.25   |
| III | 2002-N21-035 | Urine | 52 | <=2 | >16 | <=0.5 | 8   | <=0.5 | <=2 | 0.5    |
| III | 2002-N21-037 | Urine | 51 | 4   | 2   | <=0.5 | 4   | <=0.5 | <=2 | <=0.03 |
| III | 2002-N21-039 | Urine | 52 | <=2 | >16 | <=0.5 | 8   | <=0.5 | 4   | >2     |
| III | 2002-N21-040 | Urine | 36 | <=2 | >16 | <=0.5 | 8   | <=0.5 | 4   | 1      |
| III | 2002-N21-045 | Urine | 52 | <=2 | 4   | <=0.5 | 4   | <=0.5 | <=2 | <=0.03 |
| III | 2002-N21-047 | Urine | 42 | <=2 | 2   | <=0.5 | 2   | <=0.5 | <=2 | <=0.03 |
| III | 2002-N21-050 | Urine | 75 | <=2 | >16 | 2     | >16 | 2     | >16 | 0.25   |
| III | 2002-N21-204 | Blood | 57 | <=2 | 4   | <=0.5 | 4   | <=0.5 | <=2 | <=0.03 |
| III | 2002-N21-218 | Blood | 58 | <=2 | >16 | <=0.5 | 8   | <=0.5 | <=2 | <=0.03 |
| III | 2002-N21-219 | Blood | 51 | <=2 | >16 | <=0.5 | 8   | <=0.5 | <=2 | 0.06   |
| III | 2002-C09-001 | Urine | 72 | <=2 | >16 | <=0.5 | 8   | <=0.5 | 4   | 0.5    |
| III | 2002-C09-008 | Other | 54 | <=2 | 4   | <=0.5 | 8   | <=0.5 | <=2 | <=0.03 |
| III | 2002-C09-009 | Blood | 70 | <=2 | >16 | <=0.5 | 16  | <=0.5 | <=2 | <=0.03 |
| III | 2002-C09-013 | Urine | 47 | <=2 | 4   | <=0.5 | 4   | <=0.5 | <=2 | <=0.03 |
| III | 2002-C09-016 | Other | 22 | <=2 | >16 | <=0.5 | 4   | <=0.5 | <=2 | 0.25   |
| III | 2002-C09-017 | Other | 16 | <=2 | >16 | <=0.5 | 16  | <=0.5 | <=2 | <=0.03 |
| III | 2002-C09-020 | Urine | 0  | 4   | >16 | <=0.5 | >16 | <=0.5 | >16 | <=0.03 |
| III | 2002-C09-021 | Urine | 51 | <=2 | 4   | <=0.5 | 4   | <=0.5 | <=2 | <=0.03 |
| III | 2002-C09-023 | Urine | 79 | <=2 | >16 | <=0.5 | 8   | <=0.5 | <=2 | >2     |
| III | 2002-C09-024 | Urine | 81 | 8   | >16 | >16   | 8   | 16    | >16 | >2     |
| III | 2002-C09-034 | Urine | 87 | <=2 | >16 | <=0.5 | 16  | <=0.5 | 4   | <=0.03 |
| III | 2002-C09-036 | Other | 86 | 4   | >16 | <=0.5 | 8   | <=0.5 | 8   | >2     |
| III | 2002-C09-038 | Other | 0  | <=2 | 4   | <=0.5 | 4   | <=0.5 | <=2 | <=0.03 |
| III | 2002-C09-039 | Other | 13 | <=2 | >16 | <=0.5 | 8   | <=0.5 | 4   | >2     |
| III | 2002-C10-002 | Urine | 24 | <=2 | >16 | <=0.5 | 8   | <=0.5 | <=2 | 0.12   |
| III | 2002-C10-003 | Blood | 66 | <=2 | >16 | <=0.5 | 8   | <=0.5 | 4   | <=0.03 |
| III | 2002-C10-006 | Urine | 75 | <=2 | >16 | <=0.5 | 8   | <=0.5 | <=2 | <=0.03 |

|     |              |       |    |     |     |       |    |       |     |        |
|-----|--------------|-------|----|-----|-----|-------|----|-------|-----|--------|
| III | 2002-C10-007 | Urine | 74 | <=2 | >16 | <=0.5 | 8  | <=0.5 | <=2 | <=0.03 |
| III | 2002-C10-009 | Blood | 79 | <=2 | >16 | <=0.5 | 8  | <=0.5 | <=2 | 0.5    |
| III | 2002-C10-010 | Urine | 1  | <=2 | >16 | <=0.5 | 8  | <=0.5 | <=2 | <=0.03 |
| III | 2002-C10-012 | Urine | 71 | <=2 | >16 | <=0.5 | 16 | <=0.5 | 8   | <=0.03 |
| III | 2002-C10-013 | Urine | 41 | <=2 | >16 | <=0.5 | 8  | <=0.5 | 4   | <=0.03 |
| III | 2002-C10-019 | Urine | 64 | <=2 | >16 | <=0.5 | 8  | <=0.5 | <=2 | 0.5    |
| III | 2002-C10-026 | Urine | 72 | 4   | >16 | <=0.5 | 16 | <=0.5 | 8   | >2     |
| III | 2002-C10-029 | Urine | 68 | <=2 | <=1 | <=0.5 | 1  | <=0.5 | <=2 | <=0.03 |
| III | 2002-C10-031 | Blood | 74 | <=2 | 4   | <=0.5 | 8  | <=0.5 | <=2 | <=0.03 |
| III | 2002-C10-032 | Blood | 85 | <=2 | 2   | <=0.5 | 4  | <=0.5 | <=2 | <=0.03 |
| III | 2002-C10-034 | Urine | 41 | <=2 | >16 | <=0.5 | 8  | <=0.5 | 4   | 0.5    |
| III | 2002-C10-035 | Urine | 82 | <=2 | 4   | <=0.5 | 4  | <=0.5 | <=2 | <=0.03 |
| III | 2002-C10-038 | Blood | 65 | <=2 | >16 | <=0.5 | 16 | <=0.5 | 4   | 0.25   |
| III | 2002-C10-041 | Blood | 75 | <=2 | 2   | <=0.5 | 4  | <=0.5 | <=2 | <=0.03 |
| III | 2002-C10-044 | Urine | 80 | 8   | >16 | <=0.5 | 8  | <=0.5 | <=2 | <=0.03 |
| III | 2002-C10-049 | Urine | 68 | 8   | >16 | 2     | 16 | 1     | >16 | >2     |
| III | 2002-C10-202 | Blood | 27 | <=2 | >16 | <=0.5 | 16 | <=0.5 | 16  | <=0.03 |
| III | 2002-C10-213 | Blood | 55 | <=2 | >16 | <=0.5 | 8  | <=0.5 | 4   | <=0.03 |
| III | 2002-C10-214 | Blood | 48 | 4   | >16 | <=0.5 | 8  | <=0.5 | <=2 | 0.25   |
| III | 2002-E04-001 | Other | 46 | <=2 | >16 | <=0.5 | 16 | <=0.5 | 8   | <=0.03 |
| III | 2002-E04-002 | Urine | 77 | <=2 | >16 | <=0.5 | 8  | <=0.5 | <=2 | <=0.03 |
| III | 2002-E04-011 | Urine | 66 | <=2 | >16 | <=0.5 | 4  | <=0.5 | <=2 | 0.12   |
| III | 2002-E04-020 | Urine | 10 | 4   | >16 | <=0.5 | 8  | <=0.5 | 4   | 0.5    |
| III | 2002-E04-022 | Urine | 51 | <=2 | 4   | <=0.5 | 4  | <=0.5 | <=2 | <=0.03 |
| III | 2002-E04-023 | Urine | 66 | <=2 | >16 | <=0.5 | 16 | <=0.5 | 4   | <=0.03 |
| III | 2002-E04-027 | Urine | 57 | <=2 | 4   | <=0.5 | 4  | <=0.5 | <=2 | 0.12   |
| III | 2002-E04-030 | Blood | 53 | <=2 | >16 | <=0.5 | 8  | <=0.5 | <=2 | <=0.03 |
| III | 2002-E04-032 | Urine |    | <=2 | 2   | <=0.5 | 4  | <=0.5 | <=2 | <=0.03 |
| III | 2002-E04-033 | Urine | 76 | 4   | >16 | >16   | 16 | 2     | >16 | >2     |
| III | 2002-E04-037 | Urine | 35 | 8   | >16 | <=0.5 | 8  | <=0.5 | <=2 | <=0.03 |
| III | 2002-E04-038 | Blood | 56 | <=2 | 4   | <=0.5 | 4  | <=0.5 | <=2 | <=0.03 |
| III | 2002-E04-039 | Blood | 73 | <=2 | >16 | <=0.5 | 8  | <=0.5 | <=2 | <=0.03 |
| III | 2002-E04-040 | Blood | 80 | <=2 | >16 | <=0.5 | 8  | <=0.5 | <=2 | <=0.03 |
| III | 2002-E04-045 | Urine | 32 | 4   | >16 | <=0.5 | 8  | <=0.5 | <=2 | <=0.03 |
| III | 2002-E04-046 | Urine | 75 | <=2 | >16 | <=0.5 | 8  | <=0.5 | <=2 | <=0.03 |
| III | 2002-E04-201 | Blood | 33 | <=2 | >16 | <=0.5 | 8  | <=0.5 | <=2 | 0.25   |
| III | 2002-E04-202 | Blood | 65 | <=2 | >16 | <=0.5 | 8  | <=0.5 | <=2 | 0.06   |
| III | 2002-E04-205 | Blood | 82 | 4   | >16 | <=0.5 | 8  | <=0.5 | 4   | >2     |
| III | 2002-E04-208 | Blood | 75 | <=2 | >16 | <=0.5 | 8  | <=0.5 | <=2 | >2     |
| III | 2002-E04-215 | Blood | 46 | <=2 | 4   | <=0.5 | 4  | <=0.5 | <=2 | 0.06   |
| III | 2002-E04-218 | Blood | 61 | <=2 | >16 | <=0.5 | 8  | <=0.5 | 8   | <=0.03 |
| IV  | 2004-S01-002 | Blood | 19 | 4   | >16 | <=0.5 | 8  | <=0.5 | <=2 | <=0.03 |
| IV  | 2004-S01-003 | Blood | 42 | <=2 | >16 | <=0.5 | 16 | <=0.5 | 4   | 0.25   |
| IV  | 2004-S01-004 | Blood | 53 | <=2 | >16 | <=0.5 | 8  | <=0.5 | 16  | >2     |
| IV  | 2004-S01-009 | Urine | 62 | <=2 | 4   | <=0.5 | 4  | <=0.5 | <=2 | <=0.03 |
| IV  | 2004-S01-015 | Urine | 73 | <=2 | >16 | <=0.5 | 8  | <=0.5 | 4   | 1      |
| IV  | 2004-S01-020 | Urine | 62 | <=2 | >16 | <=0.5 | 16 | <=0.5 | 8   | <=0.03 |
| IV  | 2004-S01-021 | Urine | 40 | 4   | 4   | <=0.5 | 8  | <=0.5 | 4   | <=0.03 |
| IV  | 2004-S01-023 | Other | 32 | <=2 | >16 | <=0.5 | 8  | <=0.5 | 4   | <=0.03 |
| IV  | 2004-S01-031 | Urine | 56 | 4   | >16 | <=0.5 | 8  | <=0.5 | 4   | <=0.03 |
| IV  | 2004-S01-033 | Urine | 59 | 4   | >16 | <=0.5 | 16 | <=0.5 | 8   | 1      |
| IV  | 2004-S01-037 | Other | 43 | 8   | >16 | <=0.5 | 8  | <=0.5 | 8   | >2     |
| IV  | 2004-S01-042 | Urine | 80 | <=2 | 4   | <=0.5 | 4  | <=0.5 | <=2 | <=0.03 |
| IV  | 2004-S01-044 | Urine | 33 | <=2 | 4   | <=0.5 | 4  | <=0.5 | <=2 | <=0.03 |
| IV  | 2004-S01-048 | Urine | 22 | 4   | 4   | <=0.5 | 4  | <=0.5 | <=2 | <=0.03 |
| IV  | 2004-S01-050 | Urine | 53 | <=2 | 4   | <=0.5 | 4  | <=0.5 | <=2 | <=0.03 |
| IV  | 2004-S01-185 | Urine | 1  | 4   | 4   | <=0.5 | 4  | <=0.5 | 4   | <=0.03 |
| IV  | 2004-S01-212 | Blood | 60 | <=2 | 4   | <=0.5 | 8  | <=0.5 | 4   | <=0.03 |
| IV  | 2004-C01-003 | Blood | 88 | <=2 | <=1 | <=0.5 | 2  | <=0.5 | <=2 | 0.12   |
| IV  | 2004-C01-005 | Urine | 78 | <=2 | >16 | <=0.5 | 8  | <=0.5 | <=2 | 0.12   |
| IV  | 2004-C01-007 | Urine | 50 | <=2 | >16 | <=0.5 | 8  | <=0.5 | <=2 | 0.25   |

|    |              |       |    |     |     |       |     |       |     |        |
|----|--------------|-------|----|-----|-----|-------|-----|-------|-----|--------|
| IV | 2004-C01-010 | Blood | 52 | 4   | >16 | <=0.5 | 8   | <=0.5 | 4   | 0.06   |
| IV | 2004-C01-013 | Urine | 49 | <=2 | >16 | <=0.5 | 8   | <=0.5 | 8   | >2     |
| IV | 2004-C01-017 | Other | 49 | 4   | >16 | <=0.5 | 8   | <=0.5 | 4   | 0.25   |
| IV | 2004-C01-025 | Urine | 0  | <=2 | 2   | <=0.5 | 2   | <=0.5 | <=2 | <=0.03 |
| IV | 2004-C01-030 | Urine | 52 | 8   | >16 | <=0.5 | 8   | <=0.5 | <=2 | <=0.03 |
| IV | 2004-C01-031 | Urine | 47 | <=2 | >16 | <=0.5 | 8   | <=0.5 | 4   | 0.25   |
| IV | 2004-C01-032 | Urine | 1  | 4   | >16 | <=0.5 | 8   | <=0.5 | 4   | <=0.03 |
| IV | 2004-C01-036 | Urine | 73 | 4   | >16 | <=0.5 | 8   | <=0.5 | 4   | 0.25   |
| IV | 2004-C01-037 | Urine | 76 | 4   | 4   | <=0.5 | 8   | <=0.5 | 8   | 0.25   |
| IV | 2004-C01-038 | Urine | 23 | <=2 | >16 | <=0.5 | 16  | <=0.5 | 16  | <=0.03 |
| IV | 2004-C01-041 | Urine | 63 | 4   | 2   | <=0.5 | 4   | <=0.5 | <=2 | <=0.03 |
| IV | 2004-C01-042 | Urine | 86 | <=2 | >16 | <=0.5 | 8   | <=0.5 | >16 | 0.06   |
| IV | 2004-C01-043 | Urine | 78 | <=2 | 4   | <=0.5 | 8   | <=0.5 | <=2 | <=0.03 |
| IV | 2004-C01-045 | Urine | 76 | 8   | >16 | <=0.5 | 16  | <=0.5 | 4   | 0.25   |
| IV | 2004-C01-214 | Blood | 61 | <=2 | 4   | <=0.5 | 8   | <=0.5 | <=2 | <=0.03 |
| IV | 2004-C02-002 | Urine | 4  | <=2 | >16 | <=0.5 | 16  | <=0.5 | >16 | >2     |
| IV | 2004-C02-007 | Urine | 29 | 8   | >16 | <=0.5 | 8   | <=0.5 | 8   | <=0.03 |
| IV | 2004-C02-008 | Other | 0  | <=2 | >16 | 2     | >16 | 1     | >16 | 1      |
| IV | 2004-C02-014 | Urine | 10 | 4   | 4   | <=0.5 | 4   | <=0.5 | <=2 | <=0.03 |
| IV | 2004-C02-015 | Urine | 58 | <=2 | >16 | <=0.5 | 8   | <=0.5 | 4   | <=0.03 |
| IV | 2004-C02-020 | Other | 41 | <=2 | >16 | <=0.5 | 8   | <=0.5 | 4   | 0.12   |
| IV | 2004-C02-024 | Urine | 72 | 4   | >16 | >16   | >16 | >16   | >16 | >2     |
| IV | 2004-C02-026 | Urine | 88 | 4   | 4   | <=0.5 | 4   | <=0.5 | <=2 | <=0.03 |
| IV | 2004-C02-028 | Urine | 23 | 4   | >16 | <=0.5 | 8   | <=0.5 | <=2 | 0.25   |
| IV | 2004-C02-030 | Urine | 3  | <=2 | >16 | 4     | >16 | 8     | >16 | <=0.03 |
| IV | 2004-C02-031 | Urine | 62 | <=2 | >16 | <=0.5 | 16  | <=0.5 | 8   | 1      |
| IV | 2004-C02-032 | Urine | 28 | <=2 | >16 | <=0.5 | 16  | <=0.5 | 8   | 1      |
| IV | 2004-C02-033 | Urine | 62 | 4   | >16 | >16   | >16 | >16   | >16 | 2      |
| IV | 2004-C02-035 | Urine | 26 | <=2 | >16 | <=0.5 | 8   | <=0.5 | <=2 | 0.12   |
| IV | 2004-C02-039 | Urine | 63 | <=2 | >16 | <=0.5 | 8   | <=0.5 | <=2 | 0.25   |
| IV | 2004-C02-040 | Urine | 0  | 4   | >16 | <=0.5 | 4   | <=0.5 | <=2 | <=0.03 |
| IV | 2004-C02-041 | Urine | 30 | <=2 | >16 | <=0.5 | 16  | <=0.5 | >16 | <=0.03 |
| IV | 2004-C02-043 | Urine | 77 | <=2 | >16 | <=0.5 | 8   | <=0.5 | 4   | <=0.03 |
| IV | 2004-C02-201 | Blood | 51 | 4   | >16 | 4     | >16 | >16   | >16 | >2     |
| IV | 2004-C02-217 | Blood | 66 | <=2 | >16 | 8     | >16 | 4     | >16 | <=0.03 |
| IV | 2004-C04-006 | Urine | 65 | 4   | >16 | <=0.5 | 8   | <=0.5 | <=2 | 0.25   |
| IV | 2004-C04-016 | Urine | 30 | <=2 | >16 | <=0.5 | 8   | <=0.5 | <=2 | <=0.03 |
| IV | 2004-C04-017 | Blood | 94 | 4   | >16 | <=0.5 | 16  | <=0.5 | 4   | 0.25   |
| IV | 2004-C04-019 | Other | 56 | <=2 | 8   | <=0.5 | 4   | <=0.5 | 4   | <=0.03 |
| IV | 2004-C04-020 | Blood | 82 | 4   | 4   | <=0.5 | 4   | <=0.5 | 4   | <=0.03 |
| IV | 2004-C04-021 | Urine | 46 | 16  | >16 | <=0.5 | 16  | <=0.5 | 4   | <=0.03 |
| IV | 2004-C04-028 | Urine | 78 | >32 | >16 | >16   | >16 | >16   | >16 | >2     |
| IV | 2004-C04-030 | Urine | 67 | <=2 | >16 | <=0.5 | 16  | <=0.5 | 4   | <=0.03 |
| IV | 2004-C04-032 | Urine | 57 | 4   | >16 | 2     | >16 | 4     | >16 | <=0.03 |
| IV | 2004-C04-033 | Urine | 30 | <=2 | >16 | <=0.5 | 8   | <=0.5 | 4   | 0.25   |
| IV | 2004-C04-037 | Blood | 89 | >32 | >16 | >16   | >16 | >16   | >16 | >2     |
| IV | 2004-C04-042 | Urine | 32 | 4   | >16 | <=0.5 | 8   | <=0.5 | 4   | 0.25   |
| IV | 2004-C04-043 | Urine | 57 | 4   | 8   | <=0.5 | 4   | <=0.5 | <=2 | <=0.03 |
| IV | 2004-C04-203 | Blood | 75 | <=2 | >16 | <=0.5 | 16  | <=0.5 | <=2 | 0.25   |
| IV | 2004-C04-204 | Blood | 87 | <=2 | >16 | <=0.5 | 16  | <=0.5 | >16 | <=0.03 |
| IV | 2004-S05-001 | Urine | 70 | <=2 | >16 | <=0.5 | 4   | <=0.5 | <=2 | 1      |
| IV | 2004-S05-005 | Other | 22 | 4   | >16 | <=0.5 | 8   | <=0.5 | 4   | <=0.03 |
| IV | 2004-S05-009 | Other | 79 | <=2 | >16 | 2     | 8   | 1     | >16 | >2     |
| IV | 2004-S05-010 | Urine | 59 | <=2 | >16 | <=0.5 | 8   | <=0.5 | 8   | >2     |
| IV | 2004-S05-015 | Urine | 37 | <=2 | >16 | <=0.5 | 8   | <=0.5 | <=2 | 0.12   |
| IV | 2004-S05-020 | Other | 53 | 4   | 4   | <=0.5 | 4   | <=0.5 | <=2 | <=0.03 |
| IV | 2004-S05-024 | Urine | 67 | <=2 | 4   | <=0.5 | 4   | <=0.5 | <=2 | <=0.03 |
| IV | 2004-S05-025 | Urine | 9  | 4   | >16 | <=0.5 | 8   | <=0.5 | 4   | 1      |
| IV | 2004-S05-033 | Urine | 37 | <=2 | >16 | <=0.5 | 8   | <=0.5 | <=2 | 0.12   |
| IV | 2004-S05-036 | Urine | 62 | <=2 | >16 | <=0.5 | 8   | <=0.5 | 8   | >2     |
| IV | 2004-S05-037 | Urine | 72 | 8   | 4   | <=0.5 | 4   | <=0.5 | <=2 | <=0.03 |



|    |              |       |    |     |     |       |     |       |     |        |
|----|--------------|-------|----|-----|-----|-------|-----|-------|-----|--------|
| IV | 2004-S05-038 | Urine | 70 | <=2 | >16 | 16    | >16 | 16    | >16 | >2     |
| IV | 2004-S05-039 | Urine | 7  | 8   | >16 | <=0.5 | 16  | <=0.5 | 8   | <=0.03 |
| IV | 2004-S05-040 | Urine | 68 | 4   | >16 | <=0.5 | 16  | <=0.5 | 4   | <=0.03 |
| IV | 2004-S05-042 | Urine | 45 | <=2 | >16 | <=0.5 | 8   | <=0.5 | <=2 | <=0.03 |
| IV | 2004-S05-044 | Urine | 78 | <=2 | >16 | 16    | >16 | >16   | >16 | >2     |
| IV | 2004-S05-045 | Urine | 75 | 4   | >16 | <=0.5 | 8   | <=0.5 | 8   | 0.5    |
| IV | 2004-S05-047 | Urine | 2  | 4   | 4   | <=0.5 | 8   | <=0.5 | <=2 | <=0.03 |
| IV | 2004-S05-048 | Urine | 78 | <=2 | >16 | <=0.5 | 16  | <=0.5 | 16  | >2     |
| IV | 2004-S05-181 | Urine | 7  | 4   | 2   | <=0.5 | 4   | <=0.5 | 4   | >2     |
| IV | 2004-S06-003 | Urine | 69 | 4   | >16 | <=0.5 | 8   | <=0.5 | 16  | >2     |
| IV | 2004-S06-004 | Urine | 57 | 4   | 4   | <=0.5 | 4   | <=0.5 | <=2 | <=0.03 |
| IV | 2004-S06-005 | Urine | 73 | <=2 | 2   | <=0.5 | 4   | <=0.5 | <=2 | <=0.03 |
| IV | 2004-S06-008 | Other | 0  | <=2 | 4   | <=0.5 | 4   | <=0.5 | <=2 | <=0.03 |
| IV | 2004-S06-009 | Urine | 79 | 4   | >16 | <=0.5 | 8   | <=0.5 | 4   | <=0.03 |
| IV | 2004-S06-011 | Urine | 24 | <=2 | >16 | <=0.5 | 8   | <=0.5 | 4   | 0.5    |
| IV | 2004-S06-012 | Urine | 51 | <=2 | >16 | <=0.5 | 8   | <=0.5 | 4   | <=0.03 |
| IV | 2004-S06-014 | Urine | 58 | 4   | 2   | <=0.5 | 4   | <=0.5 | <=2 | <=0.03 |
| IV | 2004-S06-015 | Other | 28 | <=2 | >16 | <=0.5 | 8   | <=0.5 | 4   | <=0.03 |
| IV | 2004-S06-016 | Urine | 83 | 4   | 4   | <=0.5 | 8   | <=0.5 | <=2 | 1      |
| IV | 2004-S06-018 | Other | 55 | 16  | >16 | >16   | 16  | 16    | >16 | >2     |
| IV | 2004-S06-022 | Urine | 32 | <=2 | >16 | <=0.5 | 8   | <=0.5 | 4   | <=0.03 |
| IV | 2004-S06-025 | Urine | 12 | <=2 | >16 | <=0.5 | 8   | <=0.5 | <=2 | 0.12   |
| IV | 2004-S06-027 | Urine | 68 | <=2 | >16 | 8     | 8   | 1     | >16 | >2     |
| IV | 2004-S06-028 | Urine | 37 | <=2 | <=1 | <=0.5 | 1   | <=0.5 | <=2 | <=0.03 |
| IV | 2004-S06-029 | Urine | 39 | <=2 | 4   | <=0.5 | 4   | <=0.5 | <=2 | <=0.03 |
| IV | 2004-S06-030 | Other | 30 | <=2 | >16 | <=0.5 | 8   | <=0.5 | 4   | <=0.03 |
| IV | 2004-S06-036 | Urine | 41 | 4   | >16 | <=0.5 | 8   | <=0.5 | 4   | <=0.03 |
| IV | 2004-S06-038 | Urine | 44 | 4   | 4   | <=0.5 | 4   | <=0.5 | <=2 | 0.25   |
| IV | 2004-S06-039 | Urine | 29 | 4   | 4   | <=0.5 | 4   | <=0.5 | <=2 | <=0.03 |
| IV | 2004-S06-040 | Urine | 80 | <=2 | >16 | <=0.5 | 16  | <=0.5 | 8   | >2     |
| IV | 2004-S06-041 | Urine | 92 | <=2 | >16 | <=0.5 | 8   | <=0.5 | 4   | 0.25   |
| IV | 2004-S06-042 | Other | 27 | 4   | >16 | <=0.5 | 8   | <=0.5 | <=2 | 0.12   |
| IV | 2004-S06-047 | Urine | 67 | <=2 | 4   | <=0.5 | 8   | <=0.5 | 4   | 0.12   |
| IV | 2004-S06-049 | Urine | 67 | 4   | >16 | <=0.5 | 8   | <=0.5 | 8   | >2     |
| IV | 2004-S06-201 | Blood | 68 | 8   | >16 | 2     | >16 | 16    | >16 | 0.25   |
| IV | 2004-S06-213 | Blood | 61 | <=2 | 2   | <=0.5 | 2   | <=0.5 | <=2 | 0.25   |
| IV | 2004-S06-215 | Blood | 57 | 4   | >16 | <=0.5 | 8   | <=0.5 | 4   | <=0.03 |
| IV | 2004-S07-010 | Urine | 5  | 4   | >16 | <=0.5 | 8   | <=0.5 | <=2 | 0.5    |
| IV | 2004-S07-011 | Urine | 73 | <=2 | >16 | <=0.5 | 8   | <=0.5 | <=2 | 0.25   |
| IV | 2004-S07-012 | Other | 29 | 4   | 4   | <=0.5 | 8   | <=0.5 | 4   | <=0.03 |
| IV | 2004-S07-013 | Urine | 32 | 16  | >16 | <=0.5 | 8   | <=0.5 | <=2 | <=0.03 |
| IV | 2004-S07-015 | Urine | 83 | <=2 | >16 | <=0.5 | 8   | <=0.5 | <=2 | 0.25   |
| IV | 2004-S07-018 | Urine | 48 | 4   | >16 | <=0.5 | 8   | <=0.5 | <=2 | 0.25   |
| IV | 2004-S07-019 | Urine | 79 | <=2 | 8   | <=0.5 | 8   | <=0.5 | 16  | 0.5    |
| IV | 2004-S07-022 | Urine | 54 | 4   | >16 | <=0.5 | >16 | <=0.5 | >16 | <=0.03 |
| IV | 2004-S07-026 | Urine | 77 | <=2 | >16 | <=0.5 | 16  | <=0.5 | 16  | 0.12   |
| IV | 2004-S07-027 | Urine | 67 | <=2 | >16 | <=0.5 | 8   | <=0.5 | 4   | >2     |
| IV | 2004-S07-028 | Urine | 48 | <=2 | 2   | <=0.5 | 1   | <=0.5 | <=2 | <=0.03 |
| IV | 2004-S07-031 | Urine | 70 | 4   | >16 | <=0.5 | 8   | <=0.5 | <=2 | 0.25   |
| IV | 2004-S07-034 | Urine | 32 | <=2 | >16 | <=0.5 | 8   | <=0.5 | 16  | <=0.03 |
| IV | 2004-S07-037 | Urine | 44 | <=2 | 4   | <=0.5 | 8   | <=0.5 | <=2 | <=0.03 |
| IV | 2004-S07-038 | Urine | 52 | <=2 | >16 | <=0.5 | 8   | <=0.5 | <=2 | <=0.03 |
| IV | 2004-S07-039 | Urine | 29 | <=2 | >16 | <=0.5 | 8   | <=0.5 | 4   | 0.5    |
| IV | 2004-S07-040 | Urine | 20 | <=2 | >16 | <=0.5 | 4   | <=0.5 | <=2 | <=0.03 |
| IV | 2004-S07-041 | Urine | 66 | <=2 | >16 | <=0.5 | 16  | <=0.5 | 16  | <=0.03 |
| IV | 2004-S07-042 | Urine | 24 | 4   | 4   | <=0.5 | 8   | <=0.5 | 4   | <=0.03 |
| IV | 2004-S07-043 | Urine | 71 | <=2 | 2   | <=0.5 | 4   | <=0.5 | <=2 | 0.25   |
| IV | 2004-S07-048 | Urine | 21 | 4   | 2   | <=0.5 | 4   | <=0.5 | <=2 | <=0.03 |
| IV | 2004-S07-202 | Blood | 75 | <=2 | <=1 | <=0.5 | 1   | <=0.5 | <=2 | <=0.03 |
| IV | 2004-S07-203 | Blood | 64 | <=2 | >16 | <=0.5 | 8   | <=0.5 | 4   | 0.25   |
| IV | 2004-S07-205 | Blood | 78 | <=2 | >16 | <=0.5 | 8   | <=0.5 | <=2 | 0.25   |

|    |              |       |    |     |     |       |     |       |     |        |
|----|--------------|-------|----|-----|-----|-------|-----|-------|-----|--------|
| IV | 2004-S07-206 | Blood | 35 | <=2 | >16 | <=0.5 | 8   | <=0.5 | 4   | <=0.03 |
| IV | 2004-S07-213 | Blood | 53 | 4   | >16 | <=0.5 | 8   | <=0.5 | 4   | 0.25   |
| IV | 2004-S07-216 | Blood | 49 | <=2 | >16 | <=0.5 | 8   | <=0.5 | <=2 | <=0.03 |
| IV | 2004-N05-003 | Urine | 1  | <=2 | >16 | <=0.5 | 16  | <=0.5 | 16  | <=0.03 |
| IV | 2004-N05-006 | Urine | 75 | 4   | >16 | <=0.5 | 16  | <=0.5 | >16 | 0.25   |
| IV | 2004-N05-009 | Urine |    | 4   | >16 | <=0.5 | 16  | <=0.5 | >16 | 0.12   |
| IV | 2004-N05-010 | Urine | 71 | 4   | 16  | <=0.5 | 8   | <=0.5 | 8   | <=0.03 |
| IV | 2004-N05-011 | Urine | 75 | <=2 | >16 | <=0.5 | >16 | <=0.5 | >16 | 0.12   |
| IV | 2004-N05-015 | Urine | 29 | 8   | 4   | <=0.5 | 4   | <=0.5 | <=2 | <=0.03 |
| IV | 2004-N05-016 | Urine | 64 | <=2 | >16 | <=0.5 | 8   | <=0.5 | <=2 | <=0.03 |
| IV | 2004-N05-018 | Urine | 64 | <=2 | >16 | <=0.5 | 8   | <=0.5 | 4   | <=0.03 |
| IV | 2004-N05-023 | Urine | 57 | 4   | >16 | 1     | 8   | <=0.5 | <=2 | <=0.03 |
| IV | 2004-N05-024 | Urine | 50 | 4   | >16 | <=0.5 | 8   | <=0.5 | 4   | 0.25   |
| IV | 2004-N05-028 | Urine |    | 4   | >16 | <=0.5 | 8   | <=0.5 | <=2 | 0.25   |
| IV | 2004-N05-029 | Urine | 63 | <=2 | >16 | <=0.5 | 8   | <=0.5 | 8   | >2     |
| IV | 2004-N05-030 | Other | 79 | 4   | >16 | 16    | >16 | >16   | >16 | 0.5    |
| IV | 2004-N05-032 | Urine | 3  | <=2 | >16 | <=0.5 | 8   | <=0.5 | 4   | <=0.03 |
| IV | 2004-N05-033 | Urine | 26 | <=2 | 4   | <=0.5 | 4   | <=0.5 | <=2 | <=0.03 |
| IV | 2004-N05-035 | Urine |    | 4   | >16 | <=0.5 | 8   | <=0.5 | 4   | >2     |
| IV | 2004-N05-038 | Urine |    | 4   | >16 | <=0.5 | 8   | <=0.5 | 4   | 0.25   |
| IV | 2004-N05-049 | Urine | 39 | <=2 | 2   | <=0.5 | 4   | <=0.5 | <=2 | <=0.03 |
| IV | 2004-N05-206 | Blood | 72 | <=2 | 4   | <=0.5 | 4   | <=0.5 | <=2 | <=0.03 |
| IV | 2004-N05-218 | Blood | 82 | <=2 | >16 | 4     | 16  | 1     | >16 | >2     |
| IV | 2004-N06-006 | Other | 26 | <=2 | >16 | <=0.5 | 8   | <=0.5 | <=2 | <=0.03 |
| IV | 2004-N06-013 | Blood | 66 | <=2 | >16 | <=0.5 | 8   | <=0.5 | 4   | 0.25   |
| IV | 2004-N06-014 | Blood | 67 | <=2 | >16 | <=0.5 | 8   | <=0.5 | <=2 | 0.25   |
| IV | 2004-N06-016 | Other | 46 | <=2 | >16 | <=0.5 | 8   | <=0.5 | <=2 | <=0.03 |
| IV | 2004-N06-017 | Urine | 45 | <=2 | >16 | 16    | >16 | >16   | >16 | >2     |
| IV | 2004-N06-018 | Urine | 88 | 4   | >16 | <=0.5 | 4   | <=0.5 | <=2 | <=0.03 |
| IV | 2004-N06-025 | Urine | 5  | <=2 | >16 | <=0.5 | 8   | <=0.5 | <=2 | 0.5    |
| IV | 2004-N06-026 | Urine | 61 | <=2 | >16 | <=0.5 | 8   | <=0.5 | <=2 | 0.5    |
| IV | 2004-N06-030 | Urine | 69 | <=2 | >16 | <=0.5 | 8   | <=0.5 | 4   | <=0.03 |
| IV | 2004-N06-044 | Urine | 62 | 4   | 4   | <=0.5 | 4   | <=0.5 | 4   | >2     |
| IV | 2004-N06-045 | Urine | 79 | <=2 | >16 | <=0.5 | 8   | <=0.5 | 4   | <=0.03 |
| IV | 2004-N06-046 | Urine | 6  | <=2 | 4   | <=0.5 | 4   | <=0.5 | <=2 | <=0.03 |
| IV | 2004-N06-207 | Blood | 67 | <=2 | >16 | <=0.5 | 8   | <=0.5 | <=2 | <=0.03 |
| IV | 2004-N06-213 | Blood | 54 | <=2 | 4   | <=0.5 | 4   | <=0.5 | <=2 | <=0.03 |
| IV | 2004-N06-214 | Blood | 70 | <=2 | 4   | <=0.5 | 4   | <=0.5 | <=2 | <=0.03 |
| IV | 2004-N06-215 | Blood | 57 | <=2 | >16 | <=0.5 | 8   | 2     | 4   | 0.12   |
| IV | 2004-N06-220 | Blood | 74 | <=2 | 4   | <=0.5 | 8   | <=0.5 | <=2 | <=0.03 |
| IV | 2004-N07-001 | Urine | 69 | <=2 | >16 | <=0.5 | 8   | <=0.5 | 8   | <=0.03 |
| IV | 2004-N07-011 | Other | 42 | 4   | >16 | <=0.5 | 16  | <=0.5 | >16 | >2     |
| IV | 2004-N07-014 | Urine | 36 | 4   | >16 | <=0.5 | 8   | <=0.5 | <=2 | 0.25   |
| IV | 2004-N07-022 | Urine | 57 | <=2 | >16 | <=0.5 | 8   | 1     | 4   | <=0.03 |
| IV | 2004-N07-023 | Urine | 76 | 4   | 4   | <=0.5 | 8   | <=0.5 | <=2 | <=0.03 |
| IV | 2004-N07-028 | Blood | 47 | <=2 | >16 | <=0.5 | 8   | <=0.5 | <=2 | 0.5    |
| IV | 2004-N07-031 | Urine | 52 | 8   | >16 | <=0.5 | 8   | <=0.5 | <=2 | >2     |
| IV | 2004-N07-033 | Urine | 78 | 4   | >16 | 8     | >16 | 8     | >16 | >2     |
| IV | 2004-N07-034 | Urine | 63 | <=2 | >16 | <=0.5 | 16  | <=0.5 | 8   | <=0.03 |
| IV | 2004-N07-038 | Blood | 70 | <=2 | >16 | <=0.5 | 8   | <=0.5 | 4   | 0.25   |
| IV | 2004-N07-046 | Urine | 63 | 8   | 4   | <=0.5 | 4   | <=0.5 | <=2 | 1      |
| IV | 2004-N07-047 | Other | 25 | <=2 | 2   | <=0.5 | 4   | <=0.5 | <=2 | <=0.03 |
| IV | 2004-N07-195 | Urine | 5  | 4   | >16 | <=0.5 | 8   | <=0.5 | 8   | 1      |
| IV | 2004-N07-201 | Blood | 76 | 4   | 4   | <=0.5 | 4   | <=0.5 | <=2 | 0.5    |
| IV | 2004-N07-210 | Blood | 53 | 8   | 8   | <=0.5 | 8   | <=0.5 | 8   | >2     |
| IV | 2004-N07-211 | Blood | 88 | 4   | >16 | <=0.5 | 8   | <=0.5 | 8   | <=0.03 |
| IV | 2004-S08-004 | Urine | 67 | 4   | 8   | <=0.5 | 8   | <=0.5 | 4   | <=0.03 |
| IV | 2004-S08-011 | Urine | 49 | 4   | >16 | <=0.5 | 8   | <=0.5 | <=2 | >2     |
| IV | 2004-S08-013 | Urine | 65 | 4   | >16 | <=0.5 | 8   | <=0.5 | 4   | <=0.03 |
| IV | 2004-S08-025 | Urine | 48 | 4   | >16 | <=0.5 | 8   | <=0.5 | 4   | <=0.03 |
| IV | 2004-S08-028 | Urine | 81 | 4   | >16 | <=0.5 | 8   | <=0.5 | 16  | >2     |

|    |              |       |    |     |     |       |     |       |     |        |
|----|--------------|-------|----|-----|-----|-------|-----|-------|-----|--------|
| IV | 2004-E02-001 | Urine | 80 | 4   | >16 | <=0.5 | 8   | <=0.5 | 16  | <=0.03 |
| IV | 2004-E02-005 | Urine | 33 | <=2 | >16 | <=0.5 | 8   | <=0.5 | 8   | >2     |
| IV | 2004-E02-007 | Urine | 71 | <=2 | >16 | <=0.5 | 8   | <=0.5 | <=2 | 0.25   |
| IV | 2004-E02-011 | Urine | 27 | <=2 | >16 | <=0.5 | 8   | <=0.5 | <=2 | <=0.03 |
| IV | 2004-E02-016 | Urine | 61 | 4   | 2   | <=0.5 | 4   | <=0.5 | <=2 | 0.25   |
| IV | 2004-E02-017 | Urine | 0  | 8   | >16 | <=0.5 | 16  | <=0.5 | 8   | 0.25   |
| IV | 2004-E02-020 | Urine | 1  | 4   | >16 | <=0.5 | 8   | <=0.5 | <=2 | <=0.03 |
| IV | 2004-E02-022 | Urine | 69 | <=2 | 4   | <=0.5 | 4   | <=0.5 | <=2 | <=0.03 |
| IV | 2004-E02-024 | Urine | 0  | <=2 | >16 | <=0.5 | 8   | <=0.5 | 8   | 0.25   |
| IV | 2004-E02-026 | Other | 39 | <=2 | 2   | <=0.5 | 4   | <=0.5 | <=2 | <=0.03 |
| IV | 2004-E02-030 | Urine | 20 | <=2 | >16 | <=0.5 | 16  | <=0.5 | 4   | <=0.03 |
| IV | 2004-E02-034 | Urine | 68 | <=2 | >16 | <=0.5 | 8   | <=0.5 | 8   | <=0.03 |
| IV | 2004-E02-038 | Urine | 44 | <=2 | >16 | <=0.5 | 8   | <=0.5 | <=2 | 0.5    |
| IV | 2004-E02-040 | Urine | 0  | 4   | 2   | <=0.5 | 4   | <=0.5 | <=2 | <=0.03 |
| IV | 2004-E02-041 | Urine | 76 | <=2 | >16 | <=0.5 | 4   | <=0.5 | <=2 | 0.12   |
| IV | 2004-E02-042 | Urine | 88 | <=2 | >16 | <=0.5 | 8   | <=0.5 | 4   | <=0.03 |
| IV | 2004-E02-043 | Urine | 24 | 4   | 4   | <=0.5 | 8   | <=0.5 | <=2 | <=0.03 |
| IV | 2004-E02-044 | Urine | 24 | 8   | >16 | <=0.5 | 8   | <=0.5 | 4   | 0.25   |
| IV | 2004-E02-048 | Urine | 42 | <=2 | 2   | <=0.5 | 8   | <=0.5 | <=2 | <=0.03 |
| IV | 2004-E02-049 | Urine | 24 | <=2 | >16 | <=0.5 | 8   | <=0.5 | 4   | 0.25   |
| IV | 2004-N08-001 | Blood | 75 | 16  | >16 | >16   | >16 | >16   | >16 | >2     |
| IV | 2004-N08-005 | Urine | 26 | <=2 | >16 | <=0.5 | 8   | <=0.5 | 4   | <=0.03 |
| IV | 2004-N08-009 | Urine | 37 | <=2 | >16 | <=0.5 | 8   | <=0.5 | 16  | <=0.03 |
| IV | 2004-N08-010 | Urine | 23 | <=2 | 4   | <=0.5 | 4   | <=0.5 | <=2 | <=0.03 |
| IV | 2004-N08-012 | Urine | 31 | <=2 | 4   | <=0.5 | 2   | <=0.5 | <=2 | <=0.03 |
| IV | 2004-N08-021 | Urine | 3  | <=2 | >16 | <=0.5 | 8   | <=0.5 | <=2 | 1      |
| IV | 2004-N08-022 | Urine | 29 | <=2 | 2   | <=0.5 | 4   | <=0.5 | <=2 | <=0.03 |
| IV | 2004-N08-023 | Blood | 87 | <=2 | >16 | 8     | 4   | 16    | >16 | >2     |
| IV | 2004-N08-028 | Urine | 29 | 4   | 4   | <=0.5 | 2   | <=0.5 | <=2 | <=0.03 |
| IV | 2004-N08-038 | Blood | 78 | <=2 | >16 | <=0.5 | 8   | <=0.5 | <=2 | <=0.03 |
| IV | 2004-N08-042 | Blood | 31 | <=2 | >16 | <=0.5 | 16  | <=0.5 | >16 | <=0.03 |
| IV | 2004-N08-044 | Urine | 41 | <=2 | 2   | <=0.5 | 4   | <=0.5 | <=2 | <=0.03 |
| IV | 2004-N08-045 | Urine | 89 | 4   | >16 | <=0.5 | 8   | <=0.5 | >16 | >2     |
| IV | 2004-N08-216 | Blood | 57 | 4   | >16 | <=0.5 | 8   | <=0.5 | 8   | 0.25   |
| IV | 2004-S09-009 | Urine | 91 | 16  | >16 | <=0.5 | 4   | <=0.5 | 16  | >2     |
| IV | 2004-S09-010 | Urine | 39 | 4   | >16 | <=0.5 | 16  | <=0.5 | 4   | <=0.03 |
| IV | 2004-S09-011 | Urine | 23 | <=2 | <=1 | <=0.5 | 1   | <=0.5 | <=2 | <=0.03 |
| IV | 2004-S09-012 | Urine | 61 | <=2 | <=1 | <=0.5 | 1   | <=0.5 | <=2 | <=0.03 |
| IV | 2004-S09-016 | Urine | 43 | <=2 | >16 | <=0.5 | 8   | <=0.5 | <=2 | <=0.03 |
| IV | 2004-S09-017 | Urine | 91 | <=2 | >16 | <=0.5 | 8   | <=0.5 | 16  | >2     |
| IV | 2004-S09-019 | Blood | 74 | <=2 | >16 | <=0.5 | 8   | <=0.5 | <=2 | <=0.03 |
| IV | 2004-S09-022 | Blood | 69 | 4   | >16 | 4     | >16 | 16    | >16 | <=0.03 |
| IV | 2004-S09-023 | Blood | 51 | <=2 | >16 | <=0.5 | >16 | 1     | >16 | 0.25   |
| IV | 2004-S09-025 | Urine | 79 | <=2 | >16 | 8     | >16 | 16    | >16 | <=0.03 |
| IV | 2004-S09-035 | Other | 35 | <=2 | 4   | <=0.5 | 8   | <=0.5 | <=2 | 0.25   |
| IV | 2004-S09-037 | Urine | 75 | <=2 | >16 | <=0.5 | 8   | <=0.5 | <=2 | 0.25   |
| IV | 2004-S09-038 | Urine | 39 | 4   | 4   | <=0.5 | 4   | <=0.5 | <=2 | <=0.03 |
| IV | 2004-S09-039 | Urine | 91 | <=2 | 2   | <=0.5 | 2   | <=0.5 | <=2 | 0.12   |
| IV | 2004-S09-045 | Blood | 83 | 4   | 2   | <=0.5 | 4   | <=0.5 | <=2 | <=0.03 |
| IV | 2004-S09-047 | Blood | 78 | <=2 | >16 | <=0.5 | 8   | <=0.5 | 4   | >2     |
| IV | 2004-S09-048 | Blood | 56 | <=2 | >16 | <=0.5 | 8   | <=0.5 | <=2 | <=0.03 |
| IV | 2004-S09-183 | Blood | 0  | <=2 | >16 | <=0.5 | 8   | <=0.5 | 4   | <=0.03 |
| IV | 2004-S09-202 | Blood | 0  | <=2 | <=1 | <=0.5 | 1   | <=0.5 | <=2 | <=0.03 |
| IV | 2004-S09-204 | Blood | 74 | 4   | >16 | <=0.5 | 16  | <=0.5 | 16  | <=0.03 |
| IV | 2004-E03-001 | Urine | 41 | <=2 | 2   | <=0.5 | 4   | <=0.5 | <=2 | 0.25   |
| IV | 2004-E03-004 | Urine | 51 | <=2 | 4   | <=0.5 | 4   | <=0.5 | <=2 | <=0.03 |
| IV | 2004-E03-013 | Urine | 91 | <=2 | 16  | <=0.5 | 2   | <=0.5 | <=2 | <=0.03 |
| IV | 2004-E03-020 | Other | 34 | <=2 | >16 | <=0.5 | 8   | <=0.5 | 4   | >2     |
| IV | 2004-E03-026 | Urine | 78 | <=2 | >16 | <=0.5 | 8   | <=0.5 | <=2 | 0.25   |
| IV | 2004-E03-030 | Urine | 67 | <=2 | 4   | <=0.5 | 8   | <=0.5 | <=2 | <=0.03 |
| IV | 2004-E03-031 | Urine | 53 | <=2 | >16 | >16   | 16  | 4     | >16 | >2     |

|    |              |       |    |     |     |       |     |       |     |        |
|----|--------------|-------|----|-----|-----|-------|-----|-------|-----|--------|
| IV | 2004-E03-044 | Urine | 64 | <=2 | 2   | <=0.5 | 4   | <=0.5 | <=2 | <=0.03 |
| IV | 2004-E03-046 | Urine | 68 | <=2 | >16 | 16    | >16 | 16    | >16 | 0.25   |
| IV | 2004-E03-050 | Urine | 26 | <=2 | >16 | 8     | >16 | 16    | >16 | >2     |
| IV | 2004-E03-203 | Blood | 62 | 4   | >16 | <=0.5 | 8   | <=0.5 | 4   | <=0.03 |
| IV | 2004-E03-204 | Blood | 59 | 4   | 8   | <=0.5 | 8   | <=0.5 | <=2 | <=0.03 |
| IV | 2004-C06-003 | Urine | 57 | <=2 | >16 | <=0.5 | 8   | <=0.5 | <=2 | >2     |
| IV | 2004-C06-007 | Urine | 39 | 8   | >16 | <=0.5 | 8   | <=0.5 | 8   | 0.25   |
| IV | 2004-C06-008 | Blood | 73 | <=2 | >16 | 4     | >16 | 16    | >16 | 1      |
| IV | 2004-C06-016 | Blood | 70 | <=2 | >16 | 8     | 16  | 2     | >16 | >2     |
| IV | 2004-C06-018 | Urine | 16 | <=2 | >16 | <=0.5 | 16  | <=0.5 | 8   | 0.25   |
| IV | 2004-C06-019 | Urine | 84 | <=2 | >16 | >16   | 16  | 4     | >16 | >2     |
| IV | 2004-C06-021 | Urine | 83 | <=2 | 2   | <=0.5 | 4   | <=0.5 | <=2 | <=0.03 |
| IV | 2004-C06-024 | Urine | 80 | <=2 | >16 | <=0.5 | 4   | <=0.5 | <=2 | 0.12   |
| IV | 2004-C06-026 | Urine | 59 | <=2 | >16 | <=0.5 | 16  | <=0.5 | 16  | <=0.03 |
| IV | 2004-C06-030 | Other | 79 | 4   | 8   | <=0.5 | 8   | <=0.5 | <=2 | 0.5    |
| IV | 2004-C06-032 | Urine | 8  | <=2 | >16 | <=0.5 | 8   | <=0.5 | <=2 | <=0.03 |
| IV | 2004-C06-034 | Urine | 82 | <=2 | >16 | <=0.5 | 8   | <=0.5 | 4   | 0.25   |
| IV | 2004-C06-037 | Blood | 70 | <=2 | >16 | <=0.5 | 8   | <=0.5 | 4   | <=0.03 |
| IV | 2004-C06-038 | Urine | 80 | <=2 | >16 | <=0.5 | 8   | <=0.5 | 4   | 0.25   |
| IV | 2004-C06-045 | Urine | 76 | 4   | >16 | >16   | >16 | >16   | >16 | >2     |
| IV | 2004-C07-002 | Urine | 75 | <=2 | 2   | <=0.5 | 4   | <=0.5 | <=2 | 0.12   |
| IV | 2004-C07-005 | Urine | 4  | 4   | >16 | <=0.5 | 8   | <=0.5 | 4   | 0.5    |
| IV | 2004-C07-006 | Urine | 35 | <=2 | >16 | <=0.5 | 8   | <=0.5 | 8   | 0.5    |
| IV | 2004-C07-010 | Urine | 50 | <=2 | >16 | <=0.5 | 8   | <=0.5 | 4   | 0.5    |
| IV | 2004-C07-011 | Urine | 92 | 4   | 4   | <=0.5 | 4   | <=0.5 | <=2 | 0.5    |
| IV | 2004-C07-013 | Urine | 28 | <=2 | >16 | <=0.5 | 8   | <=0.5 | <=2 | <=0.03 |
| IV | 2004-C07-014 | Urine | 84 | 8   | >16 | <=0.5 | 8   | <=0.5 | <=2 | 0.12   |
| IV | 2004-N16-003 | Other | 19 | <=2 | 4   | <=0.5 | 4   | <=0.5 | <=2 | <=0.03 |
| IV | 2004-N16-011 | Urine | 78 | <=2 | >16 | <=0.5 | 8   | <=0.5 | 4   | <=0.03 |
| IV | 2004-N16-015 | Urine | 76 | <=2 | >16 | <=0.5 | 16  | <=0.5 | 16  | >2     |
| IV | 2004-N16-017 | Other | 80 | <=2 | >16 | <=0.5 | >16 | <=0.5 | <=2 | <=0.03 |
| IV | 2004-N16-021 | Urine | 77 | <=2 | 4   | 1     | 4   | <=0.5 | <=2 | <=0.03 |
| IV | 2004-N16-035 | Urine | 83 | <=2 | >16 | <=0.5 | 4   | <=0.5 | 4   | 0.25   |
| IV | 2004-N16-038 | Urine | 18 | <=2 | 8   | <=0.5 | 4   | <=0.5 | <=2 | <=0.03 |
| IV | 2004-N16-042 | Urine | 79 | <=2 | >16 | <=0.5 | 8   | <=0.5 | <=2 | 0.25   |
| IV | 2004-N16-049 | Other | 78 | >32 | >16 | >16   | >16 | >16   | >16 | >2     |
| IV | 2004-N16-050 | Other | 33 | <=2 | >16 | <=0.5 | 8   | <=0.5 | 4   | <=0.03 |
| IV | 2004-N16-201 | Blood | 53 | <=2 | 4   | <=0.5 | 4   | <=0.5 | <=2 | <=0.03 |
| IV | 2004-N16-210 | Blood | 82 | <=2 | >16 | <=0.5 | 16  | <=0.5 | 8   | 0.25   |
| IV | 2004-N16-212 | Blood | 78 | <=2 | 2   | <=0.5 | 4   | <=0.5 | <=2 | <=0.03 |
| IV | 2004-N16-213 | Blood | 71 | <=2 | >16 | <=0.5 | 8   | <=0.5 | <=2 | 1      |
| IV | 2004-N16-214 | Blood | 56 | <=2 | >16 | <=0.5 | 8   | <=0.5 | 8   | 2      |
| IV | 2004-N16-216 | Blood | 49 | <=2 | 2   | <=0.5 | 4   | <=0.5 | <=2 | 0.12   |
| IV | 2004-N17-004 | Urine | 26 | <=2 | <=1 | <=0.5 | 2   | <=0.5 | <=2 | <=0.03 |
| IV | 2004-N17-005 | Urine | 78 | <=2 | 4   | <=0.5 | 4   | <=0.5 | <=2 | <=0.03 |
| IV | 2004-N17-006 | Urine | 33 | <=2 | >16 | <=0.5 | 8   | <=0.5 | <=2 | 0.12   |
| IV | 2004-N17-010 | Urine | 70 | 4   | >16 | <=0.5 | 8   | <=0.5 | <=2 | <=0.03 |
| IV | 2004-N17-011 | Urine | 27 | 4   | 4   | <=0.5 | 4   | <=0.5 | 4   | <=0.03 |
| IV | 2004-N17-012 | Urine | 76 | 4   | >16 | <=0.5 | 8   | <=0.5 | 4   | 0.25   |
| IV | 2004-N17-017 | Other | 82 | <=2 | >16 | <=0.5 | 8   | <=0.5 | 8   | 0.25   |
| IV | 2004-N17-024 | Urine | 26 | <=2 | >16 | <=0.5 | 8   | <=0.5 | <=2 | <=0.03 |
| IV | 2004-N17-025 | Urine | 90 | <=2 | 8   | <=0.5 | 16  | <=0.5 | <=2 | <=0.03 |
| IV | 2004-N17-028 | Urine | 20 | <=2 | >16 | <=0.5 | 8   | <=0.5 | <=2 | >2     |
| IV | 2004-N17-029 | Urine | 57 | 4   | 2   | <=0.5 | 2   | <=0.5 | <=2 | <=0.03 |
| IV | 2004-N17-030 | Urine | 19 | 4   | >16 | <=0.5 | 8   | <=0.5 | 4   | 0.12   |
| IV | 2004-N17-033 | Urine | 64 | 4   | >16 | <=0.5 | 8   | <=0.5 | <=2 | 0.25   |
| IV | 2004-N17-036 | Urine | 26 | 4   | 4   | <=0.5 | 4   | <=0.5 | <=2 | <=0.03 |
| IV | 2004-N17-039 | Urine | 24 | <=2 | >16 | <=0.5 | 8   | <=0.5 | 4   | <=0.03 |
| IV | 2004-N17-042 | Urine | 78 | 4   | >16 | <=0.5 | 8   | <=0.5 | <=2 | <=0.03 |
| IV | 2004-N17-150 | Urine | 67 | <=2 | >16 | <=0.5 | 16  | <=0.5 | >16 | >2     |
| IV | 2004-N17-205 | Blood | 76 | 4   | 8   | <=0.5 | 4   | <=0.5 | 4   | <=0.03 |

|    |              |       |    |     |     |       |     |       |     |        |
|----|--------------|-------|----|-----|-----|-------|-----|-------|-----|--------|
| IV | 2004-N19-002 | Urine | 62 | 4   | >16 | <=0.5 | 8   | <=0.5 | 4   | <=0.03 |
| IV | 2004-N19-003 | Urine | 82 | 4   | 2   | <=0.5 | 4   | <=0.5 | 16  | <=0.03 |
| IV | 2004-N19-004 | Urine | 77 | 16  | <=1 | <=0.5 | 1   | <=0.5 | 4   | 0.12   |
| IV | 2004-N19-006 | Blood | 78 | 8   | >16 | <=0.5 | 8   | <=0.5 | 4   | <=0.03 |
| IV | 2004-N19-012 | Blood | 83 | 4   | >16 | <=0.5 | 8   | <=0.5 | 8   | 0.12   |
| IV | 2004-N19-013 | Blood | 70 | <=2 | >16 | <=0.5 | 8   | <=0.5 | <=2 | <=0.03 |
| IV | 2004-N19-014 | Urine | 78 | <=2 | >16 | <=0.5 | 8   | <=0.5 | <=2 | 0.25   |
| IV | 2004-N19-018 | Urine | 73 | <=2 | >16 | <=0.5 | 8   | <=0.5 | 4   | <=0.03 |
| IV | 2004-N19-021 | Urine | 50 | <=2 | >16 | <=0.5 | 8   | <=0.5 | <=2 | 0.5    |
| IV | 2004-N19-022 | Urine | 73 | 4   | >16 | <=0.5 | 8   | <=0.5 | 8   | >2     |
| IV | 2004-N19-024 | Urine | 83 | <=2 | 4   | <=0.5 | 4   | <=0.5 | <=2 | <=0.03 |
| IV | 2004-N19-025 | Urine | 26 | 8   | >16 | <=0.5 | 8   | <=0.5 | 4   | <=0.03 |
| IV | 2004-N19-027 | Urine | 65 | <=2 | >16 | <=0.5 | 8   | <=0.5 | 8   | 0.12   |
| IV | 2004-N19-031 | Urine | 20 | <=2 | >16 | <=0.5 | 8   | <=0.5 | <=2 | <=0.03 |
| IV | 2004-N19-032 | Urine | 36 | <=2 | 4   | <=0.5 | 4   | <=0.5 | <=2 | <=0.03 |
| IV | 2004-N19-036 | Urine | 91 | 4   | >16 | <=0.5 | 4   | <=0.5 | 4   | 0.12   |
| IV | 2004-N19-037 | Urine | 84 | 4   | 16  | <=0.5 | 4   | <=0.5 | 8   | 2      |
| IV | 2004-N19-040 | Urine | 52 | <=2 | >16 | <=0.5 | 8   | <=0.5 | <=2 | 0.25   |
| IV | 2004-N19-041 | Urine | 80 | <=2 | >16 | <=0.5 | 8   | <=0.5 | 8   | >2     |
| IV | 2004-N19-045 | Urine | 27 | 8   | >16 | <=0.5 | 8   | <=0.5 | <=2 | 0.25   |
| IV | 2004-N19-049 | Urine | 26 | 8   | >16 | <=0.5 | 8   | 1     | 8   | 1      |
| IV | 2004-N19-205 | Blood | 81 | >32 | >16 | >16   | 16  | 2     | >16 | >2     |
| IV | 2004-N19-216 | Blood | 72 | <=2 | >16 | <=0.5 | 8   | <=0.5 | <=2 | <=0.03 |
| IV | 2004-N19-217 | Blood | 70 | 4   | >16 | <=0.5 | 8   | <=0.5 | 4   | >2     |
| IV | 2004-N19-218 | Blood | 68 | <=2 | >16 | <=0.5 | 16  | <=0.5 | 8   | 0.25   |
| IV | 2004-C08-002 | Other | 52 | <=2 | >16 | 8     | >16 | 16    | >16 | 1      |
| IV | 2004-C08-007 | Urine | 56 | <=2 | <=1 | <=0.5 | 1   | <=0.5 | <=2 | <=0.03 |
| IV | 2004-C08-012 | Urine | 77 | <=2 | >16 | <=0.5 | 8   | <=0.5 | <=2 | 0.25   |
| IV | 2004-C08-014 | Urine | 76 | 4   | >16 | <=0.5 | 8   | <=0.5 | 4   | <=0.03 |
| IV | 2004-C08-017 | Other | 63 | <=2 | <=1 | <=0.5 | 2   | <=0.5 | <=2 | <=0.03 |
| IV | 2004-C08-022 | Urine | 91 | 8   | >16 | <=0.5 | 8   | <=0.5 | 8   | <=0.03 |
| IV | 2004-C08-031 | Urine | 49 | >32 | >16 | 16    | >16 | 4     | >16 | >2     |
| IV | 2004-C08-041 | Other | 30 | 4   | 4   | <=0.5 | 4   | <=0.5 | <=2 | <=0.03 |
| IV | 2004-C08-044 | Other | 17 | <=2 | >16 | <=0.5 | 8   | <=0.5 | <=2 | <=0.03 |
| IV | 2004-C08-202 | Blood | 77 | <=2 | >16 | <=0.5 | 16  | <=0.5 | 8   | >2     |
| IV | 2004-C08-205 | Blood | 47 | <=2 | >16 | <=0.5 | 16  | <=0.5 | 4   | <=0.03 |
| IV | 2004-S11-003 | Urine | 69 | <=2 | >16 | <=0.5 | 8   | <=0.5 | <=2 | <=0.03 |
| IV | 2004-S11-013 | Urine | 71 | <=2 | >16 | <=0.5 | 8   | <=0.5 | 4   | 0.25   |
| IV | 2004-S11-014 | Urine | 45 | 4   | 4   | <=0.5 | 4   | <=0.5 | <=2 | <=0.03 |
| IV | 2004-S11-015 | Urine | 78 | <=2 | >16 | <=0.5 | 8   | <=0.5 | 4   | 0.25   |
| IV | 2004-S11-016 | Urine | 67 | 4   | >16 | <=0.5 | 8   | <=0.5 | 4   | 0.06   |
| IV | 2004-S11-025 | Urine | 85 | 4   | 4   | <=0.5 | 4   | <=0.5 | <=2 | <=0.03 |
| IV | 2004-S11-030 | Urine | 87 | <=2 | 2   | <=0.5 | 4   | <=0.5 | <=2 | 0.12   |
| IV | 2004-S11-031 | Urine | 78 | 4   | 4   | <=0.5 | 4   | <=0.5 | <=2 | <=0.03 |
| IV | 2004-S11-036 | Urine | 64 | 4   | >16 | <=0.5 | 8   | <=0.5 | 4   | <=0.03 |
| IV | 2004-S11-039 | Urine | 75 | <=2 | 4   | <=0.5 | 8   | <=0.5 | <=2 | <=0.03 |
| IV | 2004-S11-041 | Urine | 65 | <=2 | >16 | <=0.5 | 16  | <=0.5 | 16  | <=0.03 |
| IV | 2004-S11-042 | Urine | 26 | <=2 | >16 | <=0.5 | 8   | <=0.5 | <=2 | >2     |
| IV | 2004-S11-044 | Urine | 59 | 4   | >16 | <=0.5 | 8   | <=0.5 | 4   | <=0.03 |
| IV | 2004-S11-045 | Urine | 27 | <=2 | >16 | <=0.5 | 8   | <=0.5 | 4   | 0.12   |
| IV | 2004-S11-046 | Urine | 32 | <=2 | >16 | <=0.5 | 16  | <=0.5 | 16  | <=0.03 |
| IV | 2004-S11-047 | Urine | 73 | <=2 | 4   | <=0.5 | 4   | <=0.5 | 4   | 0.25   |
| IV | 2004-S11-193 | Urine | 4  | 4   | >16 | <=0.5 | 16  | <=0.5 | >16 | 0.25   |
| IV | 2004-S11-203 | Blood | 37 | <=2 | >16 | <=0.5 | 8   | <=0.5 | 4   | 0.25   |
| IV | 2004-S11-206 | Blood | 79 | <=2 | >16 | <=0.5 | 8   | <=0.5 | 4   | 0.25   |
| IV | 2004-S11-207 | Blood | 77 | 4   | 2   | <=0.5 | 4   | <=0.5 | <=2 | <=0.03 |
| IV | 2004-N21-017 | Urine | 50 | <=2 | >16 | 8     | >16 | 16    | >16 | 0.25   |
| IV | 2004-N21-022 | Urine | 1  | <=2 | >16 | <=0.5 | 16  | <=0.5 | >16 | <=0.03 |
| IV | 2004-N21-029 | Urine | 90 | <=2 | 2   | <=0.5 | 4   | <=0.5 | <=2 | <=0.03 |
| IV | 2004-N21-033 | Urine | 68 | 4   | >16 | <=0.5 | 8   | <=0.5 | <=2 | <=0.03 |
| IV | 2004-N21-037 | Urine | 46 | <=2 | 2   | <=0.5 | 2   | <=0.5 | <=2 | <=0.03 |

|    |              |       |    |     |     |       |     |       |     |        |
|----|--------------|-------|----|-----|-----|-------|-----|-------|-----|--------|
| IV | 2004-N21-042 | Urine | 4  | <=2 | >16 | <=0.5 | 8   | <=0.5 | 4   | 1      |
| IV | 2004-N21-050 | Urine | 25 | <=2 | 2   | <=0.5 | 2   | <=0.5 | <=2 | <=0.03 |
| IV | 2004-N21-196 | Urine | 1  | <=2 | >16 | <=0.5 | 8   | <=0.5 | 8   | <=0.03 |
| IV | 2004-N21-197 | Urine | 0  | 4   | >16 | <=0.5 | 8   | <=0.5 | 4   | <=0.03 |
| IV | 2004-N21-206 | Blood | 68 | 4   | >16 | <=0.5 | 8   | <=0.5 | 4   | <=0.03 |
| IV | 2004-N21-209 | Blood | 87 | 4   | >16 | <=0.5 | 8   | <=0.5 | 8   | <=0.03 |
| IV | 2004-C09-002 | Urine | 82 | <=2 | >16 | <=0.5 | 8   | <=0.5 | 4   | >2     |
| IV | 2004-C09-004 | Urine | 80 | <=2 | >16 | <=0.5 | 8   | <=0.5 | 4   | 0.25   |
| IV | 2004-C09-006 | Urine | 5  | <=2 | >16 | 16    | >16 | >16   | >16 | >2     |
| IV | 2004-C09-020 | Urine | 71 | 8   | >16 | <=0.5 | 16  | <=0.5 | 8   | 0.5    |
| IV | 2004-C09-022 | Urine | 36 | <=2 | 2   | <=0.5 | 4   | <=0.5 | <=2 | <=0.03 |
| IV | 2004-C09-023 | Urine | 67 | <=2 | 4   | <=0.5 | 4   | <=0.5 | 4   | <=0.03 |
| IV | 2004-C09-033 | Other | 65 | <=2 | >16 | <=0.5 | 8   | <=0.5 | 4   | >2     |
| IV | 2004-C09-037 | Urine | 5  | <=2 | >16 | <=0.5 | 8   | <=0.5 | 4   | >2     |
| IV | 2004-C09-040 | Urine | 68 | <=2 | >16 | 2     | >16 | 4     | >16 | >2     |
| IV | 2004-C09-041 | Urine | 37 | <=2 | >16 | <=0.5 | >16 | <=0.5 | 8   | >2     |
| IV | 2004-C09-045 | Other | 57 | <=2 | >16 | <=0.5 | 8   | <=0.5 | 8   | >2     |
| IV | 2004-C09-047 | Urine | 25 | <=2 | >16 | <=0.5 | 8   | <=0.5 | 4   | <=0.03 |
| IV | 2004-C09-048 | Urine | 79 | >32 | >16 | 16    | >16 | >16   | >16 | <=0.03 |
| IV | 2004-C09-049 | Urine | 1  | <=2 | >16 | <=0.5 | 16  | <=0.5 | <=2 | <=0.03 |
| IV | 2004-C09-206 | Blood | 73 | 4   | >16 | <=0.5 | 8   | <=0.5 | <=2 | <=0.03 |
| IV | 2004-C09-210 | Blood | 41 | <=2 | >16 | <=0.5 | 8   | <=0.5 | <=2 | <=0.03 |
| IV | 2004-C10-003 | Urine | 87 | 4   | >16 | <=0.5 | 8   | <=0.5 | 4   | <=0.03 |
| IV | 2004-C10-004 | Urine | 70 | <=2 | >16 | <=0.5 | 8   | <=0.5 | <=2 | 0.5    |
| IV | 2004-C10-008 | Blood | 57 | <=2 | >16 | <=0.5 | 8   | <=0.5 | 4   | <=0.03 |
| IV | 2004-C10-012 | Urine | 70 | <=2 | >16 | <=0.5 | 8   | <=0.5 | <=2 | 0.5    |
| IV | 2004-C10-013 | Urine | 58 | 4   | 4   | <=0.5 | 4   | <=0.5 | <=2 | <=0.03 |
| IV | 2004-C10-017 | Urine | 78 | <=2 | >16 | 16    | >16 | >16   | >16 | >2     |
| IV | 2004-C10-018 | Urine | 21 | 4   | <=1 | <=0.5 | 2   | <=0.5 | <=2 | <=0.03 |
| IV | 2004-C10-019 | Urine | 78 | <=2 | >16 | <=0.5 | 8   | <=0.5 | 4   | <=0.03 |
| IV | 2004-C10-020 | Urine | 80 | 8   | >16 | >16   | >16 | >16   | >16 | >2     |
| IV | 2004-C10-024 | Blood | 61 | <=2 | >16 | 8     | >16 | 16    | >16 | 0.5    |
| IV | 2004-C10-025 | Urine | 77 | <=2 | >16 | <=0.5 | 16  | <=0.5 | 16  | <=0.03 |
| IV | 2004-C10-031 | Urine | 67 | <=2 | 4   | <=0.5 | 8   | <=0.5 | 8   | 0.12   |
| IV | 2004-C10-032 | Urine | 65 | 4   | >16 | <=0.5 | 8   | <=0.5 | 8   | <=0.03 |
| IV | 2004-C10-036 | Urine | 45 | 4   | >16 | <=0.5 | 16  | <=0.5 | 16  | <=0.03 |
| IV | 2004-C10-037 | Urine | 49 | 4   | >16 | <=0.5 | 16  | <=0.5 | 16  | <=0.03 |
| IV | 2004-C10-038 | Blood | 35 | <=2 | >16 | <=0.5 | 8   | <=0.5 | 4   | >2     |
| IV | 2004-C10-039 | Urine | 82 | <=2 | >16 | <=0.5 | 8   | <=0.5 | <=2 | 0.25   |
| IV | 2004-C10-040 | Urine | 35 | 4   | >16 | <=0.5 | 16  | <=0.5 | 4   | <=0.03 |
| IV | 2004-C10-041 | Urine | 87 | <=2 | >16 | <=0.5 | 16  | <=0.5 | 4   | <=0.03 |
| IV | 2004-C10-045 | Urine | 63 | 4   | >16 | <=0.5 | 8   | <=0.5 | 8   | >2     |
| IV | 2004-C10-046 | Urine | 63 | 4   | >16 | <=0.5 | 8   | <=0.5 | <=2 | <=0.03 |
| IV | 2004-C10-047 | Blood | 49 | 4   | 2   | <=0.5 | 4   | <=0.5 | <=2 | <=0.03 |
| IV | 2004-C10-192 | Urine | 1  | 4   | >16 | <=0.5 | 8   | <=0.5 | 4   | <=0.03 |
| IV | 2004-C10-205 | Blood | 75 | 8   | >16 | <=0.5 | 8   | <=0.5 | 4   | 0.25   |
| IV | 2004-C10-219 | Blood | 92 | <=2 | >16 | <=0.5 | 8   | <=0.5 | <=2 | <=0.03 |
| IV | 2004-E04-003 | Urine | 85 | 4   | >16 | <=0.5 | 16  | <=0.5 | 16  | 0.25   |
| IV | 2004-E04-004 | Blood | 66 | 4   | 4   | <=0.5 | 4   | <=0.5 | <=2 | <=0.03 |
| IV | 2004-E04-009 | Urine | 34 | 16  | 4   | <=0.5 | 4   | <=0.5 | <=2 | <=0.03 |
| IV | 2004-E04-015 | Blood | 56 | <=2 | >16 | <=0.5 | 8   | <=0.5 | 4   | 0.25   |
| IV | 2004-E04-020 | Urine | 42 | <=2 | 2   | <=0.5 | 4   | <=0.5 | 4   | <=0.03 |
| IV | 2004-E04-027 | Blood | 53 | <=2 | 4   | <=0.5 | 4   | <=0.5 | 4   | <=0.03 |
| IV | 2004-E04-031 | Urine | 22 | <=2 | >16 | <=0.5 | 16  | <=0.5 | >16 | <=0.03 |
| IV | 2004-E04-032 | Blood | 74 | 4   | >16 | <=0.5 | 8   | <=0.5 | <=2 | <=0.03 |
| IV | 2004-E04-036 | Urine | 70 | <=2 | >16 | <=0.5 | 8   | <=0.5 | <=2 | >2     |
| IV | 2004-E04-037 | Urine | 47 | <=2 | <=1 | <=0.5 | 2   | <=0.5 | <=2 | <=0.03 |
| IV | 2004-E04-039 | Urine | 77 | <=2 | 4   | <=0.5 | 4   | <=0.5 | <=2 | <=0.03 |
| IV | 2004-E04-043 | Urine | 65 | <=2 | >16 | <=0.5 | 8   | <=0.5 | <=2 | <=0.03 |
| IV | 2004-E04-046 | Urine | 81 | <=2 | >16 | <=0.5 | 8   | <=0.5 | 4   | <=0.03 |
| IV | 2004-E04-048 | Urine | 79 | 4   | <=1 | <=0.5 | 2   | <=0.5 | <=2 | <=0.03 |

|    |              |       |    |     |     |       |     |       |     |        |
|----|--------------|-------|----|-----|-----|-------|-----|-------|-----|--------|
| IV | 2004-E04-055 | Urine | 71 | 8   | >16 | <=0.5 | 8   | <=0.5 | 4   | >2     |
| IV | 2004-E04-057 | Other | 53 | 8   | >16 | >16   | >16 | >16   | >16 | <=0.03 |
| IV | 2004-E04-068 | Other | 62 | 8   | >16 | <=0.5 | 16  | <=0.5 | 4   | 0.12   |
| IV | 2004-E04-069 | Urine | 48 | 4   | >16 | 16    | 8   | 4     | >16 | 0.25   |
| IV | 2004-E04-073 | Blood | 44 | 8   | >16 | <=0.5 | 8   | <=0.5 | 4   | >2     |
| IV | 2004-E04-079 | Other | 80 | 8   | >16 | 16    | >16 | >16   | >16 | >2     |
| IV | 2004-E04-081 | Urine | 62 | 4   | >16 | <=0.5 | 8   | <=0.5 | <=2 | 0.12   |
| IV | 2004-E04-084 | Blood | 51 | <=2 | 4   | <=0.5 | 4   | <=0.5 | <=2 | 0.25   |
| IV | 2004-E04-093 | Other | 81 | <=2 | >16 | <=0.5 | 16  | <=0.5 | 16  | <=0.03 |
| IV | 2004-E04-097 | Urine | 61 | 4   | >16 | <=0.5 | 8   | <=0.5 | 4   | >2     |
| IV | 2004-E04-100 | Other | 77 | <=2 | >16 | <=0.5 | 16  | <=0.5 | <=2 | >2     |
| IV | 2004-E04-101 | Urine | 73 | <=2 | >16 | <=0.5 | 16  | <=0.5 | 8   | 2      |
| IV | 2004-E04-107 | Urine | 60 | <=2 | 4   | <=0.5 | 4   | <=0.5 | <=2 | >2     |
| IV | 2004-E04-113 | Urine | 75 | 4   | >16 | <=0.5 | 8   | <=0.5 | 4   | 0.25   |
| IV | 2004-E04-114 | Other | 37 | <=2 | >16 | <=0.5 | 8   | <=0.5 | 4   | 0.25   |
| IV | 2004-E04-120 | Other | 63 | 4   | >16 | <=0.5 | 16  | <=0.5 | 8   | >2     |
| IV | 2004-E04-122 | Urine | 61 | 8   | 4   | <=0.5 | 4   | <=0.5 | 8   | <=0.03 |
| IV | 2004-E04-125 | Urine | 38 | 4   | 4   | <=0.5 | 8   | <=0.5 | <=2 | >2     |
| IV | 2004-E04-127 | Other | 69 | <=2 | >16 | <=0.5 | 16  | <=0.5 | 16  | >2     |
| IV | 2004-E04-128 | Blood | 79 | 8   | >16 | <=0.5 | 8   | <=0.5 | 4   | <=0.03 |
| IV | 2004-E04-133 | Blood | 50 | <=2 | 2   | <=0.5 | 4   | <=0.5 | <=2 | <=0.03 |
| IV | 2004-E04-135 | Urine | 36 | 4   | >16 | <=0.5 | 8   | <=0.5 | 16  | >2     |
| IV | 2004-E04-137 | Urine | 73 | 4   | >16 | <=0.5 | >16 | <=0.5 | >16 | <=0.03 |
| IV | 2004-E04-139 | Urine | 52 | <=2 | >16 | >16   | >16 | >16   | >16 | >2     |
| IV | 2004-E04-151 | Urine | 73 | 4   | 4   | <=0.5 | 8   | <=0.5 | <=2 | <=0.03 |
| IV | 2004-E04-154 | Blood | 49 | <=2 | 4   | <=0.5 | 4   | <=0.5 | <=2 | <=0.03 |
| IV | 2004-E04-155 | Other | 60 | <=2 | 2   | <=0.5 | 4   | <=0.5 | <=2 | <=0.03 |
| IV | 2004-E04-161 | Blood | 16 | <=2 | >16 | 16    | >16 | >16   | >16 | >2     |
| IV | 2004-E04-170 | Other | 72 | <=2 | >16 | 4     | >16 | 16    | >16 | 1      |
| IV | 2004-E04-178 | Urine | 77 | <=2 | >16 | <=0.5 | 8   | <=0.5 | <=2 | <=0.03 |
| IV | 2004-E04-195 | Urine | 0  | <=2 | >16 | <=0.5 | 8   | <=0.5 | 4   | 1      |
| IV | 2004-E04-202 | Blood | 49 | 4   | 2   | <=0.5 | 4   | <=0.5 | <=2 | <=0.03 |
| IV | 2004-E04-207 | Blood | 26 | <=2 | 4   | <=0.5 | 4   | <=0.5 | <=2 | <=0.03 |
| IV | 2004-E04-210 | Blood | 76 | <=2 | >16 | <=0.5 | 8   | <=0.5 | 4   | 0.12   |
| IV | 2004-E04-212 | Blood | 77 | <=2 | 4   | <=0.5 | 4   | <=0.5 | <=2 | <=0.03 |
| IV | 2004-E04-214 | Blood | 77 | <=2 | 2   | <=0.5 | 4   | <=0.5 | 4   | <=0.03 |
| IV | 2004-E04-217 | Blood | 73 | <=2 | >16 | <=0.5 | 16  | <=0.5 | 4   | 0.5    |
| IV | 2004-E04-220 | Blood | 70 | <=2 | 4   | <=0.5 | 4   | <=0.5 | <=2 | 0.25   |
| V  | 2006-S01-001 | Urine | 69 | <=2 | >16 | <=0.5 | 4   | <=0.5 | <=2 | 1      |
| V  | 2006-S01-002 | Urine | 22 | <=2 | >16 | <=0.5 | 8   | <=0.5 | <=2 | <=0.03 |
| V  | 2006-S01-003 | Urine | 77 | <=2 | >16 | <=0.5 | 8   | <=0.5 | 4   | <=0.03 |
| V  | 2006-S01-004 | Urine | 64 | <=2 | >16 | <=0.5 | 8   | <=0.5 | 4   | 0.12   |
| V  | 2006-S01-007 | Urine | 81 | <=2 | >16 | <=0.5 | 8   | <=0.5 | <=2 | 0.12   |
| V  | 2006-S01-008 | Urine | 80 | 4   | >16 | <=0.5 | 8   | <=0.5 | <=2 | <=0.03 |
| V  | 2006-S01-010 | Urine | 51 | <=2 | >16 | <=0.5 | 8   | <=0.5 | 4   | <=0.03 |
| V  | 2006-S01-014 | Urine | 70 | 4   | >16 | <=0.5 | 8   | <=0.5 | 4   | >2     |
| V  | 2006-S01-019 | Urine | 75 | <=2 | >16 | <=0.5 | 16  | <=0.5 | >16 | <=0.03 |
| V  | 2006-S01-021 | Urine | 49 | 8   | >16 | <=0.5 | 16  | <=0.5 | 16  | >2     |
| V  | 2006-S01-025 | Urine | 76 | <=2 | >16 | <=0.5 | 8   | <=0.5 | 4   | 0.12   |
| V  | 2006-S01-028 | Urine | 78 | <=2 | 4   | <=0.5 | 4   | <=0.5 | <=2 | <=0.03 |
| V  | 2006-S01-029 | Urine | 21 | <=2 | >16 | <=0.5 | 8   | <=0.5 | <=2 | <=0.03 |
| V  | 2006-S01-033 | Urine | 76 | 8   | >16 | <=0.5 | 8   | <=0.5 | 4   | 1      |
| V  | 2006-S01-036 | Urine | 68 | <=2 | >16 | <=0.5 | 8   | <=0.5 | 4   | 0.12   |
| V  | 2006-S01-041 | Urine | 41 | <=2 | >16 | <=0.5 | 8   | <=0.5 | 4   | <=0.03 |
| V  | 2006-S01-042 | Urine | 73 | 4   | >16 | <=0.5 | 8   | <=0.5 | 16  | >2     |
| V  | 2006-S01-046 | Urine | 80 | 4   | >16 | <=0.5 | 16  | <=0.5 | 16  | >2     |
| V  | 2006-S01-048 | Urine | 22 | <=2 | >16 | <=0.5 | 16  | <=0.5 | 8   | <=0.03 |
| V  | 2006-S01-050 | Urine | 68 | 4   | 4   | <=0.5 | 4   | <=0.5 | <=2 | <=0.03 |
| V  | 2006-S01-211 | Blood | 59 | <=2 | >16 | <=0.5 | >16 | <=0.5 | 8   | <=0.03 |
| V  | 2006-S01-217 | Blood | 76 | <=2 | >16 | <=0.5 | 16  | <=0.5 | 8   | 0.5    |
| V  | 2006-S01-218 | Blood | 76 | <=2 | >16 | <=0.5 | 16  | <=0.5 | 8   | >2     |

|   |              |       |    |     |     |       |     |       |     |        |
|---|--------------|-------|----|-----|-----|-------|-----|-------|-----|--------|
| V | 2006-S01-219 | Blood | 31 | <=2 | >16 | <=0.5 | 8   | <=0.5 | <=2 | <=0.03 |
| V | 2006-C01-002 | Urine | 66 | <=2 | >16 | <=0.5 | 8   | <=0.5 | <=2 | <=0.03 |
| V | 2006-C01-003 | Urine | 5  | <=2 | >16 | <=0.5 | 16  | <=0.5 | 8   | 0.12   |
| V | 2006-C01-004 | Urine | 26 | <=2 | 2   | <=0.5 | 2   | <=0.5 | <=2 | <=0.03 |
| V | 2006-C01-008 | Urine | 52 | <=2 | >16 | <=0.5 | 16  | <=0.5 | >16 | <=0.03 |
| V | 2006-C01-009 | Urine | 76 | 4   | >16 | <=0.5 | 8   | <=0.5 | <=2 | 0.25   |
| V | 2006-C01-014 | Blood | 74 | <=2 | 2   | <=0.5 | 4   | <=0.5 | <=2 | 0.12   |
| V | 2006-C01-015 | Blood | 65 | <=2 | >16 | <=0.5 | 8   | <=0.5 | 4   | <=0.03 |
| V | 2006-C01-016 | Blood | 57 | <=2 | 2   | <=0.5 | 1   | <=0.5 | <=2 | <=0.03 |
| V | 2006-C01-018 | Urine | 73 | 4   | 2   | <=0.5 | 4   | <=0.5 | <=2 | <=0.03 |
| V | 2006-C01-019 | Urine | 49 | <=2 | >16 | <=0.5 | 8   | <=0.5 | 8   | 0.12   |
| V | 2006-C01-021 | Urine | 1  | 4   | >16 | <=0.5 | 8   | <=0.5 | 4   | 0.25   |
| V | 2006-C01-024 | Urine | 83 | <=2 | >16 | <=0.5 | 8   | <=0.5 | <=2 | 0.25   |
| V | 2006-C01-026 | Urine | 5  | <=2 | >16 | <=0.5 | 8   | <=0.5 | 8   | <=0.03 |
| V | 2006-C01-029 | Other | 70 | 8   | 4   | <=0.5 | 8   | <=0.5 | <=2 | <=0.03 |
| V | 2006-C01-030 | Other | 60 | <=2 | >16 | <=0.5 | 8   | <=0.5 | 8   | <=0.03 |
| V | 2006-C01-034 | Blood | 69 | <=2 | >16 | <=0.5 | 8   | <=0.5 | 8   | <=0.03 |
| V | 2006-C01-037 | Urine | 50 | 4   | >16 | <=0.5 | 16  | <=0.5 | >16 | <=0.03 |
| V | 2006-C01-039 | Urine | 4  | 4   | 2   | <=0.5 | 4   | <=0.5 | <=2 | <=0.03 |
| V | 2006-C01-040 | Urine | 83 | <=2 | 2   | <=0.5 | 2   | <=0.5 | <=2 | <=0.03 |
| V | 2006-C01-041 | Urine | 78 | 4   | >16 | 8     | >16 | 16    | >16 | 0.25   |
| V | 2006-C01-048 | Blood | 77 | <=2 | 4   | <=0.5 | 4   | <=0.5 | 4   | <=0.03 |
| V | 2006-C01-049 | Urine | 53 | <=2 | >16 | <=0.5 | 8   | <=0.5 | 4   | <=0.03 |
| V | 2006-C01-050 | Urine | 44 | <=2 | 4   | <=0.5 | 4   | <=0.5 | <=2 | 0.12   |
| V | 2006-C01-202 | Blood | 77 | <=2 | >16 | <=0.5 | 8   | <=0.5 | <=2 | <=0.03 |
| V | 2006-C02-002 | Urine | 80 | 4   | >16 | 2     | >16 | 16    | >16 | <=0.03 |
| V | 2006-C02-008 | Urine | 68 | 4   | >16 | 4     | >16 | 16    | >16 | <=0.03 |
| V | 2006-C02-009 | Urine | 57 | 4   | >16 | <=0.5 | 8   | <=0.5 | 4   | 0.25   |
| V | 2006-C02-010 | Urine | 63 | 4   | >16 | <=0.5 | 8   | <=0.5 | 4   | <=0.03 |
| V | 2006-C02-011 | Urine | 36 | <=2 | <=1 | <=0.5 | 4   | <=0.5 | <=2 | <=0.03 |
| V | 2006-C02-012 | Urine | 33 | <=2 | >16 | <=0.5 | 4   | <=0.5 | <=2 | <=0.03 |
| V | 2006-C02-027 | Other | 40 | 4   | >16 | <=0.5 | 4   | <=0.5 | <=2 | >2     |
| V | 2006-C02-028 | Urine | 77 | 4   | >16 | 8     | >16 | >16   | >16 | >2     |
| V | 2006-C02-032 | Urine | 36 | <=2 | >16 | <=0.5 | 8   | <=0.5 | 8   | 0.25   |
| V | 2006-C02-048 | Blood | 56 | <=2 | >16 | <=0.5 | 8   | <=0.5 | 4   | <=0.03 |
| V | 2006-C02-194 | Urine | 33 | 4   | >16 | <=0.5 | 8   | <=0.5 | 4   | <=0.03 |
| V | 2006-C02-206 | Blood | 27 | <=2 | >16 | <=0.5 | 8   | <=0.5 | <=2 | <=0.03 |
| V | 2006-C02-209 | Blood | 69 | <=2 | >16 | <=0.5 | 8   | <=0.5 | 8   | <=0.03 |
| V | 2006-C02-212 | Blood | 74 | <=2 | >16 | <=0.5 | 8   | <=0.5 | <=2 | 0.25   |
| V | 2006-C02-213 | Blood | 81 | 8   | >16 | <=0.5 | 8   | <=0.5 | 8   | 0.5    |
| V | 2006-C02-216 | Blood | 71 | 4   | >16 | <=0.5 | 8   | <=0.5 | <=2 | 0.25   |
| V | 2006-C02-218 | Blood | 85 | <=2 | <=1 | <=0.5 | 2   | <=0.5 | <=2 | <=0.03 |
| V | 2006-C04-003 | Urine | 49 | <=2 | 2   | <=0.5 | 4   | <=0.5 | <=2 | <=0.03 |
| V | 2006-C04-012 | Urine | 69 | <=2 | >16 | 4     | >16 | >16   | >16 | >2     |
| V | 2006-C04-019 | Urine | 45 | <=2 | >16 | <=0.5 | 8   | <=0.5 | <=2 | <=0.03 |
| V | 2006-C04-022 | Urine | 85 | <=2 | >16 | <=0.5 | 16  | <=0.5 | 16  | >2     |
| V | 2006-C04-032 | Urine | 77 | <=2 | 2   | <=0.5 | 2   | <=0.5 | <=2 | 0.25   |
| V | 2006-C04-192 | Urine | 8  | <=2 | >16 | <=0.5 | 16  | <=0.5 | 16  | <=0.03 |
| V | 2006-C04-201 | Blood | 50 | <=2 | >16 | <=0.5 | 16  | <=0.5 | 4   | >2     |
| V | 2006-C04-205 | Blood | 67 | <=2 | >16 | <=0.5 | 8   | <=0.5 | <=2 | <=0.03 |
| V | 2006-C04-208 | Blood | 62 | 4   | 4   | <=0.5 | 4   | <=0.5 | <=2 | <=0.03 |
| V | 2006-C04-213 | Blood | 40 | <=2 | >16 | <=0.5 | 8   | <=0.5 | <=2 | <=0.03 |
| V | 2006-C04-217 | Blood | 54 | <=2 | 4   | <=0.5 | 4   | <=0.5 | <=2 | <=0.03 |
| V | 2006-S05-001 | Urine | 49 | <=2 | >16 | <=0.5 | 16  | <=0.5 | 16  | <=0.03 |
| V | 2006-S05-007 | Urine | 99 | <=2 | >16 | 16    | >16 | >16   | >16 | >2     |
| V | 2006-S05-008 | Other | 43 | <=2 | >16 | <=0.5 | 8   | <=0.5 | 8   | <=0.03 |
| V | 2006-S05-014 | Urine | 58 | <=2 | 2   | <=0.5 | 2   | <=0.5 | <=2 | <=0.03 |
| V | 2006-S05-015 | Urine | 47 | 4   | >16 | <=0.5 | 16  | <=0.5 | 4   | <=0.03 |
| V | 2006-S05-016 | Urine | 81 | <=2 | >16 | <=0.5 | 16  | <=0.5 | 4   | >2     |
| V | 2006-S05-026 | Urine | 1  | 4   | >16 | <=0.5 | 8   | <=0.5 | 4   | <=0.03 |
| V | 2006-S05-030 | Other | 40 | <=2 | 4   | <=0.5 | 8   | <=0.5 | <=2 | <=0.03 |



|   |              |       |    |     |     |       |       |       |     |        |
|---|--------------|-------|----|-----|-----|-------|-------|-------|-----|--------|
| V | 2006-S05-032 | Urine | 36 | <=2 | >16 | <=0.5 | 16    | <=0.5 | 16  | 0.25   |
| V | 2006-S05-035 | Urine | 74 | 8   | >16 | <=0.5 | 16    | <=0.5 | 16  | 0.5    |
| V | 2006-S05-039 | Urine | 28 | <=2 | >16 | <=0.5 | 8     | <=0.5 | <=2 | <=0.03 |
| V | 2006-S05-041 | Urine | 21 | <=2 | 4   | <=0.5 | 4     | <=0.5 | <=2 | <=0.03 |
| V | 2006-S05-042 | Urine | 38 | <=2 | >16 | <=0.5 | 8     | <=0.5 | <=2 | <=0.03 |
| V | 2006-S05-043 | Urine | 44 | 4   | 2   | <=0.5 | 4     | <=0.5 | <=2 | 0.5    |
| V | 2006-S05-048 | Urine | 14 | 4   | 2   | <=0.5 | 4     | <=0.5 | <=2 | 0.5    |
| V | 2006-S05-050 | Blood | 67 | 4   | >16 | <=0.5 | 8     | <=0.5 | 4   | 0.12   |
| V | 2006-S05-193 | Urine | 0  | 8   | <=1 | <=0.5 | 2     | <=0.5 | <=2 | <=0.03 |
| V | 2006-S05-203 | Blood | 69 | <=2 | >16 | <=0.5 | 4     | <=0.5 | <=2 | <=0.03 |
| V | 2006-S05-204 | Blood | 82 | <=2 | >16 | <=0.5 | 8     | <=0.5 | <=2 | <=0.03 |
| V | 2006-S06-003 | Other | 57 | <=2 | >16 | <=0.5 | 4     | <=0.5 | <=2 | <=0.03 |
| V | 2006-S06-005 | Urine | 91 | 4   | 4   | <=0.5 | 4     | <=0.5 | <=2 | <=0.03 |
| V | 2006-S06-006 | Other | 58 | 4   | >16 | <=0.5 | 8     | <=0.5 | <=2 | <=0.03 |
| V | 2006-S06-007 | Urine | 6  | <=2 | >16 | <=0.5 | 8     | <=0.5 | <=2 | 0.12   |
| V | 2006-S06-009 | Urine | 22 | <=2 | >16 | <=0.5 | 8     | <=0.5 | 8   | <=0.03 |
| V | 2006-S06-010 | Urine | 72 | <=2 | >16 | <=0.5 | 16    | <=0.5 | 4   | 0.25   |
| V | 2006-S06-011 | Urine | 52 | 4   | >16 | <=0.5 | 4     | <=0.5 | <=2 | <=0.03 |
| V | 2006-S06-012 | Urine | 87 | <=2 | <=1 | <=0.5 | 1     | <=0.5 | <=2 | <=0.03 |
| V | 2006-S06-013 | Urine | 55 | <=2 | >16 | <=0.5 | 8     | <=0.5 | 4   | <=0.03 |
| V | 2006-S06-014 | Urine | 38 | 4   | >16 | <=0.5 | 16    | <=0.5 | 8   | <=0.03 |
| V | 2006-S06-015 | Other | 83 | <=2 | >16 | <=0.5 | 8     | <=0.5 | <=2 | <=0.03 |
| V | 2006-S06-016 | Blood | 86 | 4   | >16 | 16    | >16   | 8     | >16 | 1      |
| V | 2006-S06-024 | Urine | 23 | <=2 | >16 | <=0.5 | 8     | <=0.5 | <=2 | <=0.03 |
| V | 2006-S06-025 | Urine | 39 | <=2 | >16 | <=0.5 | 8     | <=0.5 | <=2 | 0.12   |
| V | 2006-S06-026 | Other | 81 | 4   | 4   | <=0.5 | 4     | <=0.5 | <=2 | <=0.03 |
| V | 2006-S06-029 | Urine | 60 | <=2 | >16 | <=0.5 | 4     | <=0.5 | <=2 | <=0.03 |
| V | 2006-S06-030 | Urine | 34 | 4   | >16 | <=0.5 | 8     | <=0.5 | 4   | <=0.03 |
| V | 2006-S06-031 | Other | 45 | 4   | >16 | <=0.5 | 8     | <=0.5 | 4   | <=0.03 |
| V | 2006-S06-035 | Other | 41 | <=2 | 4   | <=0.5 | 4     | <=0.5 | <=2 | <=0.03 |
| V | 2006-S06-037 | Urine | 33 | <=2 | >16 | <=0.5 | 8     | <=0.5 | 4   | 0.5    |
| V | 2006-S06-043 | Urine | 49 | 8   | 4   | <=0.5 | 4     | <=0.5 | <=2 | <=0.03 |
| V | 2006-S06-047 | Urine | 45 | 4   | 2   | <=0.5 | 4     | <=0.5 | <=2 | 0.25   |
| V | 2006-S06-212 | Blood | 31 | 4   | 2   | <=0.5 | 2     | <=0.5 | <=2 | <=0.03 |
| V | 2006-S07-002 | Blood | 62 | 4   | >16 | <=0.5 | 4     | <=0.5 | 4   | 0.5    |
| V | 2006-S07-003 | Urine | 8  | 4   | >16 | <=0.5 | 16    | <=0.5 | 8   | >2     |
| V | 2006-S07-004 | Urine | 64 | <=2 | >16 | <=0.5 | 16    | <=0.5 | 4   | 0.12   |
| V | 2006-S07-005 | Urine | 86 | <=2 | >16 | <=0.5 | 8     | <=0.5 | <=2 | <=0.03 |
| V | 2006-S07-007 | Urine | 1  | <=2 | >16 | <=0.5 | 16    | <=0.5 | 16  | <=0.03 |
| V | 2006-S07-011 | Urine | 43 | 4   | >16 | <=0.5 | 8     | <=0.5 | <=2 | <=0.03 |
| V | 2006-S07-012 | Urine | 56 | <=2 | >16 | <=0.5 | 16    | <=0.5 | 8   | 0.25   |
| V | 2006-S07-013 | Other | 75 | <=2 | >16 | <=0.5 | 8     | <=0.5 | 4   | >2     |
| V | 2006-S07-015 | Urine | 47 | <=2 | >16 | <=0.5 | 8     | <=0.5 | <=2 | 0.25   |
| V | 2006-S07-019 | Urine | 67 | <=2 | >16 | <=0.5 | 8     | <=0.5 | 4   | <=0.03 |
| V | 2006-S07-027 | Urine | 86 | <=2 | 4   | <=0.5 | 4     | <=0.5 | <=2 | <=0.03 |
| V | 2006-S07-028 | Urine | 68 | <=2 | >16 | 4     | >16   | 16    | >16 | >2     |
| V | 2006-S07-033 | Urine | 57 | <=2 | >16 | <=0.5 | 16    | <=0.5 | 16  | <=0.03 |
| V | 2006-S07-034 | Urine | 53 | <=2 | 2   | <=0.5 | 4     | <=0.5 | <=2 | <=0.03 |
| V | 2006-S07-035 | Urine | 52 | <=2 | >16 | <=0.5 | 8     | <=0.5 | <=2 | <=0.03 |
| V | 2006-S07-036 | Urine | 67 | <=2 | 4   | <=0.5 | 4     | <=0.5 | <=2 | <=0.03 |
| V | 2006-S07-038 | Urine | 3  | <=2 | >16 | <=0.5 | 8     | <=0.5 | <=2 | 0.25   |
| V | 2006-S07-041 | Urine | 28 | <=2 | >16 | <=0.5 | 8     | <=0.5 | <=2 | 0.25   |
| V | 2006-S07-042 | Urine | 59 | <=2 | >16 | <=0.5 | 8     | <=0.5 | <=2 | 0.25   |
| V | 2006-S07-045 | Urine | 59 | <=2 | >16 | <=0.5 | 16    | <=0.5 | >16 | <=0.03 |
| V | 2006-S07-046 | Other | 8  | <=2 | >16 | <=0.5 | 8     | <=0.5 | 4   | <=0.03 |
| V | 2006-S07-048 | Urine | 17 | <=2 | 4   | <=0.5 | 8     | <=0.5 | <=2 | <=0.03 |
| V | 2006-S07-049 | Urine | 85 | 4   | >16 | <=0.5 | 8     | <=0.5 | <=2 | 0.5    |
| V | 2006-S07-050 | Other | 68 | <=2 | >16 | <=0.5 | 4     | <=0.5 | <=2 | 1      |
| V | 2006-S07-184 | Other | 10 | 8   | >16 | <=0.5 | 8     | <=0.5 | 4   | <=0.03 |
| V | 2006-S07-207 | Blood | 72 | 4   | <=1 | <=0.5 | <=0.5 | <=0.5 | <=2 | <=0.03 |
| V | 2006-S07-212 | Blood | 36 | <=2 | >16 | <=0.5 | 8     | <=0.5 | 8   | 0.25   |

|   |              |       |     |     |     |       |     |       |     |        |
|---|--------------|-------|-----|-----|-----|-------|-----|-------|-----|--------|
| V | 2006-S07-216 | Blood | 77  | 8   | >16 | <=0.5 | 8   | <=0.5 | 4   | <=0.03 |
| V | 2006-S07-219 | Blood | 81  | 16  | >16 | <=0.5 | 8   | <=0.5 | 4   | <=0.03 |
| V | 2006-N05-001 | Urine | unk | <=2 | 2   | <=0.5 | 4   | <=0.5 | <=2 | <=0.03 |
| V | 2006-N05-002 | Urine | 1   | 4   | 2   | <=0.5 | 4   | <=0.5 | <=2 | <=0.03 |
| V | 2006-N05-008 | Urine | 84  | <=2 | 2   | <=0.5 | 2   | <=0.5 | <=2 | <=0.03 |
| V | 2006-N05-010 | Urine |     | 4   | >16 | <=0.5 | 4   | <=0.5 | 4   | <=0.03 |
| V | 2006-N05-012 | Urine | 71  | 4   | >16 | <=0.5 | 8   | <=0.5 | 8   | 0.25   |
| V | 2006-N05-013 | Urine | 61  | <=2 | 2   | <=0.5 | 2   | <=0.5 | <=2 | 0.12   |
| V | 2006-N05-019 | Urine | 30  | <=2 | 2   | <=0.5 | 4   | <=0.5 | <=2 | 0.25   |
| V | 2006-N05-020 | Urine | 73  | 4   | 2   | <=0.5 | 4   | <=0.5 | <=2 | <=0.03 |
| V | 2006-N05-024 | Blood |     | <=2 | 2   | <=0.5 | 4   | <=0.5 | <=2 | <=0.03 |
| V | 2006-N05-028 | Urine |     | 4   | >16 | <=0.5 | 8   | <=0.5 | 8   | <=0.03 |
| V | 2006-N05-029 | Urine | 75  | <=2 | 4   | <=0.5 | 4   | <=0.5 | 4   | 0.25   |
| V | 2006-N05-030 | Urine | 62  | <=2 | >16 | <=0.5 | 8   | <=0.5 | <=2 | <=0.03 |
| V | 2006-N05-031 | Urine | unk | <=2 | >16 | <=0.5 | 8   | <=0.5 | 4   | >2     |
| V | 2006-N05-032 | Urine | 69  | 8   | >16 | <=0.5 | 8   | <=0.5 | <=2 | >2     |
| V | 2006-N05-036 | Urine | 28  | <=2 | >16 | <=0.5 | 8   | <=0.5 | <=2 | 1      |
| V | 2006-N05-037 | Urine | 33  | <=2 | >16 | <=0.5 | 8   | <=0.5 | <=2 | <=0.03 |
| V | 2006-N05-039 | Urine |     | 4   | 4   | <=0.5 | 4   | <=0.5 | <=2 | 0.12   |
| V | 2006-N05-040 | Urine |     | <=2 | >16 | <=0.5 | 8   | <=0.5 | <=2 | 0.25   |
| V | 2006-N05-041 | Urine | 55  | <=2 | 8   | <=0.5 | 8   | <=0.5 | 4   | >2     |
| V | 2006-N05-043 | Urine |     | 4   | 4   | <=0.5 | 4   | <=0.5 | <=2 | <=0.03 |
| V | 2006-N05-045 | Urine |     | <=2 | 2   | <=0.5 | 4   | <=0.5 | <=2 | <=0.03 |
| V | 2006-N05-046 | Urine |     | <=2 | >16 | <=0.5 | 8   | <=0.5 | <=2 | 0.12   |
| V | 2006-N05-050 | Urine |     | <=2 | >16 | <=0.5 | 8   | <=0.5 | 4   | <=0.03 |
| V | 2006-N06-001 | Urine | 21  | 4   | >16 | <=0.5 | 16  | <=0.5 | 4   | <=0.03 |
| V | 2006-N06-006 | Urine | 70  | <=2 | 4   | <=0.5 | 4   | <=0.5 | <=2 | <=0.03 |
| V | 2006-N06-007 | Urine | 66  | <=2 | >16 | <=0.5 | 16  | <=0.5 | 8   | >2     |
| V | 2006-N06-011 | Urine | 89  | <=2 | >16 | 16    | >16 | >16   | >16 | >2     |
| V | 2006-N06-014 | Urine | 35  | 4   | >16 | <=0.5 | 8   | <=0.5 | 4   | <=0.03 |
| V | 2006-N06-016 | Urine | 1   | 4   | >16 | <=0.5 | >16 | 1     | >16 | <=0.03 |
| V | 2006-N06-026 | Urine | 74  | <=2 | >16 | <=0.5 | >16 | <=0.5 | >16 | >2     |
| V | 2006-N06-027 | Urine | 89  | 4   | 8   | <=0.5 | 8   | <=0.5 | 16  | >2     |
| V | 2006-N06-028 | Urine | 44  | 8   | >16 | <=0.5 | 8   | <=0.5 | 4   | <=0.03 |
| V | 2006-N06-033 | Other | 78  | <=2 | >16 | <=0.5 | 8   | <=0.5 | 4   | 0.25   |
| V | 2006-N06-034 | Urine | 82  | <=2 | >16 | <=0.5 | 8   | <=0.5 | 4   | 0.25   |
| V | 2006-N06-035 | Urine | 30  | <=2 | >16 | <=0.5 | 4   | <=0.5 | <=2 | <=0.03 |
| V | 2006-N06-038 | Urine | 75  | <=2 | >16 | <=0.5 | 8   | <=0.5 | <=2 | 0.12   |
| V | 2006-N06-039 | Urine | 31  | 4   | >16 | <=0.5 | >16 | <=0.5 | 4   | <=0.03 |
| V | 2006-N06-046 | Other | 80  | 4   | >16 | >16   | 16  | 4     | >16 | <=0.03 |
| V | 2006-N06-211 | Blood | 79  | 4   | >16 | 8     | >16 | 16    | >16 | >2     |
| V | 2006-N06-212 | Blood | 87  | <=2 | 2   | <=0.5 | 4   | <=0.5 | <=2 | <=0.03 |
| V | 2006-N06-214 | Blood | 67  | <=2 | 4   | <=0.5 | 8   | <=0.5 | <=2 | <=0.03 |
| V | 2006-N06-217 | Blood | 85  | 4   | 4   | <=0.5 | 4   | <=0.5 | <=2 | 0.25   |
| V | 2006-N07-001 | Blood | 85  | <=2 | 4   | <=0.5 | 8   | <=0.5 | 4   | <=0.03 |
| V | 2006-N07-002 | Blood | 76  | <=2 | >16 | <=0.5 | 8   | <=0.5 | <=2 | 0.12   |
| V | 2006-N07-004 | Urine | 54  | 4   | >16 | <=0.5 | 8   | <=0.5 | 16  | 0.25   |
| V | 2006-N07-010 | Urine | 94  | 4   | >16 | <=0.5 | 16  | <=0.5 | 8   | <=0.03 |
| V | 2006-N07-013 | Other | 35  | <=2 | >16 | <=0.5 | 16  | <=0.5 | 8   | <=0.03 |
| V | 2006-N07-014 | Urine | 74  | <=2 | >16 | <=0.5 | 8   | <=0.5 | 4   | 0.5    |
| V | 2006-N07-016 | Urine | 66  | <=2 | <=1 | <=0.5 | 2   | <=0.5 | <=2 | <=0.03 |
| V | 2006-N07-019 | Blood | 59  | 8   | 4   | <=0.5 | 8   | <=0.5 | 4   | <=0.03 |
| V | 2006-N07-020 | Urine | 83  | <=2 | >16 | 16    | >16 | >16   | >16 | >2     |
| V | 2006-N07-021 | Urine | 69  | 8   | >16 | <=0.5 | >16 | <=0.5 | >16 | >2     |
| V | 2006-N07-022 | Blood | 72  | <=2 | >16 | <=0.5 | 8   | <=0.5 | 4   | <=0.03 |
| V | 2006-N07-027 | Urine | 42  | 8   | >16 | <=0.5 | 16  | <=0.5 | >16 | <=0.03 |
| V | 2006-N07-028 | Blood | 91  | <=2 | >16 | >16   | >16 | >16   | >16 | >2     |
| V | 2006-N07-032 | Blood | 70  | 4   | >16 | <=0.5 | 16  | <=0.5 | 8   | 0.25   |
| V | 2006-N07-033 | Blood | 82  | 4   | >16 | <=0.5 | 4   | <=0.5 | <=2 | <=0.03 |
| V | 2006-N07-034 | Urine | 75  | <=2 | >16 | <=0.5 | 8   | <=0.5 | 4   | <=0.03 |
| V | 2006-N07-036 | Urine | 47  | <=2 | >16 | <=0.5 | >16 | <=0.5 | >16 | <=0.03 |

|   |              |       |    |     |     |       |     |       |     |        |
|---|--------------|-------|----|-----|-----|-------|-----|-------|-----|--------|
| V | 2006-N07-037 | Urine | 20 | 4   | 4   | <=0.5 | 4   | <=0.5 | <=2 | <=0.03 |
| V | 2006-N07-040 | Urine | 31 | 4   | 2   | <=0.5 | 4   | <=0.5 | <=2 | <=0.03 |
| V | 2006-N07-041 | Urine | 64 | <=2 | >16 | <=0.5 | 16  | <=0.5 | 8   | 0.12   |
| V | 2006-N07-043 | Blood | 71 | <=2 | 4   | <=0.5 | 4   | <=0.5 | <=2 | <=0.03 |
| V | 2006-N07-044 | Urine | 21 | <=2 | 8   | <=0.5 | 4   | <=0.5 | <=2 | <=0.03 |
| V | 2006-N07-045 | Urine | 75 | 4   | >16 | <=0.5 | 8   | <=0.5 | 4   | <=0.03 |
| V | 2006-N07-048 | Blood | 69 | <=2 | 2   | <=0.5 | 2   | <=0.5 | <=2 | 0.25   |
| V | 2006-N07-210 | Blood | 64 | <=2 | 2   | <=0.5 | 4   | <=0.5 | <=2 | <=0.03 |
| V | 2006-N07-216 | Blood | 72 | 4   | 4   | <=0.5 | 4   | <=0.5 | <=2 | 0.25   |
| V | 2006-N07-219 | Blood | 65 | 4   | >16 | <=0.5 | 4   | <=0.5 | 4   | <=0.03 |
| V | 2006-S08-001 | Urine | 48 | 8   | >16 | <=0.5 | 8   | <=0.5 | 4   | 0.12   |
| V | 2006-S08-004 | Urine | 23 | 4   | >16 | <=0.5 | 8   | <=0.5 | 4   | <=0.03 |
| V | 2006-S08-006 | Urine | 77 | 4   | 4   | <=0.5 | 4   | <=0.5 | <=2 | >2     |
| V | 2006-S08-007 | Urine | 81 | <=2 | <=1 | <=0.5 | 1   | <=0.5 | <=2 | <=0.03 |
| V | 2006-S08-011 | Urine | 81 | 4   | <=1 | <=0.5 | 1   | <=0.5 | <=2 | <=0.03 |
| V | 2006-S08-013 | Urine | 56 | 4   | >16 | 8     | >16 | 16    | >16 | 0.12   |
| V | 2006-S08-016 | Urine | 81 | <=2 | >16 | <=0.5 | 8   | <=0.5 | <=2 | <=0.03 |
| V | 2006-S08-017 | Urine | 82 | 4   | >16 | <=0.5 | 8   | <=0.5 | 16  | <=0.03 |
| V | 2006-S08-019 | Urine | 79 | 4   | >16 | 8     | >16 | 16    | >16 | >2     |
| V | 2006-S08-022 | Urine | 53 | 4   | >16 | <=0.5 | 16  | <=0.5 | 16  | <=0.03 |
| V | 2006-S08-023 | Urine | 22 | <=2 | >16 | <=0.5 | 16  | <=0.5 | >16 | <=0.03 |
| V | 2006-S08-026 | Urine | 35 | 8   | 2   | <=0.5 | 4   | <=0.5 | <=2 | <=0.03 |
| V | 2006-S08-033 | Urine | 82 | 4   | >16 | <=0.5 | 16  | 1     | 8   | 0.5    |
| V | 2006-S08-039 | Urine | 55 | <=2 | >16 | <=0.5 | 16  | <=0.5 | <=2 | <=0.03 |
| V | 2006-S08-040 | Other | 74 | 8   | <=1 | <=0.5 | 4   | <=0.5 | <=2 | <=0.03 |
| V | 2006-S08-041 | Urine | 68 | 8   | >16 | <=0.5 | 8   | <=0.5 | 4   | <=0.03 |
| V | 2006-S08-043 | Urine | 53 | <=2 | 4   | <=0.5 | 4   | <=0.5 | 4   | <=0.03 |
| V | 2006-S08-045 | Urine | 8  | <=2 | >16 | <=0.5 | 8   | <=0.5 | <=2 | >2     |
| V | 2006-S08-046 | Urine | 81 | 8   | 4   | <=0.5 | 4   | <=0.5 | <=2 | 0.25   |
| V | 2006-E02-002 | Urine | 73 | <=2 | >16 | <=0.5 | 8   | <=0.5 | 4   | 0.25   |
| V | 2006-E02-003 | Urine | 41 | <=2 | 4   | <=0.5 | 4   | <=0.5 | 4   | <=0.03 |
| V | 2006-E02-005 | Urine | 78 | 8   | >16 | <=0.5 | 8   | <=0.5 | 8   | 0.06   |
| V | 2006-E02-006 | Urine | 23 | <=2 | >16 | <=0.5 | 8   | <=0.5 | 4   | >2     |
| V | 2006-E02-009 | Urine | 56 | 8   | >16 | <=0.5 | 16  | <=0.5 | <=2 | >2     |
| V | 2006-E02-011 | Urine | 53 | <=2 | >16 | <=0.5 | 8   | <=0.5 | <=2 | 0.25   |
| V | 2006-E02-015 | Urine | 56 | 4   | >16 | <=0.5 | 8   | <=0.5 | 8   | >2     |
| V | 2006-E02-017 | Urine | 55 | <=2 | >16 | <=0.5 | 16  | <=0.5 | >16 | <=0.03 |
| V | 2006-E02-019 | Urine | 44 | <=2 | >16 | <=0.5 | 8   | <=0.5 | <=2 | 0.12   |
| V | 2006-E02-022 | Other | 81 | <=2 | >16 | <=0.5 | 8   | <=0.5 | <=2 | 0.12   |
| V | 2006-E02-024 | Urine | 53 | <=2 | >16 | <=0.5 | 16  | <=0.5 | 8   | 0.25   |
| V | 2006-E02-030 | Urine | 49 | <=2 | >16 | <=0.5 | 8   | <=0.5 | <=2 | <=0.03 |
| V | 2006-E02-033 | Urine | 69 | <=2 | >16 | <=0.5 | 8   | <=0.5 | <=2 | <=0.03 |
| V | 2006-E02-046 | Urine | 62 | 8   | 2   | <=0.5 | 4   | <=0.5 | <=2 | <=0.03 |
| V | 2006-E02-048 | Urine | 81 | <=2 | >16 | <=0.5 | 8   | <=0.5 | <=2 | 0.12   |
| V | 2006-E02-203 | Blood | 73 | <=2 | 2   | <=0.5 | 4   | <=0.5 | <=2 | <=0.03 |
| V | 2006-E02-205 | Blood | 67 | 4   | 2   | <=0.5 | 4   | <=0.5 | <=2 | <=0.03 |
| V | 2006-E02-213 | Blood | 1  | <=2 | >16 | <=0.5 | 8   | <=0.5 | <=2 | <=0.03 |
| V | 2006-E02-216 | Blood | 82 | 4   | >16 | <=0.5 | 8   | <=0.5 | <=2 | 0.25   |
| V | 2006-E02-217 | Blood | 53 | <=2 | >16 | <=0.5 | 8   | <=0.5 | 4   | <=0.03 |
| V | 2006-N08-001 | Blood | 83 | <=2 | >16 | 8     | >16 | 16    | >16 | >2     |
| V | 2006-N08-008 | Urine | 17 | 4   | 4   | <=0.5 | 4   | <=0.5 | <=2 | <=0.03 |
| V | 2006-N08-009 | Urine | 40 | <=2 | >16 | <=0.5 | 8   | <=0.5 | <=2 | <=0.03 |
| V | 2006-N08-011 | Urine | 17 | 4   | 2   | <=0.5 | 4   | <=0.5 | <=2 | <=0.03 |
| V | 2006-N08-015 | Urine | 27 | <=2 | >16 | <=0.5 | 8   | <=0.5 | <=2 | 0.25   |
| V | 2006-N08-018 | Urine | 26 | <=2 | >16 | <=0.5 | 8   | <=0.5 | <=2 | 0.12   |
| V | 2006-N08-019 | Urine | 56 | 4   | >16 | <=0.5 | 8   | <=0.5 | <=2 | <=0.03 |
| V | 2006-N08-021 | Urine | 32 | <=2 | 4   | <=0.5 | 4   | <=0.5 | <=2 | <=0.03 |
| V | 2006-N08-022 | Urine | 40 | <=2 | >16 | 2     | >16 | 4     | >16 | 0.25   |
| V | 2006-N08-023 | Urine | 23 | 4   | 4   | <=0.5 | 4   | <=0.5 | 4   | <=0.03 |
| V | 2006-N08-024 | Urine | 36 | <=2 | 4   | <=0.5 | 4   | <=0.5 | <=2 | <=0.03 |
| V | 2006-N08-025 | Urine | 79 | 4   | >16 | <=0.5 | 8   | <=0.5 | 4   | <=0.03 |



|   |              |       |    |     |     |       |     |       |     |        |
|---|--------------|-------|----|-----|-----|-------|-----|-------|-----|--------|
| V | 2006-C07-002 | Urine | 93 | 4   | >16 | 2     | 8   | 1     | >16 | >2     |
| V | 2006-C07-004 | Urine | 80 | 4   | >16 | 16    | >16 | >16   | >16 | >2     |
| V | 2006-C07-007 | Urine | 71 | 4   | 4   | <=0.5 | 8   | <=0.5 | <=2 | 0.12   |
| V | 2006-C07-008 | Urine | 66 | 8   | >16 | >16   | >16 | >16   | >16 | >2     |
| V | 2006-C07-009 | Urine | 74 | 8   | >16 | 4     | >16 | >16   | >16 | >2     |
| V | 2006-C07-010 | Urine | 73 | 8   | >16 | <=0.5 | 8   | <=0.5 | 8   | >2     |
| V | 2006-C07-015 | Urine | 33 | 4   | >16 | <=0.5 | 8   | <=0.5 | <=2 | <=0.03 |
| V | 2006-C07-016 | Urine | 73 | <=2 | >16 | 8     | >16 | 16    | >16 | >2     |
| V | 2006-C07-018 | Blood | 44 | <=2 | 4   | 2     | 8   | <=0.5 | <=2 | <=0.03 |
| V | 2006-C07-019 | Blood | 60 | <=2 | >16 | <=0.5 | 8   | <=0.5 | <=2 | <=0.03 |
| V | 2006-C07-022 | Urine | 84 | <=2 | >16 | 1     | >16 | 4     | >16 | >2     |
| V | 2006-C07-025 | Urine | 65 | 4   | >16 | <=0.5 | 8   | <=0.5 | <=2 | <=0.03 |
| V | 2006-C07-026 | Urine | 62 | 4   | >16 | <=0.5 | 8   | <=0.5 | <=2 | 0.25   |
| V | 2006-C07-027 | Other | 43 | <=2 | >16 | <=0.5 | 8   | <=0.5 | <=2 | >2     |
| V | 2006-C07-033 | Urine | 74 | <=2 | >16 | <=0.5 | >16 | <=0.5 | <=2 | >2     |
| V | 2006-C07-035 | Urine | 78 | <=2 | >16 | >16   | >16 | >16   | >16 | >2     |
| V | 2006-C07-036 | Urine | 78 | <=2 | >16 | 16    | >16 | >16   | >16 | >2     |
| V | 2006-C07-038 | Urine | 67 | <=2 | 2   | 16    | >16 | 8     | 8   | 0.25   |
| V | 2006-C07-040 | Blood | 62 | 4   | >16 | <=0.5 | 8   | <=0.5 | <=2 | <=0.03 |
| V | 2006-C07-041 | Urine | 71 | <=2 | 2   | <=0.5 | 4   | <=0.5 | <=2 | <=0.03 |
| V | 2006-C07-043 | Blood | 70 | <=2 | 2   | <=0.5 | 4   | <=0.5 | <=2 | <=0.03 |
| V | 2006-C07-050 | Blood | 84 | <=2 | >16 | <=0.5 | 8   | <=0.5 | 4   | >2     |
| V | 2006-C07-205 | Blood | 51 | <=2 | >16 | <=0.5 | 16  | <=0.5 | 4   | 0.25   |
| V | 2006-C07-216 | Blood | 81 | 8   | >16 | 4     | >16 | 2     | >16 | 0.25   |
| V | 2006-C07-217 | Blood | 50 | <=2 | >16 | <=0.5 | 8   | <=0.5 | <=2 | 0.12   |
| V | 2006-N16-001 | Urine | 83 | 8   | <=1 | <=0.5 | 4   | <=0.5 | <=2 | <=0.03 |
| V | 2006-N16-002 | Urine | 81 | 4   | >16 | <=0.5 | 16  | <=0.5 | <=2 | <=0.03 |
| V | 2006-N16-008 | Blood | 86 | 4   | >16 | <=0.5 | 8   | <=0.5 | 4   | >2     |
| V | 2006-N16-011 | Blood | 55 | <=2 | >16 | 16    | >16 | 16    | >16 | 1      |
| V | 2006-N16-016 | Urine | 68 | <=2 | >16 | >16   | >16 | >16   | >16 | >2     |
| V | 2006-N16-020 | Other | 35 | 4   | >16 | <=0.5 | 8   | <=0.5 | <=2 | 0.5    |
| V | 2006-N16-021 | Blood | 88 | 4   | >16 | <=0.5 | 16  | <=0.5 | 4   | >2     |
| V | 2006-N16-024 | Other | 71 | <=2 | >16 | <=0.5 | 8   | <=0.5 | 4   | <=0.03 |
| V | 2006-N16-027 | Urine | 66 | <=2 | >16 | <=0.5 | 8   | <=0.5 | 4   | >2     |
| V | 2006-N16-031 | Blood | 72 | 4   | >16 | <=0.5 | 8   | <=0.5 | <=2 | <=0.03 |
| V | 2006-N16-032 | Urine | 85 | <=2 | 2   | <=0.5 | 4   | <=0.5 | <=2 | <=0.03 |
| V | 2006-N16-036 | Urine | 19 | 8   | 4   | <=0.5 | 4   | <=0.5 | <=2 | 0.25   |
| V | 2006-N16-038 | Urine | 83 | 4   | >16 | <=0.5 | 8   | <=0.5 | >16 | >2     |
| V | 2006-N16-040 | Blood | 63 | 4   | 4   | <=0.5 | 4   | <=0.5 | <=2 | 0.25   |
| V | 2006-N16-044 | Other | 2  | <=2 | 2   | <=0.5 | 4   | <=0.5 | <=2 | <=0.03 |
| V | 2006-N16-048 | Urine | 69 | <=2 | >16 | >16   | >16 | >16   | >16 | >2     |
| V | 2006-N16-050 | Urine | 46 | 4   | 4   | <=0.5 | 4   | <=0.5 | <=2 | <=0.03 |
| V | 2006-N16-202 | Blood | 70 | <=2 | >16 | 4     | >16 | 16    | >16 | <=0.03 |
| V | 2006-N16-203 | Blood | 57 | 4   | >16 | 16    | >16 | >16   | >16 | >2     |
| V | 2006-N16-206 | Blood | 79 | <=2 | >16 | <=0.5 | 8   | <=0.5 | 4   | 0.5    |
| V | 2006-N16-216 | Blood | 82 | 4   | 2   | <=0.5 | 4   | <=0.5 | <=2 | 0.25   |
| V | 2006-N19-001 | Urine | 43 | 4   | 4   | <=0.5 | 4   | <=0.5 | 4   | <=0.03 |
| V | 2006-N19-002 | Urine | 24 | 8   | >16 | <=0.5 | 8   | <=0.5 | <=2 | 0.25   |
| V | 2006-N19-006 | Urine | 35 | 16  | >16 | <=0.5 | 16  | <=0.5 | 4   | >2     |
| V | 2006-N19-007 | Urine | 38 | 4   | >16 | <=0.5 | 8   | <=0.5 | 8   | >2     |
| V | 2006-N19-010 | Urine | 45 | 4   | >16 | <=0.5 | 8   | <=0.5 | 4   | <=0.03 |
| V | 2006-N19-011 | Urine | 80 | <=2 | >16 | <=0.5 | 8   | <=0.5 | <=2 | 0.25   |
| V | 2006-N19-012 | Urine | 22 | 8   | 4   | <=0.5 | 4   | <=0.5 | <=2 | 0.5    |
| V | 2006-N19-018 | Urine | 57 | <=2 | 4   | <=0.5 | 8   | <=0.5 | <=2 | >2     |
| V | 2006-N19-022 | Urine | 64 | 8   | 4   | <=0.5 | 8   | <=0.5 | <=2 | <=0.03 |
| V | 2006-N19-024 | Blood | 50 | 4   | 4   | <=0.5 | 4   | <=0.5 | <=2 | 0.25   |
| V | 2006-N19-026 | Urine | 41 | 4   | >16 | <=0.5 | 8   | <=0.5 | 4   | <=0.03 |
| V | 2006-N19-027 | Other | 37 | <=2 | >16 | <=0.5 | 8   | <=0.5 | <=2 | 0.12   |
| V | 2006-N19-033 | Urine | 25 | 8   | >16 | <=0.5 | 8   | <=0.5 | 8   | 0.12   |
| V | 2006-N19-034 | Urine | 77 | 4   | 4   | <=0.5 | 4   | <=0.5 | <=2 | <=0.03 |
| V | 2006-N19-035 | Urine | 42 | 4   | 4   | <=0.5 | 4   | <=0.5 | <=2 | <=0.03 |

|   |              |       |    |     |     |       |     |       |     |        |
|---|--------------|-------|----|-----|-----|-------|-----|-------|-----|--------|
| V | 2006-N19-037 | Urine | 39 | <=2 | >16 | <=0.5 | 16  | <=0.5 | 8   | <=0.03 |
| V | 2006-N19-046 | Urine | 18 | <=2 | 4   | <=0.5 | 4   | <=0.5 | <=2 | <=0.03 |
| V | 2006-N19-047 | Urine | 85 | >32 | >16 | 8     | >16 | 2     | >16 | >2     |
| V | 2006-N19-048 | Urine | 42 | 4   | 8   | <=0.5 | 4   | <=0.5 | <=2 | <=0.03 |
| V | 2006-N19-050 | Urine | 88 | 4   | >16 | 8     | >16 | 16    | >16 | >2     |
| V | 2006-N19-201 | Blood | 35 | 4   | >16 | <=0.5 | 8   | <=0.5 | 4   | <=0.03 |
| V | 2006-N19-202 | Blood | 87 | <=2 | >16 | <=0.5 | 8   | <=0.5 | 4   | 0.5    |
| V | 2006-N19-204 | Blood | 69 | 4   | 2   | <=0.5 | 4   | <=0.5 | <=2 | <=0.03 |
| V | 2006-N19-207 | Blood | 78 | 4   | >16 | <=0.5 | 8   | <=0.5 | <=2 | <=0.03 |
| V | 2006-N19-208 | Blood | 72 | <=2 | >16 | <=0.5 | 8   | <=0.5 | <=2 | <=0.03 |
| V | 2006-N19-209 | Blood | 32 | 4   | 4   | <=0.5 | 4   | <=0.5 | <=2 | <=0.03 |
| V | 2006-N19-210 | Blood | 77 | 4   | >16 | <=0.5 | 8   | <=0.5 | <=2 | 0.25   |
| V | 2006-N19-211 | Blood | 71 | 4   | >16 | <=0.5 | 16  | <=0.5 | 16  | <=0.03 |
| V | 2006-N19-213 | Blood | 79 | 4   | 2   | <=0.5 | 4   | <=0.5 | <=2 | <=0.03 |
| V | 2006-N19-215 | Blood | 62 | 4   | >16 | <=0.5 | 8   | <=0.5 | 4   | >2     |
| V | 2006-N19-217 | Blood | 79 | 8   | >16 | <=0.5 | 8   | <=0.5 | 8   | <=0.03 |
| V | 2006-C08-004 | Urine | 54 | <=2 | >16 | <=0.5 | 16  | <=0.5 | 8   | <=0.03 |
| V | 2006-C08-009 | Urine | 68 | <=2 | >16 | 16    | >16 | >16   | >16 | >2     |
| V | 2006-C08-028 | Urine | 7  | <=2 | >16 | <=0.5 | 8   | <=0.5 | <=2 | <=0.03 |
| V | 2006-C08-030 | Urine | 25 | <=2 | >16 | 4     | >16 | 16    | >16 | >2     |
| V | 2006-C08-031 | Urine | 0  | 8   | >16 | <=0.5 | 16  | <=0.5 | <=2 | <=0.03 |
| V | 2006-C08-035 | Urine | 69 | <=2 | >16 | <=0.5 | 8   | <=0.5 | <=2 | 0.25   |
| V | 2006-C08-039 | Other | 50 | 16  | >16 | <=0.5 | 16  | <=0.5 | 16  | <=0.03 |
| V | 2006-C08-042 | Urine | 25 | 4   | >16 | <=0.5 | 8   | <=0.5 | <=2 | <=0.03 |
| V | 2006-C08-044 | Other | 78 | 4   | >16 | <=0.5 | 4   | <=0.5 | 4   | 0.5    |
| V | 2006-C08-049 | Urine | 62 | 8   | >16 | 2     | >16 | 16    | >16 | >2     |
| V | 2006-C08-209 | Blood | 24 | <=2 | >16 | <=0.5 | 8   | <=0.5 | <=2 | >2     |
| V | 2006-C08-211 | Blood | 74 | 8   | 4   | <=0.5 | 4   | <=0.5 | <=2 | <=0.03 |
| V | 2006-S11-002 | Urine | 55 | 4   | 2   | <=0.5 | 2   | <=0.5 | <=2 | <=0.03 |
| V | 2006-S11-006 | Blood | 73 | <=2 | >16 | 8     | >16 | 16    | >16 | >2     |
| V | 2006-S11-007 | Blood | 63 | 16  | >16 | <=0.5 | 8   | 1     | 16  | 0.25   |
| V | 2006-S11-009 | Urine | 25 | <=2 | 4   | <=0.5 | 4   | <=0.5 | <=2 | <=0.03 |
| V | 2006-S11-013 | Urine | 78 | <=2 | >16 | <=0.5 | 16  | <=0.5 | 8   | <=0.03 |
| V | 2006-S11-014 | Urine | 29 | <=2 | >16 | <=0.5 | 16  | <=0.5 | 16  | >2     |
| V | 2006-S11-017 | Urine | 41 | <=2 | >16 | <=0.5 | 4   | <=0.5 | <=2 | 0.5    |
| V | 2006-S11-018 | Urine | 61 | <=2 | 4   | <=0.5 | 4   | <=0.5 | <=2 | 0.25   |
| V | 2006-S11-024 | Urine | 51 | 4   | 2   | <=0.5 | 4   | <=0.5 | <=2 | >2     |
| V | 2006-S11-026 | Urine | 27 | <=2 | 2   | <=0.5 | 4   | <=0.5 | <=2 | <=0.03 |
| V | 2006-S11-027 | Urine | 82 | 32  | >16 | >16   | >16 | >16   | >16 | >2     |
| V | 2006-S11-033 | Urine | 37 | <=2 | >16 | <=0.5 | 8   | <=0.5 | <=2 | 0.25   |
| V | 2006-S11-034 | Blood | 87 | <=2 | >16 | <=0.5 | 8   | <=0.5 | 4   | 0.25   |
| V | 2006-S11-039 | Urine | 43 | 4   | >16 | <=0.5 | 16  | <=0.5 | 4   | 0.5    |
| V | 2006-S11-041 | Urine | 56 | 4   | >16 | 4     | 8   | 1     | >16 | >2     |
| V | 2006-S11-042 | Urine | 82 | <=2 | 4   | <=0.5 | 8   | <=0.5 | <=2 | <=0.03 |
| V | 2006-S11-044 | Urine | 71 | 4   | >16 | <=0.5 | 16  | <=0.5 | 8   | <=0.03 |
| V | 2006-S11-046 | Blood | 77 | <=2 | 4   | <=0.5 | 4   | <=0.5 | <=2 | <=0.03 |
| V | 2006-S11-047 | Blood | 76 | <=2 | 4   | <=0.5 | 4   | <=0.5 | <=2 | <=0.03 |
| V | 2006-S11-048 | Urine | 53 | 4   | >16 | <=0.5 | 4   | <=0.5 | <=2 | 0.12   |
| V | 2006-S11-049 | Urine | 52 | <=2 | >16 | <=0.5 | 8   | <=0.5 | 4   | 0.12   |
| V | 2006-S11-187 | Urine | 6  | 4   | >16 | <=0.5 | 8   | <=0.5 | 4   | <=0.03 |
| V | 2006-S11-190 | Urine | 3  | <=2 | >16 | <=0.5 | 16  | <=0.5 | 8   | 0.06   |
| V | 2006-S11-191 | Urine | 6  | 4   | >16 | <=0.5 | 16  | <=0.5 | >16 | 0.12   |
| V | 2006-S11-196 | Urine | 0  | <=2 | >16 | 16    | >16 | >16   | >16 | <=0.03 |
| V | 2006-S11-199 | Urine | 10 | 4   | >16 | <=0.5 | >16 | 1     | >16 | >2     |
| V | 2006-S11-204 | Blood | 58 | <=2 | 2   | <=0.5 | 2   | <=0.5 | <=2 | 0.12   |
| V | 2006-S11-212 | Blood | 70 | <=2 | >16 | <=0.5 | 16  | <=0.5 | 8   | <=0.03 |
| V | 2006-N21-010 | Urine | 64 | 4   | >16 | <=0.5 | 8   | <=0.5 | 4   | 0.25   |
| V | 2006-N21-012 | Urine | 55 | 4   | >16 | <=0.5 | 8   | <=0.5 | 16  | <=0.03 |
| V | 2006-N21-013 | Urine | 81 | <=2 | >16 | <=0.5 | 8   | <=0.5 | <=2 | >2     |
| V | 2006-N21-015 | Urine | 43 | 8   | >16 | <=0.5 | 8   | <=0.5 | 8   | <=0.03 |
| V | 2006-N21-020 | Urine | 60 | 4   | 4   | <=0.5 | 4   | <=0.5 | <=2 | 0.25   |

|   |              |       |    |     |     |       |     |       |     |        |
|---|--------------|-------|----|-----|-----|-------|-----|-------|-----|--------|
| V | 2006-N21-021 | Urine | 1  | 4   | >16 | <=0.5 | 8   | <=0.5 | 4   | 1      |
| V | 2006-N21-040 | Other | 83 | <=2 | >16 | <=0.5 | 8   | <=0.5 | 4   | 0.25   |
| V | 2006-N21-041 | Other | 31 | 4   | >16 | <=0.5 | 8   | <=0.5 | <=2 | 0.25   |
| V | 2006-N21-042 | Urine | 53 | <=2 | >16 | 1     | 8   | <=0.5 | <=2 | <=0.03 |
| V | 2006-N21-044 | Urine | 83 | <=2 | >16 | <=0.5 | 16  | <=0.5 | >16 | >2     |
| V | 2006-N21-047 | Urine | 0  | <=2 | >16 | 4     | 16  | 1     | >16 | 0.25   |
| V | 2006-N21-198 | Urine | 0  | 8   | >16 | <=0.5 | 8   | <=0.5 | <=2 | <=0.03 |
| V | 2006-N21-215 | Blood | 70 | 4   | >16 | <=0.5 | 8   | <=0.5 | 4   | 0.25   |
| V | 2006-C09-002 | Urine | 60 | <=2 | >16 | <=0.5 | 8   | <=0.5 | <=2 | 0.25   |
| V | 2006-C09-003 | Other | 70 | <=2 | 2   | <=0.5 | 2   | <=0.5 | <=2 | <=0.03 |
| V | 2006-C09-005 | Urine | 18 | <=2 | >16 | <=0.5 | 8   | <=0.5 | 4   | <=0.03 |
| V | 2006-C09-012 | Blood | 41 | 4   | >16 | <=0.5 | 16  | <=0.5 | >16 | <=0.03 |
| V | 2006-C09-015 | Blood | 87 | 4   | >16 | <=0.5 | 16  | <=0.5 | 4   | <=0.03 |
| V | 2006-C09-019 | Urine | 46 | <=2 | >16 | <=0.5 | 8   | <=0.5 | <=2 | <=0.03 |
| V | 2006-C09-021 | Urine | 9  | 4   | 4   | <=0.5 | 4   | <=0.5 | <=2 | <=0.03 |
| V | 2006-C09-022 | Urine | 64 | <=2 | 4   | <=0.5 | 4   | <=0.5 | <=2 | <=0.03 |
| V | 2006-C09-025 | Urine | 74 | <=2 | >16 | <=0.5 | 8   | <=0.5 | <=2 | >2     |
| V | 2006-C09-026 | Urine | 72 | >32 | >16 | >16   | >16 | >16   | >16 | >2     |
| V | 2006-C09-028 | Urine | 72 | <=2 | >16 | <=0.5 | 8   | <=0.5 | 4   | <=0.03 |
| V | 2006-C09-029 | Blood | 71 | <=2 | >16 | <=0.5 | 8   | <=0.5 | <=2 | 0.25   |
| V | 2006-C09-030 | Blood | 61 | 8   | >16 | <=0.5 | 16  | <=0.5 | 4   | <=0.03 |
| V | 2006-C09-031 | Urine | 44 | <=2 | >16 | <=0.5 | 16  | <=0.5 | 8   | <=0.03 |
| V | 2006-C09-033 | Urine | 76 | 4   | >16 | >16   | >16 | >16   | >16 | <=0.03 |
| V | 2006-C09-035 | Urine | 61 | 4   | >16 | <=0.5 | >16 | <=0.5 | 8   | <=0.03 |
| V | 2006-C09-042 | Urine | 56 | <=2 | >16 | <=0.5 | 4   | <=0.5 | <=2 | 0.25   |
| V | 2006-C09-044 | Urine | 78 | <=2 | 4   | <=0.5 | 4   | <=0.5 | <=2 | <=0.03 |
| V | 2006-C09-045 | Urine | 84 | <=2 | 2   | <=0.5 | 4   | <=0.5 | <=2 | <=0.03 |
| V | 2006-C09-048 | Blood | 40 | 4   | 4   | <=0.5 | 4   | <=0.5 | <=2 | <=0.03 |
| V | 2006-C09-050 | Urine | 75 | 4   | 4   | 1     | 4   | <=0.5 | 4   | 0.25   |
| V | 2006-C09-188 | Urine | 1  | <=2 | >16 | 16    | >16 | 16    | >16 | 0.5    |
| V | 2006-C09-193 | Blood | 27 | <=2 | >16 | <=0.5 | 16  | <=0.5 | >16 | 0.12   |
| V | 2006-C09-203 | Blood | 74 | <=2 | 4   | <=0.5 | 8   | <=0.5 | <=2 | <=0.03 |
| V | 2006-C09-207 | Blood | 82 | <=2 | 4   | <=0.5 | 4   | <=0.5 | <=2 | <=0.03 |
| V | 2006-C09-210 | Blood | 50 | <=2 | >16 | <=0.5 | 8   | <=0.5 | 4   | 0.25   |
| V | 2006-C09-212 | Blood | 71 | <=2 | >16 | <=0.5 | 8   | <=0.5 | 4   | <=0.03 |
| V | 2006-C09-218 | Blood | 34 | 4   | >16 | <=0.5 | 8   | <=0.5 | <=2 | 0.12   |
| V | 2006-C10-001 | Blood | 49 | 4   | >16 | <=0.5 | 8   | <=0.5 | <=2 | <=0.03 |
| V | 2006-C10-002 | Urine | 56 | <=2 | >16 | <=0.5 | 16  | <=0.5 | 8   | <=0.03 |
| V | 2006-C10-007 | Urine | 28 | <=2 | >16 | <=0.5 | >16 | 1     | >16 | <=0.03 |
| V | 2006-C10-008 | Urine | 55 | 4   | >16 | <=0.5 | 8   | <=0.5 | 4   | 0.25   |
| V | 2006-C10-009 | Urine | 93 | <=2 | 4   | <=0.5 | 4   | <=0.5 | <=2 | <=0.03 |
| V | 2006-C10-014 | Urine | 32 | <=2 | >16 | <=0.5 | 16  | <=0.5 | >16 | <=0.03 |
| V | 2006-C10-027 | Urine | 54 | 4   | 4   | <=0.5 | 4   | <=0.5 | <=2 | <=0.03 |
| V | 2006-C10-028 | Urine | 36 | <=2 | >16 | 16    | >16 | >16   | >16 | >2     |
| V | 2006-C10-032 | Urine | 79 | 4   | >16 | 8     | >16 | 16    | >16 | 2      |
| V | 2006-C10-033 | Blood | 74 | 4   | >16 | <=0.5 | 16  | <=0.5 | 16  | <=0.03 |
| V | 2006-C10-034 | Blood | 47 | 4   | >16 | <=0.5 | 8   | <=0.5 | <=2 | <=0.03 |
| V | 2006-C10-039 | Urine | 48 | <=2 | >16 | <=0.5 | 8   | <=0.5 | 4   | <=0.03 |
| V | 2006-C10-040 | Urine | 1  | <=2 | >16 | <=0.5 | 8   | <=0.5 | 4   | >2     |
| V | 2006-C10-041 | Urine | 83 | <=2 | 4   | <=0.5 | 4   | <=0.5 | <=2 | <=0.03 |
| V | 2006-C10-047 | Urine | 66 | <=2 | >16 | <=0.5 | 8   | <=0.5 | <=2 | 1      |
| V | 2006-C10-048 | Urine | 35 | 4   | >16 | <=0.5 | 8   | <=0.5 | 4   | <=0.03 |
| V | 2006-C10-202 | Blood | 70 | <=2 | >16 | <=0.5 | 8   | <=0.5 | 4   | 0.25   |
| V | 2006-C10-207 | Blood | 75 | 8   | <=1 | <=0.5 | 1   | <=0.5 | <=2 | <=0.03 |
| V | 2006-C10-208 | Blood | 58 | <=2 | >16 | <=0.5 | 8   | <=0.5 | 8   | >2     |
| V | 2006-C10-213 | Blood | 71 | 8   | 4   | <=0.5 | 4   | <=0.5 | <=2 | <=0.03 |
| V | 2006-C10-219 | Blood | 51 | 4   | >16 | <=0.5 | 8   | <=0.5 | <=2 | 0.25   |
| V | 2006-E04-003 | Urine | 37 | <=2 | >16 | <=0.5 | 8   | <=0.5 | 16  | 1      |
| V | 2006-E04-005 | Urine | 6  | <=2 | >16 | <=0.5 | 16  | <=0.5 | 8   | <=0.03 |
| V | 2006-E04-012 | Urine | 34 | <=2 | >16 | <=0.5 | 8   | <=0.5 | 4   | >2     |
| V | 2006-E04-014 | Blood | 72 | <=2 | >16 | <=0.5 | 8   | <=0.5 | 4   | 0.12   |

|    |              |       |        |     |     |       |     |       |     |        |
|----|--------------|-------|--------|-----|-----|-------|-----|-------|-----|--------|
| V  | 2006-E04-020 | Other | 57     | 8   | >16 | <=0.5 | >16 | <=0.5 | 16  | >2     |
| V  | 2006-E04-024 | Urine | 1      | <=2 | >16 | <=0.5 | 8   | <=0.5 | <=2 | <=0.03 |
| V  | 2006-E04-029 | Other | 64     | <=2 | >16 | >16   | 8   | 4     | >16 | <=0.03 |
| V  | 2006-E04-030 | Urine | 29     | <=2 | >16 | <=0.5 | 8   | <=0.5 | 4   | <=0.03 |
| V  | 2006-E04-031 | Urine | 65     | <=2 | >16 | <=0.5 | 8   | <=0.5 | 4   | 0.25   |
| V  | 2006-E04-032 | Urine | 7      | <=2 | >16 | <=0.5 | 16  | <=0.5 | 4   | 0.06   |
| V  | 2006-E04-033 | Urine | 83     | <=2 | 2   | <=0.5 | 4   | <=0.5 | <=2 | 0.12   |
| V  | 2006-E04-035 | Urine | 61     | <=2 | >16 | <=0.5 | >16 | <=0.5 | 8   | <=0.03 |
| V  | 2006-E04-042 | Other | 62     | <=2 | 8   | <=0.5 | 8   | <=0.5 | 8   | 0.5    |
| V  | 2006-E04-047 | Urine | 23     | 4   | >16 | <=0.5 | 16  | <=0.5 | 4   | 0.25   |
| V  | 2006-E04-205 | Blood | 84     | <=2 | >16 | <=0.5 | 8   | <=0.5 | 4   | 0.25   |
| V  | 2006-E04-207 | Blood | 70     | 4   | 4   | <=0.5 | 4   | <=0.5 | <=2 | <=0.03 |
| V  | 2006-E04-212 | Blood | 21     | 4   | >16 | <=0.5 | 8   | <=0.5 | 4   | <=0.03 |
| V  | 2006-E04-213 | Blood | 17     | 8   | >16 | <=0.5 | 8   | <=0.5 | 4   | <=0.03 |
| V  | 2006-E04-214 | Blood | 62     | <=2 | 4   | <=0.5 | 8   | <=0.5 | 4   | <=0.03 |
| VI | 2008-S01-002 | Blood | 75     | <=2 | >16 | <=0.5 | 8   | <=0.5 | 4   | <=0.03 |
| VI | 2008-S01-003 | Urine | 84     | 4   | >16 | 4     | >16 | 16    | >16 | 0.5    |
| VI | 2008-S01-006 | Urine | 70     | 4   | >16 | <=0.5 | 8   | <=0.5 | 4   | <=0.03 |
| VI | 2008-S01-008 | Urine | 72     | <=2 | 4   | >16   | 2   | >16   | <=2 | 0.06   |
| VI | 2008-S01-009 | Urine | 45     | <=2 | >16 | <=0.5 | 8   | <=0.5 | 4   | 0.06   |
| VI | 2008-S01-023 | Urine | 2      | <=2 | 4   | <=0.5 | 4   | <=0.5 | <=2 | <=0.03 |
| VI | 2008-S01-024 | Urine | 71     | <=2 | >16 | <=0.5 | 16  | <=0.5 | 16  | 1      |
| VI | 2008-S01-025 | Urine | 62     | <=2 | 2   | <=0.5 | 4   | <=0.5 | <=2 | 0.25   |
| VI | 2008-S01-038 | Urine | 67     | <=2 | >16 | <=0.5 | 16  | <=0.5 | 4   | >2     |
| VI | 2008-S01-046 | Urine | 73     | 16  | >16 | 2     | 8   | <=0.5 | >16 | >2     |
| VI | 2008-S01-047 | Blood | 80     | 4   | 4   | 1     | 8   | <=0.5 | <=2 | <=0.03 |
| VI | 2008-S01-049 | Urine | 21     | <=2 | 4   | <=0.5 | 4   | <=0.5 | <=2 | 0.25   |
| VI | 2008-S01-215 | Blood | 61     | <=2 | 8   | <=0.5 | 8   | <=0.5 | <=2 | <=0.03 |
| VI | 2008-S01-223 | Blood | 72     | 4   | 4   | <=0.5 | 4   | <=0.5 | <=2 | <=0.03 |
| VI | 2008-S01-230 | Blood | 49     | <=2 | >16 | <=0.5 | 8   | <=0.5 | <=2 | <=0.03 |
| VI | 2008-S01-242 | Blood | 34     | <=2 | >16 | <=0.5 | 8   | <=0.5 | <=2 | 0.25   |
| VI | 2008-S01-243 | Blood | 63     | 4   | 4   | <=0.5 | 4   | <=0.5 | <=2 | <=0.03 |
| VI | 2008-S01-245 | Blood | 36     | <=2 | 4   | <=0.5 | 4   | <=0.5 | <=2 | <=0.03 |
| VI | 2008-S01-250 | Blood | 53     | 4   | 2   | <=0.5 | 8   | <=0.5 | <=2 | <=0.03 |
| VI | 2008-C01-005 | Urine | 12     | 4   | 2   | <=0.5 | 4   | <=0.5 | 4   | <=0.03 |
| VI | 2008-C01-006 | Urine | 0(10m) | <=2 | >16 | <=0.5 | >16 | <=0.5 | 16  | <=0.03 |
| VI | 2008-C01-012 | Urine | 80     | <=2 | 4   | <=0.5 | 4   | <=0.5 | <=2 | <=0.03 |
| VI | 2008-C01-023 | Urine | 28     | <=2 | >16 | 4     | 16  | 2     | >16 | >2     |
| VI | 2008-C01-026 | Urine | 41     | <=2 | 4   | <=0.5 | 4   | <=0.5 | <=2 | <=0.03 |
| VI | 2008-C01-027 | Urine | 55     | 16  | >16 | 2     | >16 | 1     | >16 | 0.25   |
| VI | 2008-C01-030 | Urine | 27     | <=2 | 4   | <=0.5 | 4   | <=0.5 | <=2 | <=0.03 |
| VI | 2008-C01-044 | Urine | 50     | <=2 | >16 | 16    | >16 | 4     | >16 | >2     |
| VI | 2008-C01-045 | Urine | 10     | <=2 | >16 | <=0.5 | 16  | <=0.5 | 4   | 0.5    |
| VI | 2008-C01-046 | Urine | 64     | 4   | >16 | <=0.5 | 16  | <=0.5 | 8   | 0.5    |
| VI | 2008-C01-047 | Urine | 70     | <=2 | >16 | <=0.5 | 8   | <=0.5 | <=2 | <=0.03 |
| VI | 2008-C02-002 | Urine | unk    | 4   | 4   | <=0.5 | 8   | <=0.5 | 4   | <=0.03 |
| VI | 2008-C02-003 | Urine | ink    | 8   | >16 | <=0.5 | 16  | 1     | >16 | >2     |
| VI | 2008-C02-015 | Urine | unk    | 4   | >16 | 8     | 8   | 8     | >16 | >2     |
| VI | 2008-C02-016 | Urine | unk    | 8   | >16 | 8     | >16 | 16    | >16 | >2     |
| VI | 2008-C02-017 | Urine | unk    | 4   | >16 | 2     | >16 | 8     | >16 | >2     |
| VI | 2008-C02-022 | Urine | unk    | <=2 | >16 | 2     | 8   | <=0.5 | >16 | >2     |
| VI | 2008-C02-024 | Urine | unk    | <=2 | >16 | >16   | >16 | >16   | >16 | >2     |
| VI | 2008-C02-030 | Urine | unk    | 4   | 4   | <=0.5 | 4   | <=0.5 | <=2 | <=0.03 |
| VI | 2008-C02-031 | Urine | unk    | <=2 | 4   | <=0.5 | 8   | <=0.5 | 4   | <=0.03 |
| VI | 2008-C02-033 | Urine | unk    | <=2 | 4   | <=0.5 | 8   | <=0.5 | <=2 | 0.12   |
| VI | 2008-C02-035 | Urine | unk    | 4   | 4   | <=0.5 | 4   | <=0.5 | <=2 | 0.06   |
| VI | 2008-C02-036 | Other | unk    | <=2 | 4   | <=0.5 | 4   | <=0.5 | <=2 | <=0.03 |
| VI | 2008-C02-040 | Urine | unk    | <=2 | 2   | <=0.5 | 4   | <=0.5 | <=2 | 0.12   |
| VI | 2008-C02-045 | Blood | unk    | <=2 | >16 | <=0.5 | 8   | <=0.5 | 8   | <=0.03 |
| VI | 2008-C02-205 | Blood | unk    | <=2 | >16 | <=0.5 | 8   | <=0.5 | <=2 | <=0.03 |
| VI | 2008-C02-211 | Blood | unk    | <=2 | 2   | <=0.5 | 4   | <=0.5 | <=2 | <=0.03 |



|    |              |       |    |     |     |       |     |       |     |        |
|----|--------------|-------|----|-----|-----|-------|-----|-------|-----|--------|
| VI | 2008-C02-220 | Blood |    | <=2 | >16 | <=0.5 | 8   | <=0.5 | 4   | <=0.03 |
| VI | 2008-C02-222 | Blood |    | <=2 | >16 | <=0.5 | 8   | <=0.5 | <=2 | 0.12   |
| VI | 2008-C02-223 | Blood |    | <=2 | 8   | <=0.5 | 8   | <=0.5 | 4   | <=0.03 |
| VI | 2008-C02-225 | Blood |    | <=2 | 2   | <=0.5 | 2   | <=0.5 | <=2 | <=0.03 |
| VI | 2008-C02-226 | Blood |    | <=2 | >16 | 16    | >16 | >16   | >16 | >2     |
| VI | 2008-C02-227 | Blood |    | <=2 | >16 | <=0.5 | 8   | <=0.5 | <=2 | <=0.03 |
| VI | 2008-C02-229 | Blood |    | <=2 | >16 | <=0.5 | 8   | <=0.5 | <=2 | <=0.03 |
| VI | 2008-C02-230 | Blood |    | <=2 | >16 | 16    | >16 | >16   | >16 | >2     |
| VI | 2008-C02-240 | Blood |    | <=2 | 4   | <=0.5 | 4   | <=0.5 | <=2 | <=0.03 |
| VI | 2008-C04-009 | Blood | 61 | <=2 | >16 | <=0.5 | 8   | <=0.5 | 4   | <=0.03 |
| VI | 2008-C04-013 | Urine | 0  | 8   | 4   | <=0.5 | 8   | <=0.5 | <=2 | <=0.03 |
| VI | 2008-C04-017 | Urine | 74 | <=2 | >16 | <=0.5 | 16  | <=0.5 | 16  | >2     |
| VI | 2008-C04-021 | Urine | 76 | 4   | >16 | <=0.5 | 16  | 2     | >16 | >2     |
| VI | 2008-C04-023 | Blood | 78 | <=2 | >16 | <=0.5 | 8   | <=0.5 | <=2 | 0.25   |
| VI | 2008-C04-031 | Urine | 80 | 4   | 4   | <=0.5 | 8   | <=0.5 | <=2 | <=0.03 |
| VI | 2008-C04-039 | Urine | 83 | 4   | >16 | 8     | >16 | >16   | >16 | >2     |
| VI | 2008-C04-042 | Blood | 60 | >32 | >16 | <=0.5 | 16  | <=0.5 | >16 | <=0.03 |
| VI | 2008-C04-044 | Urine | 46 | <=2 | >16 | <=0.5 | 16  | <=0.5 | 4   | 0.5    |
| VI | 2008-C04-045 | Urine | 36 | <=2 | >16 | <=0.5 | 16  | <=0.5 | 4   | 0.25   |
| VI | 2008-C04-225 | Blood | 75 | <=2 | >16 | <=0.5 | 16  | <=0.5 | 8   | 0.25   |
| VI | 2008-S05-001 | Urine | 84 | <=2 | >16 | <=0.5 | 16  | <=0.5 | 8   | >2     |
| VI | 2008-S05-003 | Blood | 90 | <=2 | <=1 | <=0.5 | 1   | <=0.5 | <=2 | <=0.03 |
| VI | 2008-S05-004 | Blood | 63 | <=2 | >16 | 16    | >16 | >16   | >16 | >2     |
| VI | 2008-S05-006 | Urine | 71 | 4   | >16 | <=0.5 | 8   | <=0.5 | 4   | >2     |
| VI | 2008-S05-009 | Blood | 71 | <=2 | >16 | <=0.5 | 4   | <=0.5 | <=2 | <=0.03 |
| VI | 2008-S05-012 | Urine | 72 | 4   | >16 | <=0.5 | 16  | <=0.5 | 16  | 0.25   |
| VI | 2008-S05-017 | Urine | 79 | <=2 | 2   | <=0.5 | 2   | <=0.5 | 4   | <=0.03 |
| VI | 2008-S05-018 | Urine | 42 | <=2 | <=1 | <=0.5 | 1   | <=0.5 | <=2 | <=0.03 |
| VI | 2008-S05-023 | Urine | 8  | <=2 | >16 | <=0.5 | 16  | <=0.5 | 4   | <=0.03 |
| VI | 2008-S05-024 | Urine | 0  | 8   | >16 | <=0.5 | 16  | <=0.5 | 4   | 2      |
| VI | 2008-S05-029 | Urine | 57 | <=2 | <=1 | <=0.5 | 1   | <=0.5 | <=2 | <=0.03 |
| VI | 2008-S05-031 | Urine | 21 | <=2 | >16 | <=0.5 | 8   | <=0.5 | <=2 | <=0.03 |
| VI | 2008-S05-032 | Urine | 68 | <=2 | >16 | <=0.5 | 8   | <=0.5 | 4   | 0.25   |
| VI | 2008-S05-033 | Other | 47 | <=2 | >16 | <=0.5 | 8   | <=0.5 | 4   | >2     |
| VI | 2008-S05-035 | Urine | 79 | <=2 | >16 | <=0.5 | 16  | <=0.5 | >16 | <=0.03 |
| VI | 2008-S05-038 | Urine | 77 | 4   | >16 | 8     | >16 | 8     | >16 | 0.25   |
| VI | 2008-S05-039 | Blood | 49 | <=2 | >16 | <=0.5 | 8   | <=0.5 | 4   | <=0.03 |
| VI | 2008-S05-040 | Blood | 57 | 4   | 4   | <=0.5 | 8   | <=0.5 | <=2 | <=0.03 |
| VI | 2008-S05-047 | Urine | 17 | <=2 | >16 | <=0.5 | >16 | <=0.5 | 4   | <=0.03 |
| VI | 2008-S05-048 | Urine | 64 | <=2 | >16 | <=0.5 | 8   | <=0.5 | <=2 | <=0.03 |
| VI | 2008-S05-204 | Blood | 76 | 4   | >16 | <=0.5 | 8   | <=0.5 | 4   | >2     |
| VI | 2008-S05-205 | Blood | 86 | 4   | >16 | <=0.5 | 8   | <=0.5 | <=2 | 0.25   |
| VI | 2008-S05-220 | Blood | 84 | <=2 | 4   | <=0.5 | 8   | <=0.5 | 4   | 0.25   |
| VI | 2008-S05-225 | Blood | 84 | <=2 | >16 | 1     | >16 | 2     | >16 | >2     |
| VI | 2008-S05-227 | Blood | 82 | <=2 | >16 | <=0.5 | 8   | <=0.5 | <=2 | <=0.03 |
| VI | 2008-S05-233 | Blood | 63 | <=2 | >16 | >16   | >16 | >16   | >16 | >2     |
| VI | 2008-S05-243 | Blood | 80 | <=2 | >16 | <=0.5 | 8   | <=0.5 | 4   | 0.25   |
| VI | 2008-S06-003 | Urine | 62 | 4   | >16 | >16   | >16 | >16   | >16 | >2     |
| VI | 2008-S06-008 | Urine | 32 | <=2 | >16 | >16   | 16  | 8     | >16 | 0.25   |
| VI | 2008-S06-012 | Urine | 56 | 4   | >16 | <=0.5 | 8   | <=0.5 | 4   | 0.25   |
| VI | 2008-S06-013 | Urine | 69 | <=2 | >16 | <=0.5 | >16 | <=0.5 | >16 | 0.25   |
| VI | 2008-S06-017 | Urine | 15 | <=2 | 4   | <=0.5 | 4   | <=0.5 | <=2 | <=0.03 |
| VI | 2008-S06-019 | Urine | 80 | <=2 | <=1 | <=0.5 | 2   | <=0.5 | <=2 | 0.12   |
| VI | 2008-S06-020 | Urine | 49 | <=2 | >16 | <=0.5 | 8   | <=0.5 | 4   | <=0.03 |
| VI | 2008-S06-023 | Urine | 74 | 4   | >16 | <=0.5 | 8   | <=0.5 | <=2 | <=0.03 |
| VI | 2008-S06-031 | Urine | 48 | <=2 | 4   | <=0.5 | 4   | <=0.5 | <=2 | <=0.03 |
| VI | 2008-S06-040 | Urine | 73 | <=2 | >16 | <=0.5 | 16  | <=0.5 | <=2 | 0.5    |
| VI | 2008-S06-041 | Urine | 24 | <=2 | 4   | <=0.5 | 4   | <=0.5 | <=2 | <=0.03 |
| VI | 2008-S06-042 | Urine | 64 | <=2 | 2   | <=0.5 | 2   | <=0.5 | <=2 | <=0.03 |
| VI | 2008-S06-047 | Urine | 26 | 4   | >16 | <=0.5 | 16  | <=0.5 | 4   | <=0.03 |
| VI | 2008-S06-065 | Urine | 70 | 4   | >16 | <=0.5 | 16  | <=0.5 | 8   | <=0.03 |

|    |              |       |    |     |     |       |     |       |     |        |
|----|--------------|-------|----|-----|-----|-------|-----|-------|-----|--------|
| VI | 2008-S06-107 | Other | 77 | 4   | >16 | 1     | 8   | <=0.5 | <=2 | <=0.03 |
| VI | 2008-S06-120 | Urine | 73 | 16  | >16 | 8     | >16 | >16   | >16 | >2     |
| VI | 2008-S06-126 | Urine | 93 | 4   | >16 | <=0.5 | 8   | <=0.5 | >16 | >2     |
| VI | 2008-S06-142 | Urine | 78 | 4   | 4   | <=0.5 | 4   | <=0.5 | <=2 | 0.25   |
| VI | 2008-S06-143 | Urine | 87 | 4   | 4   | <=0.5 | 4   | <=0.5 | 8   | >2     |
| VI | 2008-S06-146 | Urine | 81 | 4   | >16 | <=0.5 | 16  | <=0.5 | 16  | <=0.03 |
| VI | 2008-S06-159 | Urine | 69 | <=2 | >16 | <=0.5 | 8   | <=0.5 | 4   | >2     |
| VI | 2008-S06-167 | Urine | 91 | <=4 | >16 | >16   | >16 | >16   | >16 | >2     |
| VI | 2008-S06-170 | Blood | 56 | <=2 | >16 | 2     | 8   | <=0.5 | >16 | <=0.03 |
| VI | 2008-S06-171 | Urine | 92 | <=2 | 4   | <=0.5 | 4   | <=0.5 | <=2 | <=0.03 |
| VI | 2008-S06-175 | Urine | 83 | <=2 | >16 | <=0.5 | >16 | <=0.5 | 16  | >2     |
| VI | 2008-S06-177 | Blood | 83 | <=2 | 4   | <=0.5 | 4   | <=0.5 | <=2 | 0.25   |
| VI | 2008-S06-180 | Urine | 91 | <=2 | >16 | <=0.5 | 8   | <=0.5 | <=2 | 0.25   |
| VI | 2008-S06-203 | Blood | 68 | <=2 | 4   | <=0.5 | 4   | <=0.5 | <=2 | <=0.03 |
| VI | 2008-S06-204 | Other | 57 | <=2 | >16 | <=0.5 | 8   | <=0.5 | <=2 | 0.12   |
| VI | 2008-S06-214 | Blood | 85 | <=2 | >16 | <=0.5 | 8   | <=0.5 | 4   | <=0.03 |
| VI | 2008-S06-215 | Blood | 62 | 16  | >16 | 8     | >16 | 16    | >16 | >2     |
| VI | 2008-S06-216 | Blood | 82 | 4   | 4   | <=0.5 | 4   | <=0.5 | <=2 | >2     |
| VI | 2008-S06-217 | Blood | 62 | 4   | 8   | <=0.5 | 4   | <=0.5 | <=2 | <=0.03 |
| VI | 2008-S06-221 | Blood | 68 | <=2 | >16 | 8     | >16 | >16   | >16 | >2     |
| VI | 2008-S06-223 | Blood | 62 | 4   | >16 | <=0.5 | 16  | <=0.5 | 8   | <=0.03 |
| VI | 2008-S06-226 | Blood | 80 | 4   | >16 | <=0.5 | 8   | <=0.5 | <=2 | 0.12   |
| VI | 2008-S06-227 | Blood | 76 | <=2 | >16 | <=0.5 | 16  | <=0.5 | <=2 | <=0.03 |
| VI | 2008-S06-229 | Blood | 50 | 8   | >16 | <=0.5 | 8   | 1     | 8   | 2      |
| VI | 2008-S07-001 | Urine | 8  | 16  | >16 | <=0.5 | 8   | <=0.5 | 4   | <=0.03 |
| VI | 2008-S07-002 | Urine | 1  | <=2 | >16 | 8     | >16 | 16    | >16 | >2     |
| VI | 2008-S07-004 | Urine | 70 | 4   | 16  | <=0.5 | 8   | <=0.5 | 4   | 0.06   |
| VI | 2008-S07-007 | Urine | 29 | <=2 | >16 | <=0.5 | 16  | <=0.5 | 4   | 0.25   |
| VI | 2008-S07-009 | Urine | 80 | <=2 | >16 | 16    | >16 | >16   | >16 | >2     |
| VI | 2008-S07-011 | Urine | 31 | <=2 | >16 | <=0.5 | 8   | <=0.5 | 4   | <=0.03 |
| VI | 2008-S07-019 | Urine | 3  | <=2 | >16 | <=0.5 | 8   | <=0.5 | <=2 | <=0.03 |
| VI | 2008-S07-024 | Urine | 74 | 16  | >16 | >16   | >16 | >16   | >16 | >2     |
| VI | 2008-S07-025 | Urine | 59 | <=2 | >16 | <=0.5 | 8   | <=0.5 | 4   | <=0.03 |
| VI | 2008-S07-026 | Urine | 40 | 16  | >16 | >16   | >16 | >16   | >16 | >2     |
| VI | 2008-S07-034 | Urine | 70 | <=2 | >16 | 8     | 16  | 2     | >16 | >2     |
| VI | 2008-S07-043 | Other | 56 | <=2 | >16 | >16   | 8   | 4     | >16 | >2     |
| VI | 2008-S07-044 | Urine | 89 | <=2 | >16 | <=0.5 | 8   | <=0.5 | 4   | 0.25   |
| VI | 2008-S07-202 | Other | 70 | 4   | >16 | <=0.5 | 16  | <=0.5 | 8   | >2     |
| VI | 2008-S07-215 | Blood | 62 | 4   | >16 | <=0.5 | 8   | <=0.5 | <=2 | <=0.03 |
| VI | 2008-S07-222 | Blood | 18 | 4   | >16 | <=0.5 | 16  | <=0.5 | <=2 | 0.25   |
| VI | 2008-S07-224 | Blood | 82 | <=2 | >16 | <=0.5 | 8   | <=0.5 | <=2 | <=0.03 |
| VI | 2008-S07-232 | Blood | 74 | <=2 | 4   | <=0.5 | 8   | <=0.5 | <=2 | <=0.03 |
| VI | 2008-S07-239 | Blood | 53 | <=2 | >16 | 8     | >16 | 16    | >16 | 0.25   |
| VI | 2008-S07-247 | Blood | 70 | <=2 | 4   | <=0.5 | 4   | <=0.5 | <=2 | 0.06   |
| VI | 2008-S07-248 | Blood | 84 | 4   | >16 | <=0.5 | 16  | <=0.5 | 8   | >2     |
| VI | 2008-N05-001 | Urine | 31 | 4   | >16 | <=0.5 | 16  | <=0.5 | <=2 | <=0.03 |
| VI | 2008-N05-004 | Urine | 72 | 4   | 8   | <=0.5 | 8   | <=0.5 | <=2 | <=0.03 |
| VI | 2008-N05-008 | Urine | 26 | <=2 | >16 | <=0.5 | 16  | <=0.5 | 4   | <=0.03 |
| VI | 2008-N05-010 | Urine | 77 | <=2 | >16 | <=0.5 | 16  | <=0.5 | 16  | >2     |
| VI | 2008-N05-015 | Urine | 6  | <=2 | 8   | <=0.5 | 8   | <=0.5 | <=2 | <=0.03 |
| VI | 2008-N05-016 | Urine | 54 | <=2 | >16 | 2     | >16 | 8     | >16 | 0.06   |
| VI | 2008-N05-017 | Urine | 30 | 4   | >16 | <=0.5 | 8   | <=0.5 | <=2 | <=0.03 |
| VI | 2008-N05-018 | Urine | 82 | <=2 | >16 | <=0.5 | 16  | <=0.5 | 8   | <=0.03 |
| VI | 2008-N05-019 | Urine | 34 | <=2 | >16 | <=0.5 | 8   | <=0.5 | <=2 | <=0.03 |
| VI | 2008-N05-020 | Urine | 31 | <=2 | 8   | <=0.5 | 8   | <=0.5 | <=2 | <=0.03 |
| VI | 2008-N05-021 | Urine | 27 | 4   | >16 | <=0.5 | >16 | <=0.5 | 16  | <=0.03 |
| VI | 2008-N05-022 | Urine | 63 | <=2 | 4   | <=0.5 | 4   | <=0.5 | <=2 | 0.06   |
| VI | 2008-N05-027 | Urine | 83 | <=2 | 2   | <=0.5 | 4   | <=0.5 | <=2 | <=0.03 |
| VI | 2008-N05-029 | Urine | 67 | 4   | >16 | <=0.5 | 16  | <=0.5 | 4   | >2     |
| VI | 2008-N05-031 | Urine | 39 | <=2 | 4   | <=0.5 | 4   | <=0.5 | <=2 | <=0.03 |
| VI | 2008-N05-032 | Urine | 47 | <=2 | >16 | <=0.5 | 8   | <=0.5 | <=2 | 0.12   |

|    |              |       |    |     |     |       |     |       |     |        |
|----|--------------|-------|----|-----|-----|-------|-----|-------|-----|--------|
| VI | 2008-N05-037 | Urine | 53 | <=2 | 4   | <=0.5 | 4   | <=0.5 | <=2 | <=0.03 |
| VI | 2008-N05-050 | Urine | 53 | 4   | 8   | <=0.5 | 8   | <=0.5 | <=2 | >2     |
| VI | 2008-N05-212 | Blood | 46 | <=2 | 4   | <=0.5 | 4   | <=0.5 | <=2 | 0.25   |
| VI | 2008-N05-223 | Blood | 64 | <=2 | >16 | <=0.5 | 8   | <=0.5 | <=2 | <=0.03 |
| VI | 2008-N05-230 | Blood | 38 | <=2 | >16 | <=0.5 | 16  | <=0.5 | 16  | 0.25   |
| VI | 2008-N06-001 | Urine | 81 | <=2 | >16 | <=0.5 | 8   | <=0.5 | <=2 | >2     |
| VI | 2008-N06-004 | Urine | 48 | 4   | >16 | <=0.5 | 16  | <=0.5 | 8   | 0.25   |
| VI | 2008-N06-006 | Urine | 76 | 4   | >16 | <=0.5 | 4   | <=0.5 | <=2 | <=0.03 |
| VI | 2008-N06-007 | Urine | 37 | 4   | >16 | <=0.5 | 8   | <=0.5 | <=2 | <=0.03 |
| VI | 2008-N06-010 | Urine | 78 | 8   | >16 | <=0.5 | 8   | <=0.5 | 4   | 0.12   |
| VI | 2008-N06-018 | Urine | 30 | 4   | >16 | <=0.5 | 8   | <=0.5 | 4   | <=0.03 |
| VI | 2008-N06-020 | Urine | 82 | <=2 | >16 | 4     | 16  | 2     | >16 | >2     |
| VI | 2008-N06-021 | Urine | 49 | <=2 | 4   | <=0.5 | 4   | <=0.5 | <=2 | 0.25   |
| VI | 2008-N06-022 | Urine | 77 | 4   | >16 | <=0.5 | 8   | <=0.5 | 4   | >2     |
| VI | 2008-N06-023 | Urine | 39 | 4   | >16 | <=0.5 | 8   | <=0.5 | 4   | >2     |
| VI | 2008-N06-031 | Blood | 91 | <=2 | 4   | <=0.5 | 8   | <=0.5 | <=2 | <=0.03 |
| VI | 2008-N06-032 | Blood | 65 | <=2 | >16 | <=0.5 | 8   | <=0.5 | <=2 | <=0.03 |
| VI | 2008-N06-043 | Urine | 85 | 4   | 4   | <=0.5 | 4   | <=0.5 | <=2 | <=0.03 |
| VI | 2008-N06-044 | Urine | 37 | <=2 | <=1 | <=0.5 | 1   | <=0.5 | <=2 | <=0.03 |
| VI | 2008-N06-045 | Urine | 28 | <=2 | >16 | <=0.5 | 8   | <=0.5 | 4   | 0.12   |
| VI | 2008-N06-201 | Blood | 57 | <=2 | 4   | <=0.5 | 4   | <=0.5 | <=2 | <=0.03 |
| VI | 2008-N06-205 | Blood | 80 | <=2 | 4   | <=0.5 | 4   | <=0.5 | <=2 | 0.25   |
| VI | 2008-N06-216 | Blood | 55 | 8   | >16 | >16   | 16  | >16   | >16 | >2     |
| VI | 2008-N06-217 | Blood | 65 | <=2 | 4   | <=0.5 | 4   | <=0.5 | <=2 | <=0.03 |
| VI | 2008-N06-218 | Blood | 89 | 4   | >16 | <=0.5 | 8   | <=0.5 | 4   | 0.12   |
| VI | 2008-N06-226 | Other | 76 | <=2 | 8   | <=0.5 | 8   | <=0.5 | 16  | 0.12   |
| VI | 2008-N06-231 | Blood | 82 | <=2 | 4   | <=0.5 | 4   | <=0.5 | <=2 | 0.5    |
| VI | 2008-N06-234 | Blood | 69 | <=2 | 4   | <=0.5 | 4   | <=0.5 | <=2 | 0.25   |
| VI | 2008-N06-236 | Blood | 76 | 4   | >16 | <=0.5 | 8   | <=0.5 | <=2 | 0.12   |
| VI | 2008-N06-237 | Blood | 53 | <=2 | 2   | <=0.5 | 2   | <=0.5 | <=2 | <=0.03 |
| VI | 2008-N06-249 | Blood | 47 | 4   | >16 | <=0.5 | 8   | <=0.5 | 8   | 0.25   |
| VI | 2008-N07-001 | Blood | 64 | <=2 | >16 | <=0.5 | 8   | <=0.5 | <=2 | <=0.03 |
| VI | 2008-N07-002 | Urine | 44 | <=2 | >16 | <=0.5 | 8   | <=0.5 | <=2 | 0.12   |
| VI | 2008-N07-007 | Other | 42 | <=2 | >16 | 8     | >16 | 16    | >16 | 0.5    |
| VI | 2008-N07-010 | Blood | 58 | <=2 | >16 | <=0.5 | 8   | <=0.5 | <=2 | 0.25   |
| VI | 2008-N07-011 | Urine | 57 | 4   | >16 | <=0.5 | 8   | <=0.5 | <=2 | <=0.03 |
| VI | 2008-N07-013 | Blood | 82 | <=2 | >16 | <=0.5 | 16  | <=0.5 | 4   | 1      |
| VI | 2008-N07-023 | Urine | 83 | >32 | >16 | >16   | >16 | >16   | >16 | >2     |
| VI | 2008-N07-025 | Urine | 49 | 4   | >16 | <=0.5 | 8   | <=0.5 | 8   | 0.25   |
| VI | 2008-N07-026 | Blood | 75 | <=2 | >16 | <=0.5 | 8   | <=0.5 | 4   | >2     |
| VI | 2008-N07-027 | Urine | 36 | <=2 | >16 | <=0.5 | 16  | <=0.5 | <=2 | <=0.03 |
| VI | 2008-N07-029 | Urine | 30 | <=2 | >16 | <=0.5 | 8   | <=0.5 | <=2 | 1      |
| VI | 2008-N07-031 | Urine | 83 | <=2 | >16 | <=0.5 | 8   | <=0.5 | 4   | 0.25   |
| VI | 2008-N07-032 | Urine | 20 | 4   | 4   | <=0.5 | 4   | <=0.5 | <=2 | <=0.03 |
| VI | 2008-N07-033 | Urine | 80 | <=2 | >16 | >16   | >16 | >16   | >16 | 1      |
| VI | 2008-N07-035 | Urine | 29 | 4   | >16 | <=0.5 | 16  | <=0.5 | 8   | >2     |
| VI | 2008-N07-042 | Urine | 49 | <=2 | >16 | 8     | >16 | 8     | >16 | >2     |
| VI | 2008-N07-044 | Urine | 54 | 4   | >16 | <=0.5 | 8   | <=0.5 | 4   | <=0.03 |
| VI | 2008-N07-206 | Blood | 76 | <=2 | >16 | 4     | >16 | 16    | >16 | <=0.03 |
| VI | 2008-N07-212 | Blood | 91 | 8   | >16 | <=0.5 | 16  | <=0.5 | 8   | 1      |
| VI | 2008-N07-216 | Blood | 26 | <=2 | >16 | <=0.5 | 8   | <=0.5 | <=2 | <=0.03 |
| VI | 2008-N07-219 | Blood | 85 | 4   | >16 | >16   | >16 | 4     | >16 | 0.25   |
| VI | 2008-N07-228 | Blood | 70 | <=2 | >16 | <=0.5 | 4   | <=0.5 | <=2 | 0.25   |
| VI | 2008-N07-231 | Blood | 24 | 8   | >16 | <=0.5 | 8   | <=0.5 | <=2 | 0.25   |
| VI | 2008-N07-237 | Blood | 60 | 4   | >16 | <=0.5 | 8   | <=0.5 | <=2 | <=0.03 |
| VI | 2008-N07-242 | Blood | 72 | 4   | 4   | <=0.5 | 8   | <=0.5 | <=2 | <=0.03 |
| VI | 2008-N07-244 | Blood | 65 | <=2 | 4   | <=0.5 | 8   | <=0.5 | <=2 | <=0.03 |
| VI | 2008-N07-250 | Blood | 78 | <=2 | >16 | <=0.5 | 8   | <=0.5 | 4   | <=0.03 |
| VI | 2008-S08-001 | Urine | 48 | 4   | 4   | <=0.5 | 4   | <=0.5 | <=2 | 0.25   |
| VI | 2008-S08-002 | Urine | 51 | <=2 | >16 | <=0.5 | 8   | <=0.5 | <=2 | <=0.03 |
| VI | 2008-S08-006 | Urine | 46 | <=2 | >16 | <=0.5 | 16  | <=0.5 | 16  | <=0.03 |

|    |              |       |    |     |     |       |     |       |     |        |
|----|--------------|-------|----|-----|-----|-------|-----|-------|-----|--------|
| VI | 2008-S08-007 | Urine | 21 | <=2 | >16 | <=0.5 | 16  | <=0.5 | 4   | <=0.03 |
| VI | 2008-S08-010 | Urine | 93 | <=2 | >16 | <=0.5 | 16  | <=0.5 | 4   | <=0.03 |
| VI | 2008-S08-011 | Urine | 80 | <=2 | >16 | >16   | >16 | >16   | >16 | >2     |
| VI | 2008-S08-015 | Urine | 53 | <=2 | >16 | <=0.5 | 8   | <=0.5 | 4   | 0.25   |
| VI | 2008-S08-019 | Urine | 19 | 4   | 4   | <=0.5 | 4   | <=0.5 | 4   | <=0.03 |
| VI | 2008-S08-020 | Urine | 49 | <=2 | >16 | <=0.5 | >16 | 2     | >16 | 0.25   |
| VI | 2008-S08-023 | Urine | 72 | 4   | 4   | <=0.5 | 4   | <=0.5 | <=2 | <=0.03 |
| VI | 2008-S08-024 | Urine | 80 | <=2 | >16 | <=0.5 | 8   | <=0.5 | 8   | <=0.03 |
| VI | 2008-S08-027 | Urine | 43 | <=2 | >16 | <=0.5 | 16  | <=0.5 | 8   | 0.25   |
| VI | 2008-S08-029 | Urine | 30 | <=2 | >16 | <=0.5 | 16  | <=0.5 | 4   | 0.12   |
| VI | 2008-S08-033 | Urine | 81 | <=2 | >16 | <=0.5 | 8   | <=0.5 | 4   | >2     |
| VI | 2008-S08-035 | Urine | 70 | 8   | >16 | <=0.5 | 8   | <=0.5 | 4   | >2     |
| VI | 2008-S08-036 | Urine | 82 | >32 | >16 | >16   | 8   | 2     | >16 | 0.12   |
| VI | 2008-S08-037 | Urine | 62 | <=2 | >16 | >16   | >16 | >16   | >16 | >2     |
| VI | 2008-S08-039 | Urine | 39 | <=2 | >16 | <=0.5 | 8   | <=0.5 | 4   | <=0.03 |
| VI | 2008-S08-042 | Urine | 68 | <=2 | >16 | >16   | >16 | >16   | >16 | >2     |
| VI | 2008-S08-043 | Urine | 77 | <=2 | >16 | 16    | >16 | >16   | >16 | <=0.03 |
| VI | 2008-S08-044 | Urine | 86 | <=2 | 4   | <=0.5 | 4   | <=0.5 | <=2 | 0.06   |
| VI | 2008-S08-050 | Urine | 85 | <=2 | 4   | <=0.5 | 8   | <=0.5 | <=2 | <=0.03 |
| VI | 2008-S08-076 | Urine | 62 | <=2 | >16 | <=0.5 | 8   | <=0.5 | <=2 | 0.25   |
| VI | 2008-S08-079 | Urine | 46 | <=2 | >16 | >16   | 16  | >16   | >16 | >2     |
| VI | 2008-S08-123 | Urine | 64 | <=2 | >16 | 8     | >16 | 16    | >16 | >2     |
| VI | 2008-S08-181 | Urine | 8  | 4   | >16 | <=0.5 | 16  | <=0.5 | 8   | 0.25   |
| VI | 2008-E02-004 | Urine | 22 | <=2 | 4   | <=0.5 | 4   | <=0.5 | <=2 | <=0.03 |
| VI | 2008-E02-009 | Urine | 71 | <=2 | 4   | <=0.5 | 4   | <=0.5 | <=2 | <=0.03 |
| VI | 2008-E02-016 | Urine | 69 | <=2 | >16 | <=0.5 | 8   | <=0.5 | 4   | <=0.03 |
| VI | 2008-E02-018 | Blood | 42 | 8   | >16 | <=0.5 | 8   | <=0.5 | 4   | <=0.03 |
| VI | 2008-E02-019 | Blood | 68 | 4   | 4   | <=0.5 | 4   | <=0.5 | <=2 | 0.25   |
| VI | 2008-E02-021 | Urine | 82 | <=2 | >16 | <=0.5 | 16  | <=0.5 | 4   | >2     |
| VI | 2008-E02-022 | Urine | 76 | <=2 | >16 | <=0.5 | 8   | <=0.5 | 4   | <=0.03 |
| VI | 2008-E02-025 | Urine | 62 | 4   | >16 | <=0.5 | 16  | <=0.5 | <=2 | 0.25   |
| VI | 2008-E02-026 | Urine | 93 | <=2 | 4   | <=0.5 | 4   | <=0.5 | <=2 | <=0.03 |
| VI | 2008-E02-030 | Blood | 54 | 8   | >16 | <=0.5 | 16  | <=0.5 | 8   | 0.12   |
| VI | 2008-E02-031 | Urine | 30 | <=2 | 2   | <=0.5 | 4   | <=0.5 | <=2 | <=0.03 |
| VI | 2008-E02-033 | Urine | 25 | <=2 | >16 | <=0.5 | 8   | <=0.5 | <=2 | 0.12   |
| VI | 2008-E02-038 | Urine | 83 | <=2 | >16 | 8     | 16  | 2     | >16 | <=0.03 |
| VI | 2008-E02-039 | Urine | 72 | <=2 | >16 | <=0.5 | 16  | <=0.5 | 4   | <=0.03 |
| VI | 2008-E02-043 | Urine | 33 | 4   | 4   | <=0.5 | 8   | <=0.5 | <=2 | <=0.03 |
| VI | 2008-E02-044 | Urine | 90 | <=2 | >16 | <=0.5 | 8   | <=0.5 | <=2 | <=0.03 |
| VI | 2008-E02-045 | Urine | 76 | <=2 | 2   | <=0.5 | 4   | <=0.5 | <=2 | <=0.03 |
| VI | 2008-E02-203 | Other | 30 | 4   | 2   | <=0.5 | 2   | <=0.5 | <=2 | <=0.03 |
| VI | 2008-E02-208 | Blood | 58 | <=2 | >16 | <=0.5 | 16  | <=0.5 | <=2 | 0.5    |
| VI | 2008-E02-209 | Blood | 57 | <=2 | >16 | <=0.5 | 16  | <=0.5 | 4   | <=0.03 |
| VI | 2008-E02-210 | Blood | 72 | <=2 | 8   | <=0.5 | 4   | <=0.5 | <=2 | 0.25   |
| VI | 2008-N08-002 | Urine | 19 | <=2 | >16 | <=0.5 | 8   | <=0.5 | <=2 | 0.5    |
| VI | 2008-N08-005 | Urine | 76 | <=2 | >16 | <=0.5 | 8   | <=0.5 | 4   | 1      |
| VI | 2008-N08-007 | Urine | 74 | <=2 | >16 | <=0.5 | >16 | <=0.5 | >16 | 0.25   |
| VI | 2008-N08-008 | Urine | 61 | <=2 | >16 | <=0.5 | 8   | <=0.5 | <=2 | <=0.03 |
| VI | 2008-N08-014 | Urine | 87 | <=2 | >16 | >16   | >16 | >16   | >16 | 0.25   |
| VI | 2008-N08-015 | Urine | 0  | <=2 | >16 | <=0.5 | 8   | <=0.5 | <=2 | 0.25   |
| VI | 2008-N08-018 | Urine | 83 | <=2 | 2   | <=0.5 | 4   | <=0.5 | <=2 | 0.25   |
| VI | 2008-N08-023 | Urine | 42 | 8   | >16 | <=0.5 | 8   | <=0.5 | 4   | 0.12   |
| VI | 2008-N08-027 | Urine | 36 | <=2 | 2   | <=0.5 | 4   | <=0.5 | <=2 | <=0.03 |
| VI | 2008-N08-028 | Urine | 40 | <=2 | >16 | <=0.5 | 8   | <=0.5 | 4   | <=0.03 |
| VI | 2008-N08-029 | Urine | 49 | <=2 | 4   | <=0.5 | 4   | <=0.5 | <=2 | 0.25   |
| VI | 2008-N08-030 | Urine | 58 | 4   | >16 | <=0.5 | 16  | <=0.5 | 4   | 0.12   |
| VI | 2008-N08-032 | Urine | 54 | <=2 | 4   | <=0.5 | 4   | <=0.5 | <=2 | <=0.03 |
| VI | 2008-N08-038 | Blood | 76 | 4   | >16 | <=0.5 | 16  | <=0.5 | 8   | <=0.03 |
| VI | 2008-N08-039 | Blood | 40 | <=2 | 2   | <=0.5 | 4   | <=0.5 | <=2 | <=0.03 |
| VI | 2008-N08-041 | Blood | 74 | <=2 | >16 | <=0.5 | 8   | <=0.5 | 4   | >2     |
| VI | 2008-N08-044 | Urine | 45 | <=2 | >16 | 4     | >16 | 8     | >16 | <=0.03 |

|    |              |       |    |     |     |       |     |       |     |        |
|----|--------------|-------|----|-----|-----|-------|-----|-------|-----|--------|
| VI | 2008-N08-047 | Urine | 0  | <=2 | >16 | <=0.5 | 8   | <=0.5 | 4   | <=0.03 |
| VI | 2008-N08-211 | Blood | 74 | <=2 | 2   | <=0.5 | 4   | <=0.5 | <=2 | 0.25   |
| VI | 2008-N08-219 | Blood | 0  | <=2 | >16 | <=0.5 | 16  | <=0.5 | 8   | 0.25   |
| VI | 2008-S09-009 | Urine | 68 | 4   | >16 | <=0.5 | 4   | <=0.5 | >16 | 0.06   |
| VI | 2008-S09-012 | Urine | 20 | 4   | >16 | <=0.5 | 8   | <=0.5 | <=2 | <=0.03 |
| VI | 2008-S09-013 | Urine | 21 | <=2 | >16 | <=0.5 | 8   | <=0.5 | <=2 | <=0.03 |
| VI | 2008-S09-014 | Urine | 55 | <=2 | >16 | <=0.5 | 8   | <=0.5 | <=2 | <=0.03 |
| VI | 2008-S09-019 | Blood | 69 | 4   | <=1 | <=0.5 | 2   | <=0.5 | <=2 | 0.12   |
| VI | 2008-S09-023 | Blood | 58 | 4   | >16 | <=0.5 | 16  | <=0.5 | 8   | <=0.03 |
| VI | 2008-S09-025 | Blood | 73 | 8   | >16 | <=0.5 | 8   | <=0.5 | 8   | >2     |
| VI | 2008-S09-027 | Urine | 52 | <=2 | 4   | <=0.5 | 4   | <=0.5 | <=2 | <=0.03 |
| VI | 2008-S09-029 | Urine | 41 | <=2 | >16 | <=0.5 | 16  | <=0.5 | 4   | <=0.03 |
| VI | 2008-S09-030 | Blood | 58 | <=2 | >16 | <=0.5 | 8   | <=0.5 | <=2 | 0.12   |
| VI | 2008-S09-035 | Urine | 71 | 4   | 4   | <=0.5 | 4   | <=0.5 | <=2 | <=0.03 |
| VI | 2008-S09-036 | Urine | 80 | 4   | 2   | <=0.5 | 4   | <=0.5 | 4   | <=0.03 |
| VI | 2008-S09-037 | Urine | 79 | 8   | >16 | <=0.5 | 8   | <=0.5 | <=2 | <=0.03 |
| VI | 2008-S09-038 | Blood | 76 | <=2 | >16 | <=0.5 | 8   | <=0.5 | <=2 | 0.25   |
| VI | 2008-S09-043 | Urine | 61 | <=2 | >16 | <=0.5 | 8   | <=0.5 | <=2 | 0.25   |
| VI | 2008-S09-044 | Urine | 33 | <=2 | >16 | <=0.5 | 8   | <=0.5 | <=2 | 0.25   |
| VI | 2008-S09-046 | Blood | 78 | <=2 | >16 | >16   | >16 | >16   | >16 | >2     |
| VI | 2008-S09-047 | Urine | 78 | <=2 | 2   | <=0.5 | 4   | <=0.5 | <=2 | <=0.03 |
| VI | 2008-S09-050 | Urine | 67 | <=2 | >16 | <=0.5 | 8   | <=0.5 | 4   | >2     |
| VI | 2008-S09-186 | Urine | 5  | 4   | >16 | <=0.5 | 8   | <=0.5 | <=2 | 0.25   |
| VI | 2008-S09-204 | Blood | 78 | <=2 | 4   | <=0.5 | 4   | <=0.5 | <=2 | <=0.03 |
| VI | 2008-S09-205 | Blood | 81 | <=2 | 4   | <=0.5 | 4   | <=0.5 | <=2 | <=0.03 |
| VI | 2008-S09-209 | Blood | 73 | <=2 | >16 | <=0.5 | 8   | <=0.5 | <=2 | <=0.03 |
| VI | 2008-S09-210 | Blood | 76 | <=2 | >16 | <=0.5 | 8   | <=0.5 | <=2 | 0.06   |
| VI | 2008-S09-214 | Blood | 49 | <=2 | >16 | <=0.5 | 8   | <=0.5 | <=2 | <=0.03 |
| VI | 2008-S09-216 | Blood | 83 | 8   | >16 | >16   | >16 | >16   | >16 | >2     |
| VI | 2008-S09-218 | Blood | 51 | <=2 | 4   | <=0.5 | 8   | <=0.5 | <=2 | <=0.03 |
| VI | 2008-S09-223 | Blood | 43 | <=2 | >16 | <=0.5 | 8   | <=0.5 | 4   | >2     |
| VI | 2008-S09-224 | Blood | 64 | <=2 | >16 | <=0.5 | 16  | <=0.5 | 4   | 0.25   |
| VI | 2008-S09-225 | Blood | 66 | 4   | >16 | <=0.5 | 8   | <=0.5 | 8   | >2     |
| VI | 2008-S09-230 | Blood | 57 | 4   | >16 | <=0.5 | 8   | <=0.5 | <=2 | <=0.03 |
| VI | 2008-S09-235 | Blood | 75 | 4   | >16 | >16   | >16 | >16   | >16 | >2     |
| VI | 2008-S09-240 | Blood | 58 | <=2 | >16 | <=0.5 | 8   | <=0.5 | <=2 | 1      |
| VI | 2008-S09-241 | Blood | 85 | <=2 | >16 | <=0.5 | 8   | <=0.5 | <=2 | <=0.03 |
| VI | 2008-S09-242 | Blood | 53 | 4   | 4   | <=0.5 | 4   | <=0.5 | <=2 | <=0.03 |
| VI | 2008-S09-246 | Blood | 76 | 8   | >16 | >16   | 16  | 16    | >16 | >2     |
| VI | 2008-E03-003 | Urine | 89 | <=2 | >16 | <=0.5 | 8   | <=0.5 | <=2 | 0.25   |
| VI | 2008-E03-004 | Urine | 88 | 8   | >16 | <=0.5 | 16  | 1     | 16  | >2     |
| VI | 2008-E03-008 | Urine | 98 | <=2 | >16 | <=0.5 | 16  | <=0.5 | 8   | 0.06   |
| VI | 2008-E03-011 | Urine | 77 | <=2 | >16 | <=0.5 | 16  | <=0.5 | 4   | <=0.03 |
| VI | 2008-E03-013 | Urine | 98 | <=2 | >16 | <=0.5 | 8   | <=0.5 | 4   | >2     |
| VI | 2008-E03-016 | Urine | 46 | <=2 | >16 | <=0.5 | 16  | <=0.5 | 4   | <=0.03 |
| VI | 2008-E03-017 | Urine | 88 | 4   | 4   | <=0.5 | 4   | <=0.5 | <=2 | <=0.03 |
| VI | 2008-E03-019 | Urine | 67 | 8   | >16 | <=0.5 | 8   | <=0.5 | 4   | <=0.03 |
| VI | 2008-E03-030 | Blood | 54 | <=2 | >16 | <=0.5 | 8   | <=0.5 | <=2 | <=0.03 |
| VI | 2008-E03-031 | Blood | 59 | <=2 | 4   | <=0.5 | 8   | <=0.5 | 4   | <=0.03 |
| VI | 2008-E03-033 | Urine | 41 | <=2 | >16 | <=0.5 | 8   | <=0.5 | 8   | <=0.03 |
| VI | 2008-E03-034 | Urine | 84 | 4   | >16 | <=0.5 | 16  | <=0.5 | 8   | 0.25   |
| VI | 2008-E03-039 | Urine | 86 | 4   | >16 | <=0.5 | 8   | <=0.5 | <=2 | 1      |
| VI | 2008-E03-041 | Urine | 81 | <=2 | 4   | <=0.5 | 4   | <=0.5 | <=2 | <=0.03 |
| VI | 2008-E03-042 | Urine | 77 | <=2 | 2   | <=0.5 | 4   | <=0.5 | <=2 | <=0.03 |
| VI | 2008-E03-045 | Urine | 69 | <=2 | >16 | <=0.5 | 16  | <=0.5 | 8   | >2     |
| VI | 2008-E03-048 | Urine | 93 | 4   | >16 | <=0.5 | 8   | <=0.5 | 4   | >2     |
| VI | 2008-E03-049 | Urine | 49 | <=2 | >16 | <=0.5 | 8   | <=0.5 | <=2 | <=0.03 |
| VI | 2008-E03-231 | Blood | 78 | <=2 | >16 | 8     | >16 | 16    | >16 | >2     |
| VI | 2008-E03-235 | Blood | 84 | <=2 | >16 | <=0.5 | 8   | <=0.5 | 4   | 0.25   |
| VI | 2008-C06-002 | Blood | 82 | 4   | >16 | <=0.5 | 8   | <=0.5 | <=2 | <=0.03 |
| VI | 2008-C06-006 | Urine | 46 | 4   | >16 | <=0.5 | 16  | <=0.5 | >16 | <=0.03 |

|    |              |       |    |     |     |       |     |       |     |        |
|----|--------------|-------|----|-----|-----|-------|-----|-------|-----|--------|
| VI | 2008-C06-017 | Urine | 70 | 16  | >16 | 16    | 16  | 4     | >16 | >2     |
| VI | 2008-C06-018 | Urine | 25 | <=2 | >16 | >16   | >16 | >16   | >16 | >2     |
| VI | 2008-C06-025 | Urine | 60 | 4   | >16 | <=0.5 | 16  | <=0.5 | >16 | >2     |
| VI | 2008-C06-027 | Urine | 27 | <=2 | >16 | <=0.5 | 8   | <=0.5 | 4   | 0.25   |
| VI | 2008-C06-032 | Urine | 66 | <=2 | >16 | <=0.5 | 8   | <=0.5 | <=2 | >2     |
| VI | 2008-C06-034 | Blood | 64 | 4   | >16 | <=0.5 | 8   | <=0.5 | <=2 | <=0.03 |
| VI | 2008-C06-039 | Urine | 33 | <=2 | >16 | <=0.5 | 4   | <=0.5 | <=2 | <=0.03 |
| VI | 2008-C06-042 | Urine | 52 | <=2 | 2   | <=0.5 | 4   | <=0.5 | <=2 | <=0.03 |
| VI | 2008-C06-043 | Urine | 80 | <=2 | >16 | <=0.5 | 8   | <=0.5 | <=2 | 0.25   |
| VI | 2008-C06-045 | Urine | 25 | <=2 | 4   | <=0.5 | 4   | <=0.5 | <=2 | <=0.03 |
| VI | 2008-C06-199 | Urine | 2  | <=2 | >16 | <=0.5 | 8   | <=0.5 | 4   | 0.5    |
| VI | 2008-C06-211 | Blood | 73 | <=2 | >16 | <=0.5 | 16  | <=0.5 | 8   | <=0.03 |
| VI | 2008-C07-001 | Blood | 42 | 4   | >16 | 8     | 8   | 4     | >16 | >2     |
| VI | 2008-C07-003 | Blood | 81 | 4   | >16 | <=0.5 | >16 | 2     | >16 | <=0.03 |
| VI | 2008-C07-005 | Blood | 81 | <=2 | 2   | <=0.5 | 4   | <=0.5 | <=2 | <=0.03 |
| VI | 2008-C07-007 | Blood | 45 | <=2 | >16 | <=0.5 | 16  | <=0.5 | 8   | 0.25   |
| VI | 2008-C07-008 | Blood | 93 | 8   | >16 | <=0.5 | 8   | <=0.5 | >16 | >2     |
| VI | 2008-C07-009 | Blood | 74 | 8   | >16 | <=0.5 | 8   | <=0.5 | 8   | >2     |
| VI | 2008-C07-011 | Blood | 70 | <=2 | 4   | <=0.5 | 8   | <=0.5 | <=2 | >2     |
| VI | 2008-C07-012 | Blood | 29 | 4   | >16 | <=0.5 | 16  | <=0.5 | 8   | 0.25   |
| VI | 2008-C07-013 | Blood | 83 | 8   | 2   | <=0.5 | 4   | <=0.5 | <=2 | 0.12   |
| VI | 2008-C07-014 | Blood | 66 | 4   | >16 | 4     | >16 | 16    | >16 | >2     |
| VI | 2008-C07-015 | Blood | 98 | <=2 | >16 | <=0.5 | 8   | <=0.5 | <=2 | <=0.03 |
| VI | 2008-C07-016 | Blood | 76 | <=2 | >16 | 16    | >16 | >16   | >16 | >2     |
| VI | 2008-C07-017 | Blood | 61 | <=2 | 4   | <=0.5 | 4   | <=0.5 | <=2 | <=0.03 |
| VI | 2008-C07-018 | Blood | 67 | 4   | >16 | <=0.5 | 4   | <=0.5 | <=2 | 1      |
| VI | 2008-C07-020 | Blood | 77 | <=2 | >16 | 1     | >16 | 1     | 8   | <=0.03 |
| VI | 2008-C07-021 | Blood | 44 | 4   | >16 | <=0.5 | 8   | <=0.5 | <=2 | 0.25   |
| VI | 2008-C07-022 | Blood | 53 | <=2 | 4   | <=0.5 | 4   | <=0.5 | <=2 | <=0.03 |
| VI | 2008-C07-024 | Blood | 87 | 4   | >16 | <=0.5 | 16  | <=0.5 | 8   | 0.12   |
| VI | 2008-C07-026 | Blood | 73 | <=2 | 4   | <=0.5 | 2   | <=0.5 | <=2 | <=0.03 |
| VI | 2008-C07-028 | Blood | 82 | 4   | 2   | <=0.5 | 2   | <=0.5 | <=2 | <=0.03 |
| VI | 2008-C07-029 | Blood | 72 | <=2 | >16 | <=0.5 | 8   | <=0.5 | 4   | <=0.03 |
| VI | 2008-C07-035 | Blood | 71 | <=2 | >16 | 16    | >16 | >16   | >16 | >2     |
| VI | 2008-C07-044 | Blood | 86 | <=2 | 4   | <=0.5 | 4   | <=0.5 | <=2 | <=0.03 |
| VI | 2008-C07-049 | Blood | 78 | <=2 | >16 | 16    | >16 | >16   | >16 | >2     |
| VI | 2008-C07-205 | Blood | 64 | <=2 | >16 | <=0.5 | 8   | <=0.5 | <=2 | <=0.03 |
| VI | 2008-C07-209 | Blood | 75 | 4   | <=1 | <=0.5 | 2   | <=0.5 | <=2 | <=0.03 |
| VI | 2008-C07-214 | Blood | 88 | <=2 | >16 | 8     | >16 | 8     | >16 | >2     |
| VI | 2008-C07-216 | Blood | 57 | 4   | >16 | <=0.5 | 8   | <=0.5 | <=2 | <=0.03 |
| VI | 2008-C07-218 | Blood | 71 | 4   | 2   | <=0.5 | 4   | <=0.5 | <=2 | 0.06   |
| VI | 2008-C07-234 | Blood | 81 | <=2 | 4   | <=0.5 | 4   | <=0.5 | <=2 | 0.06   |
| VI | 2008-C07-237 | Blood | 74 | <=2 | 2   | <=0.5 | 4   | <=0.5 | <=2 | <=0.03 |
| VI | 2008-C07-240 | Blood | 58 | <=2 | >16 | <=0.5 | 8   | <=0.5 | 4   | 0.25   |
| VI | 2008-C07-242 | Blood | 75 | 4   | >16 | <=0.5 | 8   | <=0.5 | 4   | 0.25   |
| VI | 2008-C07-247 | Blood | 44 | <=2 | >16 | <=0.5 | 8   | <=0.5 | <=2 | 0.25   |
| VI | 2008-C07-248 | Blood | 76 | <=2 | >16 | <=0.5 | 8   | <=0.5 | 4   | 0.25   |
| VI | 2008-N16-001 | Urine | 23 | <=2 | 4   | <=0.5 | 4   | 1     | <=2 | <=0.03 |
| VI | 2008-N16-002 | Urine | 20 | <=2 | >16 | <=0.5 | 4   | <=0.5 | 4   | <=0.03 |
| VI | 2008-N16-003 | Blood | 40 | <=2 | 2   | <=0.5 | 4   | <=0.5 | <=2 | <=0.03 |
| VI | 2008-N16-006 | Urine | 23 | <=2 | >16 | <=0.5 | 8   | <=0.5 | 4   | 0.12   |
| VI | 2008-N16-020 | Urine | 1  | <=2 | >16 | >16   | 8   | 16    | >16 | >2     |
| VI | 2008-N16-023 | Urine | 3  | <=2 | >16 | <=0.5 | 16  | <=0.5 | >16 | <=0.03 |
| VI | 2008-N16-025 | Urine | 86 | <=2 | >16 | <=0.5 | 16  | <=0.5 | 16  | <=0.03 |
| VI | 2008-N16-028 | Urine | 86 | 16  | >16 | <=0.5 | >16 | 4     | >16 | >2     |
| VI | 2008-N16-033 | Urine | 83 | 8   | >16 | >16   | >16 | >16   | >16 | >2     |
| VI | 2008-N16-034 | Urine | 23 | <=2 | 4   | <=0.5 | 4   | <=0.5 | <=2 | <=0.03 |
| VI | 2008-N16-047 | Urine | 54 | <=2 | <=1 | <=0.5 | 2   | <=0.5 | <=2 | <=0.03 |
| VI | 2008-N16-048 | Urine | 67 | <=2 | 4   | <=0.5 | 4   | <=0.5 | <=2 | <=0.03 |
| VI | 2008-N16-049 | Urine | 92 | <=2 | >16 | <=0.5 | 16  | <=0.5 | 16  | >2     |
| VI | 2008-N16-050 | Urine | 74 | <=2 | 8   | <=0.5 | 4   | <=0.5 | 8   | >2     |

|    |              |       |    |     |     |       |     |       |     |        |
|----|--------------|-------|----|-----|-----|-------|-----|-------|-----|--------|
| VI | 2008-N16-211 | Blood | 87 | <=2 | >16 | <=0.5 | 16  | <=0.5 | 16  | >2     |
| VI | 2008-N16-218 | Blood | 82 | 4   | >16 | <=0.5 | 8   | <=0.5 | 4   | >2     |
| VI | 2008-N16-220 | Blood | 77 | <=2 | >16 | <=0.5 | 8   | <=0.5 | <=2 | <=0.03 |
| VI | 2008-N16-221 | Blood | 83 | <=2 | 4   | <=0.5 | 4   | <=0.5 | <=2 | <=0.03 |
| VI | 2008-N16-232 | Blood | 81 | 4   | 4   | <=0.5 | 8   | <=0.5 | 4   | 0.12   |
| VI | 2008-N16-249 | Blood | 80 | <=2 | >16 | <=0.5 | 4   | <=0.5 | <=2 | <=0.03 |
| VI | 2008-N17-001 | Urine | 47 | 4   | >16 | <=0.5 | 16  | <=0.5 | <=2 | 0.06   |
| VI | 2008-N17-003 | Urine | 78 | <=2 | >16 | <=0.5 | 16  | <=0.5 | 8   | <=0.03 |
| VI | 2008-N17-004 | Urine | 75 | 4   | 8   | <=0.5 | 8   | <=0.5 | <=2 | 0.12   |
| VI | 2008-N17-017 | Urine | 94 | 4   | >16 | 8     | >16 | 8     | >16 | <=0.03 |
| VI | 2008-N17-018 | Urine | 86 | 8   | >16 | >16   | 16  | 16    | >16 | >2     |
| VI | 2008-N17-022 | Urine | 24 | <=2 | 4   | <=0.5 | 4   | <=0.5 | <=2 | <=0.03 |
| VI | 2008-N17-023 | Urine | 28 | <=2 | >16 | <=0.5 | 8   | <=0.5 | 4   | <=0.03 |
| VI | 2008-N17-024 | Urine | 71 | 4   | >16 | <=0.5 | 16  | <=0.5 | 16  | <=0.03 |
| VI | 2008-N17-025 | Urine | 26 | <=2 | >16 | <=0.5 | 8   | <=0.5 | <=2 | <=0.03 |
| VI | 2008-N17-026 | Urine | 69 | <=2 | >16 | 16    | >16 | >16   | >16 | >2     |
| VI | 2008-N17-027 | Urine | 51 | <=2 | 4   | <=0.5 | 4   | <=0.5 | <=2 | <=0.03 |
| VI | 2008-N17-028 | Blood | 65 | 4   | >16 | <=0.5 | 8   | <=0.5 | <=2 | <=0.03 |
| VI | 2008-N17-031 | Urine | 40 | <=2 | >16 | <=0.5 | 16  | <=0.5 | 16  | <=0.03 |
| VI | 2008-N17-032 | Blood | 71 | <=2 | 2   | <=0.5 | 4   | <=0.5 | <=2 | <=0.03 |
| VI | 2008-N17-033 | Urine | 75 | <=2 | 4   | <=0.5 | 4   | <=0.5 | <=2 | <=0.03 |
| VI | 2008-N17-034 | Urine | 53 | <=2 | 2   | <=0.5 | 4   | <=0.5 | <=2 | <=0.03 |
| VI | 2008-N17-035 | Urine | 64 | <=2 | 2   | <=0.5 | 4   | <=0.5 | <=2 | 0.25   |
| VI | 2008-N17-036 | Urine | 52 | 4   | >16 | <=0.5 | 8   | <=0.5 | 4   | <=0.03 |
| VI | 2008-N17-038 | Blood | 84 | <=2 | 4   | <=0.5 | 4   | <=0.5 | <=2 | <=0.03 |
| VI | 2008-N17-039 | Blood | 73 | <=2 | 2   | <=0.5 | 4   | <=0.5 | <=2 | <=0.03 |
| VI | 2008-N17-042 | Urine | 44 | 4   | >16 | 8     | >16 | 16    | >16 | 0.25   |
| VI | 2008-N17-049 | Urine | 43 | 4   | 8   | <=0.5 | 8   | <=0.5 | 4   | >2     |
| VI | 2008-N17-050 | Blood | 93 | <=2 | >16 | 4     | 16  | 4     | >16 | >2     |
| VI | 2008-N17-165 | Blood | 72 | 8   | >16 | <=0.5 | 16  | <=0.5 | 8   | 0.25   |
| VI | 2008-N17-181 | Urine | 69 | 4   | >16 | <=0.5 | 8   | <=0.5 | <=2 | 0.06   |
| VI | 2008-N17-184 | Urine | 4  | <=2 | >16 | 16    | >16 | >16   | >16 | >2     |
| VI | 2008-N17-185 | Urine | 5  | <=2 | 2   | <=0.5 | 4   | <=0.5 | <=2 | <=0.03 |
| VI | 2008-N19-002 | Blood | 74 | <=2 | >16 | <=0.5 | 8   | <=0.5 | <=2 | 0.5    |
| VI | 2008-N19-003 | Urine | 27 | <=2 | >16 | <=0.5 | 16  | <=0.5 | 8   | <=0.03 |
| VI | 2008-N19-004 | Urine | 24 | <=2 | >16 | <=0.5 | 8   | <=0.5 | <=2 | <=0.03 |
| VI | 2008-N19-007 | Urine | 68 | <=2 | >16 | <=0.5 | 16  | <=0.5 | 8   | <=0.03 |
| VI | 2008-N19-011 | Urine | 92 | <=2 | >16 | 8     | >16 | 16    | >16 | >2     |
| VI | 2008-N19-012 | Urine | 36 | <=2 | >16 | <=0.5 | 16  | <=0.5 | 16  | <=0.03 |
| VI | 2008-N19-013 | Urine | 48 | 4   | >16 | <=0.5 | 16  | <=0.5 | 16  | 0.25   |
| VI | 2008-N19-015 | Urine | 69 | 4   | >16 | <=0.5 | 8   | <=0.5 | 8   | <=0.03 |
| VI | 2008-N19-019 | Urine | 70 | 4   | >16 | 16    | >16 | >16   | >16 | >2     |
| VI | 2008-N19-024 | Blood | 51 | <=2 | >16 | <=0.5 | 16  | <=0.5 | <=2 | <=0.03 |
| VI | 2008-N19-028 | Urine | 76 | 4   | >16 | 2     | >16 | 8     | >16 | >2     |
| VI | 2008-N19-029 | Urine | 87 | <=2 | 4   | <=0.5 | 4   | <=0.5 | <=2 | <=0.03 |
| VI | 2008-N19-030 | Urine | 82 | <=2 | 4   | <=0.5 | 4   | <=0.5 | <=2 | <=0.03 |
| VI | 2008-N19-031 | Urine | 94 | <=2 | >16 | <=0.5 | 16  | <=0.5 | 8   | <=0.03 |
| VI | 2008-N19-034 | Urine | 54 | <=2 | 2   | <=0.5 | 4   | <=0.5 | <=2 | 0.12   |
| VI | 2008-N19-041 | Urine | 20 | <=2 | >16 | <=0.5 | 8   | <=0.5 | <=2 | <=0.03 |
| VI | 2008-N19-042 | Blood | 77 | <=2 | 2   | <=0.5 | 2   | <=0.5 | <=2 | <=0.03 |
| VI | 2008-N19-043 | Urine | 31 | <=2 | <=1 | <=0.5 | 1   | <=0.5 | <=2 | <=0.03 |
| VI | 2008-N19-048 | Urine | 23 | <=2 | >16 | <=0.5 | 8   | <=0.5 | <=2 | <=0.03 |
| VI | 2008-N19-204 | Blood | 83 | <=2 | >16 | <=0.5 | 16  | <=0.5 | 16  | 0.5    |
| VI | 2008-N19-205 | Blood | 60 | 4   | 2   | <=0.5 | 4   | <=0.5 | <=2 | 0.12   |
| VI | 2008-N19-206 | Blood | 38 | <=2 | 4   | <=0.5 | 4   | <=0.5 | <=2 | <=0.03 |
| VI | 2008-N19-214 | Blood | 71 | <=2 | >16 | <=0.5 | 8   | <=0.5 | <=2 | >2     |
| VI | 2008-N19-217 | Blood | 77 | <=2 | >16 | <=0.5 | 8   | <=0.5 | <=2 | <=0.03 |
| VI | 2008-N19-223 | Blood | 86 | <=2 | >16 | <=0.5 | 16  | <=0.5 | 16  | <=0.03 |
| VI | 2008-N19-233 | Blood | 83 | <=2 | >16 | <=0.5 | 8   | <=0.5 | <=2 | <=0.03 |
| VI | 2008-C08-002 | Urine | 72 | <=2 | 2   | <=0.5 | 4   | <=0.5 | <=2 | <=0.03 |
| VI | 2008-C08-005 | Urine | 78 | 4   | 4   | <=0.5 | 4   | <=0.5 | <=2 | <=0.03 |

|    |              |       |       |     |     |       |     |       |     |        |
|----|--------------|-------|-------|-----|-----|-------|-----|-------|-----|--------|
| VI | 2008-C08-006 | Urine | 74    | <=2 | >16 | 2     | 16  | <=0.5 | >16 | >2     |
| VI | 2008-C08-010 | Urine | 0     | 4   | >16 | <=0.5 | 8   | <=0.5 | <=2 | <=0.03 |
| VI | 2008-C08-013 | Urine | 10    | 4   | 8   | <=0.5 | 4   | <=0.5 | <=2 | <=0.03 |
| VI | 2008-C08-014 | Urine | 21    | 4   | 4   | <=0.5 | 4   | <=0.5 | <=2 | <=0.03 |
| VI | 2008-C08-015 | Urine | 77    | <=2 | >16 | <=0.5 | 8   | <=0.5 | 8   | 0.12   |
| VI | 2008-C08-018 | Urine | 42    | <=2 | >16 | <=0.5 | 8   | <=0.5 | <=2 | <=0.03 |
| VI | 2008-C08-023 | Urine | 23    | 4   | >16 | <=0.5 | 16  | <=0.5 | 8   | <=0.03 |
| VI | 2008-C08-024 | Urine | 56    | 16  | >16 | <=0.5 | 8   | <=0.5 | 4   | 1      |
| VI | 2008-C08-025 | Urine | 33    | <=2 | >16 | <=0.5 | 16  | <=0.5 | 16  | <=0.03 |
| VI | 2008-C08-030 | Urine | 33    | <=2 | 2   | <=0.5 | 4   | <=0.5 | <=2 | <=0.03 |
| VI | 2008-C08-031 | Urine | 71    | <=2 | 4   | <=0.5 | 4   | <=0.5 | <=2 | >2     |
| VI | 2008-C08-042 | Urine | 44    | 4   | >16 | <=0.5 | 8   | <=0.5 | 4   | <=0.03 |
| VI | 2008-C08-047 | Urine | 74    | <=2 | >16 | <=0.5 | 8   | <=0.5 | 4   | 0.25   |
| VI | 2008-C08-049 | Urine | 0     | <=2 | >16 | <=0.5 | 8   | <=0.5 | 4   | <=0.03 |
| VI | 2008-C08-186 | Urine | 0     | 4   | >16 | <=0.5 | 8   | <=0.5 | 4   | <=0.03 |
| VI | 2008-C08-195 | Urine | 0     | <=2 | 4   | <=0.5 | 4   | <=0.5 | <=2 | <=0.03 |
| VI | 2008-C08-212 | Blood | 78    | <=2 | >16 | >16   | >16 | >16   | >16 | 0.25   |
| VI | 2008-C08-219 | Blood |       | 4   | >16 | <=0.5 | 8   | <=0.5 | <=2 | 0.25   |
| VI | 2008-C08-237 | Blood | 76    | <=2 | >16 | 16    | >16 | 16    | >16 | >2     |
| VI | 2008-S11-002 | Blood | 81    | <=2 | >16 | <=0.5 | 8   | <=0.5 | 4   | <=0.03 |
| VI | 2008-S11-005 | Blood | 59    | <=2 | >16 | <=0.5 | 8   | <=0.5 | <=2 | <=0.03 |
| VI | 2008-S11-006 | Urine | 48    | <=2 | 4   | <=0.5 | 4   | <=0.5 | <=2 | <=0.03 |
| VI | 2008-S11-015 | Urine | 66    | <=2 | 4   | <=0.5 | 4   | <=0.5 | <=2 | <=0.03 |
| VI | 2008-S11-022 | Urine | 88    | <=2 | >16 | <=0.5 | 8   | <=0.5 | 4   | >2     |
| VI | 2008-S11-026 | Urine | 13    | <=2 | >16 | <=0.5 | 16  | <=0.5 | <=2 | <=0.03 |
| VI | 2008-S11-035 | Urine | 0(6m) | <=2 | >16 | <=0.5 | 16  | <=0.5 | <=2 | <=0.03 |
| VI | 2008-S11-036 | Urine | 81    | <=2 | >16 | <=0.5 | 16  | <=0.5 | <=2 | <=0.03 |
| VI | 2008-S11-037 | Urine | 79    | <=2 | >16 | <=0.5 | 8   | <=0.5 | 16  | <=0.03 |
| VI | 2008-S11-041 | Urine | 45    | <=2 | 4   | <=0.5 | 4   | <=0.5 | <=2 | 0.25   |
| VI | 2008-S11-042 | Urine | 54    | <=2 | >16 | <=0.5 | 8   | <=0.5 | 4   | 0.25   |
| VI | 2008-S11-043 | Urine | 58    | <=2 | >16 | <=0.5 | 16  | <=0.5 | 4   | <=0.03 |
| VI | 2008-S11-045 | Urine | 76    | <=2 | 2   | <=0.5 | 4   | <=0.5 | <=2 | <=0.03 |
| VI | 2008-S11-046 | Urine | 74    | 4   | >16 | <=0.5 | 8   | <=0.5 | 4   | <=0.03 |
| VI | 2008-S11-050 | Urine | 69    | <=2 | >16 | 8     | >16 | 16    | >16 | 0.25   |
| VI | 2008-S11-191 | Urine | 9     | 4   | 2   | <=0.5 | 2   | <=0.5 | <=2 | <=0.03 |
| VI | 2008-N21-005 | Urine | 27    | 4   | >16 | <=0.5 | 8   | <=0.5 | 4   | 0.25   |
| VI | 2008-N21-010 | Urine | 56    | <=2 | >16 | <=0.5 | 8   | <=0.5 | 4   | 0.25   |
| VI | 2008-N21-011 | Urine | 49    | 4   | >16 | <=0.5 | 8   | <=0.5 | 4   | >2     |
| VI | 2008-N21-021 | Urine | 89    | <=2 | >16 | 16    | >16 | 16    | >16 | 0.25   |
| VI | 2008-N21-023 | Urine | 27    | <=2 | >16 | <=0.5 | 16  | <=0.5 | 8   | 0.5    |
| VI | 2008-N21-025 | Urine | 22    | <=2 | >16 | <=0.5 | 8   | <=0.5 | <=2 | <=0.03 |
| VI | 2008-N21-026 | Urine | 22    | 4   | >16 | <=0.5 | 8   | <=0.5 | 4   | 0.12   |
| VI | 2008-N21-027 | Urine | 40    | 8   | >16 | <=0.5 | 8   | <=0.5 | 4   | <=0.03 |
| VI | 2008-N21-028 | Urine | 62    | <=2 | >16 | <=0.5 | 16  | <=0.5 | 16  | <=0.03 |
| VI | 2008-N21-029 | Urine | 67    | <=2 | >16 | <=0.5 | 8   | <=0.5 | 8   | <=0.03 |
| VI | 2008-N21-032 | Urine | 82    | 4   | >16 | <=0.5 | 16  | <=0.5 | 16  | <=0.03 |
| VI | 2008-N21-033 | Urine | 36    | 4   | >16 | <=0.5 | 8   | <=0.5 | 4   | <=0.03 |
| VI | 2008-N21-040 | Blood | 73    | 4   | >16 | <=0.5 | 8   | <=0.5 | 4   | 0.25   |
| VI | 2008-N21-049 | Urine | 98    | <=2 | >16 | <=0.5 | 8   | <=0.5 | 4   | >2     |
| VI | 2008-N21-181 | Urine | 1     | 4   | 4   | <=0.5 | 4   | <=0.5 | 4   | <=0.03 |
| VI | 2008-N21-185 | Urine | 2     | 4   | 4   | <=0.5 | 4   | <=0.5 | <=2 | 1      |
| VI | 2008-N21-189 | Urine | 0     | 8   | >16 | <=0.5 | 16  | <=0.5 | >16 | <=0.03 |
| VI | 2008-N21-193 | Urine | 10    | 4   | >16 | <=0.5 | 8   | <=0.5 | 4   | 0.06   |
| VI | 2008-N21-196 | Urine | 1     | 4   | 4   | <=0.5 | 4   | <=0.5 | <=2 | <=0.03 |
| VI | 2008-N21-197 | Urine | 0     | 8   | >16 | <=0.5 | 4   | <=0.5 | 4   | 1      |
| VI | 2008-N21-208 | Blood | 60    | <=2 | 4   | <=0.5 | 4   | <=0.5 | <=2 | <=0.03 |
| VI | 2008-N21-216 | Blood | 64    | 4   | >16 | <=0.5 | 8   | <=0.5 | 4   | >2     |
| VI | 2008-N21-217 | Blood | 63    | 4   | >16 | <=0.5 | 8   | <=0.5 | 4   | <=0.03 |
| VI | 2008-N21-219 | Blood | 51    | 4   | >16 | <=0.5 | 16  | <=0.5 | 16  | >2     |
| VI | 2008-N21-227 | Blood | 33    | 4   | 4   | <=0.5 | 4   | <=0.5 | <=2 | <=0.03 |
| VI | 2008-N21-230 | Blood | 60    | <=2 | >16 | >16   | >16 | >16   | >16 | >2     |



|    |              |       |    |     |     |       |     |       |     |        |
|----|--------------|-------|----|-----|-----|-------|-----|-------|-----|--------|
| VI | 2008-N21-233 | Blood | 65 | <=2 | >16 | <=0.5 | 8   | <=0.5 | 4   | <=0.03 |
| VI | 2008-N21-234 | Blood | 71 | 4   | >16 | <=0.5 | 8   | <=0.5 | <=2 | <=0.03 |
| VI | 2008-N21-237 | Blood | 70 | 4   | >16 | <=0.5 | 4   | <=0.5 | <=2 | 1      |
| VI | 2008-N21-245 | Blood | 66 | <=2 | 4   | <=0.5 | 4   | <=0.5 | <=2 | <=0.03 |
| VI | 2008-N21-249 | Blood | 74 | 4   | 4   | <=0.5 | 4   | <=0.5 | <=2 | <=0.03 |
| VI | 2008-N21-250 | Blood | 60 | <=2 | >16 | 2     | >16 | >16   | >16 | 0.5    |
| VI | 2008-C09-001 | Urine | 10 | <=2 | >16 | <=0.5 | 16  | <=0.5 | 8   | <=0.03 |
| VI | 2008-C09-002 | Urine | 56 | <=2 | >16 | <=0.5 | 8   | <=0.5 | <=2 | 0.25   |
| VI | 2008-C09-003 | Urine | 69 | >32 | >16 | >16   | >16 | 8     | >16 | >2     |
| VI | 2008-C09-008 | Urine | 73 | 8   | >16 | 16    | >16 | >16   | >16 | >2     |
| VI | 2008-C09-011 | Urine | 77 | <=2 | >16 | <=0.5 | 8   | <=0.5 | <=2 | <=0.03 |
| VI | 2008-C09-020 | Urine | 23 | 4   | >16 | <=0.5 | >16 | <=0.5 | 16  | <=0.03 |
| VI | 2008-C09-024 | Urine | 55 | <=2 | >16 | <=0.5 | 8   | <=0.5 | <=2 | <=0.03 |
| VI | 2008-C09-032 | Urine | 81 | 4   | >16 | 8     | >16 | 16    | >16 | >2     |
| VI | 2008-C09-035 | Urine | 79 | >32 | >16 | 16    | >16 | >16   | >16 | >2     |
| VI | 2008-C09-036 | Urine | 87 | <=2 | >16 | >16   | >16 | >16   | >16 | >2     |
| VI | 2008-C09-042 | Urine | 79 | 4   | 4   | <=0.5 | 4   | <=0.5 | <=2 | <=0.03 |
| VI | 2008-C09-047 | Urine | 45 | <=2 | >16 | <=0.5 | 8   | <=0.5 | <=2 | <=0.03 |
| VI | 2008-C09-049 | Urine | 77 | 8   | >16 | 2     | 16  | 1     | >16 | >2     |
| VI | 2008-C09-207 | Blood | 74 | <=2 | >16 | <=0.5 | 8   | <=0.5 | 4   | 0.25   |
| VI | 2008-C09-212 | Blood | 42 | 4   | 4   | <=0.5 | 2   | <=0.5 | <=2 | <=0.03 |
| VI | 2008-C09-214 | Blood | 34 | <=2 | >16 | <=0.5 | 16  | <=0.5 | 16  | <=0.03 |
| VI | 2008-C09-222 | Blood | 32 | 4   | >16 | <=0.5 | 16  | <=0.5 | 8   | 0.25   |
| VI | 2008-C09-227 | Blood | 42 | 8   | >16 | 8     | >16 | 16    | >16 | >2     |
| VI | 2008-C09-230 | Blood | 54 | >32 | >16 | 2     | >16 | 4     | >16 | <=0.03 |
| VI | 2008-C09-233 | Blood | 75 | <=2 | >16 | <=0.5 | 16  | <=0.5 | 4   | 0.5    |
| VI | 2008-C09-238 | Blood | 50 | <=2 | >16 | <=0.5 | 8   | <=0.5 | 4   | 0.12   |
| VI | 2008-C09-242 | Blood | 94 | 4   | 2   | <=0.5 | 4   | <=0.5 | <=2 | <=0.03 |
| VI | 2008-C09-244 | Blood | 65 | 8   | >16 | <=0.5 | 16  | <=0.5 | 8   | 0.5    |
| VI | 2008-C09-250 | Blood | 60 | <=2 | >16 | <=0.5 | 8   | <=0.5 | <=2 | <=0.03 |
| VI | 2008-C10-001 | Blood | 77 | <=2 | >16 | <=0.5 | 8   | <=0.5 | <=2 | 0.25   |
| VI | 2008-C10-002 | Urine | 60 | <=2 | >16 | <=0.5 | >16 | <=0.5 | 16  | <=0.03 |
| VI | 2008-C10-003 | Urine | 84 | <=2 | 2   | <=0.5 | 4   | <=0.5 | <=2 | 0.25   |
| VI | 2008-C10-004 | Urine | 56 | >32 | >16 | >16   | >16 | >16   | >16 | >2     |
| VI | 2008-C10-015 | Urine | 40 | 4   | >16 | <=0.5 | 16  | <=0.5 | 16  | <=0.03 |
| VI | 2008-C10-016 | Urine | 34 | <=2 | 2   | <=0.5 | 4   | <=0.5 | <=2 | <=0.03 |
| VI | 2008-C10-018 | Urine | 48 | <=2 | >16 | <=0.5 | 16  | <=0.5 | 4   | <=0.03 |
| VI | 2008-C10-026 | Blood | 72 | 4   | 8   | <=0.5 | 8   | <=0.5 | <=2 | <=0.03 |
| VI | 2008-C10-027 | Blood | 24 | <=2 | >16 | <=0.5 | 16  | <=0.5 | 8   | 0.25   |
| VI | 2008-C10-028 | Blood | 42 | <=2 | >16 | <=0.5 | 8   | <=0.5 | <=2 | <=0.03 |
| VI | 2008-C10-029 | Urine | 56 | <=2 | >16 | <=0.5 | 8   | <=0.5 | 4   | 0.25   |
| VI | 2008-C10-041 | Urine | 24 | <=2 | 4   | <=0.5 | 4   | <=0.5 | <=2 | <=0.03 |
| VI | 2008-C10-042 | Blood | 71 | 4   | 4   | <=0.5 | 4   | <=0.5 | <=2 | <=0.03 |
| VI | 2008-C10-043 | Urine | 73 | <=2 | >16 | <=0.5 | 8   | <=0.5 | 4   | >2     |
| VI | 2008-C10-047 | Urine | 59 | 4   | 2   | <=0.5 | 4   | <=0.5 | <=2 | <=0.03 |
| VI | 2008-C10-048 | Urine | 78 | <=2 | 4   | <=0.5 | 4   | <=0.5 | <=2 | <=0.03 |
| VI | 2008-C10-204 | Blood | 66 | <=2 | >16 | <=0.5 | 16  | <=0.5 | 8   | <=0.03 |
| VI | 2008-C10-213 | Blood | 50 | <=2 | 4   | <=0.5 | 4   | <=0.5 | <=2 | <=0.03 |
| VI | 2008-C10-215 | Blood | 21 | 4   | 4   | <=0.5 | 4   | <=0.5 | <=2 | <=0.03 |
| VI | 2008-C10-222 | Blood | 72 | <=2 | >16 | <=0.5 | 16  | <=0.5 | 4   | 1      |
| VI | 2008-C10-224 | Blood | 80 | 4   | 4   | <=0.5 | 8   | <=0.5 | <=2 | <=0.03 |
| VI | 2008-C10-225 | Blood | 46 | <=2 | >16 | <=0.5 | 16  | <=0.5 | <=2 | <=0.03 |
| VI | 2008-C10-227 | Blood | 58 | 4   | 4   | <=0.5 | 4   | <=0.5 | 4   | <=0.03 |
| VI | 2008-C10-234 | Blood | 73 | <=2 | >16 | 8     | >16 | >16   | >16 | >2     |
| VI | 2008-C10-239 | Blood | 69 | 4   | 4   | <=0.5 | 8   | <=0.5 | <=2 | 0.5    |
| VI | 2008-C10-247 | Blood | 63 | 8   | >16 | <=0.5 | >16 | <=0.5 | 16  | <=0.03 |
| VI | 2008-C10-248 | Blood | 83 | 4   | 4   | <=0.5 | 4   | <=0.5 | <=2 | <=0.03 |
| VI | 2008-C10-249 | Blood | 87 | 4   | >16 | <=0.5 | 16  | <=0.5 | 16  | <=0.03 |
| VI | 2008-E04-002 | Blood | 75 | <=2 | <=1 | <=0.5 | 1   | <=0.5 | <=2 | <=0.03 |
| VI | 2008-E04-003 | Blood | 68 | 4   | 4   | <=0.5 | 4   | <=0.5 | <=2 | <=0.03 |
| VI | 2008-E04-008 | Blood | 56 | 4   | >16 | 4     | 8   | 1     | >16 | 0.25   |

|     |              |       |    |     |     |       |     |       |     |        |
|-----|--------------|-------|----|-----|-----|-------|-----|-------|-----|--------|
| VI  | 2008-E04-010 | Blood | 51 | <=2 | >16 | <=0.5 | 8   | <=0.5 | 4   | <=0.03 |
| VI  | 2008-E04-012 | Blood | 75 | <=2 | >16 | 8     | >16 | 16    | >16 | >2     |
| VI  | 2008-E04-014 | Blood | 74 | 4   | >16 | <=0.5 | 8   | <=0.5 | 4   | <=0.03 |
| VI  | 2008-E04-015 | Blood | 54 | 4   | 4   | <=0.5 | 4   | <=0.5 | <=2 | <=0.03 |
| VI  | 2008-E04-017 | Blood | 62 | 4   | 2   | <=0.5 | 1   | <=0.5 | <=2 | <=0.03 |
| VI  | 2008-E04-019 | Blood | 79 | 4   | >16 | 16    | >16 | 16    | >16 | <=0.03 |
| VI  | 2008-E04-020 | Blood | 66 | 4   | >16 | <=0.5 | 16  | <=0.5 | 8   | <=0.03 |
| VI  | 2008-E04-026 | Blood | 48 | 4   | >16 | <=0.5 | 4   | <=0.5 | <=2 | <=0.03 |
| VI  | 2008-E04-027 | Blood | 45 | >32 | >16 | >16   | 16  | 8     | >16 | >2     |
| VI  | 2008-E04-029 | Blood | 67 | <=2 | >16 | <=0.5 | 8   | <=0.5 | <=2 | <=0.03 |
| VI  | 2008-E04-031 | Blood | 73 | <=2 | 4   | <=0.5 | 4   | <=0.5 | <=2 | 0.25   |
| VI  | 2008-E04-033 | Blood | 63 | 4   | 4   | <=0.5 | 4   | <=0.5 | <=2 | <=0.03 |
| VI  | 2008-E04-036 | Blood | 53 | 8   | 8   | <=0.5 | 8   | <=0.5 | 4   | <=0.03 |
| VI  | 2008-E04-039 | Blood | 70 | <=2 | >16 | <=0.5 | 8   | <=0.5 | 4   | <=0.03 |
| VI  | 2008-E04-040 | Blood | 88 | <=2 | >16 | <=0.5 | 8   | <=0.5 | <=2 | 0.06   |
| VI  | 2008-E04-043 | Blood | 87 | <=2 | >16 | <=0.5 | 8   | <=0.5 | <=2 | <=0.03 |
| VI  | 2008-E04-050 | Blood | 80 | <=2 | >16 | <=0.5 | 16  | <=0.5 | 16  | <=0.03 |
| VII | 2010-S01-004 | Other | 45 | <=4 | 4   | <=1   |     | <=1   | <=2 | <=0.06 |
| VII | 2010-S01-009 | Urine | 80 | <=4 | >16 | <=1   |     | <=1   | 4   | 0.25   |
| VII | 2010-S01-011 | Urine | 81 | <=4 | >16 | >16   |     | 4     | >16 | >2     |
| VII | 2010-S01-016 | Urine | 0  | <=4 | 4   | <=1   |     | <=1   | <=2 | <=0.06 |
| VII | 2010-S01-017 | Urine | 60 | <=4 | <=2 | <=1   |     | <=1   | <=2 | <=0.06 |
| VII | 2010-S01-018 | Urine | 85 | 8   | >16 | <=1   |     | <=1   | 8   | 0.25   |
| VII | 2010-S01-020 | Urine | 83 | <=4 | 8   | <=1   |     | <=1   | <=2 | <=0.06 |
| VII | 2010-S01-021 | Urine | 59 | <=4 | >16 | 16    |     | >16   | >16 | >2     |
| VII | 2010-S01-022 | Urine | 84 | <=4 | >16 | <=1   |     | <=1   | 4   | <=0.06 |
| VII | 2010-S01-027 | Other | 68 | <=4 | >16 | <=1   |     | <=1   | <=2 | <=0.06 |
| VII | 2010-S01-028 | Urine | 81 | <=4 | >16 | 4     |     | <=1   | >16 | 0.5    |
| VII | 2010-S01-030 | Urine | 49 | <=4 | >16 | <=1   |     | 8     | >16 | 0.5    |
| VII | 2010-S01-033 | Urine | 72 | <=4 | >16 | 16    |     | >16   | >16 | 0.5    |
| VII | 2010-S01-039 | Urine | 61 | <=4 | >16 | <=1   |     | <=1   | 4   | >2     |
| VII | 2010-S01-041 | Urine | 59 | <=4 | 4   | <=1   |     | <=1   | 4   | 0.12   |
| VII | 2010-S01-046 | Urine | 48 | <=4 | 4   | <=1   |     | <=1   | <=2 | <=0.06 |
| VII | 2010-S01-047 | Urine | 30 | <=4 | >16 | <=1   |     | <=1   | 8   | 0.25   |
| VII | 2010-S01-204 | Blood | 57 | <=4 | >16 | <=2   |     | <=1   | 4   | <=0.06 |
| VII | 2010-S01-216 | Blood | 88 | <=4 | >16 | <=2   |     | <=1   | 4   | <=0.06 |
| VII | 2010-S01-218 | Blood | 68 | <=4 | >16 | <=2   |     | <=1   | 8   | 0.25   |
| VII | 2010-S01-227 | Blood | 65 | <=4 | >16 | <=2   |     | <=1   | 8   | <=0.06 |
| VII | 2010-S01-230 | Blood | 75 | <=4 | >16 | <=2   |     | <=1   | 4   | <=0.06 |
| VII | 2010-S01-233 | Blood | 83 | <=4 | >16 | <=2   |     | <=1   | 4   | <=0.06 |
| VII | 2010-S01-234 | Other | 55 | <=4 | >16 | 4     |     | 8     | >16 | >2     |
| VII | 2010-S01-240 | Blood | 70 | 8   | 4   | <=2   |     | <=1   | 4   | <=0.06 |
| VII | 2010-S01-241 | Blood | 95 | <=4 | 8   | <=2   |     | <=1   | 2   | <=0.06 |
| VII | 2010-S01-243 | Blood | 55 | <=4 | 4   | <=2   |     | <=1   | 2   | <=0.06 |
| VII | 2010-S01-245 | Blood | 28 | <=4 | <=2 | <=2   |     | <=1   | 2   | >2     |
| VII | 2010-S01-246 | Blood | 62 | 8   | >16 | >16   |     | 16    | >16 | >2     |
| VII | 2010-S01-247 | Blood | 52 | <=4 | >16 | <=2   |     | <=1   | 4   | <=0.06 |
| VII | 2010-C01-003 | Urine | 72 | <=4 | 4   | <=1   |     | <=1   | <=2 | <=0.06 |
| VII | 2010-C01-005 | Urine | 19 | <=4 | 4   | <=1   |     | <=1   | <=2 | <=0.06 |
| VII | 2010-C01-007 | Other | 51 | <=4 | >16 | <=1   |     | <=1   | 4   | <=0.06 |
| VII | 2010-C01-012 | Other | 51 | <=4 | >16 | <=1   |     | <=1   | 4   | 0.25   |
| VII | 2010-C01-015 | Other | 44 | <=4 | >16 | <=1   |     | <=1   | 8   | 0.25   |
| VII | 2010-C01-017 | Blood | 75 | <=4 | >16 | 16    |     | 2     | >16 | >2     |
| VII | 2010-C01-018 | Blood | 43 | <=4 | >16 | <=2   |     | <=1   | 8   | >2     |
| VII | 2010-C01-020 | Blood | 59 | <=4 | >16 | <=2   |     | <=1   | 8   | 0.25   |
| VII | 2010-C01-028 | Blood | 82 | <=4 | >16 | <=2   |     | <=1   | 8   | <=0.06 |
| VII | 2010-C01-029 | Urine | 15 | <=4 | >16 | <=1   |     | <=1   | <=2 | <=0.06 |
| VII | 2010-C01-030 | Urine | 78 | <=4 | <=2 | <=1   |     | <=1   | <=2 | 0.12   |
| VII | 2010-C01-031 | Urine | 4  | <=4 | >16 | <=1   |     | <=1   | 16  | <=0.06 |
| VII | 2010-C01-033 | Urine | 9  | <=4 | >16 | <=1   |     | <=1   | <=2 | <=0.06 |
| VII | 2010-C01-035 | Urine | 0  | <=4 | >16 | <=1   |     | <=1   | 4   | <=0.06 |

|     |              |       |    |     |     |     |     |     |        |
|-----|--------------|-------|----|-----|-----|-----|-----|-----|--------|
| VII | 2010-C01-037 | Urine | 75 | <=4 | >16 | 4   | 16  | >16 | >2     |
| VII | 2010-C01-041 | Urine | 33 | <=4 | <=2 | <=1 | <=1 | 4   | <=0.06 |
| VII | 2010-C01-046 | Urine | 20 | <=4 | >16 | <=1 | <=1 | 4   | 0.12   |
| VII | 2010-C01-047 | Urine | 79 | <=4 | >16 | 2   | <=1 | >16 | >2     |
| VII | 2010-C01-049 | Urine | 46 | <=4 | >16 | <=1 | <=1 | 4   | <=0.06 |
| VII | 2010-C01-050 | Urine | 71 | <=4 | >16 | <=1 | <=1 | 4   | 0.25   |
| VII | 2010-C01-183 | Urine | 1  | <=4 | >16 | <=1 | <=1 | 4   | <=0.06 |
| VII | 2010-C02-001 | Blood | 57 | <=4 | >16 | >16 | >16 | >16 | >2     |
| VII | 2010-C02-002 | Blood | 69 | <=4 | <=2 | <=2 | <=1 | <=1 | <=0.06 |
| VII | 2010-C02-003 | Blood | 50 | <=4 | <=2 | <=2 | <=1 | <=1 | <=0.06 |
| VII | 2010-C02-004 | Blood | 58 | <=4 | >16 | <=2 | <=1 | 2   | <=0.06 |
| VII | 2010-C02-006 | Blood | 52 | <=4 | >16 | <=2 | <=1 | 4   | <=0.06 |
| VII | 2010-C02-007 | Blood | 54 | <=4 | >16 | <=2 | <=1 | 2   | <=0.06 |
| VII | 2010-C02-008 | Urine | 55 | <=4 | >16 | 8   | 16  | >16 | >2     |
| VII | 2010-C02-009 | Urine | 64 | <=4 | >16 | <=1 | <=1 | 4   | <=0.06 |
| VII | 2010-C02-013 | Urine | 93 | <=4 | >16 | <=1 | <=1 | 4   | <=0.06 |
| VII | 2010-C02-015 | Urine | 69 | <=4 | >16 | 4   | 16  | >16 | 0.5    |
| VII | 2010-C02-017 | Urine | 19 | <=4 | <=2 | <=1 | <=1 | <=2 | <=0.06 |
| VII | 2010-C02-020 | Urine | 49 | <=4 | >16 | 4   | <=1 | >16 | 0.25   |
| VII | 2010-C02-024 | Urine | 49 | <=4 | <=2 | <=1 | <=1 | <=2 | <=0.06 |
| VII | 2010-C02-025 | Urine | 50 | <=4 | >16 | <=1 | <=1 | <=2 | <=0.06 |
| VII | 2010-C02-027 | Urine | 42 | <=4 | >16 | 8   | 16  | >16 | <=0.06 |
| VII | 2010-C02-029 | Urine | 43 | <=4 | >16 | 4   | 16  | >16 | <=0.06 |
| VII | 2010-C02-030 | Urine | 82 | <=4 | >16 | <=1 | <=1 | <=2 | <=0.06 |
| VII | 2010-C02-031 | Urine | 74 | <=4 | <=2 | <=1 | <=1 | <=2 | <=0.06 |
| VII | 2010-C02-032 | Urine | 52 | <=4 | >16 | <=1 | <=1 | 4   | 0.5    |
| VII | 2010-C02-033 | Other | 70 | <=4 | >16 | <=1 | <=1 | <=2 | <=0.06 |
| VII | 2010-C02-035 | Urine | 73 | 8   | >16 | >16 | >16 | >16 | >2     |
| VII | 2010-C02-040 | Blood | 31 | <=4 | >16 | <=2 | <=1 | 2   | 1      |
| VII | 2010-C02-041 | Blood | 75 | <=4 | >16 | <=2 | <=1 | 8   | >2     |
| VII | 2010-C02-047 | Blood | 26 | <=4 | <=2 | <=2 | <=1 | 2   | <=0.06 |
| VII | 2010-C02-048 | Blood | 78 | <=4 | >16 | <=2 | <=1 | 8   | 0.25   |
| VII | 2010-C02-049 | Urine | 47 | <=4 | >16 | <=1 | <=1 | 4   | 0.25   |
| VII | 2010-C02-050 | Urine | 81 | <=4 | >16 | <=1 | <=1 | 8   | <=0.06 |
| VII | 2010-C02-207 | Blood | 73 | 8   | >16 | <=2 | 2   | 2   | <=0.06 |
| VII | 2010-C02-212 | Blood | 73 | <=4 | 4   | <=2 | <=1 | <=1 | <=0.06 |
| VII | 2010-C02-219 | Blood | 44 | <=4 | <=2 | <=2 | <=1 | 2   | <=0.06 |
| VII | 2010-C02-224 | Blood | 64 | <=4 | >16 | <=2 | <=1 | 8   | >2     |
| VII | 2010-C02-225 | Blood | 71 | <=4 | 4   | <=2 | <=1 | 2   | <=0.06 |
| VII | 2010-C02-226 | Blood | 80 | <=4 | <=2 | <=2 | <=1 | 2   | <=0.06 |
| VII | 2010-C02-227 | Other | 58 | <=4 | <=2 | <=1 | <=1 | <=2 | <=0.06 |
| VII | 2010-C02-231 | Blood | 58 | 8   | >16 | <=2 | <=1 | 4   | <=0.06 |
| VII | 2010-C02-232 | Blood | 73 | <=4 | 4   | <=2 | <=1 | 2   | 0.25   |
| VII | 2010-C02-233 | Blood | 38 | <=4 | >16 | <=2 | <=1 | 2   | <=0.06 |
| VII | 2010-C02-244 | Blood | 77 | <=4 | >16 | <=2 | <=1 | 8   | <=0.06 |
| VII | 2010-C04-001 | Blood | 64 | <=4 | >16 | <=2 | <=1 | 2   | <=0.06 |
| VII | 2010-C04-003 | Urine | 22 | <=4 | 4   | <=1 | <=1 | <=2 | <=0.06 |
| VII | 2010-C04-009 | Urine | 73 | <=4 | >16 | 16  | 4   | >16 | >2     |
| VII | 2010-C04-010 | Urine | 0  | <=4 | <=2 | <=1 | <=1 | <=2 | <=0.06 |
| VII | 2010-C04-013 | Urine | 54 | <=4 | >16 | <=1 | <=1 | 16  | <=0.06 |
| VII | 2010-C04-016 | Urine | 72 | <=4 | >16 | <=1 | <=1 | 4   | 0.25   |
| VII | 2010-C04-021 | Urine | 71 | <=4 | >16 | <=1 | <=1 | 16  | 0.25   |
| VII | 2010-C04-023 | Urine | 67 | <=4 | >16 | <=1 | <=1 | 4   | 1      |
| VII | 2010-C04-026 | Blood | 83 | <=4 | >16 | <=2 | <=1 | 2   | 0.12   |
| VII | 2010-C04-031 | Other | 46 | <=4 | 4   | <=1 | <=1 | <=2 | <=0.06 |
| VII | 2010-C04-035 | Urine | 67 | <=4 | <=2 | <=1 | <=1 | <=2 | <=0.06 |
| VII | 2010-C04-039 | Urine | 88 | <=4 | >16 | <=1 | <=1 | >16 | <=0.06 |
| VII | 2010-C04-042 | Blood | 75 | <=4 | >16 | 4   | <=1 | >16 | 0.12   |
| VII | 2010-C04-044 | Blood | 88 | <=4 | <=2 | <=2 | <=1 | 2   | <=0.06 |
| VII | 2010-C04-230 | Blood | 26 | <=4 | <=2 | <=2 | <=1 | 2   | <=0.06 |
| VII | 2010-C04-246 | Blood | 80 | <=4 | >16 | <=2 | <=1 | >16 | 0.25   |

|     |              |       |     |     |     |     |     |     |        |
|-----|--------------|-------|-----|-----|-----|-----|-----|-----|--------|
| VII | 2010-S05-001 | Urine | 78  | <=4 | 4   | <=1 | <=1 | <=2 | <=0.06 |
| VII | 2010-S05-005 | Urine | 69  | <=4 | >16 | <=1 | <=1 | <=2 | 0.25   |
| VII | 2010-S05-009 | Urine | 87  | <=4 | >16 | >16 | >16 | >16 | >2     |
| VII | 2010-S05-017 | Urine | 78  | <=4 | >16 | >16 | >16 | >16 | >2     |
| VII | 2010-S05-018 | Urine | 68  | <=4 | 4   | <=1 | <=1 | 4   | <=0.06 |
| VII | 2010-S05-019 | Urine | 90  | <=4 | >16 | <=1 | <=1 | <=2 | >2     |
| VII | 2010-S05-020 | Urine | 83  | <=4 | >16 | <=1 | <=1 | 4   | >2     |
| VII | 2010-S05-023 | Blood | 35  | <=4 | >16 | <=2 | <=1 | 16  | <=0.06 |
| VII | 2010-S05-027 | Blood | 89  | <=4 | >16 | 16  | 16  | >16 | >2     |
| VII | 2010-S05-028 | Urine | 98  | <=4 | >16 | <=1 | <=1 | 4   | <=0.06 |
| VII | 2010-S05-029 | Urine | 58  | <=4 | <=2 | <=1 | <=1 | <=2 | <=0.06 |
| VII | 2010-S05-032 | Urine | 3   | <=4 | >16 | <=1 | <=1 | >16 | <=0.06 |
| VII | 2010-S05-036 | Urine |     | <=4 | >16 | <=1 | <=1 | 4   | <=0.06 |
| VII | 2010-S05-037 | Urine | 53  | <=4 | 4   | <=1 | <=1 | <=2 | <=0.06 |
| VII | 2010-S05-038 | Blood | 91  | 8   | >16 | >16 | >16 | >16 | >2     |
| VII | 2010-S05-040 | Urine | 90  | <=4 | >16 | 16  | 16  | >16 | >2     |
| VII | 2010-S05-041 | Urine | 58  | <=4 | >16 | <=1 | <=1 | <=2 | 0.5    |
| VII | 2010-S05-043 | Urine | 71  | <=4 | 4   | <=1 | <=1 | <=2 | <=0.06 |
| VII | 2010-S05-045 | Blood | 64  | 8   | >16 | >16 | >16 | >16 | >2     |
| VII | 2010-S05-047 | Urine | 76  | <=4 | >16 | 16  | 8   | >16 | >2     |
| VII | 2010-S05-181 | Urine |     | <=4 | >16 | <=1 | <=1 | 4   | <=0.06 |
| VII | 2010-S05-185 | Other | unk | <=4 | <=2 | <=1 | <=1 | <=2 | <=0.06 |
| VII | 2010-S05-188 | Urine | 3   | <=4 | >16 | <=1 | <=1 | 8   | <=0.06 |
| VII | 2010-S05-192 | Urine | 9   | <=4 | >16 | <=1 | <=1 | 8   | 0.25   |
| VII | 2010-S05-216 | Blood | 73  | <=4 | >16 | <=2 | <=1 | >16 | <=0.06 |
| VII | 2010-S05-218 | Blood | 73  | 16  | >16 | >16 | >16 | >16 | >2     |
| VII | 2010-S05-247 | Blood | 69  | <=4 | >16 | <=2 | <=1 | 4   | 1      |
| VII | 2010-S06-003 | Urine | 53  | <=4 | >16 | >16 | >16 | >16 | >2     |
| VII | 2010-S06-009 | Urine | 59  | <=4 | >16 | <=1 | <=1 | 4   | <=0.06 |
| VII | 2010-S06-011 | Urine | 39  | <=4 | >16 | 8   | >16 | >16 | 1      |
| VII | 2010-S06-012 | Urine | 66  | <=4 | >16 | <=1 | <=1 | 4   | <=0.06 |
| VII | 2010-S06-013 | Urine | 75  | <=4 | >16 | <=1 | <=1 | <=2 | <=0.06 |
| VII | 2010-S06-016 | Urine | 77  | <=4 | >16 | <=1 | <=1 | 8   | <=0.06 |
| VII | 2010-S06-017 | Urine | 75  | <=4 | <=2 | <=1 | <=1 | <=2 | 0.12   |
| VII | 2010-S06-021 | Urine | 80  | <=4 | >16 | 4   | 2   | >16 | >2     |
| VII | 2010-S06-023 | Urine | 25  | <=4 | >16 | 8   | 16  | >16 | >2     |
| VII | 2010-S06-026 | Urine | 59  | <=4 | >16 | <=1 | <=1 | <=2 | >2     |
| VII | 2010-S06-032 | Urine | 19  | <=4 | <=2 | <=1 | 2   | <=2 | <=0.06 |
| VII | 2010-S06-033 | Urine | 68  | <=4 | >16 | <=1 | <=1 | 4   | >2     |
| VII | 2010-S06-034 | Urine | 73  | <=4 | <=2 | <=1 | <=1 | <=2 | <=0.06 |
| VII | 2010-S06-037 | Urine | 53  | <=4 | <=2 | <=1 | <=1 | <=2 | <=0.06 |
| VII | 2010-S06-039 | Urine | 81  | <=4 | >16 | 16  | >16 | >16 | >2     |
| VII | 2010-S06-040 | Urine | 76  | <=4 | >16 | <=1 | <=1 | 16  | <=0.06 |
| VII | 2010-S06-041 | Urine | 45  | <=4 | 4   | <=1 | <=1 | <=2 | <=0.06 |
| VII | 2010-S06-043 | Urine | 53  | <=4 | >16 | <=1 | <=1 | 4   | <=0.06 |
| VII | 2010-S06-045 | Urine | 51  | <=4 | <=2 | <=1 | <=1 | <=2 | <=0.06 |
| VII | 2010-S06-048 | Urine | 79  | <=4 | >16 | 4   | 16  | >16 | >2     |
| VII | 2010-S06-049 | Urine | 74  | <=4 | >16 | <=1 | <=1 | 4   | <=0.06 |
| VII | 2010-S06-050 | Urine | 27  | <=4 | <=2 | <=1 | <=1 | <=2 | <=0.06 |
| VII | 2010-S06-226 | Blood | 33  | <=4 | <=2 | <=2 | <=1 | 2   | <=0.06 |
| VII | 2010-S06-237 | Blood | 33  | <=4 | 4   | <=2 | <=1 | 16  | <=0.06 |
| VII | 2010-S06-243 | Blood | 91  | <=4 | >16 | <=2 | <=1 | 2   | <=0.06 |
| VII | 2010-S07-001 | Blood | 59  | <=4 | 4   | <=2 | <=1 | 2   | <=0.06 |
| VII | 2010-S07-002 | Blood | 33  | <=4 | <=2 | <=2 | <=1 | 2   | <=0.06 |
| VII | 2010-S07-006 | Blood | 40  | 8   | >16 | >16 | >16 | >16 | >2     |
| VII | 2010-S07-007 | Urine | 66  | <=4 | >16 | 16  | 2   | >16 | >2     |
| VII | 2010-S07-012 | Blood | 77  | <=4 | >16 | <=2 | <=1 | >16 | >2     |
| VII | 2010-S07-013 | Blood | 58  | <=4 | 4   | <=2 | <=1 | 2   | 0.12   |
| VII | 2010-S07-015 | Blood | 60  | 8   | >16 | <=2 | <=1 | 4   | 0.25   |
| VII | 2010-S07-023 | Urine | 1   | <=4 | >16 | 8   | 2   | >16 | <=0.06 |
| VII | 2010-S07-025 | Blood | 59  | <=4 | >16 | <=2 | <=1 | >16 | <=0.06 |

|     |              |       |    |     |     |     |     |     |        |
|-----|--------------|-------|----|-----|-----|-----|-----|-----|--------|
| VII | 2010-S07-038 | Urine | 68 | <=4 | >16 | >16 | 4   | >16 | >2     |
| VII | 2010-S07-039 | Other | 87 | <=4 | >16 | 16  | >16 | >16 | >2     |
| VII | 2010-S07-047 | Urine | 83 | <=4 | >16 | 4   | 4   | >16 | >2     |
| VII | 2010-S07-201 | Blood | 55 | <=4 | 4   | <=2 | <=1 | 2   | <=0.06 |
| VII | 2010-S07-207 | Blood | 82 | <=4 | >16 | <=2 | <=1 | 8   | 0.25   |
| VII | 2010-S07-208 | Blood | 81 | <=4 | 4   | <=2 | <=1 | 4   | <=0.06 |
| VII | 2010-S07-209 | Blood | 62 | <=4 | >16 | 8   | 16  | >16 | <=0.06 |
| VII | 2010-S07-210 | Blood | 91 | 16  | >16 | 8   | 16  | >16 | >2     |
| VII | 2010-S07-219 | Blood | 85 | <=4 | >16 | 4   | 16  | >16 | >2     |
| VII | 2010-S07-220 | Blood | 32 | <=4 | >16 | <=2 | <=1 | 4   | 0.25   |
| VII | 2010-S07-229 | Blood | 27 | <=4 | >16 | 4   | 8   | >16 | 0.5    |
| VII | 2010-S07-230 | Blood | 53 | <=4 | <=2 | <=2 | <=1 | 4   | <=0.06 |
| VII | 2010-S07-237 | Blood | 32 | 8   | >16 | <=2 | <=1 | 8   | >2     |
| VII | 2010-S07-246 | Blood | 74 | <=4 | >16 | 8   | 16  | >16 | >2     |
| VII | 2010-S07-249 | Blood | 70 | <=4 | >16 | <=2 | <=1 | 2   | >2     |
| VII | 2010-N05-003 | Urine | 75 | <=4 | <=2 | <=1 | <=1 | <=2 | 0.12   |
| VII | 2010-N05-006 | Urine | 46 | <=4 | >16 | <=1 | <=1 | <=2 | <=0.06 |
| VII | 2010-N05-007 | Urine | 20 | <=4 | >16 | <=1 | <=1 | 4   | <=0.06 |
| VII | 2010-N05-009 | Urine | 26 | <=4 | 4   | <=1 | <=1 | <=2 | <=0.06 |
| VII | 2010-N05-010 | Urine | 94 | 16  | <=2 | <=1 | <=1 | <=2 | <=0.06 |
| VII | 2010-N05-011 | Urine | 39 | <=4 | >16 | <=1 | <=1 | <=2 | >2     |
| VII | 2010-N05-012 | Urine | 62 | <=4 | >16 | <=2 | <=1 | >16 | 0.12   |
| VII | 2010-N05-013 | Urine | 89 | <=4 | >16 | <=1 | <=1 | 4   | >2     |
| VII | 2010-N05-014 | Other | 30 | <=4 | <=2 | <=1 | <=1 | <=2 | <=0.06 |
| VII | 2010-N05-016 | Urine | 43 | <=4 | >16 | 4   | <=1 | >16 | 0.25   |
| VII | 2010-N05-019 | Urine | 60 | <=4 | >16 | <=1 | <=1 | 4   | >2     |
| VII | 2010-N05-020 | Urine | 50 | <=4 | <=2 | <=1 | <=1 | <=2 | <=0.06 |
| VII | 2010-N05-022 | Urine | 55 | <=4 | >16 | <=1 | <=1 | 4   | <=0.06 |
| VII | 2010-N05-025 | Urine | 66 | <=4 | 4   | <=1 | <=1 | <=2 | <=0.06 |
| VII | 2010-N05-028 | Urine | 34 | <=4 | 4   | <=1 | <=1 | <=2 | <=0.06 |
| VII | 2010-N05-029 | Urine | 48 | <=4 | >16 | <=2 | <=1 | 16  | 0.5    |
| VII | 2010-N05-033 | Urine | 56 | <=4 | >16 | <=1 | <=1 | 4   | 0.5    |
| VII | 2010-N05-035 | Urine | 40 | <=4 | 4   | <=1 | <=1 | <=2 | <=0.06 |
| VII | 2010-N05-039 | Urine | 76 | <=4 | >16 | <=2 | 2   | >16 | 0.5    |
| VII | 2010-N05-040 | Urine | 79 | <=4 | <=2 | <=1 | <=1 | <=2 | <=0.06 |
| VII | 2010-N05-043 | Urine | 94 | <=4 | >16 | <=1 | <=1 | 4   | <=0.06 |
| VII | 2010-N05-044 | Other | 51 | <=4 | 4   | <=1 | <=1 | <=2 | <=0.06 |
| VII | 2010-N05-045 | Urine | 25 | <=4 | 4   | <=1 | <=1 | <=2 | <=0.06 |
| VII | 2010-N05-047 | Other | 63 | <=4 | >16 | <=1 | 2   | 4   | 0.25   |
| VII | 2010-N05-048 | Urine | 51 | <=4 | >16 | <=1 | <=1 | <=2 | <=0.06 |
| VII | 2010-N05-214 | Blood |    | <=4 | <=2 | <=2 | <=1 | 2   | <=0.06 |
| VII | 2010-N06-004 | Blood | 81 | <=4 | 4   | <=2 | <=1 | 2   | <=0.06 |
| VII | 2010-N06-005 | Blood | 82 | <=4 | 4   | <=2 | <=1 | 4   | <=0.06 |
| VII | 2010-N06-007 | Urine | 74 | <=4 | 4   | <=1 | <=1 | <=2 | <=0.06 |
| VII | 2010-N06-008 | Urine | 83 | 8   | 4   | <=1 | <=1 | <=2 | <=0.06 |
| VII | 2010-N06-010 | Urine | 27 | <=4 | <=2 | <=1 | <=1 | <=2 | <=0.06 |
| VII | 2010-N06-011 | Urine | 72 | <=4 | >16 | <=1 | <=1 | 8   | <=0.06 |
| VII | 2010-N06-014 | Urine | 51 | <=4 | >16 | <=1 | <=1 | <=2 | <=0.06 |
| VII | 2010-N06-018 | Urine | 28 | <=4 | >16 | <=1 | <=1 | <=2 | <=0.06 |
| VII | 2010-N06-019 | Urine | 80 | <=4 | >16 | 8   | 16  | >16 | 0.25   |
| VII | 2010-N06-021 | Urine | 60 | <=4 | <=2 | <=1 | <=1 | <=2 | <=0.06 |
| VII | 2010-N06-022 | Urine | 66 | <=4 | >16 | <=1 | <=1 | 4   | <=0.06 |
| VII | 2010-N06-031 | Urine | 28 | <=4 | >16 | <=1 | <=1 | 4   | <=0.06 |
| VII | 2010-N06-033 | Urine | 37 | <=4 | <=2 | <=1 | <=1 | <=2 | <=0.06 |
| VII | 2010-N06-035 | Urine | 92 | <=4 | >16 | <=1 | <=1 | 4   | <=0.06 |
| VII | 2010-N06-040 | Urine | 85 | <=4 | >16 | 4   | 16  | >16 | >2     |
| VII | 2010-N06-042 | Urine | 58 | <=4 | >16 | <=1 | <=1 | 16  | <=0.06 |
| VII | 2010-N06-043 | Urine | 69 | <=4 | >16 | <=1 | <=1 | 4   | <=0.06 |
| VII | 2010-N06-044 | Urine | 72 | <=4 | >16 | >16 | >16 | >16 | >2     |
| VII | 2010-N06-050 | Urine | 36 | <=4 | 4   | <=1 | <=1 | <=2 | <=0.06 |
| VII | 2010-N06-212 | Blood | 80 | <=4 | 4   | <=2 | <=1 | 2   | <=0.06 |

|     |              |       |    |     |     |     |     |     |        |
|-----|--------------|-------|----|-----|-----|-----|-----|-----|--------|
| VII | 2010-N06-214 | Blood | 76 | <=4 | >16 | <=2 | 2   | >16 | >2     |
| VII | 2010-N06-221 | Blood | 69 | <=4 | >16 | <=2 | <=1 | 4   | <=0.06 |
| VII | 2010-N06-225 | Blood | 26 | <=4 | 4   | <=2 | <=1 | 2   | <=0.06 |
| VII | 2010-N06-230 | Blood | 51 | <=4 | >16 | <=2 | <=1 | 4   | <=0.06 |
| VII | 2010-N06-247 | Blood | 70 | <=4 | >16 | <=2 | <=1 | 4   | 0.12   |
| VII | 2010-N07-001 | Urine | 50 | <=4 | <=2 | <=1 | <=1 | <=2 | <=0.06 |
| VII | 2010-N07-002 | Urine | 67 | <=4 | <=2 | <=1 | <=1 | <=2 | <=0.06 |
| VII | 2010-N07-003 | Urine | 84 | <=4 | >16 | <=1 | <=1 | 16  | >2     |
| VII | 2010-N07-004 | Urine | 79 | <=4 | >16 | <=1 | <=1 | 8   | <=0.06 |
| VII | 2010-N07-008 | Urine | 68 | <=4 | 4   | <=1 | <=1 | <=2 | 0.25   |
| VII | 2010-N07-010 | Urine | 47 | <=4 | >16 | 2   | 2   | >16 | <=0.06 |
| VII | 2010-N07-012 | Urine | 57 | <=4 | <=2 | <=1 | <=1 | <=2 | <=0.06 |
| VII | 2010-N07-014 | Urine | 76 | >32 | >16 | >16 | 16  | >16 | >2     |
| VII | 2010-N07-017 | Other | 68 | <=4 | 4   | <=1 | <=1 | <=2 | <=0.06 |
| VII | 2010-N07-021 | Urine | 56 | <=4 | >16 | <=1 | <=1 | 16  | 0.5    |
| VII | 2010-N07-022 | Blood | 67 | <=4 | >16 | <=2 | <=1 | 4   | 0.25   |
| VII | 2010-N07-023 | Urine | 94 | 32  | >16 | 8   | 16  | >16 | >2     |
| VII | 2010-N07-026 | Blood | 47 | <=4 | <=2 | <=2 | <=1 | 2   | 0.12   |
| VII | 2010-N07-028 | Blood | 51 | <=4 | >16 | >16 | >16 | >16 | >2     |
| VII | 2010-N07-030 | Urine | 75 | <=4 | <=2 | <=1 | <=1 | <=2 | <=0.06 |
| VII | 2010-N07-032 | Blood | 80 | <=4 | >16 | <=2 | <=1 | >16 | <=0.06 |
| VII | 2010-N07-033 | Blood | 65 | <=4 | 16  | <=2 | <=1 | 2   | 0.12   |
| VII | 2010-N07-034 | Urine | 76 | <=4 | >16 | <=1 | <=1 | 8   | 0.25   |
| VII | 2010-N07-037 | Urine | 41 | <=4 | >16 | 16  | >16 | >16 | >2     |
| VII | 2010-N07-039 | Urine | 20 | <=4 | 4   | <=1 | <=1 | <=2 | <=0.06 |
| VII | 2010-N07-040 | Urine | 41 | <=4 | <=2 | <=1 | <=1 | <=2 | <=0.06 |
| VII | 2010-N07-042 | Blood | 52 | <=4 | >16 | <=2 | <=1 | 2   | <=0.06 |
| VII | 2010-N07-046 | Blood | 53 | <=4 | >16 | <=2 | 4   | >16 | >2     |
| VII | 2010-N07-201 | Blood | 58 | <=4 | 4   | <=2 | <=1 | 2   | <=0.06 |
| VII | 2010-N07-205 | Blood | 68 | <=4 | 4   | <=2 | <=1 | 2   | <=0.06 |
| VII | 2010-N07-225 | Blood | 79 | <=4 | >16 | <=2 | <=1 | 4   | <=0.06 |
| VII | 2010-N07-237 | Blood | 74 | <=4 | >16 | <=2 | <=1 | 8   | <=0.06 |
| VII | 2010-N07-238 | Blood | 40 | <=4 | <=2 | <=2 | <=1 | 2   | <=0.06 |
| VII | 2010-N07-243 | Blood | 64 | <=4 | >16 | <=2 | <=1 | 8   | <=0.06 |
| VII | 2010-N07-247 | Blood | 61 | <=4 | <=2 | <=2 | <=1 | 2   | <=0.06 |
| VII | 2010-N07-250 | Blood | 55 | <=4 | >16 | <=2 | <=1 | 8   | <=0.06 |
| VII | 2010-S08-002 | Urine | 60 | 16  | >16 | <=1 | <=1 | 4   | <=0.06 |
| VII | 2010-S08-003 | Urine | 52 | 8   | >16 | <=1 | <=1 | 8   | <=0.06 |
| VII | 2010-S08-004 | Urine | 28 | <=4 | <=2 | <=1 | <=1 | <=2 | <=0.06 |
| VII | 2010-S08-013 | Urine | 73 | <=4 | >16 | 8   | 4   | >16 | >2     |
| VII | 2010-S08-017 | Blood | 68 | <=4 | >16 | <=2 | <=1 | >16 | <=0.06 |
| VII | 2010-S08-018 | Urine | 79 | <=4 | >16 | >16 | >16 | >16 | 0.25   |
| VII | 2010-S08-023 | Urine | 73 | <=4 | >16 | <=1 | <=1 | 8   | 0.25   |
| VII | 2010-S08-025 | Urine | 24 | <=4 | <=2 | <=1 | <=1 | <=2 | <=0.06 |
| VII | 2010-S08-027 | Urine | 69 | <=4 | >16 | <=1 | <=1 | 8   | <=0.06 |
| VII | 2010-S08-029 | Urine | 90 | <=4 | >16 | 2   | <=1 | >16 | <=0.06 |
| VII | 2010-S08-032 | Urine | 71 | <=4 | >16 | >16 | 4   | >16 | >2     |
| VII | 2010-S08-033 | Urine | 27 | <=4 | >16 | <=1 | <=1 | <=2 | 0.12   |
| VII | 2010-S08-035 | Urine | 80 | <=4 | >16 | 8   | 16  | >16 | >2     |
| VII | 2010-S08-037 | Urine | 75 | <=4 | >16 | <=1 | <=1 | 4   | <=0.06 |
| VII | 2010-S08-039 | Blood | 60 | <=4 | <=2 | <=2 | <=1 | 2   | <=0.06 |
| VII | 2010-S08-044 | Urine | 48 | <=4 | >16 | >16 | >16 | >16 | >2     |
| VII | 2010-S08-045 | Urine | 77 | >32 | >16 | >16 | >16 | >16 | >2     |
| VII | 2010-S08-201 | Other | 41 | <=4 | 4   | <=1 | <=1 | <=2 | <=0.06 |
| VII | 2010-S08-209 | Blood | 59 | <=4 | >16 | <=2 | <=1 | 8   | 0.25   |
| VII | 2010-S08-214 | Blood | 88 | <=4 | >16 | 8   | 16  | >16 | >2     |
| VII | 2010-S08-229 | Blood | 90 | 16  | >16 | >16 | >16 | >16 | >2     |
| VII | 2010-S08-237 | Blood | 62 | <=4 | >16 | >16 | >16 | >16 | >2     |
| VII | 2010-E02-005 | Urine | 92 | <=4 | >16 | <=1 | <=1 | <=2 | <=0.06 |
| VII | 2010-E02-008 | Urine | 42 | <=4 | >16 | <=1 | <=1 | <=2 | <=0.06 |
| VII | 2010-E02-010 | Urine | 73 | <=4 | >16 | <=1 | <=1 | 4   | <=0.06 |

|     |              |       |     |     |     |     |     |     |        |
|-----|--------------|-------|-----|-----|-----|-----|-----|-----|--------|
| VII | 2010-E02-011 | Urine | 57  | <=4 | >16 | <=1 | <=1 | 4   | <=0.06 |
| VII | 2010-E02-012 | Urine | 82  | <=4 | >16 | <=1 | <=1 | 8   | <=0.06 |
| VII | 2010-E02-013 | Urine | 20  | <=4 | <=2 | <=1 | <=1 | <=2 | <=0.06 |
| VII | 2010-E02-014 | Urine | 72  | <=4 | >16 | <=1 | <=1 | 4   | <=0.06 |
| VII | 2010-E02-018 | Urine | 49  | <=4 | >16 | <=1 | <=1 | 4   | >2     |
| VII | 2010-E02-019 | Urine | 101 | <=4 | 4   | <=1 | <=1 | <=2 | <=0.06 |
| VII | 2010-E02-021 | Urine | 80  | <=4 | <=2 | <=1 | <=1 | <=2 | <=0.06 |
| VII | 2010-E02-022 | Urine | 74  | <=4 | 4   | <=1 | <=1 | <=2 | 0.25   |
| VII | 2010-E02-026 | Urine | 58  | <=4 | >16 | <=1 | <=1 | <=2 | <=0.06 |
| VII | 2010-E02-027 | Urine | 72  | <=4 | >16 | <=1 | <=1 | <=2 | 0.12   |
| VII | 2010-E02-031 | Urine | 0   | <=4 | <=2 | <=1 | <=1 | <=2 | <=0.06 |
| VII | 2010-E02-032 | Urine | 71  | <=4 | >16 | <=1 | <=1 | 4   | <=0.06 |
| VII | 2010-E02-033 | Urine | 78  | <=4 | <=2 | <=1 | <=1 | <=2 | 0.5    |
| VII | 2010-E02-034 | Urine | 82  | 8   | >16 | <=1 | <=1 | >16 | 0.12   |
| VII | 2010-E02-036 | Urine | 84  | <=4 | <=2 | <=1 | <=1 | 4   | <=0.06 |
| VII | 2010-E02-038 | Other | 65  | <=4 | <=2 | <=1 | <=1 | <=2 | >2     |
| VII | 2010-E02-040 | Urine | 82  | 8   | >16 | >16 | 16  | >16 | >2     |
| VII | 2010-E02-042 | Urine | 87  | <=4 | >16 | <=1 | <=1 | 4   | >2     |
| VII | 2010-E02-043 | Urine | 82  | <=4 | >16 | <=1 | <=1 | 4   | 0.12   |
| VII | 2010-E02-044 | Blood | 49  | <=4 | 4   | <=2 | <=1 | 2   | <=0.06 |
| VII | 2010-E02-045 | Blood | 60  | <=4 | >16 | <=2 | <=1 | 2   | 0.25   |
| VII | 2010-E02-046 | Blood | 68  | <=4 | >16 | <=2 | <=1 | 4   | 0.5    |
| VII | 2010-E02-047 | Blood | 76  | <=4 | >16 | <=2 | <=1 | 2   | 0.12   |
| VII | 2010-E02-049 | Blood | 73  | <=4 | 4   | <=2 | <=1 | 2   | 1      |
| VII | 2010-E02-050 | Urine | 0   | <=4 | 4   | <=1 | <=1 | <=2 | <=0.06 |
| VII | 2010-E02-201 | Blood | 52  | <=4 | <=2 | <=2 | <=1 | 2   | <=0.06 |
| VII | 2010-N08-005 | Urine | 54  | <=4 | >16 | <=1 | <=1 | <=2 | >2     |
| VII | 2010-N08-006 | Urine | 74  | <=4 | >16 | <=1 | <=1 | <=2 | <=0.06 |
| VII | 2010-N08-007 | Urine | 32  | <=4 | 4   | <=1 | <=1 | <=2 | <=0.06 |
| VII | 2010-N08-008 | Urine | 77  | <=4 | <=2 | <=1 | <=1 | <=2 | <=0.06 |
| VII | 2010-N08-016 | Urine | 21  | <=4 | >16 | <=1 | <=1 | 4   | 0.5    |
| VII | 2010-N08-020 | Urine | 74  | <=4 | >16 | 16  | >16 | >16 | >2     |
| VII | 2010-N08-022 | Urine | 35  | <=4 | >16 | <=1 | <=1 | 4   | <=0.06 |
| VII | 2010-N08-023 | Urine | 28  | <=4 | >16 | 16  | 16  | >16 | <=0.06 |
| VII | 2010-N08-025 | Urine | 3   | <=4 | >16 | <=1 | <=1 | 8   | 0.25   |
| VII | 2010-N08-027 | Urine | 31  | <=4 | >16 | <=1 | <=1 | 4   | <=0.06 |
| VII | 2010-N08-028 | Urine | 84  | <=4 | >16 | <=1 | <=1 | 4   | >2     |
| VII | 2010-N08-030 | Urine | 21  | <=4 | <=2 | <=1 | <=1 | <=2 | 0.25   |
| VII | 2010-N08-031 | Urine | 77  | <=4 | >16 | <=1 | <=1 | <=2 | >2     |
| VII | 2010-N08-032 | Urine | 85  | 8   | 16  | <=1 | <=1 | 4   | <=0.06 |
| VII | 2010-N08-035 | Urine | 22  | <=4 | >16 | <=1 | <=1 | 4   | >2     |
| VII | 2010-N08-036 | Urine | 0   | <=4 | >16 | <=1 | <=1 | 4   | <=0.06 |
| VII | 2010-N08-037 | Urine | 73  | <=4 | >16 | <=1 | <=1 | <=2 | >2     |
| VII | 2010-N08-038 | Urine | 30  | 8   | >16 | <=1 | <=1 | <=2 | <=0.06 |
| VII | 2010-N08-048 | Urine | 55  | <=4 | <=2 | <=1 | <=1 | <=2 | 0.12   |
| VII | 2010-N08-050 | Urine | 26  | <=4 | >16 | <=1 | <=1 | <=2 | >2     |
| VII | 2010-S09-008 | Blood | 51  | <=4 | >16 | <=2 | <=1 | 4   | <=0.06 |
| VII | 2010-S09-009 | Urine | 79  | <=4 | >16 | 16  | 4   | >16 | >2     |
| VII | 2010-S09-010 | Urine | 54  | <=4 | >16 | 16  | >16 | >16 | 2      |
| VII | 2010-S09-016 | Urine | 51  | <=4 | >16 | 8   | 16  | >16 | >2     |
| VII | 2010-S09-018 | Urine | 75  | 16  | <=2 | <=1 | <=1 | <=2 | <=0.06 |
| VII | 2010-S09-021 | Urine | 52  | 8   | <=2 | <=1 | <=1 | <=2 | 0.12   |
| VII | 2010-S09-022 | Blood | 83  | <=4 | <=2 | <=2 | <=1 | 2   | <=0.06 |
| VII | 2010-S09-023 | Blood | 47  | <=4 | <=2 | <=2 | <=1 | 2   | <=0.06 |
| VII | 2010-S09-024 | Blood | 72  | <=4 | >16 | 16  | >16 | >16 | >2     |
| VII | 2010-S09-034 | Urine | 49  | <=4 | >16 | 4   | 8   | >16 | 1      |
| VII | 2010-S09-035 | Urine | 28  | <=4 | >16 | <=1 | <=1 | 16  | <=0.06 |
| VII | 2010-S09-036 | Urine | 55  | <=4 | <=2 | <=1 | <=1 | <=2 | <=0.06 |
| VII | 2010-S09-040 | Urine | 97  | <=4 | <=2 | <=1 | <=1 | <=2 | <=0.06 |
| VII | 2010-S09-041 | Blood | 73  | <=4 | 4   | <=2 | <=1 | 2   | <=0.06 |
| VII | 2010-S09-042 | Blood | 55  | <=4 | >16 | 8   | 16  | >16 | <=0.06 |

|     |              |       |    |     |     |     |     |     |        |
|-----|--------------|-------|----|-----|-----|-----|-----|-----|--------|
| VII | 2010-S09-043 | Blood | 53 | <=4 | >16 | <=2 | <=1 | 4   | <=0.06 |
| VII | 2010-S09-044 | Blood | 70 | <=4 | >16 | <=2 | <=1 | 4   | <=0.06 |
| VII | 2010-S09-194 | Urine | 16 | <=4 | 4   | <=1 | <=1 | 4   | <=0.06 |
| VII | 2010-S09-204 | Blood | 76 | <=4 | <=2 | <=2 | <=1 | <=1 | <=0.06 |
| VII | 2010-S09-205 | Blood | 68 | <=4 | <=2 | <=2 | <=1 | 2   | <=0.06 |
| VII | 2010-S09-209 | Blood | 84 | <=4 | <=2 | <=2 | <=1 | 2   | <=0.06 |
| VII | 2010-S09-210 | Blood | 74 | <=4 | <=2 | <=2 | <=1 | 2   | <=0.06 |
| VII | 2010-S09-212 | Blood | 60 | <=4 | >16 | <=2 | <=1 | 2   | 0.5    |
| VII | 2010-S09-218 | Blood | 89 | <=4 | >16 | <=2 | <=1 | 4   | 0.25   |
| VII | 2010-S09-222 | Blood | 57 | <=4 | >16 | <=2 | <=1 | 4   | <=0.06 |
| VII | 2010-S09-223 | Blood | 88 | <=4 | >16 | <=2 | <=1 | 4   | <=0.06 |
| VII | 2010-S09-231 | Blood | 69 | <=4 | >16 | <=2 | <=1 | 4   | <=0.06 |
| VII | 2010-S09-232 | Blood | 73 | <=4 | >16 | 16  | >16 | >16 | >2     |
| VII | 2010-S09-239 | Blood | 59 | 8   | >16 | 16  | >16 | >16 | >2     |
| VII | 2010-S09-241 | Blood | 54 | <=4 | 4   | <=2 | <=1 | 2   | <=0.06 |
| VII | 2010-S09-243 | Blood | 52 | 8   | >16 | <=2 | <=1 | 4   | <=0.06 |
| VII | 2010-S09-246 | Blood | 71 | <=4 | <=2 | <=2 | <=1 | <=1 | <=0.06 |
| VII | 2010-S09-247 | Blood | 73 | <=4 | <=2 | <=2 | <=1 | <=1 | <=0.06 |
| VII | 2010-E03-002 | Urine | 81 | <=4 | >16 | 16  | >16 | >16 | >2     |
| VII | 2010-E03-004 | Urine | 85 | <=4 | 4   | <=1 | <=1 | <=2 | <=0.06 |
| VII | 2010-E03-010 | Urine | 53 | <=4 | <=2 | <=1 | <=1 | <=2 | <=0.06 |
| VII | 2010-E03-021 | Urine | 78 | <=4 | <=2 | <=1 | <=1 | <=2 | <=0.06 |
| VII | 2010-E03-025 | Urine | 50 | <=4 | >16 | <=1 | <=1 | <=2 | <=0.06 |
| VII | 2010-E03-026 | Urine | 26 | <=4 | <=2 | <=1 | <=1 | <=2 | <=0.06 |
| VII | 2010-E03-032 | Urine | 66 | <=4 | >16 | >16 | >16 | >16 | >2     |
| VII | 2010-E03-033 | Urine | 35 | <=4 | 4   | <=1 | <=1 | <=2 | <=0.06 |
| VII | 2010-E03-037 | Urine | 80 | <=4 | 4   | <=1 | <=1 | <=2 | <=0.06 |
| VII | 2010-E03-039 | Urine | 47 | 8   | >16 | <=2 | <=1 | 16  | >2     |
| VII | 2010-E03-040 | Urine | 62 | <=4 | >16 | <=1 | <=1 | 8   | 0.5    |
| VII | 2010-E03-045 | Urine | 38 | <=4 | >16 | <=2 | <=1 | 16  | <=0.06 |
| VII | 2010-E03-046 | Urine | 59 | <=4 | >16 | <=2 | <=1 | 4   | <=0.06 |
| VII | 2010-E03-048 | Urine | 74 | <=4 | >16 | <=1 | <=1 | 4   | <=0.06 |
| VII | 2010-E03-210 | Blood | 42 | <=4 | >16 | <=2 | <=1 | 2   | 0.12   |
| VII | 2010-E03-215 | Blood | 65 | 8   | 8   | <=2 | <=1 | 8   | <=0.06 |
| VII | 2010-E03-217 | Blood | 52 | <=4 | >16 | 16  | 4   | >16 | >2     |
| VII | 2010-E03-222 | Blood | 78 | <=4 | >16 | 8   | 16  | >16 | 0.12   |
| VII | 2010-E03-227 | Blood | 84 | <=4 | >16 | <=2 | <=1 | 16  | >2     |
| VII | 2010-E03-240 | Blood | 73 | <=4 | >16 | <=2 | <=1 | 16  | 0.5    |
| VII | 2010-C06-006 | Urine | 58 | <=4 | 4   | <=1 | <=1 | <=2 | <=0.06 |
| VII | 2010-C06-009 | Urine | 0  | <=4 | >16 | <=1 | <=1 | 8   | 0.12   |
| VII | 2010-C06-010 | Urine | 65 | <=4 | >16 | <=1 | <=1 | 8   | >2     |
| VII | 2010-C06-014 | Urine | 83 | <=4 | >16 | 8   | 16  | >16 | 1      |
| VII | 2010-C06-015 | Urine | 86 | <=4 | >16 | >16 | 8   | >16 | >2     |
| VII | 2010-C06-016 | Urine | 36 | <=4 | >16 | <=1 | <=1 | 4   | <=0.06 |
| VII | 2010-C06-021 | Urine | 71 | 8   | >16 | 16  | >16 | >16 | >2     |
| VII | 2010-C06-022 | Urine | 69 | <=4 | >16 | <=1 | <=1 | 4   | <=0.06 |
| VII | 2010-C06-025 | Other | 48 | <=4 | >16 | <=1 | <=1 | 8   | 2      |
| VII | 2010-C06-027 | Urine | 55 | <=4 | >16 | <=1 | <=1 | 16  | 0.25   |
| VII | 2010-C06-028 | Urine | 67 | <=4 | >16 | 4   | 16  | >16 | >2     |
| VII | 2010-C06-030 | Urine | 74 | <=4 | >16 | >16 | 16  | >16 | >2     |
| VII | 2010-C06-034 | Urine | 63 | <=4 | <=2 | <=1 | <=1 | <=2 | <=0.06 |
| VII | 2010-C06-037 | Urine | 69 | <=4 | >16 | <=1 | 2   | >16 | >2     |
| VII | 2010-C06-043 | Other | 52 | <=4 | 4   | <=1 | <=1 | <=2 | <=0.06 |
| VII | 2010-C06-044 | Urine | 72 | <=4 | 4   | <=1 | <=1 | <=2 | <=0.06 |
| VII | 2010-C06-045 | Urine | 45 | <=4 | >16 | <=1 | <=1 | 8   | <=0.06 |
| VII | 2010-C06-046 | Urine | 59 | <=4 | >16 | <=1 | <=1 | 4   | >2     |
| VII | 2010-C06-049 | Other | 32 | <=4 | >16 | <=1 | <=1 | 4   | <=0.06 |
| VII | 2010-C06-057 | Other | 52 | <=4 | >16 | <=1 | <=1 | 8   | >2     |
| VII | 2010-C06-174 | Urine | 91 | <=4 | >16 | 16  | 4   | >16 | >2     |
| VII | 2010-C06-177 | Urine | 82 | <=4 | >16 | >16 | >16 | >16 | >2     |
| VII | 2010-C07-008 | Other | 39 | <=4 | >16 | 4   | >16 | >16 | >2     |



|     |              |       |    |     |     |     |     |     |        |
|-----|--------------|-------|----|-----|-----|-----|-----|-----|--------|
| VII | 2010-C07-014 | Urine | 1  | <=4 | >16 | 4   | 8   | >16 | <=0.06 |
| VII | 2010-C07-015 | Urine | 81 | <=4 | <=2 | <=1 | <=1 | <=2 | <=0.06 |
| VII | 2010-C07-017 | Urine | 25 | <=4 | >16 | <=1 | <=1 | >16 | <=0.06 |
| VII | 2010-C07-021 | Urine | 44 | <=4 | >16 | <=1 | <=1 | 8   | >2     |
| VII | 2010-C07-022 | Urine | 45 | <=4 | >16 | <=1 | <=1 | <=2 | <=0.06 |
| VII | 2010-C07-024 | Urine | 37 | <=4 | >16 | <=1 | <=1 | <=2 | <=0.06 |
| VII | 2010-C07-025 | Urine | 81 | <=4 | >16 | <=1 | <=1 | 4   | 0.25   |
| VII | 2010-C07-031 | Other | 47 | <=4 | >16 | <=1 | <=1 | 4   | >2     |
| VII | 2010-C07-033 | Urine | 82 | <=4 | >16 | <=1 | <=1 | <=2 | <=0.06 |
| VII | 2010-C07-036 | Other | 38 | <=4 | 4   | <=1 | <=1 | 4   | <=0.06 |
| VII | 2010-C07-037 | Urine | 80 | <=4 | >16 | 4   | 2   | >16 | >2     |
| VII | 2010-C07-039 | Other | 35 | <=4 | 4   | <=1 | <=1 | <=2 | <=0.06 |
| VII | 2010-C07-041 | Urine | 70 | <=4 | 8   | <=1 | 2   | 4   | <=0.06 |
| VII | 2010-C07-043 | Urine | 54 | 8   | >16 | <=1 | <=1 | 16  | >2     |
| VII | 2010-C07-045 | Blood | 76 | <=4 | >16 | >16 | 16  | >16 | >2     |
| VII | 2010-C07-050 | Urine | 59 | <=4 | <=2 | <=1 | <=1 | <=2 | <=0.06 |
| VII | 2010-C07-202 | Blood | 85 | <=4 | >16 | <=2 | <=1 | 4   | <=0.06 |
| VII | 2010-C07-210 | Blood | 67 | <=4 | 4   | <=2 | <=1 | 4   | <=0.06 |
| VII | 2010-C07-211 | Blood | 64 | <=4 | 4   | <=2 | <=1 | 2   | 0.12   |
| VII | 2010-C07-212 | Blood | 66 | <=4 | >16 | >16 | >16 | >16 | >2     |
| VII | 2010-C07-224 | Blood | 78 | <=4 | <=2 | <=2 | <=1 | 2   | >2     |
| VII | 2010-C07-226 | Other | 58 | <=4 | >16 | <=1 | <=1 | >16 | >2     |
| VII | 2010-C07-234 | Blood | 56 | <=4 | >16 | 4   | 8   | >16 | <=0.06 |
| VII | 2010-C07-238 | Other | 62 | <=4 | >16 | <=1 | <=1 | 4   | >2     |
| VII | 2010-C07-243 | Blood | 84 | <=4 | >16 | <=2 | <=1 | 4   | 0.25   |
| VII | 2010-N16-002 | Urine | 61 | <=4 | 4   | <=1 | <=1 | 4   | <=0.06 |
| VII | 2010-N16-010 | Urine | 61 | <=4 | >16 | <=1 | <=1 | <=2 | >2     |
| VII | 2010-N16-013 | Urine | 66 | <=4 | >16 | <=1 | <=1 | 16  | >2     |
| VII | 2010-N16-014 | Blood | 71 | <=4 | >16 | <=2 | <=1 | 2   | <=0.06 |
| VII | 2010-N16-016 | Blood | 81 | <=4 | <=2 | <=2 | <=1 | <=1 | <=0.06 |
| VII | 2010-N16-019 | Urine | 58 | <=4 | >16 | <=1 | <=1 | 4   | 0.25   |
| VII | 2010-N16-023 | Urine | 0  | <=4 | >16 | <=1 | <=1 | <=2 | 0.5    |
| VII | 2010-N16-026 | Urine | 89 | <=4 | >16 | <=1 | <=1 | 4   | >2     |
| VII | 2010-N16-029 | Other | 18 | <=4 | >16 | <=1 | <=1 | 4   | 0.25   |
| VII | 2010-N16-031 | Urine | 2  | <=4 | >16 | 8   | 2   | >16 | 0.25   |
| VII | 2010-N16-033 | Urine | 42 | <=4 | >16 | 4   | <=1 | >16 | >2     |
| VII | 2010-N16-034 | Urine | 59 | <=4 | >16 | <=1 | <=1 | <=2 | 0.12   |
| VII | 2010-N16-038 | Blood | 79 | <=4 | <=2 | <=2 | <=1 | <=1 | 2      |
| VII | 2010-N16-041 | Blood | 85 | <=4 | >16 | <=2 | <=1 | 16  | <=0.06 |
| VII | 2010-N16-201 | Blood | 81 | <=4 | >16 | <=2 | <=1 | 2   | <=0.06 |
| VII | 2010-N16-202 | Blood | 80 | <=4 | >16 | <=2 | <=1 | 16  | <=0.06 |
| VII | 2010-N16-203 | Blood | 89 | <=4 | <=2 | <=2 | <=1 | 2   | <=0.06 |
| VII | 2010-N16-204 | Blood | 68 | <=4 | >16 | <=2 | <=1 | 4   | >2     |
| VII | 2010-N16-207 | Blood | 71 | <=4 | <=2 | <=2 | <=1 | 4   | <=0.06 |
| VII | 2010-N16-208 | Blood | 86 | <=4 | >16 | <=2 | <=1 | 16  | <=0.06 |
| VII | 2010-N16-212 | Blood | 79 | <=4 | >16 | <=2 | <=1 | 2   | <=0.06 |
| VII | 2010-N16-213 | Blood | 74 | <=4 | >16 | <=2 | <=1 | 4   | <=0.06 |
| VII | 2010-N16-215 | Other | 75 | <=4 | >16 | <=1 | <=1 | <=2 | <=0.06 |
| VII | 2010-N16-218 | Blood | 56 | <=4 | >16 | <=2 | <=1 | 4   | 0.25   |
| VII | 2010-N16-221 | Blood | 87 | <=4 | <=2 | <=2 | <=1 | <=1 | <=0.06 |
| VII | 2010-N16-229 | Blood | 70 | 8   | >16 | 16  | 2   | >16 | >2     |
| VII | 2010-N16-232 | Blood | 88 | <=4 | >16 | 16  | >16 | >16 | 0.5    |
| VII | 2010-N16-238 | Blood | 68 | <=4 | <=2 | <=2 | <=1 | 2   | <=0.06 |
| VII | 2010-N16-244 | Blood | 57 | <=4 | >16 | 8   | >16 | >16 | <=0.06 |
| VII | 2010-N16-245 | Blood | 88 | <=4 | <=2 | <=2 | <=1 | 2   | <=0.06 |
| VII | 2010-N16-246 | Blood | 85 | <=4 | <=2 | <=2 | <=1 | <=1 | <=0.06 |
| VII | 2010-N17-002 | Urine | 64 | <=4 | <=2 | <=1 | <=1 | <=2 | <=0.06 |
| VII | 2010-N17-004 | Urine | 0  | <=4 | >16 | <=1 | <=1 | <=2 | <=0.06 |
| VII | 2010-N17-005 | Urine | 0  | <=4 | >16 | <=1 | <=1 | <=2 | 0.25   |
| VII | 2010-N17-006 | Urine | 1  | <=4 | >16 | <=1 | <=1 | <=2 | <=0.06 |
| VII | 2010-N17-013 | Urine | 33 | <=4 | 4   | <=1 | <=1 | <=2 | <=0.06 |

|     |              |       |     |     |     |     |     |     |        |
|-----|--------------|-------|-----|-----|-----|-----|-----|-----|--------|
| VII | 2010-N17-017 | Urine | 32  | <=4 | <=2 | <=1 | <=1 | <=2 | <=0.06 |
| VII | 2010-N17-022 | Urine | 7   | <=4 | <=2 | <=1 | <=1 | <=2 | 0.25   |
| VII | 2010-N17-024 | Urine | 3   | <=4 | 4   | <=1 | <=1 | <=2 | <=0.06 |
| VII | 2010-N17-026 | Urine | 82  | <=4 | 8   | <=1 | <=1 | <=2 | <=0.06 |
| VII | 2010-N17-032 | Urine | 54  | <=4 | >16 | <=1 | <=1 | <=2 | 0.5    |
| VII | 2010-N17-033 | Urine | 2   | <=4 | 4   | <=1 | <=1 | <=2 | <=0.06 |
| VII | 2010-N17-043 | Urine | 84  | <=4 | <=2 | <=1 | <=1 | <=2 | <=0.06 |
| VII | 2010-N17-044 | Urine | 71  | <=4 | >16 | <=1 | <=1 | 8   | <=0.06 |
| VII | 2010-N17-045 | Urine | 36  | <=4 | >16 | <=1 | <=1 | 4   | <=0.06 |
| VII | 2010-N17-047 | Urine | 89  | <=4 | >16 | 4   | 8   | >16 | 0.5    |
| VII | 2010-N17-048 | Urine | 89  | <=4 | >16 | <=1 | <=1 | <=2 | 0.25   |
| VII | 2010-N17-049 | Urine | 25  | <=4 | >16 | <=1 | <=1 | 8   | >2     |
| VII | 2010-N17-205 | Blood | 91  | <=4 | >16 | <=2 | <=1 | 8   | <=0.06 |
| VII | 2010-N17-213 | Blood | 58  | <=4 | >16 | <=2 | <=1 | 2   | <=0.06 |
| VII | 2010-N17-227 | Blood | 88  | <=4 | >16 | >16 | >16 | >16 | >2     |
| VII | 2010-N17-228 | Blood | 77  | <=4 | >16 | <=2 | <=1 | 8   | <=0.06 |
| VII | 2010-N17-229 | Blood | 71  | <=4 | >16 | <=2 | <=1 | 4   | <=0.06 |
| VII | 2010-N17-234 | Blood | 53  | 8   | >16 | >16 | >16 | >16 | >2     |
| VII | 2010-N17-240 | Blood | 73  | <=4 | >16 | 8   | 4   | >16 | >2     |
| VII | 2010-N19-001 | Urine | 33  | <=4 | >16 | <=1 | <=1 | 16  | >2     |
| VII | 2010-N19-002 | Urine | 69  | <=4 | <=2 | <=1 | <=1 | <=2 | <=0.06 |
| VII | 2010-N19-003 | Urine | 29  | <=4 | >16 | <=1 | <=1 | 4   | >2     |
| VII | 2010-N19-004 | Urine | 85  | <=4 | >16 | >16 | >16 | >16 | >2     |
| VII | 2010-N19-006 | Urine | 43  | <=4 | >16 | <=1 | <=1 | 8   | >2     |
| VII | 2010-N19-007 | Urine | 80  | <=4 | >16 | 4   | 16  | >16 | <=0.06 |
| VII | 2010-N19-008 | Urine | 37  | <=4 | >16 | <=1 | <=1 | <=2 | <=0.06 |
| VII | 2010-N19-011 | Other | 60  | <=4 | <=2 | <=1 | <=1 | <=2 | 0.12   |
| VII | 2010-N19-014 | Urine | 53  | <=4 | <=2 | <=1 | <=1 | <=2 | <=0.06 |
| VII | 2010-N19-015 | Urine | 77  | <=4 | >16 | >16 | 16  | >16 | >2     |
| VII | 2010-N19-016 | Urine | 81  | 8   | >16 | >16 | 2   | >16 | >2     |
| VII | 2010-N19-017 | Urine | 83  | <=4 | <=2 | <=1 | <=1 | <=2 | <=0.06 |
| VII | 2010-N19-018 | Other | 61  | <=4 | >16 | <=1 | <=1 | 4   | 0.5    |
| VII | 2010-N19-025 | Urine | 50  | <=4 | <=2 | <=1 | <=1 | <=2 | <=0.06 |
| VII | 2010-N19-033 | Urine | 39  | <=4 | <=2 | <=1 | <=1 | <=2 | <=0.06 |
| VII | 2010-N19-034 | Urine | 78  | <=4 | >16 | <=1 | <=1 | <=2 | <=0.06 |
| VII | 2010-N19-035 | Urine | 66  | <=4 | <=2 | <=1 | <=1 | <=2 | <=0.06 |
| VII | 2010-N19-039 | Urine | 57  | <=4 | >16 | <=1 | <=1 | <=2 | <=0.06 |
| VII | 2010-N19-040 | Urine | 76  | <=4 | 4   | <=1 | <=1 | <=2 | >2     |
| VII | 2010-N19-043 | Urine | 85  | <=4 | <=2 | <=1 | <=1 | <=2 | <=0.06 |
| VII | 2010-N19-044 | Blood | 58  | <=4 | 4   | <=2 | <=1 | 2   | <=0.06 |
| VII | 2010-N19-046 | Urine | 55  | <=4 | >16 | <=1 | <=1 | 16  | >2     |
| VII | 2010-N19-047 | Urine | 45  | <=4 | <=2 | <=1 | <=1 | <=2 | <=0.06 |
| VII | 2010-N19-048 | Urine | 22  | <=4 | 4   | <=1 | <=1 | <=2 | 0.25   |
| VII | 2010-N19-050 | Urine | 52  | <=4 | >16 | <=1 | <=1 | <=2 | <=0.06 |
| VII | 2010-C08-004 | Urine | 47  | <=4 | <=2 | <=1 | <=1 | <=2 | <=0.06 |
| VII | 2010-C08-005 | Urine | 53  | <=4 | >16 | <=1 | <=1 | <=2 | >2     |
| VII | 2010-C08-006 | Urine | 22  | <=4 | 4   | <=1 | <=1 | <=2 | <=0.06 |
| VII | 2010-C08-007 | Urine | 50  | <=4 | >16 | <=1 | <=1 | >16 | <=0.06 |
| VII | 2010-C08-008 | Urine | 66  | <=4 | >16 | <=1 | <=1 | 8   | 0.12   |
| VII | 2010-C08-013 | Urine | 75  | <=4 | >16 | <=1 | <=1 | 4   | >2     |
| VII | 2010-C08-017 | Urine | 28  | <=4 | >16 | <=1 | <=1 | <=2 | 0.5    |
| VII | 2010-C08-018 | Urine | 82  | <=4 | 4   | <=1 | <=1 | <=2 | <=0.06 |
| VII | 2010-C08-019 | Urine | 78  | <=4 | <=2 | <=1 | <=1 | <=2 | <=0.06 |
| VII | 2010-C08-020 | Urine | 42  | <=4 | 4   | <=1 | <=1 | <=2 | <=0.06 |
| VII | 2010-C08-021 | Urine | 20m | <=4 | >16 | <=1 | <=1 | <=2 | 0.12   |
| VII | 2010-C08-022 | Urine | 50  | 8   | >16 | <=1 | <=1 | 8   | 1      |
| VII | 2010-C08-024 | Urine | 53  | <=4 | >16 | <=1 | <=1 | <=2 | 0.5    |
| VII | 2010-C08-027 | Other | 59  | <=4 | >16 | <=1 | <=1 | <=2 | <=0.06 |
| VII | 2010-C08-028 | Other | 73  | <=4 | 16  | <=1 | <=1 | 16  | <=0.06 |
| VII | 2010-C08-030 | Urine | 57  | <=4 | >16 | <=1 | <=1 | >16 | <=0.06 |
| VII | 2010-C08-032 | Urine | 51  | <=4 | >16 | >16 | >16 | >16 | >2     |

|     |              |       |    |     |     |     |     |     |        |
|-----|--------------|-------|----|-----|-----|-----|-----|-----|--------|
| VII | 2010-C08-033 | Urine | 75 | <=4 | 4   | <=1 | <=1 | <=2 | <=0.06 |
| VII | 2010-C08-034 | Urine | 84 | <=4 | >16 | <=1 | <=1 | 4   | >2     |
| VII | 2010-C08-035 | Urine | 57 | <=4 | >16 | <=1 | <=1 | 8   | <=0.06 |
| VII | 2010-C08-038 | Other | 19 | <=4 | >16 | <=1 | <=1 | 8   | <=0.06 |
| VII | 2010-C08-040 | Urine | 28 | <=4 | >16 | <=1 | <=1 | <=2 | <=0.06 |
| VII | 2010-C08-193 | Urine | 6  | <=4 | 4   | <=1 | <=1 | <=2 | <=0.06 |
| VII | 2010-C08-200 | Urine | 3  | <=4 | >16 | <=1 | <=1 | 8   | <=0.06 |
| VII | 2010-C08-209 | Blood | 60 | <=4 | <=2 | <=2 | <=1 | 2   | <=0.06 |
| VII | 2010-C08-213 | Blood | 73 | <=4 | >16 | <=2 | <=1 | 2   | <=0.06 |
| VII | 2010-C08-216 | Blood | 21 | <=4 | >16 | <=2 | <=1 | 8   | 0.25   |
| VII | 2010-C08-226 | Blood | 51 | <=4 | >16 | <=2 | <=1 | 4   | <=0.06 |
| VII | 2010-C08-232 | Blood | 58 | <=4 | >16 | <=2 | <=1 | 2   | 0.12   |
| VII | 2010-C08-241 | Blood | 78 | <=4 | >16 | <=2 | 4   | >16 | >2     |
| VII | 2010-S11-005 | Urine | 1  | <=4 | >16 | <=1 | <=1 | <=2 | <=0.06 |
| VII | 2010-S11-007 | Urine | 56 | <=4 | >16 | <=1 | <=1 | 4   | <=0.06 |
| VII | 2010-S11-008 | Urine | 72 | <=4 | 4   | <=1 | <=1 | <=2 | <=0.06 |
| VII | 2010-S11-009 | Urine | 85 | <=4 | <=2 | <=1 | <=1 | <=2 | <=0.06 |
| VII | 2010-S11-010 | Urine | 64 | <=4 | >16 | <=1 | <=1 | <=2 | <=0.06 |
| VII | 2010-S11-011 | Urine | 71 | <=4 | 4   | <=1 | <=1 | <=2 | <=0.06 |
| VII | 2010-S11-012 | Blood | 64 | <=4 | <=2 | <=2 | <=1 | 2   | <=0.06 |
| VII | 2010-S11-015 | Urine | 67 | <=4 | >16 | <=1 | <=1 | 4   | <=0.06 |
| VII | 2010-S11-016 | Urine | 14 | <=4 | >16 | <=1 | 2   | >16 | >2     |
| VII | 2010-S11-017 | Urine | 71 | <=4 | >16 | <=1 | <=1 | 4   | >2     |
| VII | 2010-S11-018 | Urine | 73 | <=4 | 4   | <=1 | <=1 | 4   | <=0.06 |
| VII | 2010-S11-021 | Urine | 87 | <=4 | >16 | <=1 | <=1 | <=2 | >2     |
| VII | 2010-S11-031 | Blood | 62 | 8   | >16 | <=2 | <=1 | 8   | <=0.06 |
| VII | 2010-S11-033 | Urine | 72 | <=4 | <=2 | <=1 | <=1 | <=2 | <=0.06 |
| VII | 2010-S11-039 | Urine | 75 | <=4 | >16 | 4   | 8   | >16 | >2     |
| VII | 2010-S11-042 | Urine | 78 | <=4 | >16 | <=1 | <=1 | 4   | <=0.06 |
| VII | 2010-S11-045 | Urine | 83 | 8   | >16 | >16 | 16  | >16 | >2     |
| VII | 2010-S11-046 | Urine | 0  | <=4 | >16 | <=1 | <=1 | 4   | >2     |
| VII | 2010-S11-048 | Urine | 66 | <=4 | >16 | <=1 | <=1 | >16 | <=0.06 |
| VII | 2010-S11-201 | Blood | 77 | <=4 | 4   | <=2 | <=1 | 2   | 0.12   |
| VII | 2010-S11-205 | Blood | 70 | 32  | >16 | 16  | <=1 | 4   | >2     |
| VII | 2010-S11-207 | Blood | 89 | <=4 | >16 | <=2 | <=1 | 16  | <=0.06 |
| VII | 2010-S11-208 | Blood | 87 | <=4 | >16 | <=2 | <=1 | 8   | <=0.06 |
| VII | 2010-S11-209 | Blood | 45 | <=4 | >16 | <=2 | <=1 | 4   | 0.25   |
| VII | 2010-S11-210 | Blood | 59 | <=4 | >16 | <=2 | <=1 | 8   | <=0.06 |
| VII | 2010-S11-211 | Blood | 36 | 16  | >16 | <=2 | <=1 | 8   | >2     |
| VII | 2010-S11-219 | Blood | 48 | <=4 | >16 | <=2 | <=1 | 2   | <=0.06 |
| VII | 2010-S11-226 | Blood | 77 | >32 | >16 | >16 | >16 | >16 | >2     |
| VII | 2010-S11-231 | Blood | 59 | <=4 | >16 | <=2 | <=1 | 8   | 0.12   |
| VII | 2010-S11-234 | Blood | 53 | 8   | >16 | >16 | 16  | >16 | >2     |
| VII | 2010-S11-237 | Blood | 79 | <=4 | <=2 | <=2 | <=1 | 2   | <=0.06 |
| VII | 2010-S11-242 | Blood | 33 | <=4 | >16 | <=2 | <=1 | 2   | 0.12   |
| VII | 2010-N21-003 | Blood | 62 | <=4 | >16 | 4   | 8   | >16 | >2     |
| VII | 2010-N21-005 | Blood | 73 | <=4 | >16 | <=2 | <=1 | 2   | <=0.06 |
| VII | 2010-N21-009 | Other | 71 | <=4 | >16 | 8   | 16  | >16 | >2     |
| VII | 2010-N21-013 | Urine | 31 | <=4 | >16 | <=1 | <=1 | <=2 | <=0.06 |
| VII | 2010-N21-019 | Urine | 0  | <=4 | 4   | <=1 | <=1 | <=2 | <=0.06 |
| VII | 2010-N21-022 | Urine | 47 | <=4 | <=2 | <=1 | <=1 | <=2 | <=0.06 |
| VII | 2010-N21-026 | Blood | 53 | <=4 | <=2 | <=2 | <=1 | 2   | <=0.06 |
| VII | 2010-N21-028 | Blood | 82 | <=4 | >16 | <=2 | <=1 | 8   | 0.25   |
| VII | 2010-N21-029 | Blood | 74 | <=4 | 4   | <=2 | <=1 | 2   | <=0.06 |
| VII | 2010-N21-030 | Blood | 40 | <=4 | >16 | <=2 | <=1 | 16  | <=0.06 |
| VII | 2010-N21-031 | Blood | 65 | <=4 | >16 | <=2 | <=1 | 4   | 0.25   |
| VII | 2010-N21-032 | Blood | 64 | 8   | 4   | <=2 | <=1 | 2   | <=0.06 |
| VII | 2010-N21-033 | Blood | 83 | <=4 | 4   | <=2 | <=1 | 2   | <=0.06 |
| VII | 2010-N21-034 | Blood | 18 | <=4 | >16 | <=2 | <=1 | 4   | <=0.06 |
| VII | 2010-N21-035 | Blood | 74 | <=4 | >16 | <=2 | <=1 | 2   | 0.12   |
| VII | 2010-N21-036 | Blood | 37 | <=4 | <=2 | <=2 | <=1 | 2   | <=0.06 |

|     |              |       |    |     |     |     |     |     |        |
|-----|--------------|-------|----|-----|-----|-----|-----|-----|--------|
| VII | 2010-N21-193 | Urine | 0  | <=4 | >16 | <=1 | <=1 | <=2 | <=0.06 |
| VII | 2010-N21-216 | Blood | 87 | <=4 | >16 | <=2 | <=1 | 16  | <=0.06 |
| VII | 2010-N21-223 | Blood | 49 | <=4 | <=2 | <=2 | <=1 | <=1 | <=0.06 |
| VII | 2010-N21-225 | Blood | 51 | <=4 | >16 | <=2 | <=1 | 4   | 0.12   |
| VII | 2010-N21-228 | Blood | 79 | <=4 | >16 | <=2 | <=1 | 8   | <=0.06 |
| VII | 2010-N21-237 | Blood | 66 | <=4 | >16 | <=2 | <=1 | 2   | 0.12   |
| VII | 2010-N21-240 | Blood | 43 | <=4 | 4   | <=2 | <=1 | 2   | 0.5    |
| VII | 2010-N21-241 | Blood | 59 | <=4 | <=2 | <=2 | <=1 | <=1 | <=0.06 |
| VII | 2010-N21-247 | Blood | 81 | <=4 | >16 | <=2 | <=1 | 2   | 0.12   |
| VII | 2010-N21-249 | Blood | 69 | <=4 | <=2 | <=2 | <=1 | 2   | <=0.06 |
| VII | 2010-N21-250 | Blood | 76 | <=4 | >16 | <=2 | <=1 | >16 | >2     |
| VII | 2010-C09-001 | Urine | 57 | <=4 | >16 | <=1 | <=1 | 4   | 0.25   |
| VII | 2010-C09-002 | Urine | 69 | <=4 | >16 | <=1 | <=1 | >16 | >2     |
| VII | 2010-C09-004 | Urine | 38 | <=4 | >16 | <=1 | <=1 | <=2 | 0.12   |
| VII | 2010-C09-009 | Urine | 21 | <=4 | >16 | <=1 | <=1 | <=2 | <=0.06 |
| VII | 2010-C09-013 | Urine | 79 | <=4 | <=2 | <=1 | <=1 | <=2 | <=0.06 |
| VII | 2010-C09-014 | Other |    | <=4 | >16 | <=1 | <=1 | <=2 | <=0.06 |
| VII | 2010-C09-015 | Urine | 48 | <=4 | >16 | <=1 | <=1 | <=2 | 0.12   |
| VII | 2010-C09-017 | Blood | 91 | <=4 | <=2 | <=2 | <=1 | 2   | <=0.06 |
| VII | 2010-C09-020 | Blood | 54 | <=4 | >16 | <=2 | <=1 | 4   | <=0.06 |
| VII | 2010-C09-023 | Blood | 55 | <=4 | 4   | <=2 | <=1 | 2   | <=0.06 |
| VII | 2010-C09-024 | Urine | 48 | <=4 | >16 | <=1 | <=1 | 4   | >2     |
| VII | 2010-C09-026 | Other | 59 | <=4 | >16 | <=1 | <=1 | <=2 | <=0.06 |
| VII | 2010-C09-028 | Urine | 2  | <=4 | >16 | <=1 | <=1 | 4   | <=0.06 |
| VII | 2010-C09-034 | Urine | 79 | <=4 | >16 | <=1 | <=1 | 16  | >2     |
| VII | 2010-C09-035 | Urine | 64 | <=4 | >16 | <=1 | <=1 | 4   | 0.25   |
| VII | 2010-C09-045 | Urine | 92 | 8   | >16 | >16 | >16 | >16 | >2     |
| VII | 2010-C09-048 | Urine | 1  | <=4 | 4   | <=1 | <=1 | <=2 | <=0.06 |
| VII | 2010-C09-049 | Other | 60 | <=4 | >16 | <=1 | <=1 | <=2 | <=0.06 |
| VII | 2010-C09-050 | Urine | 32 | <=4 | 4   | <=1 | <=1 | <=2 | <=0.06 |
| VII | 2010-C09-211 | Blood | 82 | <=4 | <=2 | <=2 | <=1 | <=1 | <=0.06 |
| VII | 2010-C09-237 | Blood | 58 | <=4 | >16 | <=2 | <=1 | 8   | 0.25   |
| VII | 2010-C09-238 | Blood | 82 | <=4 | 4   | <=2 | <=1 | 2   | 0.12   |
| VII | 2010-C09-246 | Blood | 36 | <=4 | >16 | <=2 | <=1 | 4   | <=0.06 |
| VII | 2010-C09-248 | Blood | 81 | <=4 | >16 | <=2 | <=1 | 16  | <=0.06 |
| VII | 2010-C10-001 | Blood | 64 | <=4 | <=2 | <=2 | <=1 | 2   | 0.25   |
| VII | 2010-C10-002 | Urine | 78 | <=4 | 4   | <=1 | <=1 | <=2 | <=0.06 |
| VII | 2010-C10-005 | Urine | 64 | <=4 | >16 | <=1 | <=1 | <=2 | 0.12   |
| VII | 2010-C10-006 | Urine | 35 | <=4 | 4   | <=1 | <=1 | <=2 | 0.12   |
| VII | 2010-C10-007 | Urine | 77 | <=4 | 8   | <=1 | <=1 | <=2 | <=0.06 |
| VII | 2010-C10-011 | Blood | 74 | <=4 | >16 | <=2 | <=1 | 4   | 0.25   |
| VII | 2010-C10-012 | Urine | 70 | <=4 | >16 | 8   | 4   | >16 | >2     |
| VII | 2010-C10-013 | Blood | 66 | <=4 | <=2 | <=2 | <=1 | 2   | <=0.06 |
| VII | 2010-C10-020 | Urine | 58 | <=4 | >16 | >16 | >16 | >16 | >2     |
| VII | 2010-C10-021 | Blood | 78 | <=4 | >16 | <=2 | <=1 | 4   | <=0.06 |
| VII | 2010-C10-022 | Blood | 86 | 16  | >16 | 16  | >16 | >16 | >2     |
| VII | 2010-C10-023 | Urine | 87 | <=4 | >16 | <=1 | <=1 | 8   | 0.25   |
| VII | 2010-C10-032 | Urine | 51 | <=4 | >16 | <=1 | <=1 | <=2 | 0.12   |
| VII | 2010-C10-034 | Urine | 38 | <=4 | >16 | <=1 | <=1 | 4   | <=0.06 |
| VII | 2010-C10-035 | Urine | 72 | >32 | >16 | >16 | >16 | >16 | >2     |
| VII | 2010-C10-039 | Urine | 74 | <=4 | 4   | <=1 | <=1 | <=2 | <=0.06 |
| VII | 2010-C10-040 | Urine | 27 | <=4 | 4   | <=1 | <=1 | <=2 | <=0.06 |
| VII | 2010-C10-041 | Urine | 53 | <=4 | >16 | <=1 | <=1 | 4   | <=0.06 |
| VII | 2010-C10-042 | Urine | 54 | <=4 | 4   | <=1 | <=1 | <=2 | <=0.06 |
| VII | 2010-C10-043 | Urine | 46 | <=4 | <=2 | <=1 | <=1 | <=2 | <=0.06 |
| VII | 2010-C10-184 | Urine | 1  | <=4 | >16 | <=1 | <=1 | 4   | <=0.06 |
| VII | 2010-C10-194 | Urine | 7  | <=4 | >16 | <=1 | <=1 | 4   | >2     |
| VII | 2010-C10-198 | Urine | 1  | <=4 | >16 | <=1 | <=1 | <=2 | <=0.06 |
| VII | 2010-C10-208 | Blood | 68 | <=4 | <=2 | <=2 | <=1 | 2   | <=0.06 |
| VII | 2010-C10-209 | Blood | 46 | 8   | >16 | 16  | >16 | >16 | 0.12   |
| VII | 2010-C10-210 | Blood | 27 | <=4 | >16 | <=2 | <=1 | 8   | <=0.06 |

|      |              |       |    |     |     |     |     |     |        |
|------|--------------|-------|----|-----|-----|-----|-----|-----|--------|
| VII  | 2010-C10-215 | Blood | 92 | <=4 | 4   | <=2 | <=1 | 2   | <=0.06 |
| VII  | 2010-C10-216 | Blood | 74 | <=4 | >16 | <=2 | <=1 | 4   | <=0.06 |
| VII  | 2010-C10-222 | Other | 49 | <=4 | >16 | >16 | 8   | >16 | 0.5    |
| VII  | 2010-C10-230 | Blood | 58 | <=4 | 4   | <=2 | <=1 | 2   | <=0.06 |
| VII  | 2010-C10-249 | Blood | 88 | <=4 | >16 | <=2 | <=1 | 8   | <=0.06 |
| VII  | 2010-E04-002 | Blood | 36 | <=4 | 4   | <=2 | <=1 | 2   | <=0.06 |
| VII  | 2010-E04-004 | Blood | 91 | <=4 | >16 | >16 | >16 | >16 | >2     |
| VII  | 2010-E04-005 | Blood | 74 | <=4 | >16 | <=2 | <=1 | 2   | 0.12   |
| VII  | 2010-E04-014 | Blood | 67 | <=4 | >16 | <=2 | <=1 | 4   | <=0.06 |
| VII  | 2010-E04-016 | Blood | 88 | <=4 | >16 | <=2 | <=1 | 4   | 0.25   |
| VII  | 2010-E04-019 | Blood | 59 | <=4 | <=2 | <=2 | <=1 | 2   | <=0.06 |
| VII  | 2010-E04-020 | Blood | 70 | <=4 | <=2 | <=2 | <=1 | 2   | <=0.06 |
| VII  | 2010-E04-021 | Blood | 90 | <=4 | 4   | <=2 | <=1 | 2   | <=0.06 |
| VII  | 2010-E04-022 | Blood | 88 | <=4 | 4   | <=2 | <=1 | 2   | <=0.06 |
| VII  | 2010-E04-024 | Blood | 64 | <=4 | >16 | <=2 | <=1 | 4   | <=0.06 |
| VII  | 2010-E04-029 | Blood | 73 | <=4 | >16 | <=2 | <=1 | 4   | <=0.06 |
| VII  | 2010-E04-032 | Other | 79 | <=4 | >16 | <=1 | <=1 | <=2 | <=0.06 |
| VII  | 2010-E04-037 | Blood | 70 | <=4 | >16 | <=2 | <=1 | 8   | <=0.06 |
| VII  | 2010-E04-041 | Blood | 74 | <=4 | >16 | <=2 | <=1 | 4   | <=0.06 |
| VII  | 2010-E04-044 | Blood | 77 | <=4 | 4   | <=2 | <=1 | 4   | <=0.06 |
| VIII | 2012-S01-001 | Urine | 69 | <=4 | >16 | 4   | <=1 | >16 | >2     |
| VIII | 2012-S01-002 | Urine | 51 | 8   | >16 | >16 | >16 | >16 | >2     |
| VIII | 2012-S01-003 | Urine | 62 | <=4 | >16 | >16 | 16  | >16 | <=0.06 |
| VIII | 2012-S01-004 | Urine | 84 | 8   | >16 | <=1 | <=1 | 4   | >2     |
| VIII | 2012-S01-005 | Urine | 50 | <=4 | >16 | <=1 | <=1 | <=2 | <=0.06 |
| VIII | 2012-S01-007 | Urine | 76 | <=4 | >16 | <=1 | <=1 | <=2 | <=0.06 |
| VIII | 2012-S01-009 | Urine | 23 | <=4 | >16 | <=1 | <=1 | <=2 | <=0.06 |
| VIII | 2012-S01-011 | Urine | 56 | <=4 | <=2 | <=1 | <=1 | <=2 | <=0.06 |
| VIII | 2012-S01-012 | Urine | 52 | <=4 | <=2 | <=1 | <=1 | <=2 | <=0.06 |
| VIII | 2012-S01-014 | Urine | 76 | <=4 | >16 | <=1 | <=1 | 16  | <=0.06 |
| VIII | 2012-S01-015 | Urine | 39 | <=4 | <=2 | <=1 | <=1 | <=2 | <=0.06 |
| VIII | 2012-S01-017 | Urine | 21 | <=4 | >16 | <=1 | <=1 | 4   | <=0.06 |
| VIII | 2012-S01-019 | Urine | 69 | <=4 | >16 | 16  | 16  | >16 | >2     |
| VIII | 2012-S01-022 | Urine | 76 | <=4 | >16 | <=1 | <=1 | <=2 | <=0.06 |
| VIII | 2012-S01-024 | Other | 60 | <=4 | <=2 | <=1 | <=1 | <=2 | <=0.06 |
| VIII | 2012-S01-027 | Urine | 39 | <=4 | <=2 | <=1 | <=1 | <=2 | <=0.06 |
| VIII | 2012-S01-028 | Urine | 50 | <=4 | >16 | <=1 | <=1 | 4   | >2     |
| VIII | 2012-S01-029 | Urine | 75 | <=4 | <=2 | <=1 | <=1 | <=2 | <=0.06 |
| VIII | 2012-S01-030 | Urine | 23 | <=4 | >16 | <=1 | <=1 | <=2 | <=0.06 |
| VIII | 2012-S01-031 | Urine | 47 | <=4 | >16 | >16 | >16 | >16 | 0.12   |
| VIII | 2012-S01-032 | Urine | 82 | <=4 | <=2 | <=1 | <=1 | <=2 | <=0.06 |
| VIII | 2012-S01-034 | Urine | 0  | <=4 | >16 | 4   | <=1 | >16 | >2     |
| VIII | 2012-S01-035 | Urine | 64 | <=4 | <=2 | <=1 | <=1 | <=2 | <=0.06 |
| VIII | 2012-S01-038 | Urine | 70 | <=4 | 4   | <=1 | <=1 | <=2 | <=0.06 |
| VIII | 2012-S01-041 | Urine | 27 | <=4 | >16 | <=1 | <=1 | <=2 | <=0.06 |
| VIII | 2012-S01-042 | Urine | 63 | <=4 | >16 | <=1 | <=1 | 4   | 0.25   |
| VIII | 2012-S01-043 | Urine | 64 | 8   | >16 | <=1 | <=1 | 4   | 0.12   |
| VIII | 2012-S01-046 | Urine | 38 | <=4 | >16 | >16 | 16  | >16 | >2     |
| VIII | 2012-S01-050 | Urine | 86 | <=4 | >16 | 8   | <=1 | >16 | >2     |
| VIII | 2012-S01-200 | Urine | 0  | <=4 | >16 | 4   | <=1 | >16 | >2     |
| VIII | 2012-S01-208 | Blood | 69 | <=4 | >16 | <=1 | <=1 | 4   | 1      |
| VIII | 2012-S01-214 | Blood | 75 | <=4 | >16 | <=1 | <=1 | 4   | <=0.06 |
| VIII | 2012-S01-232 | Blood | 62 | <=4 | 8   | <=1 | <=1 | 4   | <=0.06 |
| VIII | 2012-S01-233 | Blood | 71 | <=4 | <=2 | <=1 | <=1 | <=2 | <=0.06 |
| VIII | 2012-S01-236 | Blood | 24 | <=4 | >16 | <=1 | <=1 | 4   | 0.5    |
| VIII | 2012-S01-238 | Blood | 86 | <=4 | >16 | 16  | 16  | >16 | >2     |
| VIII | 2012-S01-240 | Blood | 62 | <=4 | >16 | 4   | 2   | >16 | <=0.06 |
| VIII | 2012-C01-001 | Urine | 81 | <=4 | >16 | 16  | >16 | >16 | 2      |
| VIII | 2012-C01-002 | Urine | 63 | <=4 | >16 | 8   | 2   | >16 | >2     |
| VIII | 2012-C01-003 | Urine | 66 | <=4 | >16 | 8   | 4   | >16 | >2     |
| VIII | 2012-C01-011 | Other | 70 | <=4 | >16 | >16 | >16 | >16 | >2     |

|      |              |       |    |     |     |     |     |     |        |
|------|--------------|-------|----|-----|-----|-----|-----|-----|--------|
| VIII | 2012-C01-012 | Urine | 51 | <=4 | >16 | 4   | <=1 | >16 | >2     |
| VIII | 2012-C01-013 | Urine | 84 | <=4 | >16 | 8   | <=1 | >16 | <=0.06 |
| VIII | 2012-C01-015 | Urine | 77 | <=4 | >16 | >16 | 16  | >16 | >2     |
| VIII | 2012-C01-016 | Urine | 81 | <=4 | >16 | 4   | <=1 | >16 | >2     |
| VIII | 2012-C01-017 | Urine | 83 | <=4 | >16 | >16 | 16  | >16 | >2     |
| VIII | 2012-C01-018 | Urine | 29 | <=4 | >16 | >16 | >16 | >16 | >2     |
| VIII | 2012-C01-019 | Urine | 22 | <=4 | >16 | >16 | >16 | >16 | >2     |
| VIII | 2012-C01-020 | Urine | 31 | <=4 | >16 | 8   | 8   | >16 | >2     |
| VIII | 2012-C01-021 | Urine | 1  | <=4 | >16 | <=1 | <=1 | >16 | 1      |
| VIII | 2012-C01-023 | Urine | 75 | <=4 | >16 | >16 | 16  | >16 | >2     |
| VIII | 2012-C01-024 | Urine | 89 | >32 | >16 | >16 | >16 | >16 | >2     |
| VIII | 2012-C01-025 | Blood | 49 | <=4 | >16 | 16  | 2   | >16 | >2     |
| VIII | 2012-C01-026 | Urine | 60 | <=4 | >16 | 2   | 2   | >16 | >2     |
| VIII | 2012-C01-027 | Urine | 40 | <=4 | >16 | 8   | 2   | >16 | >2     |
| VIII | 2012-C01-028 | Urine | 32 | 8   | >16 | 8   | <=1 | >16 | >2     |
| VIII | 2012-C01-029 | Urine | 0  | <=4 | >16 | >16 | 16  | >16 | >2     |
| VIII | 2012-C01-042 | Urine | 61 | 32  | >16 | 16  | 4   | >16 | >2     |
| VIII | 2012-C01-043 | Urine | 61 | <=4 | >16 | 16  | 2   | >16 | >2     |
| VIII | 2012-C01-044 | Urine | 85 | 16  | >16 | >16 | 4   | >16 | >2     |
| VIII | 2012-C01-046 | Urine | 52 | <=4 | >16 | >16 | 8   | >16 | <=0.06 |
| VIII | 2012-C01-047 | Other | 82 | <=4 | >16 | 8   | 4   | >16 | >2     |
| VIII | 2012-C02-004 | Other | 35 | <=4 | >16 | <=1 | <=1 | 8   | <=0.06 |
| VIII | 2012-C02-009 | Urine | 84 | <=4 | >16 | 8   | 8   | >16 | <=0.06 |
| VIII | 2012-C02-010 | Urine | 61 | <=4 | >16 | <=1 | <=1 | 4   | <=0.06 |
| VIII | 2012-C02-011 | Urine | 24 | <=4 | >16 | <=1 | <=1 | 4   | 0.25   |
| VIII | 2012-C02-020 | Urine | 69 | <=4 | >16 | >16 | >16 | >16 | >2     |
| VIII | 2012-C02-021 | Urine | 42 | 8   | >16 | <=1 | <=1 | 4   | <=0.06 |
| VIII | 2012-C02-023 | Urine | 54 | <=4 | >16 | <=1 | <=1 | 4   | >2     |
| VIII | 2012-C02-024 | Urine | 57 | <=4 | >16 | <=1 | <=1 | 4   | <=0.06 |
| VIII | 2012-C02-025 | Urine | 59 | <=4 | >16 | <=1 | <=1 | 4   | 0.5    |
| VIII | 2012-C02-034 | Urine | 60 | 8   | >16 | <=1 | <=1 | >16 | 0.25   |
| VIII | 2012-C02-035 | Urine | 54 | <=4 | >16 | <=1 | <=1 | 8   | <=0.06 |
| VIII | 2012-C02-036 | Urine | 22 | 8   | >16 | <=1 | <=1 | 16  | <=0.06 |
| VIII | 2012-C02-038 | Urine | 38 | <=4 | 4   | <=1 | <=1 | <=2 | <=0.06 |
| VIII | 2012-C02-040 | Urine | 56 | <=4 | <=2 | <=1 | <=1 | <=2 | 0.12   |
| VIII | 2012-C02-041 | Blood | 70 | <=4 | 4   | <=1 | <=1 | <=2 | <=0.06 |
| VIII | 2012-C02-043 | Urine | 87 | <=4 | >16 | >16 | 16  | >16 | >2     |
| VIII | 2012-C02-044 | Urine | 59 | <=4 | >16 | >16 | 16  | >16 | <=0.06 |
| VIII | 2012-C02-047 | Urine | 29 | <=4 | 4   | <=1 | <=1 | <=2 | <=0.06 |
| VIII | 2012-C02-183 | Urine | 13 | <=4 | >16 | <=1 | <=1 | >16 | 0.25   |
| VIII | 2012-C02-213 | Blood | 43 | <=4 | <=2 | <=1 | <=1 | <=2 | 0.12   |
| VIII | 2012-C02-214 | Blood | 86 | <=4 | 4   | <=1 | <=1 | <=2 | <=0.06 |
| VIII | 2012-C02-238 | Blood | 69 | <=4 | <=2 | <=1 | <=1 | <=2 | <=0.06 |
| VIII | 2012-C11-001 | Urine | 83 | <=4 | >16 | <=1 | <=1 | 8   | 0.25   |
| VIII | 2012-C11-004 | Urine | 37 | <=4 | >16 | <=1 | <=1 | 8   | 0.25   |
| VIII | 2012-C11-005 | Other | 41 | <=4 | >16 | <=1 | <=1 | 4   | 0.25   |
| VIII | 2012-C11-007 | Urine | 17 | <=4 | >16 | <=1 | <=1 | <=2 | 0.12   |
| VIII | 2012-C11-013 | Urine | 83 | <=4 | >16 | >16 | >16 | >16 | 2      |
| VIII | 2012-C11-014 | Urine | 36 | <=4 | >16 | <=1 | <=1 | 4   | <=0.06 |
| VIII | 2012-C11-015 | Blood | 80 | <=4 | >16 | <=1 | <=1 | 8   | <=0.06 |
| VIII | 2012-C11-016 | Urine | 49 | <=4 | >16 | <=1 | <=1 | 16  | <=0.06 |
| VIII | 2012-C11-017 | Urine | 64 | <=4 | >16 | <=1 | <=1 | 4   | <=0.06 |
| VIII | 2012-C11-023 | Urine | 25 | <=4 | >16 | <=1 | <=1 | 8   | <=0.06 |
| VIII | 2012-C11-027 | Urine | 37 | <=4 | >16 | <=1 | <=1 | 4   | <=0.06 |
| VIII | 2012-C11-028 | Urine | 74 | <=4 | >16 | <=1 | <=1 | <=2 | <=0.06 |
| VIII | 2012-C11-029 | Blood | 29 | <=4 | >16 | <=1 | <=1 | 4   | 0.25   |
| VIII | 2012-C11-031 | Blood | 30 | <=4 | >16 | <=1 | <=1 | <=2 | <=0.06 |
| VIII | 2012-C11-033 | Blood | 77 | <=4 | >16 | >16 | >16 | >16 | >2     |
| VIII | 2012-C11-036 | Urine | 39 | <=4 | >16 | <=1 | <=1 | 4   | <=0.06 |
| VIII | 2012-C11-042 | Urine | 40 | <=4 | >16 | <=1 | <=1 | 4   | <=0.06 |
| VIII | 2012-C11-046 | Urine | 38 | <=4 | >16 | <=1 | <=1 | <=2 | <=0.06 |

|      |              |       |     |     |     |     |     |     |        |
|------|--------------|-------|-----|-----|-----|-----|-----|-----|--------|
| VIII | 2012-C11-047 | Urine | 0   | <=4 | >16 | <=1 | <=1 | 4   | 0.25   |
| VIII | 2012-C11-201 | Blood | 61  | <=4 | >16 | <=1 | <=1 | 4   | <=0.06 |
| VIII | 2012-C11-203 | Blood | 52  | 8   | <=2 | <=1 | <=1 | <=2 | <=0.06 |
| VIII | 2012-C11-206 | Blood | 90  | <=4 | <=2 | <=1 | <=1 | <=2 | 0.12   |
| VIII | 2012-C11-212 | Blood | 54  | <=4 | 4   | <=1 | <=1 | <=2 | 0.25   |
| VIII | 2012-C11-215 | Blood | 82  | <=4 | >16 | >16 | >16 | >16 | >2     |
| VIII | 2012-C11-231 | Blood | 54  | <=4 | 4   | <=1 | <=1 | <=2 | <=0.06 |
| VIII | 2012-C11-238 | Other | 55  | <=4 | >16 | <=1 | <=1 | 4   | <=0.06 |
| VIII | 2012-C11-245 | Blood | 44  | <=4 | >16 | <=1 | <=1 | <=2 | <=0.06 |
| VIII | 2012-C11-247 | Blood | 84  | <=4 | >16 | <=1 | <=1 | <=2 | <=0.06 |
| VIII | 2012-C04-001 | Blood | 81  | <=4 | >16 | <=1 | <=1 | 8   | <=0.06 |
| VIII | 2012-C04-008 | Urine | 80  | <=4 | >16 | <=1 | <=1 | >16 | 0.5    |
| VIII | 2012-C04-020 | Urine | 55  | <=4 | 4   | <=1 | <=1 | <=2 | <=0.06 |
| VIII | 2012-C04-036 | Urine | 5   | <=4 | >16 | 8   | 16  | >16 | <=0.06 |
| VIII | 2012-C04-037 | Urine | 78  | <=4 | >16 | 4   | 8   | >16 | >2     |
| VIII | 2012-C04-042 | Urine | 82  | <=4 | >16 | <=1 | <=1 | 4   | <=0.06 |
| VIII | 2012-C04-204 | Blood | 37  | <=4 | 4   | <=1 | <=1 | <=2 | <=0.06 |
| VIII | 2012-C04-214 | Blood | 53  | <=4 | >16 | <=1 | <=1 | <=2 | <=0.06 |
| VIII | 2012-C04-215 | Blood | 69  | 8   | >16 | <=1 | <=1 | <=2 | 1      |
| VIII | 2012-C04-216 | Blood | 54  | 8   | >16 | >16 | >16 | >16 | >2     |
| VIII | 2012-C04-233 | Blood | 81  | 8   | >16 | <=1 | <=1 | 8   | >2     |
| VIII | 2012-C04-241 | Blood | 101 | <=4 | >16 | <=1 | <=1 | 4   | >2     |
| VIII | 2012-C04-249 | Blood | 59  | <=4 | >16 | 8   | 16  | >16 | >2     |
| VIII | 2012-S05-003 | Urine | 86  | 8   | 4   | <=1 | <=1 | <=2 | <=0.06 |
| VIII | 2012-S05-006 | Urine | 68  | <=4 | >16 | <=1 | <=1 | 8   | <=0.06 |
| VIII | 2012-S05-008 | Urine | 68  | 8   | >16 | 8   | 16  | >16 | >2     |
| VIII | 2012-S05-009 | Urine | 82  | <=4 | >16 | <=1 | <=1 | 4   | >2     |
| VIII | 2012-S05-010 | Urine | 36  | <=4 | 4   | <=1 | <=1 | <=2 | <=0.06 |
| VIII | 2012-S05-012 | Urine | 78  | <=4 | >16 | 8   | >16 | >16 | >2     |
| VIII | 2012-S05-015 | Urine | 28  | <=4 | >16 | <=1 | <=1 | 4   | <=0.06 |
| VIII | 2012-S05-025 | Urine | 74  | <=4 | >16 | <=1 | <=1 | 8   | 0.25   |
| VIII | 2012-S05-028 | Blood | 75  | <=4 | >16 | <=1 | <=1 | 4   | <=0.06 |
| VIII | 2012-S05-036 | Urine | 52  | <=4 | >16 | 8   | <=1 | >16 | >2     |
| VIII | 2012-S05-043 | Urine | 70  | <=4 | >16 | 4   | 4   | >16 | >2     |
| VIII | 2012-S05-211 | Blood | 82  | <=4 | 4   | <=1 | <=1 | <=2 | >2     |
| VIII | 2012-S05-220 | Blood | 77  | <=4 | >16 | 4   | <=1 | >16 | >2     |
| VIII | 2012-S05-222 | Blood | 59  | <=4 | >16 | <=1 | <=1 | 4   | <=0.06 |
| VIII | 2012-S05-225 | Blood | 74  | <=4 | 4   | <=1 | <=1 | 4   | 0.5    |
| VIII | 2012-S05-229 | Blood | 80  | <=4 | 4   | <=1 | <=1 | 4   | <=0.06 |
| VIII | 2012-S05-231 | Blood | 93  | <=4 | >16 | >16 | 16  | >16 | >2     |
| VIII | 2012-S05-233 | Blood | 79  | <=4 | >16 | <=1 | <=1 | 8   | <=0.06 |
| VIII | 2012-S05-234 | Blood | 61  | <=4 | 4   | <=1 | <=1 | <=2 | <=0.06 |
| VIII | 2012-S05-239 | Blood | 72  | <=4 | >16 | <=1 | <=1 | 16  | <=0.06 |
| VIII | 2012-S05-240 | Blood | 76  | <=4 | >16 | <=1 | 4   | >16 | <=0.06 |
| VIII | 2012-S05-246 | Blood | 86  | <=4 | >16 | <=1 | <=1 | 8   | >2     |
| VIII | 2012-S05-250 | Blood | 78  | <=4 | >16 | <=1 | <=1 | 4   | <=0.06 |
| VIII | 2012-S06-002 | Urine | 60  | <=4 | >16 | <=1 | <=1 | 4   | >2     |
| VIII | 2012-S06-004 | Urine | 55  | <=4 | >16 | <=1 | <=1 | 4   | <=0.06 |
| VIII | 2012-S06-005 | Urine | 51  | <=4 | >16 | >16 | 4   | >16 | >2     |
| VIII | 2012-S06-006 | Urine | 75  | <=4 | >16 | >16 | >16 | >16 | >2     |
| VIII | 2012-S06-008 | Urine | 64  | <=4 | >16 | <=1 | <=1 | <=2 | <=0.06 |
| VIII | 2012-S06-010 | Urine | 68  | <=4 | 8   | <=1 | <=1 | 4   | <=0.06 |
| VIII | 2012-S06-015 | Urine | 73  | <=4 | >16 | <=1 | <=1 | 4   | 0.5    |
| VIII | 2012-S06-017 | Urine | 77  | 8   | >16 | 16  | >16 | >16 | >2     |
| VIII | 2012-S06-018 | Urine | 62  | 8   | 4   | <=1 | <=1 | 4   | <=0.06 |
| VIII | 2012-S06-019 | Urine | 31  | <=4 | <=2 | <=1 | <=1 | <=2 | <=0.06 |
| VIII | 2012-S06-022 | Urine | 57  | <=4 | >16 | <=1 | <=1 | 8   | <=0.06 |
| VIII | 2012-S06-024 | Urine | 23  | <=4 | 4   | <=1 | <=1 | <=2 | <=0.06 |
| VIII | 2012-S06-025 | Urine | 84  | 8   | >16 | <=1 | <=1 | >16 | 2      |
| VIII | 2012-S06-028 | Urine | 46  | <=4 | >16 | <=1 | <=1 | 8   | <=0.06 |
| VIII | 2012-S06-030 | Urine | 65  | <=4 | 4   | <=1 | <=1 | <=2 | <=0.06 |

|      |              |       |    |     |     |     |     |     |        |
|------|--------------|-------|----|-----|-----|-----|-----|-----|--------|
| VIII | 2012-S06-032 | Urine | 63 | <=4 | >16 | <=1 | <=1 | 16  | <=0.06 |
| VIII | 2012-S06-033 | Urine | 5  | <=4 | >16 | <=1 | <=1 | 4   | <=0.06 |
| VIII | 2012-S06-035 | Urine | 77 | <=4 | >16 | <=1 | <=1 | 8   | 0.5    |
| VIII | 2012-S06-036 | Urine | 81 | <=4 | >16 | >16 | >16 | >16 | >2     |
| VIII | 2012-S06-037 | Urine | 62 | 8   | >16 | <=1 | <=1 | 4   | <=0.06 |
| VIII | 2012-S06-043 | Blood | 73 | <=4 | >16 | <=1 | <=1 | >16 | >2     |
| VIII | 2012-S06-046 | Urine | 70 | <=4 | >16 | <=1 | <=1 | 8   | <=0.06 |
| VIII | 2012-S06-205 | Blood | 65 | <=4 | 4   | <=1 | <=1 | <=2 | <=0.06 |
| VIII | 2012-S06-206 | Blood | 63 | <=4 | >16 | 2   | <=1 | >16 | 0.25   |
| VIII | 2012-S06-207 | Blood | 83 | <=4 | <=2 | <=1 | <=1 | <=2 | <=0.06 |
| VIII | 2012-S06-211 | Blood | 88 | <=4 | >16 | <=1 | <=1 | 4   | 2      |
| VIII | 2012-S06-220 | Blood | 61 | <=4 | >16 | <=1 | <=1 | 16  | 0.25   |
| VIII | 2012-S06-222 | Blood | 38 | <=4 | >16 | <=1 | <=1 | 16  | <=0.06 |
| VIII | 2012-S06-223 | Blood | 74 | <=4 | >16 | <=1 | <=1 | <=2 | 0.5    |
| VIII | 2012-S06-246 | Blood | 84 | <=4 | >16 | <=1 | <=1 | 8   | >2     |
| VIII | 2012-S07-002 | Blood | 69 | 8   | >16 | <=1 | <=1 | 4   | <=0.06 |
| VIII | 2012-S07-007 | Blood | 80 | <=4 | >16 | <=1 | <=1 | 4   | 0.25   |
| VIII | 2012-S07-008 | Blood | 50 | <=4 | <=2 | <=1 | <=1 | <=2 | <=0.06 |
| VIII | 2012-S07-011 | Urine | 78 | <=4 | 4   | <=1 | <=1 | 4   | 0.25   |
| VIII | 2012-S07-012 | Urine | 24 | <=4 | >16 | 8   | 16  | >16 | >2     |
| VIII | 2012-S07-013 | Urine | 94 | <=4 | >16 | 16  | >16 | >16 | >2     |
| VIII | 2012-S07-014 | Other | 46 | <=4 | <=2 | <=1 | <=1 | 4   | <=0.06 |
| VIII | 2012-S07-018 | Urine | 3  | <=4 | >16 | <=1 | <=1 | 4   | >2     |
| VIII | 2012-S07-023 | Urine | 54 | <=4 | <=2 | <=1 | <=1 | <=2 | <=0.06 |
| VIII | 2012-S07-027 | Other | 81 | <=4 | 4   | <=1 | <=1 | <=2 | <=0.06 |
| VIII | 2012-S07-034 | Urine | 98 | <=4 | >16 | <=1 | <=1 | >16 | >2     |
| VIII | 2012-S07-040 | Urine | 82 | 8   | >16 | <=1 | <=1 | 16  | >2     |
| VIII | 2012-S07-049 | Other | 72 | <=4 | >16 | <=1 | <=1 | <=2 | <=0.06 |
| VIII | 2012-S07-212 | Blood | 57 | <=4 | <=2 | <=1 | <=1 | <=2 | >2     |
| VIII | 2012-S07-215 | Blood | 60 | <=4 | >16 | <=1 | <=1 | <=2 | <=0.06 |
| VIII | 2012-S07-216 | Blood | 73 | <=4 | >16 | <=1 | <=1 | 4   | <=0.06 |
| VIII | 2012-S07-223 | Blood | 73 | <=4 | >16 | <=1 | <=1 | 4   | 0.25   |
| VIII | 2012-S07-228 | Blood | 58 | <=4 | >16 | 16  | 8   | >16 | >2     |
| VIII | 2012-S07-229 | Blood | 36 | <=4 | >16 | <=1 | <=1 | 4   | 0.5    |
| VIII | 2012-S07-230 | Blood | 53 | <=4 | 4   | <=1 | <=1 | <=2 | <=0.06 |
| VIII | 2012-S07-231 | Blood | 83 | <=4 | 4   | <=1 | <=1 | 4   | <=0.06 |
| VIII | 2012-S07-241 | Blood | 81 | <=4 | >16 | <=1 | <=1 | <=2 | <=0.06 |
| VIII | 2012-S07-243 | Blood | 60 | <=4 | >16 | 4   | 16  | >16 | <=0.06 |
| VIII | 2012-N05-001 | Urine | 22 | <=4 | >16 | <=1 | <=1 | 16  | 0.12   |
| VIII | 2012-N05-002 | Urine | 51 | <=4 | >16 | <=1 | <=1 | >16 | <=0.06 |
| VIII | 2012-N05-003 | Urine | 78 | <=4 | >16 | <=1 | <=1 | 4   | 0.25   |
| VIII | 2012-N05-007 | Urine | 29 | <=4 | 16  | <=1 | <=1 | <=2 | 0.5    |
| VIII | 2012-N05-009 | Urine | 45 | <=4 | >16 | <=1 | <=1 | 4   | <=0.06 |
| VIII | 2012-N05-017 | Urine | 39 | <=4 | >16 | <=1 | <=1 | 4   | <=0.06 |
| VIII | 2012-N05-019 | Urine | 23 | <=4 | 4   | <=1 | <=1 | <=2 | <=0.06 |
| VIII | 2012-N05-022 | Urine | 55 | <=4 | <=2 | <=1 | <=1 | <=2 | <=0.06 |
| VIII | 2012-N05-023 | Urine | 81 | <=4 | >16 | <=1 | <=1 | <=2 | >2     |
| VIII | 2012-N05-025 | Urine | 51 | <=4 | >16 | <=1 | <=1 | 16  | <=0.06 |
| VIII | 2012-N05-028 | Urine | 61 | <=4 | >16 | 2   | <=1 | 4   | <=0.06 |
| VIII | 2012-N05-032 | Urine | 14 | <=4 | <=2 | <=1 | <=1 | <=2 | <=0.06 |
| VIII | 2012-N05-033 | Urine | 83 | <=4 | 4   | <=1 | <=1 | <=2 | <=0.06 |
| VIII | 2012-N05-034 | Urine | 53 | <=4 | <=2 | <=1 | <=1 | <=2 | >2     |
| VIII | 2012-N05-035 | Urine | 57 | <=4 | >16 | <=1 | <=1 | 4   | 1      |
| VIII | 2012-N05-036 | Urine | 76 | <=4 | >16 | <=1 | <=1 | <=2 | <=0.06 |
| VIII | 2012-N05-037 | Urine | 40 | <=4 | >16 | <=1 | <=1 | 4   | <=0.06 |
| VIII | 2012-N05-038 | Urine | 54 | <=4 | >16 | <=1 | <=1 | 4   | <=0.06 |
| VIII | 2012-N05-040 | Urine | 32 | <=4 | 4   | <=1 | <=1 | <=2 | <=0.06 |
| VIII | 2012-N05-041 | Urine | 24 | <=4 | >16 | <=1 | <=1 | >16 | 1      |
| VIII | 2012-N05-042 | Urine | 36 | <=4 | >16 | <=1 | <=1 | 4   | <=0.06 |
| VIII | 2012-N05-043 | Urine | 64 | <=4 | <=2 | <=1 | <=1 | <=2 | <=0.06 |
| VIII | 2012-N05-044 | Other | 68 | <=4 | >16 | <=1 | <=1 | >16 | >2     |



|      |              |       |    |     |     |     |     |     |        |
|------|--------------|-------|----|-----|-----|-----|-----|-----|--------|
| VIII | 2012-N05-047 | Urine | 27 | <=4 | >16 | <=1 | <=1 | 8   | <=0.06 |
| VIII | 2012-N05-048 | Urine | 24 | <=4 | >16 | <=1 | <=1 | 4   | 0.25   |
| VIII | 2012-N05-195 | Urine | 12 | <=4 | >16 | <=1 | <=1 | <=2 | 0.12   |
| VIII | 2012-N05-207 | Blood | 93 | <=4 | <=2 | <=1 | <=1 | <=2 | <=0.06 |
| VIII | 2012-N05-223 | Blood | 93 | <=4 | >16 | <=1 | <=1 | 4   | <=0.06 |
| VIII | 2012-N05-224 | Blood | 49 | <=4 | 4   | <=1 | <=1 | <=2 | <=0.06 |
| VIII | 2012-N05-238 | Blood | 62 | <=4 | <=2 | <=1 | <=1 | <=2 | <=0.06 |
| VIII | 2012-N05-244 | Blood | 3  | <=4 | >16 | <=1 | <=1 | 4   | >2     |
| VIII | 2012-N05-251 | Urine | 28 | <=4 | >16 | <=1 | <=1 | <=2 | <=0.06 |
| VIII | 2012-N05-280 | Urine | 49 | <=4 | <=2 | <=1 | <=1 | <=2 | 0.25   |
| VIII | 2012-N06-002 | Other | 59 | <=4 | >16 | 8   | 4   | >16 | >2     |
| VIII | 2012-N06-003 | Urine | 38 | <=4 | >16 | <=1 | <=1 | <=2 | <=0.06 |
| VIII | 2012-N06-004 | Urine | 28 | <=4 | >16 | <=1 | <=1 | 16  | <=0.06 |
| VIII | 2012-N06-005 | Urine | 79 | <=4 | >16 | <=1 | <=1 | 8   | 0.25   |
| VIII | 2012-N06-007 | Urine | 78 | <=4 | >16 | <=1 | <=1 | 4   | 0.25   |
| VIII | 2012-N06-011 | Urine | 72 | <=4 | >16 | <=1 | <=1 | 8   | >2     |
| VIII | 2012-N06-013 | Urine | 81 | <=4 | >16 | <=1 | <=1 | >16 | 0.25   |
| VIII | 2012-N06-017 | Urine | 82 | <=4 | >16 | <=1 | <=1 | 4   | 0.25   |
| VIII | 2012-N06-020 | Urine | 42 | <=4 | >16 | <=1 | <=1 | <=2 | <=0.06 |
| VIII | 2012-N06-021 | Urine | 75 | <=4 | >16 | >16 | 4   | >16 | >2     |
| VIII | 2012-N06-024 | Urine | 82 | <=4 | 4   | <=1 | <=1 | <=2 | 0.25   |
| VIII | 2012-N06-025 | Urine | 84 | <=4 | >16 | 8   | 16  | >16 | >2     |
| VIII | 2012-N06-027 | Urine | 28 | <=4 | 4   | <=1 | <=1 | <=2 | <=0.06 |
| VIII | 2012-N06-028 | Urine | 45 | <=4 | >16 | <=1 | <=1 | 4   | <=0.06 |
| VIII | 2012-N06-030 | Urine | 1  | <=4 | >16 | <=1 | <=1 | 8   | <=0.06 |
| VIII | 2012-N06-031 | Urine | 81 | <=4 | 4   | <=1 | <=1 | <=2 | <=0.06 |
| VIII | 2012-N06-035 | Urine | 61 | <=4 | >16 | 2   | 8   | >16 | >2     |
| VIII | 2012-N06-036 | Urine | 86 | <=4 | 4   | <=1 | <=1 | <=2 | <=0.06 |
| VIII | 2012-N06-039 | Urine | 52 | <=4 | 4   | <=1 | <=1 | <=2 | <=0.06 |
| VIII | 2012-N06-040 | Urine | 38 | <=4 | 4   | <=1 | <=1 | <=2 | <=0.06 |
| VIII | 2012-N06-041 | Urine | 89 | <=4 | >16 | <=1 | <=1 | <=2 | <=0.06 |
| VIII | 2012-N06-044 | Urine | 65 | <=4 | >16 | <=1 | <=1 | 4   | <=0.06 |
| VIII | 2012-N06-045 | Urine | 78 | <=4 | >16 | 16  | 4   | >16 | 1      |
| VIII | 2012-N06-047 | Urine | 27 | <=4 | 4   | <=1 | <=1 | <=2 | <=0.06 |
| VIII | 2012-N06-050 | Urine | 36 | <=4 | <=2 | <=1 | <=1 | <=2 | <=0.06 |
| VIII | 2012-N06-205 | Blood | 93 | <=4 | >16 | >16 | >16 | >16 | >2     |
| VIII | 2012-N06-206 | Blood | 75 | <=4 | <=2 | <=1 | <=1 | <=2 | <=0.06 |
| VIII | 2012-N06-212 | Blood | 54 | <=4 | >16 | <=1 | <=1 | 4   | 0.25   |
| VIII | 2012-N06-216 | Blood | 82 | 8   | <=2 | <=1 | <=1 | <=2 | 0.25   |
| VIII | 2012-N06-218 | Blood | 68 | <=4 | >16 | <=1 | <=1 | <=2 | 0.12   |
| VIII | 2012-N06-223 | Blood | 77 | <=4 | >16 | 2   | <=1 | >16 | 0.12   |
| VIII | 2012-N06-229 | Blood | 79 | <=4 | >16 | <=1 | <=1 | 4   | 0.25   |
| VIII | 2012-N06-230 | Blood | 63 | <=4 | >16 | >16 | >16 | >16 | >2     |
| VIII | 2012-N06-250 | Blood | 69 | <=4 | 4   | <=1 | <=1 | 4   | 0.25   |
| VIII | 2012-N07-002 | Blood | 80 | <=4 | >16 | <=1 | <=1 | 8   | <=0.06 |
| VIII | 2012-N07-003 | Urine | 36 | <=4 | >16 | >16 | >16 | >16 | <=0.06 |
| VIII | 2012-N07-004 | Urine | 88 | <=4 | <=2 | <=1 | <=1 | <=2 | <=0.06 |
| VIII | 2012-N07-006 | Urine | 46 | <=4 | >16 | <=1 | <=1 | 4   | 2      |
| VIII | 2012-N07-007 | Urine | 89 | <=4 | >16 | <=1 | <=1 | 4   | 0.12   |
| VIII | 2012-N07-010 | Urine | 29 | <=4 | >16 | <=1 | <=1 | 4   | <=0.06 |
| VIII | 2012-N07-016 | Blood | 45 | <=4 | >16 | <=1 | <=1 | <=2 | <=0.06 |
| VIII | 2012-N07-017 | Blood | 69 | <=4 | >16 | <=1 | <=1 | 4   | <=0.06 |
| VIII | 2012-N07-021 | Urine | 45 | <=4 | <=2 | <=1 | <=1 | <=2 | <=0.06 |
| VIII | 2012-N07-024 | Urine | 57 | <=4 | >16 | <=1 | <=1 | 8   | <=0.06 |
| VIII | 2012-N07-030 | Urine | 45 | <=4 | <=2 | <=1 | <=1 | <=2 | <=0.06 |
| VIII | 2012-N07-031 | Urine | 72 | <=4 | >16 | 8   | 16  | >16 | <=0.06 |
| VIII | 2012-N07-035 | Blood | 84 | <=4 | >16 | <=1 | <=1 | 4   | 0.12   |
| VIII | 2012-N07-037 | Urine | 56 | 8   | <=2 | <=1 | <=1 | <=2 | <=0.06 |
| VIII | 2012-N07-039 | Blood | 86 | <=4 | 4   | <=1 | <=1 | <=2 | <=0.06 |
| VIII | 2012-N07-040 | Other | 44 | <=4 | >16 | 8   | 16  | >16 | >2     |
| VIII | 2012-N07-043 | Urine | 81 | 8   | <=2 | <=1 | <=1 | <=2 | <=0.06 |

|      |              |       |    |     |     |     |     |     |        |
|------|--------------|-------|----|-----|-----|-----|-----|-----|--------|
| VIII | 2012-N07-044 | Urine | 65 | <=4 | >16 | >16 | >16 | >16 | <=0.06 |
| VIII | 2012-N07-045 | Urine | 78 | <=4 | >16 | >16 | 4   | >16 | >2     |
| VIII | 2012-N07-046 | Blood | 19 | <=4 | <=2 | <=1 | <=1 | <=2 | <=0.06 |
| VIII | 2012-N07-047 | Urine | 29 | <=4 | >16 | 8   | 8   | >16 | <=0.06 |
| VIII | 2012-N07-048 | Urine | 19 | <=4 | <=2 | <=1 | <=1 | <=2 | <=0.06 |
| VIII | 2012-N07-049 | Urine | 33 | <=4 | >16 | <=1 | <=1 | 4   | <=0.06 |
| VIII | 2012-N07-050 | Urine | 68 | <=4 | <=2 | <=1 | <=1 | 4   | <=0.06 |
| VIII | 2012-N07-191 | Urine | 0  | <=4 | >16 | <=1 | <=1 | <=2 | <=0.06 |
| VIII | 2012-N07-195 | Urine | 4  | <=4 | >16 | <=1 | <=1 | 4   | <=0.06 |
| VIII | 2012-N07-196 | Urine | 7  | <=4 | 4   | <=1 | <=1 | <=2 | <=0.06 |
| VIII | 2012-N07-198 | Urine | 16 | <=4 | <=2 | <=1 | <=1 | <=2 | <=0.06 |
| VIII | 2012-N07-218 | Blood | 67 | <=4 | 4   | <=1 | <=1 | <=2 | <=0.06 |
| VIII | 2012-N07-222 | Blood | 79 | 8   | >16 | <=1 | <=1 | <=2 | <=0.06 |
| VIII | 2012-N07-226 | Blood | 31 | <=4 | >16 | <=1 | <=1 | 16  | <=0.06 |
| VIII | 2012-N07-228 | Blood | 76 | <=4 | >16 | <=1 | <=1 | 4   | 0.12   |
| VIII | 2012-N07-230 | Blood | 48 | 8   | <=2 | <=1 | <=1 | <=2 | <=0.06 |
| VIII | 2012-N07-233 | Blood | 58 | <=4 | 4   | <=1 | <=1 | 4   | 0.25   |
| VIII | 2012-N07-234 | Blood | 72 | 8   | >16 | <=1 | <=1 | <=2 | 0.25   |
| VIII | 2012-N07-235 | Blood | 36 | 8   | <=2 | <=1 | <=1 | <=2 | 0.25   |
| VIII | 2012-N07-241 | Blood | 70 | <=4 | >16 | >16 | >16 | >16 | >2     |
| VIII | 2012-N07-242 | Blood | 88 | <=4 | >16 | >16 | >16 | >16 | >2     |
| VIII | 2012-N07-247 | Blood | 51 | <=4 | >16 | <=1 | <=1 | <=2 | <=0.06 |
| VIII | 2012-N07-249 | Blood | 82 | <=4 | >16 | <=1 | <=1 | <=2 | <=0.06 |
| VIII | 2012-S08-001 | Urine | 27 | <=4 | >16 | <=1 | <=1 | 8   | <=0.06 |
| VIII | 2012-S08-002 | Urine | 78 | 16  | >16 | >16 | >16 | >16 | >2     |
| VIII | 2012-S08-007 | Urine | 66 | 8   | >16 | <=1 | <=1 | 8   | 0.25   |
| VIII | 2012-S08-008 | Urine | 60 | <=4 | >16 | <=1 | <=1 | 4   | >2     |
| VIII | 2012-S08-009 | Urine | 70 | <=4 | >16 | <=1 | <=1 | 8   | <=0.06 |
| VIII | 2012-S08-010 | Blood | 78 | <=4 | >16 | <=1 | <=1 | 4   | <=0.06 |
| VIII | 2012-S08-013 | Urine | 84 | <=4 | >16 | <=1 | <=1 | 4   | <=0.06 |
| VIII | 2012-S08-014 | Urine | 85 | <=4 | >16 | <=1 | <=1 | 8   | >2     |
| VIII | 2012-S08-016 | Urine | 87 | <=4 | >16 | 8   | 4   | >16 | >2     |
| VIII | 2012-S08-020 | Urine | 57 | <=4 | >16 | <=1 | <=1 | 4   | 1      |
| VIII | 2012-S08-021 | Urine | 51 | <=4 | <=2 | <=1 | <=1 | <=2 | <=0.06 |
| VIII | 2012-S08-023 | Urine | 30 | <=4 | <=2 | <=1 | <=1 | <=2 | <=0.06 |
| VIII | 2012-S08-025 | Urine | 54 | 8   | >16 | >16 | >16 | >16 | >2     |
| VIII | 2012-S08-026 | Urine | 66 | <=4 | 4   | <=1 | <=1 | <=2 | <=0.06 |
| VIII | 2012-S08-028 | Urine | 87 | <=4 | >16 | <=1 | <=1 | <=2 | <=0.06 |
| VIII | 2012-S08-029 | Urine | 69 | <=4 | >16 | <=1 | <=1 | 4   | <=0.06 |
| VIII | 2012-S08-031 | Urine | 47 | <=4 | >16 | <=1 | <=1 | <=2 | <=0.06 |
| VIII | 2012-S08-032 | Urine | 87 | <=4 | >16 | <=1 | <=1 | 8   | <=0.06 |
| VIII | 2012-S08-033 | Urine | 84 | <=4 | >16 | <=1 | <=1 | 16  | >2     |
| VIII | 2012-S08-034 | Urine | 91 | <=4 | >16 | <=1 | <=1 | >16 | <=0.06 |
| VIII | 2012-S08-035 | Urine | 21 | <=4 | >16 | <=1 | <=1 | 4   | <=0.06 |
| VIII | 2012-S08-036 | Urine | 51 | 8   | >16 | 16  | >16 | >16 | >2     |
| VIII | 2012-S08-037 | Urine | 28 | <=4 | >16 | <=1 | <=1 | 4   | 0.12   |
| VIII | 2012-S08-042 | Urine | 58 | 16  | >16 | 8   | 16  | >16 | >2     |
| VIII | 2012-S08-043 | Urine | 23 | <=4 | >16 | <=1 | <=1 | 4   | 0.12   |
| VIII | 2012-S08-049 | Urine | 27 | <=4 | >16 | <=1 | <=1 | <=2 | 0.12   |
| VIII | 2012-E02-004 | Blood | 61 | <=4 | <=2 | <=1 | <=1 | <=2 | <=0.06 |
| VIII | 2012-E02-005 | Urine | 82 | <=4 | >16 | <=1 | <=1 | 8   | <=0.06 |
| VIII | 2012-E02-007 | Urine | 46 | <=4 | 4   | <=1 | <=1 | <=2 | <=0.06 |
| VIII | 2012-E02-008 | Urine | 86 | <=4 | >16 | >16 | 8   | >16 | >2     |
| VIII | 2012-E02-009 | Urine | 82 | <=4 | <=2 | <=1 | <=1 | <=2 | >2     |
| VIII | 2012-E02-010 | Urine | 17 | <=4 | >16 | 8   | 2   | >16 | <=0.06 |
| VIII | 2012-E02-012 | Urine | 51 | <=4 | >16 | >16 | 4   | >16 | >2     |
| VIII | 2012-E02-014 | Urine | 57 | <=4 | <=2 | <=1 | <=1 | <=2 | <=0.06 |
| VIII | 2012-E02-015 | Blood | 70 | <=4 | >16 | <=1 | <=1 | 8   | >2     |
| VIII | 2012-E02-017 | Urine | 73 | <=4 | 4   | <=1 | <=1 | <=2 | <=0.06 |
| VIII | 2012-E02-019 | Urine | 58 | <=4 | >16 | <=1 | <=1 | 4   | 0.25   |
| VIII | 2012-E02-020 | Urine | 75 | <=4 | >16 | <=1 | <=1 | >16 | >2     |

|      |              |       |    |     |     |     |     |     |        |
|------|--------------|-------|----|-----|-----|-----|-----|-----|--------|
| VIII | 2012-E02-024 | Urine | 0  | <=4 | >16 | <=1 | <=1 | <=2 | <=0.06 |
| VIII | 2012-E02-029 | Urine | 79 | <=4 | >16 | <=1 | <=1 | 4   | <=0.06 |
| VIII | 2012-E02-030 | Urine | 81 | <=4 | 4   | <=1 | <=1 | <=2 | 0.25   |
| VIII | 2012-E02-031 | Urine | 72 | <=4 | >16 | <=1 | <=1 | <=2 | <=0.06 |
| VIII | 2012-E02-033 | Urine | 91 | <=4 | >16 | >16 | 16  | >16 | 0.12   |
| VIII | 2012-E02-035 | Urine | 23 | <=4 | >16 | <=1 | <=1 | 4   | 0.25   |
| VIII | 2012-E02-039 | Urine | 33 | <=4 | >16 | <=1 | <=1 | <=2 | >2     |
| VIII | 2012-E02-040 | Urine | 74 | <=4 | 8   | <=1 | <=1 | 4   | 0.25   |
| VIII | 2012-E02-041 | Urine | 65 | <=4 | >16 | >16 | >16 | >16 | >2     |
| VIII | 2012-E02-043 | Blood | 69 | <=4 | >16 | <=1 | <=1 | 4   | 0.25   |
| VIII | 2012-E02-045 | Urine | 20 | <=4 | 4   | <=1 | <=1 | <=2 | <=0.06 |
| VIII | 2012-E02-049 | Blood | 76 | <=4 | <=2 | <=1 | <=1 | 4   | >2     |
| VIII | 2012-E02-184 | Urine | 7  | <=4 | >16 | <=1 | <=1 | 8   | 0.5    |
| VIII | 2012-E02-185 | Urine | 10 | <=4 | >16 | <=1 | <=1 | 8   | 1      |
| VIII | 2012-E02-191 | Urine | 1  | 8   | >16 | <=1 | <=1 | >16 | <=0.06 |
| VIII | 2012-E02-198 | Urine | 8  | <=4 | >16 | <=1 | <=1 | 4   | <=0.06 |
| VIII | 2012-E02-201 | Blood | 75 | <=4 | >16 | <=1 | <=1 | 4   | 0.5    |
| VIII | 2012-E02-202 | Blood | 83 | <=4 | 4   | <=1 | <=1 | <=2 | <=0.06 |
| VIII | 2012-E02-203 | Blood | 64 | <=4 | >16 | <=1 | <=1 | 4   | <=0.06 |
| VIII | 2012-E02-204 | Blood | 75 | <=4 | 4   | <=1 | <=1 | <=2 | <=0.06 |
| VIII | 2012-E02-205 | Blood | 49 | <=4 | 4   | <=1 | <=1 | <=2 | <=0.06 |
| VIII | 2012-E02-209 | Blood | 67 | <=4 | <=2 | <=1 | <=1 | <=2 | <=0.06 |
| VIII | 2012-E02-227 | Blood | 70 | <=4 | >16 | <=1 | <=1 | 4   | <=0.06 |
| VIII | 2012-E02-228 | Blood | 56 | <=4 | <=2 | <=1 | <=1 | <=2 | <=0.06 |
| VIII | 2012-E02-229 | Blood | 74 | <=4 | >16 | <=1 | <=1 | <=2 | <=0.06 |
| VIII | 2012-E02-240 | Blood | 58 | <=4 | >16 | <=1 | <=1 | 4   | <=0.06 |
| VIII | 2012-E02-242 | Blood | 87 | <=4 | <=2 | <=1 | <=1 | <=2 | 0.12   |
| VIII | 2012-E02-243 | Blood | 68 | <=4 | <=2 | <=1 | <=1 | <=2 | <=0.06 |
| VIII | 2012-E02-246 | Blood | 57 | <=4 | >16 | <=1 | <=1 | >16 | <=0.06 |
| VIII | 2012-N08-002 | Blood | 65 | <=4 | >16 | 2   | 8   | >16 | <=0.06 |
| VIII | 2012-N08-004 | Urine | 44 | <=4 | >16 | <=1 | <=1 | <=2 | <=0.06 |
| VIII | 2012-N08-008 | Blood | 68 | <=4 | >16 | <=1 | <=1 | 16  | 0.25   |
| VIII | 2012-N08-009 | Urine | 75 | 8   | >16 | <=1 | <=1 | 4   | >2     |
| VIII | 2012-N08-014 | Urine | 73 | <=4 | >16 | 4   | 16  | >16 | 0.25   |
| VIII | 2012-N08-015 | Urine | 87 | <=4 | >16 | 8   | >16 | >16 | <=0.06 |
| VIII | 2012-N08-016 | Urine | 37 | <=4 | <=2 | <=1 | <=1 | <=2 | <=0.06 |
| VIII | 2012-N08-023 | Blood | 59 | <=4 | >16 | 8   | >16 | >16 | 0.5    |
| VIII | 2012-N08-027 | Urine | 26 | <=4 | <=2 | <=1 | 2   | <=2 | <=0.06 |
| VIII | 2012-N08-028 | Other | 0  | <=4 | >16 | <=1 | <=1 | 4   | 1      |
| VIII | 2012-N08-031 | Urine | 58 | <=4 | >16 | <=1 | <=1 | >16 | <=0.06 |
| VIII | 2012-N08-036 | Urine | 26 | <=4 | >16 | <=1 | <=1 | 4   | <=0.06 |
| VIII | 2012-N08-038 | Urine | 23 | <=4 | >16 | <=1 | <=1 | 4   | >2     |
| VIII | 2012-N08-044 | Urine | 83 | <=4 | >16 | <=1 | <=1 | 8   | <=0.06 |
| VIII | 2012-N08-048 | Urine | 46 | <=4 | <=2 | <=1 | <=1 | <=2 | <=0.06 |
| VIII | 2012-N08-049 | Urine | 45 | <=4 | >16 | <=1 | <=1 | <=2 | <=0.06 |
| VIII | 2012-N08-201 | Blood | 64 | <=4 | 4   | <=1 | <=1 | <=2 | >2     |
| VIII | 2012-N08-203 | Blood | 62 | <=4 | <=2 | <=1 | <=1 | <=2 | <=0.06 |
| VIII | 2012-N08-223 | Blood | 80 | <=4 | >16 | <=1 | <=1 | 4   | 0.12   |
| VIII | 2012-N08-226 | Blood | 72 | <=4 | >16 | >16 | 16  | >16 | 0.5    |
| VIII | 2012-N08-231 | Blood | 90 | <=4 | >16 | <=1 | <=1 | 8   | 0.5    |
| VIII | 2012-N08-232 | Blood | 90 | <=4 | >16 | 8   | >16 | >16 | >2     |
| VIII | 2012-N08-239 | Blood | 59 | <=4 | >16 | <=1 | <=1 | <=2 | <=0.06 |
| VIII | 2012-N08-240 | Blood | 77 | <=4 | >16 | <=1 | <=1 | 8   | 0.12   |
| VIII | 2012-N08-241 | Blood | 70 | <=4 | <=2 | <=1 | <=1 | <=2 | <=0.06 |
| VIII | 2012-N08-249 | Blood | 54 | <=4 | <=2 | <=1 | <=1 | <=2 | 0.25   |
| VIII | 2012-S09-002 | Blood | 69 | <=4 | 4   | <=1 | <=1 | <=2 | <=0.06 |
| VIII | 2012-S09-003 | Blood | 61 | <=4 | >16 | <=1 | <=1 | 4   | >2     |
| VIII | 2012-S09-004 | Urine | 78 | 16  | >16 | 16  | <=1 | 8   | >2     |
| VIII | 2012-S09-005 | Urine | 78 | <=4 | >16 | <=1 | <=1 | 4   | <=0.06 |
| VIII | 2012-S09-006 | Other | 29 | <=4 | <=2 | <=1 | <=1 | <=2 | <=0.06 |
| VIII | 2012-S09-007 | Urine | 19 | <=4 | >16 | <=1 | <=1 | 4   | <=0.06 |

|      |              |       |    |     |     |     |     |     |        |
|------|--------------|-------|----|-----|-----|-----|-----|-----|--------|
| VIII | 2012-S09-009 | Urine | 15 | <=4 | >16 | <=1 | <=1 | 4   | <=0.06 |
| VIII | 2012-S09-010 | Urine | 57 | <=4 | >16 | <=1 | <=1 | <=2 | >2     |
| VIII | 2012-S09-011 | Urine | 66 | <=4 | >16 | <=1 | <=1 | <=2 | <=0.06 |
| VIII | 2012-S09-012 | Blood | 42 | <=4 | >16 | <=1 | <=1 | >16 | <=0.06 |
| VIII | 2012-S09-017 | Urine | 53 | <=4 | >16 | <=1 | <=1 | <=2 | <=0.06 |
| VIII | 2012-S09-018 | Urine | 68 | <=4 | >16 | <=1 | <=1 | <=2 | 0.12   |
| VIII | 2012-S09-021 | Blood | 68 | <=4 | <=2 | <=1 | <=1 | <=2 | <=0.06 |
| VIII | 2012-S09-024 | Blood | 68 | <=4 | >16 | <=1 | <=1 | <=2 | 0.12   |
| VIII | 2012-S09-025 | Blood | 78 | <=4 | <=2 | <=1 | <=1 | <=2 | <=0.06 |
| VIII | 2012-S09-026 | Urine | 64 | <=4 | >16 | >16 | >16 | >16 | >2     |
| VIII | 2012-S09-027 | Urine | 63 | <=4 | >16 | >16 | 16  | >16 | >2     |
| VIII | 2012-S09-033 | Urine | 81 | <=4 | >16 | <=1 | <=1 | 4   | <=0.06 |
| VIII | 2012-S09-039 | Urine | 69 | <=4 | 8   | <=1 | <=1 | 8   | >2     |
| VIII | 2012-S09-044 | Blood | 78 | 8   | >16 | <=1 | <=1 | 8   | <=0.06 |
| VIII | 2012-S09-045 | Blood | 74 | <=4 | >16 | <=1 | <=1 | 4   | 0.12   |
| VIII | 2012-S09-047 | Urine | 83 | 8   | 4   | <=1 | <=1 | 4   | >2     |
| VIII | 2012-S09-203 | Blood | 61 | <=4 | >16 | <=1 | <=1 | 8   | <=0.06 |
| VIII | 2012-S09-209 | Blood | 88 | <=4 | <=2 | <=1 | <=1 | <=2 | <=0.06 |
| VIII | 2012-S09-210 | Blood | 69 | <=4 | >16 | >16 | 16  | >16 | 0.5    |
| VIII | 2012-S09-215 | Other | 74 | <=4 | >16 | <=1 | <=1 | 4   | >2     |
| VIII | 2012-S09-219 | Blood | 41 | <=4 | >16 | <=1 | <=1 | 4   | <=0.06 |
| VIII | 2012-S09-226 | Blood | 46 | <=4 | >16 | >16 | >16 | >16 | >2     |
| VIII | 2012-S09-232 | Blood | 78 | <=4 | >16 | <=1 | <=1 | 4   | <=0.06 |
| VIII | 2012-S09-234 | Blood | 85 | <=4 | >16 | <=1 | <=1 | <=2 | <=0.06 |
| VIII | 2012-S09-235 | Blood | 83 | <=4 | >16 | <=1 | <=1 | 4   | <=0.06 |
| VIII | 2012-S09-236 | Blood | 86 | 8   | >16 | >16 | >16 | >16 | >2     |
| VIII | 2012-S09-244 | Blood | 65 | <=4 | 4   | <=1 | <=1 | <=2 | <=0.06 |
| VIII | 2012-E03-001 | Urine | 19 | <=4 | <=2 | <=1 | <=1 | <=2 | <=0.06 |
| VIII | 2012-E03-003 | Urine | 26 | <=4 | >16 | <=1 | <=1 | <=2 | 0.25   |
| VIII | 2012-E03-004 | Other | 60 | <=4 | >16 | <=1 | <=1 | <=2 | <=0.06 |
| VIII | 2012-E03-005 | Urine | 31 | <=4 | <=2 | <=1 | <=1 | <=2 | <=0.06 |
| VIII | 2012-E03-006 | Urine | 38 | <=4 | >16 | <=1 | <=1 | 8   | <=0.06 |
| VIII | 2012-E03-008 | Urine | 68 | <=4 | >16 | <=1 | <=1 | 8   | >2     |
| VIII | 2012-E03-009 | Urine | 73 | <=4 | >16 | <=1 | <=1 | 8   | 0.25   |
| VIII | 2012-E03-014 | Urine | 54 | <=4 | <=2 | <=1 | <=1 | <=2 | <=0.06 |
| VIII | 2012-E03-016 | Urine | 77 | <=4 | >16 | 8   | >16 | >16 | <=0.06 |
| VIII | 2012-E03-017 | Urine | 65 | <=4 | >16 | <=1 | <=1 | 4   | >2     |
| VIII | 2012-E03-020 | Urine | 64 | <=4 | >16 | <=1 | <=1 | <=2 | <=0.06 |
| VIII | 2012-E03-021 | Urine | 56 | <=4 | >16 | <=1 | <=1 | >16 | <=0.06 |
| VIII | 2012-E03-022 | Urine | 76 | <=4 | >16 | <=1 | <=1 | 4   | <=0.06 |
| VIII | 2012-E03-024 | Urine | 81 | <=4 | 4   | <=1 | <=1 | 4   | <=0.06 |
| VIII | 2012-E03-025 | Urine | 69 | 32  | >16 | >16 | >16 | >16 | >2     |
| VIII | 2012-E03-026 | Urine | 23 | <=4 | >16 | <=1 | <=1 | 4   | <=0.06 |
| VIII | 2012-E03-027 | Urine | 67 | <=4 | >16 | <=1 | <=1 | 4   | <=0.06 |
| VIII | 2012-E03-030 | Urine | 54 | <=4 | >16 | <=1 | <=1 | 4   | >2     |
| VIII | 2012-E03-035 | Urine | 38 | <=4 | >16 | 8   | 4   | >16 | >2     |
| VIII | 2012-E03-041 | Urine | 94 | <=4 | >16 | 8   | >16 | >16 | <=0.06 |
| VIII | 2012-E03-045 | Urine | 55 | <=4 | >16 | <=1 | <=1 | 8   | >2     |
| VIII | 2012-E03-046 | Urine | 67 | <=4 | <=2 | <=1 | <=1 | <=2 | <=0.06 |
| VIII | 2012-E03-234 | Blood | 58 | <=4 | <=2 | <=1 | <=1 | <=2 | <=0.06 |
| VIII | 2012-E03-239 | Blood | 38 | <=4 | <=2 | <=1 | <=1 | <=2 | <=0.06 |
| VIII | 2012-E03-249 | Blood | 78 | <=4 | >16 | 16  | >16 | >16 | >2     |
| VIII | 2012-C06-003 | Urine | 53 | <=4 | >16 | <=1 | <=1 | <=2 | 0.12   |
| VIII | 2012-C06-008 | Blood | 83 | >32 | >16 | <=1 | 2   | >16 | >2     |
| VIII | 2012-C06-013 | Urine | 81 | <=4 | >16 | <=1 | <=1 | >16 | >2     |
| VIII | 2012-C06-014 | Urine | 71 | <=4 | >16 | <=1 | <=1 | 8   | >2     |
| VIII | 2012-C06-017 | Urine | 72 | <=4 | 8   | <=1 | <=1 | 8   | >2     |
| VIII | 2012-C06-018 | Blood | 87 | <=4 | >16 | 8   | 4   | >16 | >2     |
| VIII | 2012-C06-019 | Blood | 55 | <=4 | >16 | <=1 | <=1 | 4   | <=0.06 |
| VIII | 2012-C06-026 | Urine | 55 | <=4 | >16 | 8   | 2   | >16 | >2     |
| VIII | 2012-C06-027 | Urine | 59 | <=4 | >16 | <=1 | <=1 | <=2 | >2     |

|      |              |       |    |     |     |     |     |     |        |
|------|--------------|-------|----|-----|-----|-----|-----|-----|--------|
| VIII | 2012-C06-028 | Urine | 93 | <=4 | >16 | 16  | >16 | >16 | >2     |
| VIII | 2012-C06-031 | Blood | 76 | <=4 | >16 | <=1 | <=1 | 16  | <=0.06 |
| VIII | 2012-C06-035 | Urine | 84 | <=4 | <=2 | <=1 | <=1 | <=2 | <=0.06 |
| VIII | 2012-C06-036 | Urine | 54 | <=4 | >16 | <=1 | <=1 | <=2 | <=0.06 |
| VIII | 2012-C06-040 | Urine | 52 | <=4 | 4   | <=1 | <=1 | <=2 | <=0.06 |
| VIII | 2012-C06-041 | Other | 73 | <=4 | >16 | <=1 | <=1 | <=2 | <=0.06 |
| VIII | 2012-C06-043 | Urine | 78 | <=4 | >16 | <=1 | <=1 | >16 | >2     |
| VIII | 2012-C06-044 | Urine | 86 | <=4 | >16 | <=1 | <=1 | <=2 | 0.25   |
| VIII | 2012-C06-047 | Urine | 40 | <=4 | 4   | <=1 | <=1 | <=2 | <=0.06 |
| VIII | 2012-C06-201 | Blood | 70 | <=4 | >16 | 8   | 4   | >16 | >2     |
| VIII | 2012-C06-202 | Blood | 76 | <=4 | >16 | 8   | 2   | >16 | >2     |
| VIII | 2012-C06-209 | Blood | 69 | <=4 | >16 | 4   | 16  | >16 | <=0.06 |
| VIII | 2012-C06-213 | Blood | 21 | <=4 | >16 | <=1 | <=1 | 8   | 0.25   |
| VIII | 2012-C06-219 | Blood | 69 | <=4 | 8   | <=1 | 4   | 16  | >2     |
| VIII | 2012-C06-220 | Blood | 33 | <=4 | >16 | 16  | 2   | >16 | >2     |
| VIII | 2012-C06-235 | Blood | 66 | <=4 | >16 | 4   | <=1 | >16 | >2     |
| VIII | 2012-C06-239 | Blood | 77 | <=4 | >16 | <=1 | <=1 | 16  | >2     |
| VIII | 2012-C06-244 | Blood | 68 | <=4 | >16 | <=1 | <=1 | 4   | <=0.06 |
| VIII | 2012-C06-245 | Blood | 78 | <=4 | <=2 | <=1 | <=1 | <=2 | <=0.06 |
| VIII | 2012-C06-246 | Blood | 73 | <=4 | >16 | <=1 | <=1 | 16  | <=0.06 |
| VIII | 2012-C07-004 | Blood | 81 | <=4 | >16 | 4   | <=1 | >16 | >2     |
| VIII | 2012-C07-005 | Blood | 47 | <=4 | >16 | >16 | 16  | >16 | <=0.06 |
| VIII | 2012-C07-010 | Blood | 70 | 8   | >16 | >16 | >16 | >16 | <=0.06 |
| VIII | 2012-C07-019 | Blood | 84 | <=4 | >16 | <=1 | <=1 | 8   | 0.25   |
| VIII | 2012-C07-024 | Urine | 56 | <=4 | <=2 | <=1 | <=1 | <=2 | <=0.06 |
| VIII | 2012-C07-027 | Urine | 25 | <=4 | >16 | <=1 | <=1 | 8   | <=0.06 |
| VIII | 2012-C07-033 | Urine | 36 | <=4 | <=2 | <=1 | <=1 | <=2 | <=0.06 |
| VIII | 2012-C07-034 | Blood | 53 | <=4 | >16 | <=1 | <=1 | <=2 | <=0.06 |
| VIII | 2012-C07-040 | Urine | 69 | <=4 | >16 | 4   | 16  | >16 | 0.5    |
| VIII | 2012-C07-043 | Urine | 0  | <=4 | >16 | <=1 | <=1 | 8   | <=0.06 |
| VIII | 2012-C07-044 | Urine | 56 | <=4 | >16 | <=1 | <=1 | <=2 | 0.12   |
| VIII | 2012-C07-048 | Urine | 66 | 8   | >16 | <=1 | <=1 | 4   | <=0.06 |
| VIII | 2012-C07-209 | Blood | 66 | <=4 | >16 | >16 | 8   | >16 | <=0.06 |
| VIII | 2012-C07-214 | Blood | 57 | <=4 | >16 | >16 | >16 | >16 | >2     |
| VIII | 2012-C07-247 | Blood | 68 | <=4 | 4   | <=1 | <=1 | <=2 | <=0.06 |
| VIII | 2012-C07-249 | Other | 35 | <=4 | >16 | >16 | 8   | >16 | >2     |
| VIII | 2012-N16-001 | Urine | 60 | <=4 | <=2 | <=1 | <=1 | <=2 | <=0.06 |
| VIII | 2012-N16-002 | Urine | 68 | <=4 | >16 | <=1 | <=1 | 4   | <=0.06 |
| VIII | 2012-N16-004 | Urine | 23 | <=4 | >16 | <=1 | <=1 | <=2 | <=0.06 |
| VIII | 2012-N16-005 | Urine | 47 | <=4 | >16 | <=1 | <=1 | <=2 | >2     |
| VIII | 2012-N16-006 | Urine | 70 | <=4 | <=2 | <=1 | <=1 | <=2 | <=0.06 |
| VIII | 2012-N16-008 | Urine | 74 | <=4 | >16 | <=1 | <=1 | 8   | >2     |
| VIII | 2012-N16-011 | Urine | 78 | <=4 | 4   | <=1 | <=1 | <=2 | 0.25   |
| VIII | 2012-N16-013 | Urine | 29 | <=4 | >16 | <=1 | <=1 | 8   | 1      |
| VIII | 2012-N16-016 | Urine | 64 | <=4 | >16 | 8   | 2   | >16 | >2     |
| VIII | 2012-N16-018 | Other | 80 | <=4 | >16 | <=1 | <=1 | 8   | >2     |
| VIII | 2012-N16-020 | Urine | 81 | <=4 | >16 | <=1 | <=1 | 4   | 0.12   |
| VIII | 2012-N16-024 | Urine | 77 | <=4 | >16 | <=1 | <=1 | 8   | >2     |
| VIII | 2012-N16-026 | Urine | 93 | <=4 | >16 | 16  | >16 | >16 | >2     |
| VIII | 2012-N16-030 | Urine | 79 | <=4 | >16 | <=1 | <=1 | 4   | 0.12   |
| VIII | 2012-N16-034 | Urine | 74 | <=4 | >16 | <=1 | <=1 | <=2 | 0.5    |
| VIII | 2012-N16-042 | Urine | 84 | <=4 | >16 | <=1 | <=1 | 4   | >2     |
| VIII | 2012-N16-043 | Urine | 71 | <=4 | >16 | <=1 | <=1 | 4   | <=0.06 |
| VIII | 2012-N16-182 | Urine | 0  | <=4 | >16 | <=1 | <=1 | <=2 | <=0.06 |
| VIII | 2012-N16-190 | Urine | 0  | <=4 | >16 | <=1 | <=1 | <=2 | <=0.06 |
| VIII | 2012-N16-191 | Urine | 17 | <=4 | 4   | <=1 | <=1 | <=2 | <=0.06 |
| VIII | 2012-N16-196 | Urine | 3  | <=4 | <=2 | <=1 | <=1 | <=2 | <=0.06 |
| VIII | 2012-N16-202 | Blood | 79 | 16  | >16 | 8   | 4   | >16 | >2     |
| VIII | 2012-N16-210 | Blood | 39 | <=4 | >16 | <=1 | <=1 | 8   | 0.12   |
| VIII | 2012-N16-212 | Blood | 75 | <=4 | >16 | <=1 | <=1 | <=2 | 0.25   |
| VIII | 2012-N16-213 | Other | 31 | <=4 | <=2 | <=1 | <=1 | <=2 | <=0.06 |

|      |              |       |    |     |     |     |     |     |        |
|------|--------------|-------|----|-----|-----|-----|-----|-----|--------|
| VIII | 2012-N16-223 | Blood | 86 | <=4 | <=2 | <=1 | <=1 | <=2 | <=0.06 |
| VIII | 2012-N16-232 | Other | 60 | <=4 | >16 | <=1 | <=1 | 4   | <=0.06 |
| VIII | 2012-N16-234 | Other | 34 | <=4 | >16 | <=1 | <=1 | 4   | 0.25   |
| VIII | 2012-N16-237 | Blood | 61 | <=4 | >16 | <=1 | <=1 | <=2 | >2     |
| VIII | 2012-N16-245 | Other | 49 | <=4 | <=2 | <=1 | <=1 | <=2 | 0.25   |
| VIII | 2012-N17-002 | Urine | 90 | 8   | 4   | <=1 | <=1 | 4   | <=0.06 |
| VIII | 2012-N17-005 | Urine | 6  | <=4 | >16 | <=1 | <=1 | <=2 | <=0.06 |
| VIII | 2012-N17-006 | Urine | 48 | <=4 | >16 | <=1 | <=1 | 4   | <=0.06 |
| VIII | 2012-N17-007 | Urine | 38 | <=4 | >16 | <=1 | <=1 | <=2 | <=0.06 |
| VIII | 2012-N17-008 | Urine | 80 | <=4 | <=2 | <=1 | <=1 | <=2 | 0.25   |
| VIII | 2012-N17-009 | Urine | 44 | <=4 | <=2 | <=1 | <=1 | <=2 | <=0.06 |
| VIII | 2012-N17-013 | Urine | 24 | <=4 | <=2 | <=1 | <=1 | <=2 | <=0.06 |
| VIII | 2012-N17-018 | Urine | 84 | <=4 | <=2 | <=1 | <=1 | <=2 | <=0.06 |
| VIII | 2012-N17-019 | Urine | 31 | <=4 | >16 | 8   | 4   | >16 | >2     |
| VIII | 2012-N17-020 | Urine | 70 | <=4 | <=2 | <=1 | <=1 | <=2 | <=0.06 |
| VIII | 2012-N17-021 | Urine | 2  | <=4 | <=2 | <=1 | <=1 | <=2 | <=0.06 |
| VIII | 2012-N17-022 | Urine | 0  | <=4 | >16 | <=1 | <=1 | 4   | >2     |
| VIII | 2012-N17-024 | Urine | 72 | <=4 | >16 | >16 | 4   | >16 | <=0.06 |
| VIII | 2012-N17-025 | Urine | 53 | <=4 | >16 | <=1 | <=1 | <=2 | 0.12   |
| VIII | 2012-N17-027 | Urine | 37 | <=4 | >16 | <=1 | <=1 | 4   | <=0.06 |
| VIII | 2012-N17-031 | Urine | 66 | <=4 | >16 | <=1 | <=1 | 4   | <=0.06 |
| VIII | 2012-N17-032 | Urine | 78 | 8   | >16 | <=1 | <=1 | 8   | 0.5    |
| VIII | 2012-N17-033 | Urine | 72 | <=4 | <=2 | <=1 | <=1 | <=2 | <=0.06 |
| VIII | 2012-N17-041 | Urine | 63 | <=4 | >16 | <=1 | <=1 | 16  | >2     |
| VIII | 2012-N17-042 | Urine | 60 | <=4 | >16 | <=1 | <=1 | 4   | <=0.06 |
| VIII | 2012-N17-044 | Urine | 40 | <=4 | <=2 | <=1 | <=1 | <=2 | >2     |
| VIII | 2012-N17-045 | Urine | 55 | 8   | 4   | <=1 | <=1 | 4   | >2     |
| VIII | 2012-N17-046 | Urine | 64 | <=4 | 4   | <=1 | <=1 | <=2 | <=0.06 |
| VIII | 2012-N17-048 | Urine | 80 | <=4 | >16 | 4   | <=1 | >16 | >2     |
| VIII | 2012-N17-049 | Urine | 79 | <=4 | >16 | >16 | 8   | >16 | >2     |
| VIII | 2012-C08-004 | Other | 82 | <=4 | >16 | <=1 | <=1 | 4   | 0.25   |
| VIII | 2012-C08-006 | Urine | 59 | <=4 | <=2 | <=1 | <=1 | <=2 | 0.25   |
| VIII | 2012-C08-007 | Urine | 40 | <=4 | <=2 | <=1 | <=1 | 4   | <=0.06 |
| VIII | 2012-C08-009 | Urine | 72 | <=4 | >16 | <=1 | <=1 | 8   | >2     |
| VIII | 2012-C08-011 | Urine | 46 | <=4 | >16 | <=1 | <=1 | 4   | <=0.06 |
| VIII | 2012-C08-016 | Blood | 68 | <=4 | <=2 | <=1 | <=1 | <=2 | <=0.06 |
| VIII | 2012-C08-017 | Urine | 51 | <=4 | 4   | <=1 | <=1 | <=2 | >2     |
| VIII | 2012-C08-023 | Blood | 56 | <=4 | >16 | <=1 | <=1 | 8   | >2     |
| VIII | 2012-C08-024 | Urine | 24 | <=4 | <=2 | <=1 | <=1 | <=2 | <=0.06 |
| VIII | 2012-C08-031 | Other | 61 | <=4 | >16 | <=1 | <=1 | 4   | <=0.06 |
| VIII | 2012-C08-035 | Blood | 76 | <=4 | >16 | <=1 | <=1 | 4   | <=0.06 |
| VIII | 2012-C08-040 | Blood | 62 | <=4 | >16 | <=1 | <=1 | <=2 | <=0.06 |
| VIII | 2012-C08-046 | Other | 75 | <=4 | >16 | <=1 | <=1 | 8   | 0.25   |
| VIII | 2012-C08-192 | Urine | 7  | <=4 | <=2 | <=1 | <=1 | <=2 | 0.12   |
| VIII | 2012-C08-202 | Blood | 60 | <=4 | >16 | 8   | 8   | >16 | >2     |
| VIII | 2012-C08-212 | Blood | 48 | <=4 | >16 | <=1 | <=1 | 8   | >2     |
| VIII | 2012-C08-214 | Blood | 63 | <=4 | >16 | >16 | >16 | >16 | 0.5    |
| VIII | 2012-C08-227 | Blood | 89 | <=4 | >16 | 8   | 4   | >16 | >2     |
| VIII | 2012-C08-243 | Blood | 72 | <=4 | >16 | <=1 | <=1 | 4   | <=0.06 |
| VIII | 2012-S11-002 | Urine | 61 | <=4 | >16 | 16  | 4   | >16 | 0.12   |
| VIII | 2012-S11-003 | Urine | 72 | <=4 | >16 | <=1 | <=1 | 4   | <=0.06 |
| VIII | 2012-S11-004 | Urine | 89 | <=4 | 4   | <=1 | <=1 | <=2 | 0.25   |
| VIII | 2012-S11-005 | Urine | 35 | <=4 | <=2 | <=1 | <=1 | <=2 | 0.25   |
| VIII | 2012-S11-007 | Urine | 41 | <=4 | >16 | <=1 | <=1 | >16 | <=0.06 |
| VIII | 2012-S11-008 | Urine | 23 | <=4 | <=2 | <=1 | <=1 | <=2 | <=0.06 |
| VIII | 2012-S11-009 | Blood | 82 | <=4 | >16 | <=1 | <=1 | 4   | <=0.06 |
| VIII | 2012-S11-011 | Urine | 73 | <=4 | >16 | <=1 | <=1 | <=2 | 0.25   |
| VIII | 2012-S11-013 | Urine | 47 | 8   | >16 | <=1 | <=1 | 8   | <=0.06 |
| VIII | 2012-S11-014 | Urine | 85 | <=4 | >16 | 8   | 2   | >16 | >2     |
| VIII | 2012-S11-017 | Urine | 47 | <=4 | 4   | <=1 | <=1 | <=2 | 0.25   |
| VIII | 2012-S11-019 | Urine | 77 | <=4 | >16 | <=1 | <=1 | 4   | 0.25   |

|      |              |       |    |     |     |     |     |     |        |
|------|--------------|-------|----|-----|-----|-----|-----|-----|--------|
| VIII | 2012-S11-020 | Urine | 57 | <=4 | 4   | <=1 | <=1 | 4   | <=0.06 |
| VIII | 2012-S11-021 | Urine | 36 | <=4 | >16 | <=1 | <=1 | 4   | >2     |
| VIII | 2012-S11-028 | Urine | 88 | <=4 | >16 | <=1 | <=1 | 4   | <=0.06 |
| VIII | 2012-S11-029 | Urine | 88 | <=4 | >16 | <=1 | <=1 | 8   | <=0.06 |
| VIII | 2012-S11-030 | Urine | 74 | <=4 | >16 | 8   | 16  | >16 | >2     |
| VIII | 2012-S11-031 | Urine | 86 | <=4 | >16 | 8   | 16  | >16 | >2     |
| VIII | 2012-S11-033 | Urine | 69 | <=4 | <=2 | <=1 | <=1 | <=2 | <=0.06 |
| VIII | 2012-S11-036 | Urine | 74 | <=4 | >16 | <=1 | <=1 | <=2 | >2     |
| VIII | 2012-S11-039 | Urine | 76 | <=4 | >16 | >16 | 8   | >16 | >2     |
| VIII | 2012-S11-046 | Urine | 86 | <=4 | >16 | <=1 | <=1 | <=2 | <=0.06 |
| VIII | 2012-S11-049 | Blood | 74 | <=4 | >16 | <=1 | <=1 | >16 | <=0.06 |
| VIII | 2012-S11-203 | Blood | 83 | 8   | >16 | <=1 | <=1 | 4   | >2     |
| VIII | 2012-S11-206 | Blood | 81 | <=4 | >16 | <=1 | <=1 | 4   | 0.12   |
| VIII | 2012-S11-215 | Blood | 74 | <=4 | <=2 | <=1 | <=1 | <=2 | <=0.06 |
| VIII | 2012-S11-222 | Blood | 86 | <=4 | <=2 | <=1 | <=1 | <=2 | <=0.06 |
| VIII | 2012-S11-223 | Blood | 82 | <=4 | >16 | <=1 | <=1 | 8   | <=0.06 |
| VIII | 2012-S11-224 | Blood | 41 | <=4 | <=2 | <=1 | <=1 | <=2 | <=0.06 |
| VIII | 2012-S11-226 | Blood | 48 | <=4 | >16 | 4   | 8   | >16 | <=0.06 |
| VIII | 2012-S11-231 | Blood | 84 | <=4 | >16 | <=1 | <=1 | 4   | 0.25   |
| VIII | 2012-S11-233 | Blood | 48 | <=4 | >16 | >16 | 8   | >16 | >2     |
| VIII | 2012-S11-234 | Blood | 62 | <=4 | >16 | <=1 | <=1 | <=2 | >2     |
| VIII | 2012-S11-235 | Blood | 84 | <=4 | <=2 | <=1 | <=1 | <=2 | >2     |
| VIII | 2012-S11-238 | Blood | 75 | <=4 | >16 | <=1 | <=1 | 4   | <=0.06 |
| VIII | 2012-S11-239 | Blood | 64 | <=4 | >16 | <=1 | <=1 | 4   | <=0.06 |
| VIII | 2012-S11-245 | Blood | 53 | <=4 | 4   | <=1 | <=1 | <=2 | <=0.06 |
| VIII | 2012-S11-246 | Blood | 80 | <=4 | >16 | >16 | 16  | >16 | >2     |
| VIII | 2012-N23-001 | Urine | 31 | <=4 | >16 | <=1 | <=1 | 4   | 0.12   |
| VIII | 2012-N23-003 | Urine | 50 | <=4 | <=2 | <=1 | <=1 | <=2 | <=0.06 |
| VIII | 2012-N23-004 | Urine | 35 | <=4 | >16 | <=1 | <=1 | 4   | <=0.06 |
| VIII | 2012-N23-005 | Urine | 85 | <=4 | 4   | <=1 | <=1 | 4   | >2     |
| VIII | 2012-N23-006 | Urine | 90 | <=4 | <=2 | <=1 | <=1 | <=2 | <=0.06 |
| VIII | 2012-N23-007 | Urine | 53 | <=4 | 4   | <=1 | <=1 | <=2 | <=0.06 |
| VIII | 2012-N23-018 | Urine | 51 | <=4 | >16 | <=1 | <=1 | 8   | <=0.06 |
| VIII | 2012-N23-019 | Urine | 43 | <=4 | >16 | <=1 | <=1 | 8   | <=0.06 |
| VIII | 2012-N23-020 | Urine | 46 | <=4 | 4   | <=1 | <=1 | <=2 | <=0.06 |
| VIII | 2012-N23-021 | Urine | 71 | <=4 | 4   | <=1 | <=1 | <=2 | >2     |
| VIII | 2012-N23-022 | Urine | 74 | <=4 | >16 | <=1 | <=1 | 4   | >2     |
| VIII | 2012-N23-024 | Urine | 25 | <=4 | 4   | <=1 | <=1 | <=2 | <=0.06 |
| VIII | 2012-N23-027 | Urine | 57 | <=4 | >16 | <=1 | <=1 | <=2 | <=0.06 |
| VIII | 2012-N23-029 | Urine | 59 | <=4 | <=2 | <=1 | <=1 | <=2 | <=0.06 |
| VIII | 2012-N23-030 | Urine | 88 | <=4 | >16 | <=1 | <=1 | 8   | 0.25   |
| VIII | 2012-N23-031 | Urine | 68 | <=4 | 4   | <=1 | <=1 | <=2 | <=0.06 |
| VIII | 2012-N23-032 | Urine | 89 | <=4 | >16 | <=1 | <=1 | 4   | <=0.06 |
| VIII | 2012-N23-033 | Urine | 79 | <=4 | 4   | <=1 | <=1 | <=2 | >2     |
| VIII | 2012-N23-034 | Urine | 78 | <=4 | <=2 | <=1 | <=1 | <=2 | <=0.06 |
| VIII | 2012-N23-036 | Urine | 69 | <=4 | >16 | <=1 | <=1 | <=2 | 0.25   |
| VIII | 2012-N23-037 | Urine | 78 | <=4 | 4   | <=1 | <=1 | <=2 | <=0.06 |
| VIII | 2012-N23-039 | Urine | 69 | <=4 | 4   | <=1 | <=1 | <=2 | <=0.06 |
| VIII | 2012-N23-041 | Urine | 80 | <=4 | <=2 | <=1 | <=1 | <=2 | <=0.06 |
| VIII | 2012-N23-042 | Urine | 6  | <=4 | >16 | 8   | >16 | >16 | <=0.06 |
| VIII | 2012-N23-043 | Urine | 68 | <=4 | >16 | <=1 | <=1 | 4   | <=0.06 |
| VIII | 2012-N23-044 | Urine | 60 | <=4 | >16 | <=1 | <=1 | >16 | >2     |
| VIII | 2012-N23-045 | Urine | 27 | <=4 | >16 | <=1 | <=1 | 8   | 0.25   |
| VIII | 2012-N23-046 | Urine | 8  | <=4 | 4   | <=1 | <=1 | <=2 | 0.12   |
| VIII | 2012-N23-047 | Urine | 73 | <=4 | >16 | <=1 | <=1 | <=2 | >2     |
| VIII | 2012-N23-048 | Urine | 97 | <=4 | <=2 | <=1 | <=1 | <=2 | <=0.06 |
| VIII | 2012-N23-219 | Blood | 22 | <=4 | >16 | <=1 | <=1 | 4   | <=0.06 |
| VIII | 2012-N23-243 | Blood | 64 | <=4 | >16 | <=1 | <=1 | 4   | <=0.06 |
| VIII | 2012-N23-250 | Blood | 76 | <=4 | 4   | <=1 | <=1 | <=2 | <=0.06 |
| VIII | 2012-N21-013 | Urine | 81 | <=4 | >16 | <=1 | <=1 | 4   | 1      |
| VIII | 2012-N21-014 | Urine | 95 | <=4 | >16 | >16 | >16 | >16 | >2     |

|      |              |       |    |     |     |     |     |     |        |
|------|--------------|-------|----|-----|-----|-----|-----|-----|--------|
| VIII | 2012-N21-015 | Urine | 25 | <=4 | >16 | >16 | 16  | >16 | >2     |
| VIII | 2012-N21-017 | Urine | 83 | <=4 | >16 | >16 | 16  | >16 | <=0.06 |
| VIII | 2012-N21-021 | Urine | 80 | <=4 | >16 | <=1 | <=1 | 4   | 1      |
| VIII | 2012-N21-022 | Urine | 21 | <=4 | >16 | <=1 | <=1 | 8   | <=0.06 |
| VIII | 2012-N21-029 | Urine | 96 | <=4 | >16 | <=1 | <=1 | 4   | <=0.06 |
| VIII | 2012-N21-032 | Urine | 71 | 8   | >16 | <=1 | <=1 | 4   | >2     |
| VIII | 2012-N21-033 | Urine | 1  | <=4 | >16 | <=1 | <=1 | 4   | <=0.06 |
| VIII | 2012-N21-034 | Urine | 46 | <=4 | >16 | <=1 | <=1 | 4   | <=0.06 |
| VIII | 2012-N21-036 | Urine | 57 | <=4 | 4   | <=1 | <=1 | <=2 | <=0.06 |
| VIII | 2012-N21-037 | Urine | 28 | <=4 | 4   | <=1 | <=1 | <=2 | <=0.06 |
| VIII | 2012-N21-042 | Urine | 36 | <=4 | 4   | <=1 | <=1 | <=2 | <=0.06 |
| VIII | 2012-N21-046 | Urine | 0  | <=4 | >16 | <=1 | <=1 | <=2 | <=0.06 |
| VIII | 2012-N21-047 | Urine | 57 | 8   | <=2 | <=1 | <=1 | <=2 | <=0.06 |
| VIII | 2012-N21-048 | Other | 73 | <=4 | >16 | >16 | >16 | >16 | >2     |
| VIII | 2012-N21-189 | Blood | 0  | <=4 | 4   | <=1 | <=1 | <=2 | 0.12   |
| VIII | 2012-N21-216 | Blood | 72 | 8   | >16 | >16 | >16 | >16 | <=0.06 |
| VIII | 2012-N21-218 | Blood | 50 | <=4 | >16 | 4   | >16 | >16 | 0.5    |
| VIII | 2012-N21-219 | Blood | 48 | <=4 | >16 | <=1 | <=1 | 4   | <=0.06 |
| VIII | 2012-N21-221 | Blood | 76 | 16  | >16 | 2   | <=1 | >16 | >2     |
| VIII | 2012-N21-223 | Blood | 77 | <=4 | >16 | <=1 | <=1 | 4   | <=0.06 |
| VIII | 2012-N21-224 | Blood | 70 | <=4 | >16 | <=1 | <=1 | <=2 | 0.25   |
| VIII | 2012-N21-225 | Blood | 80 | <=4 | >16 | <=1 | <=1 | 4   | <=0.06 |
| VIII | 2012-N21-229 | Blood | 57 | <=4 | >16 | <=1 | <=1 | <=2 | <=0.06 |
| VIII | 2012-N21-230 | Blood | 85 | <=4 | >16 | <=1 | <=1 | 4   | >2     |
| VIII | 2012-N21-235 | Blood | 39 | 8   | 4   | <=1 | <=1 | <=2 | <=0.06 |
| VIII | 2012-N21-236 | Blood | 56 | <=4 | >16 | <=1 | <=1 | 8   | <=0.06 |
| VIII | 2012-N21-238 | Blood | 78 | <=4 | >16 | <=1 | <=1 | 4   | <=0.06 |
| VIII | 2012-N21-239 | Blood | 62 | <=4 | >16 | 8   | 16  | >16 | >2     |
| VIII | 2012-N21-240 | Blood | 84 | <=4 | >16 | <=1 | <=1 | 8   | <=0.06 |
| VIII | 2012-N21-241 | Blood | 27 | <=4 | <=2 | <=1 | <=1 | 4   | 0.25   |
| VIII | 2012-N21-243 | Blood | 65 | <=4 | <=2 | <=1 | <=1 | <=2 | <=0.06 |
| VIII | 2012-N21-245 | Blood | 91 | <=4 | >16 | <=1 | <=1 | 4   | <=0.06 |
| VIII | 2012-N21-248 | Blood | 56 | <=4 | >16 | 8   | 16  | >16 | >2     |
| VIII | 2012-N21-249 | Blood | 81 | <=4 | >16 | <=1 | <=1 | 8   | <=0.06 |
| VIII | 2012-C09-001 | Blood | 38 | <=4 | <=2 | <=1 | <=1 | <=2 | <=0.06 |
| VIII | 2012-C09-003 | Blood | 58 | <=4 | >16 | <=1 | <=1 | 4   | <=0.06 |
| VIII | 2012-C09-004 | Blood | 87 | <=4 | >16 | 16  | >16 | >16 | >2     |
| VIII | 2012-C09-005 | Blood | 81 | <=4 | <=2 | <=1 | <=1 | <=2 | <=0.06 |
| VIII | 2012-C09-012 | Urine | 58 | <=4 | >16 | <=1 | <=1 | <=2 | 0.25   |
| VIII | 2012-C09-013 | Urine | 56 | 8   | <=2 | <=1 | <=1 | <=2 | <=0.06 |
| VIII | 2012-C09-014 | Urine | 49 | <=4 | >16 | <=1 | <=1 | <=2 | <=0.06 |
| VIII | 2012-C09-018 | Urine | 81 | <=4 | >16 | <=1 | <=1 | 16  | >2     |
| VIII | 2012-C09-024 | Urine | 80 | 8   | >16 | >16 | >16 | >16 | >2     |
| VIII | 2012-C09-025 | Urine | 85 | <=4 | >16 | <=1 | <=1 | <=2 | 0.25   |
| VIII | 2012-C09-027 | Urine | 70 | <=4 | >16 | <=1 | <=1 | 16  | >2     |
| VIII | 2012-C09-028 | Urine | 52 | <=4 | 4   | <=1 | <=1 | <=2 | <=0.06 |
| VIII | 2012-C09-034 | Urine | 66 | <=4 | 4   | <=1 | <=1 | <=2 | 0.25   |
| VIII | 2012-C09-037 | Urine | 79 | <=4 | <=2 | <=1 | <=1 | <=2 | <=0.06 |
| VIII | 2012-C09-039 | Urine | 1  | <=4 | >16 | <=1 | <=1 | 4   | <=0.06 |
| VIII | 2012-C09-040 | Other | 84 | <=4 | >16 | >16 | 8   | >16 | >2     |
| VIII | 2012-C09-046 | Urine | 74 | <=4 | 4   | <=1 | 2   | <=2 | <=0.06 |
| VIII | 2012-C09-047 | Urine | 77 | <=4 | 4   | <=1 | <=1 | 4   | >2     |
| VIII | 2012-C09-049 | Other | 19 | <=4 | >16 | <=1 | <=1 | <=2 | >2     |
| VIII | 2012-C09-203 | Other | 34 | 8   | >16 | <=1 | <=1 | <=2 | <=0.06 |
| VIII | 2012-C09-206 | Blood | 76 | <=4 | <=2 | <=1 | <=1 | <=2 | <=0.06 |
| VIII | 2012-C09-222 | Blood | 65 | <=4 | >16 | <=1 | <=1 | 4   | 1      |
| VIII | 2012-C09-235 | Blood | 81 | <=4 | >16 | <=1 | <=1 | 4   | 2      |
| VIII | 2012-C09-240 | Blood | 77 | <=4 | >16 | <=1 | <=1 | <=2 | <=0.06 |
| VIII | 2012-C09-245 | Blood | 81 | <=4 | >16 | 8   | 2   | >16 | >2     |
| VIII | 2012-C09-248 | Other | 70 | <=4 | <=2 | <=1 | <=1 | <=2 | <=0.06 |
| VIII | 2012-C09-249 | Blood | 73 | <=4 | >16 | <=1 | <=1 | <=2 | 0.25   |



|      |              |       |    |     |     |     |     |     |        |
|------|--------------|-------|----|-----|-----|-----|-----|-----|--------|
| VIII | 2012-C09-250 | Blood | 56 | <=4 | 4   | <=1 | <=1 | <=2 | <=0.06 |
| VIII | 2012-C10-004 | Urine | 44 | <=4 | <=2 | <=1 | <=1 | 4   | <=0.06 |
| VIII | 2012-C10-005 | Other | 21 | <=4 | >16 | <=1 | <=1 | <=2 | <=0.06 |
| VIII | 2012-C10-007 | Urine | 50 | <=4 | <=2 | <=1 | <=1 | <=2 | <=0.06 |
| VIII | 2012-C10-010 | Urine | 69 | <=4 | <=2 | <=1 | <=1 | <=2 | 0.25   |
| VIII | 2012-C10-011 | Urine | 76 | <=4 | <=2 | <=1 | <=1 | <=2 | <=0.06 |
| VIII | 2012-C10-012 | Urine | 22 | <=4 | <=2 | <=1 | <=1 | <=2 | <=0.06 |
| VIII | 2012-C10-013 | Urine | 80 | <=4 | >16 | >16 | >16 | >16 | >2     |
| VIII | 2012-C10-022 | Urine | 54 | <=4 | 4   | <=1 | <=1 | <=2 | <=0.06 |
| VIII | 2012-C10-023 | Urine | 82 | <=4 | >16 | <=1 | <=1 | 4   | >2     |
| VIII | 2012-C10-024 | Blood | 87 | <=4 | 4   | <=1 | <=1 | <=2 | <=0.06 |
| VIII | 2012-C10-027 | Urine | 93 | <=4 | >16 | 2   | 2   | >16 | <=0.06 |
| VIII | 2012-C10-031 | Urine | 88 | <=4 | >16 | <=1 | <=1 | 4   | >2     |
| VIII | 2012-C10-032 | Urine | 88 | <=4 | >16 | <=1 | <=1 | 8   | >2     |
| VIII | 2012-C10-034 | Urine | 61 | <=4 | >16 | <=1 | <=1 | 8   | <=0.06 |
| VIII | 2012-C10-035 | Urine | 83 | <=4 | >16 | <=1 | <=1 | >16 | >2     |
| VIII | 2012-C10-046 | Urine | 73 | <=4 | >16 | <=1 | <=1 | <=2 | <=0.06 |
| VIII | 2012-C10-047 | Urine | 71 | <=4 | >16 | 16  | >16 | >16 | >2     |
| VIII | 2012-C10-048 | Urine | 73 | <=4 | 4   | <=1 | <=1 | <=2 | <=0.06 |
| VIII | 2012-C10-189 | Urine | 7  | <=4 | <=2 | <=1 | <=1 | <=2 | <=0.06 |
| VIII | 2012-C10-200 | Urine | 2  | <=4 | >16 | <=1 | <=1 | 4   | 0.25   |
| VIII | 2012-C10-201 | Blood | 85 | <=4 | >16 | <=1 | <=1 | <=2 | <=0.06 |
| VIII | 2012-C10-207 | Blood | 59 | <=4 | >16 | <=1 | <=1 | 8   | <=0.06 |
| VIII | 2012-C10-208 | Blood | 47 | <=4 | >16 | <=1 | <=1 | 8   | <=0.06 |
| VIII | 2012-C10-212 | Blood | 84 | <=4 | >16 | >16 | 16  | >16 | >2     |
| VIII | 2012-C10-213 | Blood | 56 | <=4 | >16 | <=1 | <=1 | 4   | <=0.06 |
| VIII | 2012-C10-214 | Blood | 68 | <=4 | >16 | <=1 | <=1 | <=2 | <=0.06 |
| VIII | 2012-C10-215 | Blood | 58 | <=4 | >16 | <=1 | <=1 | >16 | <=0.06 |
| VIII | 2012-C10-219 | Blood | 19 | <=4 | >16 | <=1 | <=1 | <=2 | <=0.06 |
| VIII | 2012-C10-222 | Blood | 15 | <=4 | >16 | <=1 | <=1 | 4   | 0.25   |
| VIII | 2012-C10-223 | Blood | 60 | <=4 | >16 | <=1 | <=1 | 4   | <=0.06 |
| VIII | 2012-C10-238 | Blood | 78 | <=4 | >16 | <=1 | <=1 | 16  | <=0.06 |
| VIII | 2012-C10-243 | Blood | 71 | <=4 | >16 | <=1 | <=1 | 4   | <=0.06 |
| VIII | 2012-C10-244 | Blood | 82 | <=4 | >16 | <=1 | <=1 | <=2 | <=0.06 |
| VIII | 2012-C10-245 | Blood | 77 | <=4 | >16 | <=1 | <=1 | 8   | >2     |
| VIII | 2012-C10-246 | Blood | 69 | <=4 | >16 | <=1 | <=1 | 4   | 2      |
| VIII | 2012-E04-002 | Blood | 91 | <=4 | >16 | <=1 | <=1 | <=2 | 0.12   |
| VIII | 2012-E04-009 | Blood | 68 | <=4 | >16 | <=1 | <=1 | 16  | >2     |
| VIII | 2012-E04-013 | Blood | 66 | <=4 | >16 | 4   | >16 | >16 | <=0.06 |
| VIII | 2012-E04-020 | Blood | 74 | <=4 | >16 | <=1 | <=1 | >16 | >2     |
| VIII | 2012-E04-031 | Blood | 76 | <=4 | 4   | <=1 | <=1 | <=2 | <=0.06 |
| VIII | 2012-E04-052 | Blood | 84 | <=4 | >16 | <=1 | <=1 | 8   | <=0.06 |
| VIII | 2012-E04-067 | Blood | 75 | <=4 | >16 | <=1 | <=1 | 4   | <=0.06 |
| VIII | 2012-E04-068 | Blood | 54 | <=4 | >16 | <=1 | <=1 | 8   | >2     |
| VIII | 2012-E04-088 | Blood | 0  | <=4 | 4   | <=1 | <=1 | <=2 | <=0.06 |
| VIII | 2012-E04-090 | Blood | 75 | <=4 | >16 | <=1 | <=1 | 4   | <=0.06 |
| VIII | 2012-E04-100 | Blood | 75 | <=4 | >16 | >16 | 4   | >16 | 0.25   |
| VIII | 2012-E04-131 | Blood | 72 | <=4 | >16 | >16 | >16 | >16 | >2     |
| VIII | 2012-E04-136 | Blood | 56 | <=4 | >16 | <=1 | <=1 | 4   | <=0.06 |
| VIII | 2012-E04-150 | Blood | 98 | <=4 | >16 | <=1 | <=1 | 4   | <=0.06 |
| VIII | 2012-E04-171 | Blood | 71 | <=4 | <=2 | <=1 | <=1 | <=2 | 0.12   |
| VIII | 2012-E04-173 | Blood | 21 | <=4 | >16 | <=1 | <=1 | 4   | <=0.06 |
| VIII | 2012-E04-181 | Blood | 58 | <=4 | >16 | 8   | 16  | >16 | <=0.06 |
| VIII | 2012-E04-194 | Blood | 46 | <=4 | 4   | <=1 | <=1 | 4   | <=0.06 |
| VIII | 2012-E04-206 | Blood | 56 | <=4 | >16 | <=1 | <=1 | <=2 | <=0.06 |
| VIII | 2012-E04-209 | Blood | 77 | <=4 | <=2 | <=1 | <=1 | <=2 | >2     |
| VIII | 2012-E04-224 | Blood | 72 | <=4 | >16 | <=1 | <=1 | 4   | 0.25   |
| VIII | 2012-E04-231 | Blood | 72 | <=4 | >16 | <=1 | <=1 | 4   | <=0.06 |
| VIII | 2012-E04-232 | Blood | 78 | <=4 | >16 | 2   | <=1 | >16 | >2     |
| VIII | 2012-E04-246 | Blood | 55 | <=4 | 4   | <=1 | <=1 | <=2 | <=0.06 |
| VIII | 2012-E04-279 | Blood | 89 | <=4 | >16 | <=1 | <=1 | 16  | <=0.06 |

|      |              |       |    |     |     |     |     |     |        |
|------|--------------|-------|----|-----|-----|-----|-----|-----|--------|
| VIII | 2012-E04-283 | Blood | 75 | <=4 | >16 | 16  | >16 | >16 | >2     |
| VIII | 2012-E04-285 | Blood | 66 | <=4 | >16 | <=1 | <=1 | 4   | 0.25   |
| VIII | 2012-E04-287 | Blood | 57 | <=4 | >16 | <=1 | <=1 | 16  | <=0.06 |
| VIII | 2012-E04-292 | Blood | 24 | <=4 | >16 | <=1 | <=1 | 4   | 0.12   |
| VIII | 2012-E04-303 | Blood | 58 | <=4 | >16 | <=1 | <=1 | 8   | 0.25   |
| VIII | 2012-E04-308 | Blood | 85 | <=4 | >16 | 8   | 16  | >16 | <=0.06 |
| VIII | 2012-E04-314 | Blood | 63 | <=4 | >16 | 8   | 2   | >16 | <=0.06 |
| VIII | 2012-E04-315 | Blood | 63 | <=4 | <=2 | <=1 | <=1 | <=2 | <=0.06 |
| VIII | 2012-E04-340 | Blood | 61 | <=4 | >16 | <=1 | <=1 | <=2 | 0.12   |
| VIII | 2012-E04-341 | Blood | 81 | <=4 | >16 | <=1 | <=1 | 16  | <=0.06 |





|    |       |     |     |       |      |       |        |     |       |
|----|-------|-----|-----|-------|------|-------|--------|-----|-------|
|    | <=0.5 | 4   | 4   | <=0.5 | <=32 | <=0.5 | <=0.25 | 64  | >2    |
|    | <=0.5 | <=2 | 2   | <=0.5 | <=32 | <=0.5 | <=0.25 | >64 | <=0.5 |
|    | <=0.5 | 4   | 4   | <=0.5 | <=32 | >8    | <=0.25 | >64 | >2    |
|    | <=0.5 | <=2 | 4   | <=0.5 | <=32 | 1     | <=0.25 | >64 | >2    |
|    | <=0.5 | 16  | 8   | <=0.5 | <=32 | <=0.5 | <=0.25 | <=4 | <=0.5 |
|    | >16   | 16  | >16 | >32   | <=32 | >8    | <=0.25 | >64 | >2    |
|    | 4     | 4   | >16 | 16    | <=32 | 8     | <=0.25 | >64 | >2    |
| >4 | <=0.5 | 4   | 4   | <=0.5 | <=32 | <=0.5 | <=0.25 | >64 | <=0.5 |
|    | 2     | >16 | >16 | 32    | >64  | >8    | 4      | >64 | >2    |
|    | 1     | >16 | >16 | 32    | >64  | >8    | 0.5    | >64 | >2    |
|    | <=0.5 | 8   | 4   | <=0.5 | <=32 | <=0.5 | <=0.25 | >64 | <=0.5 |
|    | <=0.5 | 4   | 4   | <=0.5 | <=32 | <=0.5 | <=0.25 | >64 | <=0.5 |
|    | <=0.5 | <=2 | 4   | <=0.5 | <=32 | <=0.5 | <=0.25 | >64 | >2    |
|    | <=0.5 | 8   | 8   | <=0.5 | <=32 | <=0.5 | <=0.25 | >64 | >2    |
|    | <=0.5 | <=2 | 4   | <=0.5 | <=32 | <=0.5 | <=0.25 | <=4 | >2    |
|    | <=0.5 | 4   | 4   | <=0.5 | <=32 | 2     | <=0.25 | <=4 | <=0.5 |
|    | <=0.5 | <=2 | <=1 | <=0.5 | <=32 | >8    | <=0.25 | >64 | >2    |
|    | <=0.5 | <=2 | 2   | <=0.5 | <=32 | <=0.5 | <=0.25 | >64 | >2    |
|    | <=0.5 | <=2 | 2   | <=0.5 | <=32 | <=0.5 | <=0.25 | >64 | >2    |
|    | <=0.5 | 4   | 4   | <=0.5 | <=32 | 2     | <=0.25 | <=4 | <=0.5 |
|    | <=0.5 | <=2 | 2   | <=0.5 | <=32 | 2     | <=0.25 | <=4 | <=0.5 |
|    | <=0.5 | 4   | 8   | <=0.5 | <=32 | 1     | <=0.25 | >64 | >2    |
|    | <=0.5 | 4   | 8   | <=0.5 | <=32 | >8    | <=0.25 | >64 | >2    |
|    | >16   | 16  | >16 | >32   | 64   | >8    | <=0.25 | >64 | >2    |
|    | <=0.5 | 4   | 4   | <=0.5 | <=32 | 1     | <=0.25 | 16  | <=0.5 |
|    | <=0.5 | <=2 | 4   | <=0.5 | <=32 | 1     | <=0.25 | >64 | >2    |
|    | <=0.5 | <=2 | 2   | <=0.5 | <=32 | >8    | <=0.25 | >64 | >2    |
|    | <=0.5 | <=2 | 4   | <=0.5 | <=32 | <=0.5 | <=0.25 | >64 | >2    |
|    | <=0.5 | <=2 | 2   | <=0.5 | <=32 | <=0.5 | <=0.25 | >64 | >2    |
|    | <=0.5 | 4   | 4   | <=0.5 | <=32 | >8    | <=0.25 | >64 | >2    |
|    | <=0.5 | 8   | 16  | <=0.5 | <=32 | >8    | <=0.25 | >64 | >2    |
|    | <=0.5 | 16  | 16  | <=0.5 | >64  | >8    | <=0.25 | <=4 | >2    |
|    | <=0.5 | >16 | >16 | 8     | <=32 | >8    | <=0.25 | >64 | >2    |
|    | <=0.5 | <=2 | <=1 | <=0.5 | <=32 | <=0.5 | <=0.25 | <=4 | <=0.5 |
|    | <=0.5 | 8   | 8   | <=0.5 | <=32 | <=0.5 | <=0.25 | <=4 | <=0.5 |
|    | <=0.5 | 8   | 8   | <=0.5 | <=32 | 1     | <=0.25 | >64 | >2    |
|    | <=0.5 | 4   | 4   | <=0.5 | <=32 | <=0.5 | <=0.25 | <=4 | <=0.5 |
|    | <=0.5 | 4   | 4   | <=0.5 | <=32 | <=0.5 | <=0.25 | <=4 | <=0.5 |
|    | <=0.5 | <=2 | 4   | <=0.5 | <=32 | <=0.5 | <=0.25 | >64 | <=0.5 |
|    | <=0.5 | <=2 | 2   | <=0.5 | <=32 | 1     | <=0.25 | >64 | <=0.5 |
|    | <=0.5 | 4   | 4   | <=0.5 | <=32 | 1     | <=0.25 | <=4 | <=0.5 |
|    | <=0.5 | <=2 | 4   | <=0.5 | <=32 | <=0.5 | <=0.25 | 64  | >2    |
|    | <=0.5 | 8   | 8   | <=0.5 | <=32 | <=0.5 | <=0.25 | <=4 | <=0.5 |
|    | <=0.5 | <=2 | 8   | <=0.5 | <=32 | <=0.5 | <=0.25 | 64  | >2    |
|    | <=0.5 | 4   | 4   | <=0.5 | <=32 | 1     | <=0.25 | 16  | >2    |
|    | <=0.5 | 4   | 8   | <=0.5 | <=32 | 1     | <=0.25 | >64 | >2    |
|    | <=0.5 | 4   | 4   | <=0.5 | <=32 | <=0.5 | <=0.25 | >64 | <=0.5 |
|    | <=0.5 | <=2 | 8   | <=0.5 | <=32 | <=0.5 | <=0.25 | 64  | <=0.5 |
|    | <=0.5 | 8   | 4   | <=0.5 | <=32 | <=0.5 | <=0.25 | 64  | >2    |
|    | <=0.5 | <=2 | <=1 | <=0.5 | <=32 | <=0.5 | <=0.25 | <=4 | <=0.5 |
|    | <=0.5 | 4   | 4   | <=0.5 | <=32 | 1     | <=0.25 | >64 | >2    |
|    | 2     | 4   | >16 | 16    | <=32 | >8    | 1      | >64 | >2    |
|    | <=0.5 | 8   | 8   | <=0.5 | <=32 | 4     | <=0.25 | >64 | >2    |
|    | <=0.5 | 16  | 16  | <=0.5 | <=32 | <=0.5 | <=0.25 | 8   | <=0.5 |
|    | <=0.5 | 4   | 4   | <=0.5 | <=32 | <=0.5 | <=0.25 | <=4 | >2    |
|    | <=0.5 | 8   | 4   | <=0.5 | <=32 | 1     | <=0.25 | >64 | >2    |
|    | <=0.5 | 4   | 4   | <=0.5 | <=32 | <=0.5 | <=0.25 | <=4 | <=0.5 |
|    | <=0.5 | <=2 | 4   | <=0.5 | <=32 | <=0.5 | <=0.25 | >64 | >2    |
|    | <=0.5 | <=2 | 4   | <=0.5 | <=32 | 1     | <=0.25 | >64 | >2    |
|    | <=0.5 | <=2 | 4   | <=0.5 | <=32 | <=0.5 | <=0.25 | >64 | <=0.5 |
|    | 1     | 16  | >16 | 8     | 64   | >8    | <=0.25 | 64  | >2    |











|       |     |     |       |      |       |        |     |       |
|-------|-----|-----|-------|------|-------|--------|-----|-------|
| <=0.5 | 4   | 4   | <=0.5 | >64  | 1     | <=0.25 | >64 | >2    |
| <=0.5 | 8   | 8   | <=0.5 | <=32 | >8    | <=0.25 | >64 | >2    |
| <=0.5 | 8   | 8   | <=0.5 | <=32 | <=0.5 | <=0.25 | >64 | >2    |
| <=0.5 | 4   | 4   | <=0.5 | <=32 | 1     | <=0.25 | <=4 | <=0.5 |
| <=0.5 | <=2 | 4   | <=0.5 | <=32 | 1     | <=0.25 | >64 | >2    |
| <=0.5 | <=2 | 4   | <=0.5 | <=32 | <=0.5 | <=0.25 | >64 | <=0.5 |
| <=0.5 | <=2 | 8   | <=0.5 | <=32 | 1     | <=0.25 | >64 | <=0.5 |
| <=0.5 | <=2 | 8   | <=0.5 | <=32 | <=0.5 | <=0.25 | >64 | >2    |
| <=0.5 | 16  | 8   | <=0.5 | <=32 | <=0.5 | <=0.25 | <=4 | <=0.5 |
| <=0.5 | 4   | 8   | <=0.5 | <=32 | <=0.5 | <=0.25 | >64 | <=0.5 |
| <=0.5 | <=2 | 2   | <=0.5 | <=32 | 2     | <=0.25 | <=4 | <=0.5 |
| <=0.5 | <=2 | 4   | <=0.5 | <=32 | 1     | <=0.25 | >64 | <=0.5 |
| <=0.5 | 4   | 4   | <=0.5 | <=32 | 1     | <=0.25 | <=4 | <=0.5 |
| <=0.5 | 4   | 4   | <=0.5 | 64   | 2     | <=0.25 | >64 | >2    |
| <=0.5 | 8   | 8   | <=0.5 | <=32 | 1     | <=0.25 | <=4 | <=0.5 |
| <=0.5 | 4   | 4   | <=0.5 | <=32 | >8    | <=0.25 | >64 | >2    |
| <=0.5 | 4   | 4   | <=0.5 | <=32 | 2     | 0.5    | >64 | <=0.5 |
| <=0.5 | >16 | >16 | 1     | <=32 | 4     | <=0.25 | >64 | >2    |
| <=0.5 | 4   | 8   | <=0.5 | <=32 | 1     | <=0.25 | <=4 | >2    |
| <=0.5 | 4   | 8   | <=0.5 | <=32 | <=0.5 | <=0.25 | >64 | >2    |
| <=0.5 | 8   | 4   | <=0.5 | <=32 | 1     | <=0.25 | >64 | >2    |
| 1     | >16 | >16 | >32   | <=32 | >8    | 0.5    | >64 | >2    |
| <=0.5 | <=2 | 4   | <=0.5 | <=32 | <=0.5 | <=0.25 | <=4 | <=0.5 |
| <=0.5 | <=2 | 4   | <=0.5 | <=32 | 1     | <=0.25 | >64 | <=0.5 |
| <=0.5 | >16 | >16 | 2     | <=32 | <=0.5 | 0.5    | 64  | >2    |
| <=0.5 | 8   | 8   | <=0.5 | <=32 | 1     | <=0.25 | >64 | <=0.5 |
| <=0.5 | 8   | 8   | <=0.5 | <=32 | 1     | <=0.25 | >64 | <=0.5 |
| 8     | >16 | >16 | >32   | 64   | 1     | 1      | >64 | >2    |
| <=0.5 | 4   | 4   | <=0.5 | <=32 | <=0.5 | <=0.25 | >64 | >2    |
| <=0.5 | 4   | 4   | <=0.5 | <=32 | >8    | <=0.25 | >64 | >2    |
| <=0.5 | 4   | 4   | <=0.5 | <=32 | 1     | <=0.25 | 8   | >2    |
| <=0.5 | <=2 | <=1 | <=0.5 | <=32 | <=0.5 | <=0.25 | >64 | <=0.5 |
| <=0.5 | 8   | 4   | <=0.5 | <=32 | 8     | <=0.25 | >64 | <=0.5 |
| <=0.5 | >16 | >16 | 32    | <=32 | >8    | 1      | 32  | >2    |
| <=0.5 | 16  | 16  | 2     | <=32 | 1     | <=0.25 | 32  | <=0.5 |
| <=0.5 | 4   | 4   | <=0.5 | <=32 | 2     | <=0.25 | >64 | >2    |
| <=0.5 | 4   | 8   | <=0.5 | <=32 | 8     | <=0.25 | >64 | >2    |
| <=0.5 | 4   | 8   | <=0.5 | <=32 | <=0.5 | <=0.25 | >64 | >2    |
| <=0.5 | 8   | 8   | <=0.5 | <=32 | 1     | 0.5    | <=4 | <=0.5 |
| <=0.5 | 4   | 4   | <=0.5 | <=32 | <=0.5 | <=0.25 | <=4 | <=0.5 |
| <=0.5 | <=2 | 8   | <=0.5 | <=32 | 8     | 0.5    | >64 | <=0.5 |
| >16   | >16 | >16 | >32   | <=32 | >8    | 1      | >64 | >2    |
| <=0.5 | 8   | 16  | <=0.5 | <=32 | 2     | <=0.25 | >64 | >2    |
| <=0.5 | 16  | 16  | 1     | >64  | 4     | <=0.25 | >64 | >2    |
| <=0.5 | 8   | 8   | <=0.5 | <=32 | 2     | <=0.25 | >64 | >2    |
| >16   | >16 | >16 | >32   | <=32 | >8    | 1      | >64 | >2    |
| <=0.5 | 4   | 8   | <=0.5 | <=32 | >8    | 0.5    | >64 | >2    |
| <=0.5 | 8   | 8   | <=0.5 | <=32 | 1     | <=0.25 | <=4 | <=0.5 |
| <=0.5 | 8   | 8   | <=0.5 | <=32 | 1     | <=0.25 | >64 | >2    |
| <=0.5 | 4   | 4   | <=0.5 | <=32 | 1     | <=0.25 | >64 | <=0.5 |
| <=0.5 | 4   | 8   | <=0.5 | <=32 | <=0.5 | <=0.25 | 8   | >2    |
| <=0.5 | 4   | 8   | <=0.5 | <=32 | <=0.5 | <=0.25 | >64 | >2    |
| 16    | 4   | >16 | >32   | <=32 | >8    | <=0.25 | >64 | <=0.5 |
| <=0.5 | 16  | 4   | <=0.5 | <=32 | >8    | <=0.25 | >64 | >2    |
| <=0.5 | 8   | 4   | <=0.5 | <=32 | <=0.5 | <=0.25 | >64 | >2    |
| <=0.5 | 4   | 4   | <=0.5 | <=32 | 1     | <=0.25 | <=4 | <=0.5 |
| <=0.5 | 4   | 4   | <=0.5 | <=32 | 1     | <=0.25 | <=4 | <=0.5 |
| <=0.5 | 4   | 4   | <=0.5 | <=32 | 8     | <=0.25 | >64 | >2    |
| <=0.5 | 4   | 4   | <=0.5 | <=32 | 1     | <=0.25 | <=4 | <=0.5 |
| <=0.5 | <=2 | 2   | <=0.5 | <=32 | 1     | <=0.25 | >64 | >2    |
| <=0.5 | 4   | 4   | <=0.5 | <=32 | >8    | <=0.25 | >64 | >2    |
| <=0.5 | 8   | 8   | <=0.5 | <=32 | <=0.5 | <=0.25 | <=4 | >2    |

|       |     |     |       |      |       |        |     |       |
|-------|-----|-----|-------|------|-------|--------|-----|-------|
| <=0.5 | >16 | >16 | 16    | 64   | >8    | <=0.25 | >64 | >2    |
| <=0.5 | 4   | 4   | <=0.5 | <=32 | 2     | <=0.25 | >64 | >2    |
| <=0.5 | 4   | 8   | <=0.5 | <=32 | 1     | <=0.25 | 32  | <=0.5 |
| <=0.5 | 4   | 4   | <=0.5 | <=32 | <=0.5 | <=0.25 | >64 | <=0.5 |
| <=0.5 | >16 | >16 | 16    | <=32 | >8    | 0.5    | >64 | >2    |
| <=0.5 | 8   | 8   | <=0.5 | >64  | >8    | 1      | >64 | >2    |
| <=0.5 | 4   | 4   | <=0.5 | <=32 | <=0.5 | <=0.25 | <=4 | <=0.5 |
| <=0.5 | 8   | 8   | <=0.5 | <=32 | >8    | <=0.25 | >64 | >2    |
| <=0.5 | 4   | 4   | <=0.5 | <=32 | <=0.5 | <=0.25 | <=4 | <=0.5 |
| <=0.5 | 8   | >16 | <=0.5 | <=32 | 2     | <=0.25 | 64  | >2    |
| <=0.5 | <=2 | 4   | <=0.5 | <=32 | 1     | <=0.25 | <=4 | <=0.5 |
| <=0.5 | <=2 | 4   | <=0.5 | <=32 | <=0.5 | <=0.25 | <=4 | <=0.5 |
| <=0.5 | 4   | 4   | <=0.5 | <=32 | 1     | <=0.25 | <=4 | <=0.5 |
| <=0.5 | <=2 | 4   | <=0.5 | <=32 | 1     | <=0.25 | >64 | >2    |
| <=0.5 | 4   | 4   | <=0.5 | <=32 | 8     | <=0.25 | >64 | >2    |
| <=0.5 | <=2 | 4   | <=0.5 | <=32 | >8    | <=0.25 | >64 | >2    |
| <=0.5 | <=2 | 4   | <=0.5 | <=32 | <=0.5 | <=0.25 | <=4 | <=0.5 |
| <=0.5 | 4   | 8   | <=0.5 | <=32 | 1     | 0.5    | >64 | <=0.5 |
| <=0.5 | 8   | 4   | <=0.5 | <=32 | 8     | <=0.25 | <=4 | <=0.5 |
| >16   | 8   | >16 | >32   | 64   | >8    | <=0.25 | >64 | >2    |
| <=0.5 | 4   | 4   | <=0.5 | <=32 | 1     | <=0.25 | >64 | <=0.5 |
| <=0.5 | <=2 | 2   | <=0.5 | <=32 | 1     | <=0.25 | >64 | <=0.5 |
| 16    | 8   | >16 | >32   | <=32 | >8    | <=0.25 | >64 | >2    |
| <=0.5 | <=2 | 2   | <=0.5 | <=32 | <=0.5 | <=0.25 | <=4 | <=0.5 |
| <=0.5 | 4   | 4   | <=0.5 | <=32 | <=0.5 | <=0.25 | <=4 | <=0.5 |
| <=0.5 | <=2 | 4   | <=0.5 | <=32 | 1     | <=0.25 | >64 | >2    |
| <=0.5 | 4   | 4   | <=0.5 | <=32 | 2     | <=0.25 | >64 | <=0.5 |
| <=0.5 | 4   | 4   | <=0.5 | <=32 | <=0.5 | <=0.25 | <=4 | >2    |
| <=0.5 | 8   | 8   | <=0.5 | <=32 | 1     | <=0.25 | <=4 | <=0.5 |
| <=0.5 | 8   | 16  | <=0.5 | <=32 | 1     | <=0.25 | >64 | <=0.5 |
| <=0.5 | 4   | 4   | <=0.5 | <=32 | >8    | <=0.25 | >64 | >2    |
| <=0.5 | 4   | 8   | <=0.5 | <=32 | <=0.5 | <=0.25 | >64 | <=0.5 |
| <=0.5 | 4   | 4   | <=0.5 | <=32 | 1     | <=0.25 | <=4 | <=0.5 |
| <=0.5 | >16 | >16 | <=0.5 | <=32 | <=0.5 | <=0.25 | >64 | >2    |
| <=0.5 | 16  | 16  | 4     | <=32 | 2     | 0.5    | 32  | <=0.5 |
| <=0.5 | <=2 | 2   | <=0.5 | <=32 | 1     | <=0.25 | <=4 | <=0.5 |
| <=0.5 | 4   | 4   | <=0.5 | <=32 | <=0.5 | <=0.25 | >64 | >2    |
| <=0.5 | <=2 | 4   | <=0.5 | <=32 | 8     | <=0.25 | >64 | >2    |
| <=0.5 | <=2 | 4   | <=0.5 | <=32 | 1     | <=0.25 | >64 | >2    |
| <=0.5 | 4   | 8   | <=0.5 | <=32 | <=0.5 | <=0.25 | <=4 | <=0.5 |
| <=0.5 | 4   | 4   | <=0.5 | <=32 | 8     | <=0.25 | >64 | >2    |
| <=0.5 | 4   | 4   | <=0.5 | <=32 | <=0.5 | <=0.25 | >64 | >2    |
| <=0.5 | 4   | 4   | <=0.5 | >64  | <=0.5 | <=0.25 | >64 | >2    |
| <=0.5 | >16 | 16  | <=0.5 | <=32 | 2     | <=0.25 | <=4 | >2    |
| <=0.5 | 4   | 4   | <=0.5 | <=32 | 1     | <=0.25 | >64 | <=0.5 |
| <=0.5 | 4   | 4   | <=0.5 | <=32 | >8    | <=0.25 | >64 | >2    |
| <=0.5 | 8   | 8   | <=0.5 | 64   | >8    | <=0.25 | >64 | >2    |
| <=0.5 | <=2 | <=1 | <=0.5 | <=32 | <=0.5 | <=0.25 | <=4 | <=0.5 |
| <=0.5 | 4   | 4   | <=0.5 | 64   | 1     | <=0.25 | >64 | >2    |
| <=0.5 | 8   | 8   | <=0.5 | <=32 | >8    | <=0.25 | >64 | >2    |
| <=0.5 | <=2 | 4   | <=0.5 | <=32 | 1     | <=0.25 | <=4 | <=0.5 |
| <=0.5 | <=2 | 4   | <=0.5 | <=32 | 1     | <=0.25 | >64 | >2    |
| <=0.5 | 4   | 4   | <=0.5 | <=32 | >8    | <=0.25 | >64 | >2    |
| <=0.5 | <=2 | 8   | <=0.5 | <=32 | 1     | <=0.25 | >64 | >2    |
| <=0.5 | <=2 | 4   | <=0.5 | <=32 | <=0.5 | <=0.25 | >64 | >2    |
| <=0.5 | 8   | 8   | <=0.5 | <=32 | 1     | <=0.25 | <=4 | <=0.5 |
| <=0.5 | <=2 | 2   | <=0.5 | <=32 | <=0.5 | <=0.25 | <=4 | <=0.5 |
| <=0.5 | 4   | 4   | <=0.5 | <=32 | 1     | <=0.25 | <=4 | <=0.5 |
| <=0.5 | <=2 | 2   | <=0.5 | <=32 | <=0.5 | <=0.25 | <=4 | <=0.5 |
| <=0.5 | 4   | 4   | <=0.5 | <=32 | 1     | <=0.25 | >64 | <=0.5 |
| <=0.5 | <=2 | 4   | <=0.5 | <=32 | <=0.5 | <=0.25 | >64 | >2    |

|        |       |     |       |       |       |        |        |       |       |
|--------|-------|-----|-------|-------|-------|--------|--------|-------|-------|
| <=0.5  | 4     | 8   | <=0.5 | <=32  | >8    | <=0.25 | >64    | >2    |       |
| <=0.5  | 4     | 4   | <=0.5 | <=32  | >8    | <=0.25 | >64    | >2    |       |
| <=0.5  | <=2   | 4   | <=0.5 | <=32  | <=0.5 | <=0.25 | >64    | >2    |       |
| <=0.5  | <=2   | 4   | <=0.5 | <=32  | <=0.5 | <=0.25 | >64    | >2    |       |
| <=0.5  | 4     | 8   | <=0.5 | <=32  | <=0.5 | <=0.25 | >64    | >2    |       |
| <=0.5  | >16   | 16  | <=0.5 | <=32  | >8    | <=0.25 | >64    | >2    |       |
| <=0.5  | 4     | 8   | <=0.5 | <=32  | 2     | <=0.25 | >64    | <=0.5 |       |
| <=0.5  | 8     | 8   | <=0.5 | <=32  | >8    | <=0.25 | >64    | >2    |       |
| <=0.5  | 4     | 4   | <=0.5 | <=32  | 1     | <=0.25 | <=4    | <=0.5 |       |
| <=0.5  | 4     | 4   | <=0.5 | <=32  | <=0.5 | <=0.25 | >64    | <=0.5 |       |
| <=0.5  | 8     | 4   | <=0.5 | <=32  | >8    | <=0.25 | >64    | >2    |       |
| <=0.5  | 4     | 8   | <=0.5 | <=32  | >8    | <=0.25 | >64    | >2    |       |
| <=0.5  | 16    | 8   | <=0.5 | 64    | >8    | <=0.25 | >64    | >2    |       |
| <=0.5  | 4     | 4   | <=0.5 | <=32  | <=0.5 | <=0.25 | >64    | >2    |       |
| <=0.5  | 8     | 8   | <=0.5 | <=32  | >8    | <=0.25 | >64    | >2    |       |
| <=0.5  | >16   | >16 | 16    | 64    | 8     | <=0.25 | 32     | <=0.5 |       |
| <=0.5  | <=2   | 2   | <=0.5 | <=32  | <=0.5 | <=0.25 | >64    | <=0.5 |       |
| <=0.5  | 4     | 4   | <=0.5 | <=32  | 1     | <=0.25 | <=4    | <=0.5 |       |
| <=0.5  | 4     | 4   | <=0.5 | <=32  | 1     | <=0.25 | >64    | >2    |       |
| <=0.5  | <=2   | 2   | <=0.5 | 64    | <=0.5 | <=0.25 | >64    | >2    |       |
| <=0.5  | 4     | 2   | <=0.5 | <=32  | 2     | <=0.25 | <=4    | <=0.5 |       |
| <=0.5  | <=2   | 4   | <=0.5 | <=32  | <=0.5 | <=0.25 | <=4    | <=0.5 |       |
| 8      | 16    | >16 | >32   | <=32  | <=0.5 | <=0.25 | >64    | >2    |       |
| <=0.5  | 4     | 4   | <=0.5 | <=32  | 1     | <=0.25 | >64    | <=0.5 |       |
| <=0.5  | 4     | 4   | <=0.5 | <=32  | 1     | <=0.25 | >64    | <=0.5 |       |
| <=0.5  | 4     | 4   | <=0.5 | <=32  | <=0.5 | <=0.25 | >64    | <=0.5 |       |
| <=0.5  | 4     | 2   | <=0.5 | <=32  | >8    | <=0.25 | >64    | >2    |       |
| 1      | >16   | >16 | 32    | <=32  | >8    | 0.5    | >64    | >2    |       |
| <=0.5  | <=2   | 2   | <=0.5 | <=32  | 1     | <=0.25 | >64    | <=0.5 |       |
| <=0.5  | <=2   | 2   | <=0.5 | <=32  | 8     | <=0.25 | >64    | >2    |       |
| <=0.5  | 8     | 16  | <=0.5 | >64   | <=0.5 | <=0.25 | >64    | >2    |       |
| <=0.5  | 4     | 8   | <=0.5 | <=32  | <=0.5 | <=0.25 | >64    | >2    |       |
| <=0.5  | <=2   | 4   | <=0.5 | <=32  | >8    | <=0.25 | <=4    | >2    |       |
| <=0.5  | 4     | 4   | <=0.5 | <=32  | 1     | <=0.25 | >64    | >2    |       |
| <=0.5  | 4     | 4   | <=0.5 | <=32  | <=0.5 | <=0.25 | <=4    | <=0.5 |       |
| <=0.5  | 4     | 4   | <=0.5 | <=32  | <=0.5 | <=0.25 | >64    | <=0.5 |       |
| <=0.5  | <=2   | 4   | <=0.5 | <=32  | <=0.5 | <=0.25 | <=4    | <=0.5 |       |
| <=0.5  | 4     | 4   | <=0.5 | <=32  | <=0.5 | <=0.25 | <=4    | <=0.5 |       |
| <=0.5  | >16   | 8   | <=0.5 | >64   | 4     | <=0.25 | 32     | <=0.5 |       |
| <=0.5  | 4     | 4   | <=0.5 | <=32  | <=0.5 | <=0.25 | <=4    | <=0.5 |       |
| <=0.5  | 4     | 8   | <=0.5 | <=32  | >8    | <=0.25 | >64    | >2    |       |
| <=0.5  | 8     | 8   | <=0.5 | <=32  | >8    | <=0.25 | >64    | >2    |       |
| <=0.5  | 4     | 4   | <=0.5 | <=32  | <=0.5 | <=0.25 | >64    | <=0.5 |       |
| <=0.5  | 4     | 8   | <=0.5 | <=32  | <=0.5 | <=0.25 | >64    | >2    |       |
| <=0.5  | 8     | 8   | <=0.5 | <=32  | 1     | <=0.25 | <=4    | <=0.5 |       |
| <=0.5  | 4     | 4   | <=0.5 | <=32  | 2     | <=0.25 | >64    | <=0.5 |       |
| <=0.5  | 8     | 4   | <=0.5 | >64   | <=0.5 | <=0.25 | >64    | >2    |       |
| <=0.5  | >16   | >16 | 8     | 64    | 1     | <=0.25 | >64    | <=0.5 |       |
| <=0.5  | 4     | 16  | <=0.5 | <=32  | 1     | <=0.25 | 64     | >2    |       |
| <=0.5  | 8     | 4   | <=0.5 | <=32  | 1     | <=0.25 | >64    | >2    |       |
| <=0.5  | 4     | 8   | <=0.5 | <=32  | 1     | <=0.25 | <=4    | >2    |       |
| <=0.5  | <=2   | 4   | <=0.5 | <=32  | 1     | <=0.25 | <=4    | <=0.5 |       |
| <=0.5  | 4     | 2   | <=0.5 | <=32  | 1     | <=0.25 | >64    | >2    |       |
| <=0.5  | 8     | 8   | <=0.5 | >64   | 2     | <=0.25 | <=4    | >2    |       |
| <=0.5  | >16   | 16  | <=0.5 | 64    | 2     | <=0.25 | <=4    | <=0.5 |       |
| <=0.25 | <=0.5 | 4   | 4     | <=0.5 | <=32  | 1      | <=0.25 | >64   | <=0.5 |
| <=0.5  | 8     | 8   | <=0.5 | <=32  | 1     | <=0.25 | <=4    | >2    |       |
| <=0.5  | 8     | 4   | <=0.5 | 64    | >8    | <=0.25 | 64     | >2    |       |
| <=0.5  | 8     | 8   | <=0.5 | <=32  | >8    | <=0.25 | >64    | >2    |       |
| <=0.5  | <=2   | 4   | <=0.5 | <=32  | 8     | <=0.25 | >64    | <=0.5 |       |
| <=0.5  | 8     | 4   | <=0.5 | <=32  | >8    | <=0.25 | >64    | >2    |       |











|       |     |     |       |      |       |        |     |       |
|-------|-----|-----|-------|------|-------|--------|-----|-------|
| <=0.5 | 8   | 4   | <=0.5 | <=32 | 2     | <=0.25 | >64 | >2    |
| <=0.5 | >16 | >16 | 32    | <=32 | >8    | <=0.25 | >64 | <=0.5 |
| <=0.5 | 4   | 4   | <=0.5 | <=32 | >8    | <=0.25 | >64 | >2    |
| >16   | 8   | >16 | >32   | <=32 | 1     | <=0.25 | >64 | <=0.5 |
| <=0.5 | 8   | 16  | <=0.5 | <=32 | 2     | <=0.25 | >64 | >2    |
| <=0.5 | >16 | >16 | 16    | >64  | >8    | <=0.25 | 64  | >2    |
| <=0.5 | 4   | 4   | <=0.5 | <=32 | >8    | <=0.25 | >64 | >2    |
| <=0.5 | 4   | 4   | <=0.5 | <=32 | 1     | <=0.25 | <=4 | <=0.5 |
| <=0.5 | 8   | 8   | <=0.5 | <=32 | 2     | <=0.25 | >64 | <=0.5 |
| <=0.5 | 16  | 8   | <=0.5 | <=32 | 1     | <=0.25 | 32  | >2    |
| <=0.5 | 8   | 8   | <=0.5 | <=32 | 1     | <=0.25 | >64 | >2    |
| <=0.5 | 8   | 8   | <=0.5 | <=32 | 4     | <=0.25 | >64 | >2    |
| <=0.5 | 4   | 4   | <=0.5 | <=32 | 1     | <=0.25 | <=4 | >2    |
| <=0.5 | <=2 | 4   | <=0.5 | <=32 | <=0.5 | <=0.25 | >64 | >2    |
| <=0.5 | 8   | 4   | <=0.5 | <=32 | >8    | <=0.25 | >64 | >2    |
| <=0.5 | 8   | >16 | 4     | <=32 | >8    | <=0.25 | >64 | >2    |
| <=0.5 | 4   | 4   | 1     | <=32 | 2     | <=0.25 | <=4 | <=0.5 |
| <=0.5 | 4   | 4   | <=0.5 | <=32 | 1     | <=0.25 | <=4 | >2    |
| <=0.5 | 8   | 4   | <=0.5 | <=32 | <=0.5 | <=0.25 | >64 | >2    |
| <=0.5 | 4   | 4   | <=0.5 | <=32 | 2     | <=0.25 | >64 | <=0.5 |
| <=0.5 | 4   | 2   | <=0.5 | 64   | <=0.5 | <=0.25 | <=4 | <=0.5 |
| <=0.5 | 4   | 2   | <=0.5 | >64  | 1     | <=0.25 | 64  | >2    |
| <=0.5 | 4   | 8   | <=0.5 | <=32 | <=0.5 | <=0.25 | >64 | >2    |
| 1     | >16 | >16 | 32    | <=32 | >8    | 0.5    | >64 | >2    |
| <=0.5 | 4   | 4   | <=0.5 | <=32 | 1     | <=0.25 | <=4 | >2    |
| <=0.5 | 4   | 4   | <=0.5 | <=32 | 2     | <=0.25 | <=4 | <=0.5 |
| <=0.5 | <=2 | 2   | <=0.5 | <=32 | 1     | <=0.25 | <=4 | <=0.5 |
| 1     | >16 | >16 | 16    | >64  | >8    | 0.5    | >64 | >2    |
| <=0.5 | >16 | >16 | 8     | <=32 | >8    | <=0.25 | >64 | >2    |
| <=0.5 | 4   | 8   | <=0.5 | <=32 | >8    | <=0.25 | >64 | >2    |
| <=0.5 | 8   | 8   | <=0.5 | <=32 | >8    | <=0.25 | >64 | >2    |
| <=0.5 | 4   | 4   | <=0.5 | <=32 | 2     | <=0.25 | <=4 | <=0.5 |
| <=0.5 | 4   | 2   | <=0.5 | <=32 | 1     | <=0.25 | <=4 | <=0.5 |
| <=0.5 | <=2 | 4   | <=0.5 | <=32 | >8    | <=0.25 | >64 | >2    |
| <=0.5 | 4   | 4   | <=0.5 | <=32 | <=0.5 | <=0.25 | <=4 | <=0.5 |
| <=0.5 | 8   | 4   | <=0.5 | <=32 | <=0.5 | <=0.25 | <=4 | <=0.5 |
| <=0.5 | 4   | 4   | <=0.5 | <=32 | >8    | <=0.25 | >64 | <=0.5 |
| <=0.5 | 4   | 4   | <=0.5 | <=32 | 1     | <=0.25 | <=4 | >2    |
| <=0.5 | <=2 | 4   | <=0.5 | <=32 | 1     | <=0.25 | 16  | >2    |
| <=0.5 | 4   | 4   | <=0.5 | <=32 | <=0.5 | <=0.25 | 64  | <=0.5 |
| <=0.5 | <=2 | 8   | <=0.5 | <=32 | >8    | <=0.25 | >64 | <=0.5 |
| <=0.5 | <=2 | 2   | <=0.5 | <=32 | <=0.5 | <=0.25 | 64  | >2    |
| <=0.5 | 4   | 4   | <=0.5 | <=32 | 8     | <=0.25 | 8   | 1     |
| <=0.5 | 4   | 4   | <=0.5 | <=32 | 1     | <=0.25 | >64 | <=0.5 |
| <=0.5 | <=2 | 2   | <=0.5 | <=32 | 1     | <=0.25 | >64 | <=0.5 |
| <=0.5 | 4   | 8   | <=0.5 | <=32 | >8    | <=0.25 | 64  | <=0.5 |
| <=0.5 | 4   | 8   | <=0.5 | <=32 | 2     | <=0.25 | >64 | >2    |
| <=0.5 | 4   | 8   | <=0.5 | <=32 | >8    | <=0.25 | >64 | >2    |
| <=0.5 | 4   | 8   | <=0.5 | <=32 | <=0.5 | <=0.25 | >64 | >2    |
| <=0.5 | 4   | 4   | <=0.5 | <=32 | 1     | <=0.25 | <=4 | <=0.5 |
| <=0.5 | <=2 | 4   | <=0.5 | <=32 | <=0.5 | <=0.25 | 64  | <=0.5 |
| <=0.5 | 4   | 4   | <=0.5 | <=32 | >8    | <=0.25 | 64  | >2    |
| <=0.5 | 4   | 8   | <=0.5 | <=32 | >8    | <=0.25 | 64  | >2    |
| <=0.5 | <=2 | 4   | <=0.5 | <=32 | 8     | <=0.25 | >64 | >2    |
| <=0.5 | 4   | 8   | <=0.5 | <=32 | >8    | <=0.25 | 64  | >2    |
| 1     | 8   | 16  | <=0.5 | <=32 | <=0.5 | <=0.25 | >64 | <=0.5 |
| <=0.5 | <=2 | 4   | <=0.5 | <=32 | <=0.5 | <=0.25 | >64 | <=0.5 |
| <=0.5 | 4   | 4   | <=0.5 | <=32 | <=0.5 | <=0.25 | <=4 | <=0.5 |
| 1     | 4   | 16  | <=0.5 | <=32 | <=0.5 | <=0.25 | 64  | <=0.5 |
| <=0.5 | <=2 | 4   | <=0.5 | <=32 | 1     | 0.5    | >64 | >2    |
| <=0.5 | 8   | 8   | <=0.5 | 64   | >8    | <=0.25 | >64 | >2    |





|       |     |     |       |      |       |        |     |       |
|-------|-----|-----|-------|------|-------|--------|-----|-------|
| <=0.5 | 4   | 8   | <=0.5 | <=32 | 1     | <=0.25 | >64 | <=0.5 |
| <=0.5 | 4   | 8   | <=0.5 | <=32 | 1     | <=0.25 | >64 | <=0.5 |
| <=0.5 | <=2 | 4   | <=0.5 | <=32 | 1     | <=0.25 | <=4 | <=0.5 |
| <=0.5 | <=2 | 4   | <=0.5 | <=32 | 1     | <=0.25 | <=4 | <=0.5 |
| <=0.5 | <=2 | <=1 | <=0.5 | <=32 | <=0.5 | <=0.25 | <=4 | <=0.5 |
| <=0.5 | <=2 | 4   | <=0.5 | <=32 | 1     | <=0.25 | >64 | >4    |
| <=0.5 | 4   | 4   | <=0.5 | <=32 | >8    | <=0.25 | >64 | <=0.5 |
| <=0.5 | <=2 | 8   | <=0.5 | <=32 | <=0.5 | <=0.25 | <=4 | <=0.5 |
| <=0.5 | 4   | 4   | <=0.5 | <=32 | 2     | <=0.25 | <=4 | <=0.5 |
| <=0.5 | 4   | 2   | <=0.5 | <=32 | 2     | <=0.25 | <=4 | <=0.5 |
| <=0.5 | <=2 | 4   | <=0.5 | <=32 | 1     | <=0.25 | <=4 | <=0.5 |
| <=0.5 | 4   | 4   | <=0.5 | <=32 | 2     | <=0.25 | >64 | >4    |
| <=0.5 | <=2 | 4   | <=0.5 | <=32 | <=0.5 | 0.5    | <=4 | >4    |
| <=0.5 | 4   | 4   | <=0.5 | <=32 | <=0.5 | <=0.25 | >64 | >4    |
| <=0.5 | 8   | 4   | <=0.5 | <=32 | >8    | <=0.25 | 32  | >4    |
| <=0.5 | 4   | 4   | <=0.5 | <=32 | 2     | <=0.25 | >64 | <=0.5 |
| <=0.5 | 4   | 8   | <=0.5 | <=32 | >8    | <=0.25 | >64 | >4    |
| <=0.5 | 4   | 4   | <=0.5 | <=32 | <=0.5 | <=0.25 | >64 | >4    |
| <=0.5 | <=2 | 8   | <=0.5 | <=32 | 1     | <=0.25 | <=4 | <=0.5 |
| <=0.5 | 4   | 8   | <=0.5 | <=32 | >8    | <=0.25 | >64 | >4    |
| <=0.5 | 8   | 8   | <=0.5 | <=32 | 1     | <=0.25 | <=4 | >4    |
| <=0.5 | 4   | 4   | <=0.5 | <=32 | 1     | <=0.25 | <=4 | <=0.5 |
| <=0.5 | 4   | 4   | <=0.5 | <=32 | 1     | <=0.25 | <=4 | >4    |
| <=0.5 | 4   | 8   | <=0.5 | <=32 | 1     | <=0.25 | >64 | <=0.5 |
| <=0.5 | <=2 | 4   | <=0.5 | <=32 | 1     | <=0.25 | >64 | <=0.5 |
| <=0.5 | 8   | 4   | <=0.5 | <=32 | 1     | <=0.25 | >64 | <=0.5 |
| <=0.5 | 4   | 4   | <=0.5 | <=32 | <=0.5 | <=0.25 | <=4 | <=0.5 |
| <=0.5 | 8   | 8   | <=0.5 | <=32 | <=0.5 | <=0.25 | >64 | >2    |
| <=0.5 | >16 | >16 | 32    | <=32 | >8    | <=0.25 | >64 | >2    |
| <=0.5 | 4   | 4   | <=0.5 | <=32 | 2     | <=0.25 | >64 | <=0.5 |
| <=0.5 | <=2 | 16  | <=0.5 | <=32 | 2     | 0.5    | >64 | <=0.5 |
| <=0.5 | 8   | 8   | <=0.5 | <=32 | <=0.5 | <=0.25 | >64 | >2    |
| <=0.5 | 16  | 16  | <=0.5 | <=32 | 1     | <=0.25 | <=4 | >2    |
| <=0.5 | 4   | 4   | <=0.5 | <=32 | 4     | <=0.25 | >64 | >2    |
| <=0.5 | 4   | 8   | <=0.5 | <=32 | <=0.5 | <=0.25 | >64 | >2    |
| <=0.5 | 4   | 2   | <=0.5 | <=32 | <=0.5 | <=0.25 | >64 | <=0.5 |
| <=0.5 | 4   | <=1 | <=0.5 | <=32 | <=0.5 | <=0.25 | 64  | <=0.5 |
| <=0.5 | <=2 | 4   | <=0.5 | <=32 | 8     | <=0.25 | >64 | >4    |
| <=0.5 | 4   | 8   | <=0.5 | <=32 | 2     | <=0.25 | >64 | >2    |
| >16   | 8   | >16 | >32   | <=32 | 1     | <=0.25 | >64 | <=0.5 |
| <=0.5 | >16 | >16 | 8     | <=32 | >8    | <=0.25 | >64 | >2    |
| <=0.5 | 4   | 4   | <=0.5 | <=32 | 1     | <=0.25 | <=4 | <=0.5 |
| <=0.5 | <=2 | 8   | <=0.5 | <=32 | <=0.5 | <=0.25 | <=4 | >2    |
| <=0.5 | <=2 | 4   | <=0.5 | <=32 | >8    | <=0.25 | <=4 | >2    |
| <=0.5 | 4   | 4   | <=0.5 | <=32 | <=0.5 | <=0.25 | <=4 | <=0.5 |
| <=0.5 | <=2 | 2   | <=0.5 | <=32 | >8    | <=0.25 | >64 | >2    |
| <=0.5 | 8   | 4   | 1     | <=32 | 1     | <=0.25 | >64 | <=0.5 |
| <=0.5 | <=2 | 4   | <=0.5 | <=32 | 1     | <=0.25 | >64 | <=0.5 |
| <=0.5 | 4   | 8   | <=0.5 | <=32 | 1     | <=0.25 | >64 | <=0.5 |
| <=0.5 | 4   | 4   | <=0.5 | <=32 | 8     | <=0.25 | >64 | >2    |
| <=0.5 | <=2 | 2   | <=0.5 | <=32 | <=0.5 | <=0.25 | <=4 | <=0.5 |
| <=0.5 | 4   | 4   | <=0.5 | <=32 | 4     | <=0.25 | <=4 | <=0.5 |
| 1     | >16 | >16 | 32    | 64   | >8    | 0.5    | >64 | >2    |
| <=0.5 | 8   | 16  | <=0.5 | <=32 | >8    | <=0.25 | >64 | >2    |
| <=0.5 | 4   | 4   | <=0.5 | <=32 | <=0.5 | <=0.25 | >64 | <=0.5 |
| <=0.5 | <=2 | 8   | <=0.5 | <=32 | 2     | <=0.25 | >64 | >2    |
| 2     | >16 | >16 | >32   | <=32 | >8    | 1      | >64 | >2    |
| <=0.5 | 8   | 4   | <=0.5 | <=32 | >8    | <=0.25 | >64 | >2    |
| <=0.5 | <=2 | 2   | <=0.5 | <=32 | 1     | <=0.25 | >64 | <=0.5 |
| <=0.5 | 4   | 8   | <=0.5 | <=32 | >8    | <=0.25 | >64 | >2    |
| <=0.5 | 4   | 8   | <=0.5 | <=32 | <=0.5 | <=0.25 | >64 | >2    |



|        |       |     |       |       |       |        |        |       |        |
|--------|-------|-----|-------|-------|-------|--------|--------|-------|--------|
| <=0.5  | <=2   | 4   | <=0.5 | <=32  | <=0.5 | <=0.25 | >64    | <=0.5 |        |
| <=0.5  | <=2   | 4   | <=0.5 | <=32  | 1     | <=0.25 | <=4    | >2    |        |
| <=0.5  | 16    | 4   | <=0.5 | <=32  | >8    | <=0.25 | 64     | >2    |        |
| <=0.5  | 4     | 4   | <=0.5 | <=32  | 1     | <=0.25 | <=4    | >2    |        |
| <=0.5  | <=2   | 2   | <=0.5 | <=32  | 1     | <=0.25 | >64    | <=0.5 |        |
| <=0.5  | 4     | 4   | <=0.5 | <=32  | 2     | <=0.25 | >64    | <=0.5 |        |
| <=0.5  | <=2   | 4   | <=0.5 | <=32  | <=0.5 | <=0.25 | >64    | >2    |        |
| <=0.5  | 4     | 4   | <=0.5 | <=32  | 1     | <=0.25 | >64    | <=0.5 |        |
| <=0.5  | 4     | 4   | <=0.5 | <=32  | 1     | <=0.25 | <=4    | >2    |        |
| <=0.5  | 8     | 4   | <=0.5 | <=32  | 1     | <=0.25 | <=4    | <=0.5 |        |
| <=0.5  | 8     | 4   | <=0.5 | <=32  | 2     | <=0.25 | <=4    | <=0.5 |        |
| <=0.5  | 4     | 4   | <=0.5 | <=32  | <=0.5 | <=0.25 | <=4    | <=0.5 |        |
| <=0.5  | 4     | 8   | <=0.5 | <=32  | 1     | <=0.25 | >64    | <=0.5 |        |
| <=0.5  | 4     | 4   | <=0.5 | <=32  | 1     | <=0.25 | <=4    | <=0.5 |        |
| <=0.5  | <=2   | 4   | <=0.5 | <=32  | 1     | <=0.25 | <=4    | <=0.5 |        |
| <=0.5  | <=2   | 4   | <=0.5 | <=32  | 1     | <=0.25 | <=4    | <=0.5 |        |
| <=0.5  | 8     | 4   | <=0.5 | <=32  | >8    | <=0.25 | >64    | >2    |        |
| <=0.5  | 8     | 4   | <=0.5 | <=32  | 1     | <=0.25 | 64     | >2    |        |
| <=0.5  | 4     | 4   | <=0.5 | <=32  | <=0.5 | <=0.25 | >64    | <=0.5 |        |
| 8      | 4     | >16 | 2     | <=32  | 1     | <=0.25 | >64    | >2    |        |
| <=0.5  | 4     | 4   | <=0.5 | <=32  | 1     | <=0.25 | <=4    | <=0.5 |        |
| <=0.5  | <=2   | 8   | <=0.5 | <=32  | <=0.5 | <=0.25 | 64     | >2    |        |
| >16    | >16   | >16 | >32   | <=32  | >8    | <=0.25 | >64    | <=0.5 |        |
| <=0.5  | 4     | 8   | <=0.5 | <=32  | 1     | <=0.25 | <=4    | <=0.5 |        |
| <=0.5  | 8     | 4   | <=0.5 | <=32  | 1     | <=0.25 | >64    | <=0.5 |        |
| <=0.5  | <=2   | 2   | <=0.5 | <=32  | <=0.5 | <=0.25 | >64    | >2    |        |
| 4      | 8     | >16 | >32   | <=32  | >8    | <=0.25 | >64    | >2    |        |
| <=0.5  | <=2   | 4   | <=0.5 | <=32  | <=0.5 | <=0.25 | <=4    | <=0.5 |        |
| <=0.5  | 4     | 2   | <=0.5 | <=32  | <=0.5 | <=0.25 | 16     | >2    |        |
| <=0.5  | <=2   | 16  | <=0.5 | <=32  | <=0.5 | <=0.25 | 64     | <=0.5 |        |
| <=0.5  | 8     | 4   | <=0.5 | <=32  | >8    | <=0.25 | >64    | >2    |        |
| <=0.5  | <=2   | 4   | <=0.5 | <=32  | <=0.5 | <=0.25 | >64    | <=0.5 |        |
| <=0.5  | <=2   | 4   | <=0.5 | <=32  | 1     | <=0.25 | 64     | <=0.5 |        |
| <=0.5  | 4     | 4   | <=0.5 | <=32  | 2     | <=0.25 | <=4    | <=0.5 |        |
| <=0.5  | 4     | 4   | <=0.5 | <=32  | >8    | <=0.25 | >64    | >2    |        |
| <=0.25 | <=0.5 | 8   | 8     | <=0.5 | <=32  | 4      | <=0.25 | 16    | <=0.25 |
| <=0.5  | <=2   | 4   | <=0.5 | <=32  | <=0.5 | <=0.25 | 64     | >2    |        |
| <=0.5  | <=2   | 4   | <=0.5 | <=32  | <=0.5 | <=0.25 | <=4    | <=0.5 |        |
| <=0.5  | 4     | 4   | <=0.5 | <=32  | 1     | <=0.25 | >64    | >2    |        |
| <=0.5  | <=2   | 4   | <=0.5 | <=32  | 1     | <=0.25 | <=4    | <=0.5 |        |
| <=0.5  | 8     | 8   | <=0.5 | <=32  | >8    | <=0.25 | 64     | <=0.5 |        |
| <=0.5  | 4     | 4   | <=0.5 | <=32  | 8     | <=0.25 | >64    | >2    |        |
| <=0.5  | 8     | 8   | <=0.5 | <=32  | >8    | <=0.25 | >64    | >2    |        |
| <=0.5  | 4     | 4   | <=0.5 | <=32  | >8    | <=0.25 | >64    | >2    |        |
| <=0.5  | 8     | 4   | <=0.5 | <=32  | 2     | <=0.25 | 8      | <=0.5 |        |
| <=0.5  | <=2   | 2   | <=0.5 | <=32  | <=0.5 | <=0.25 | >64    | >4    |        |
| <=0.5  | <=2   | 8   | <=0.5 | <=32  | <=0.5 | <=0.25 | <=4    | <=0.5 |        |
| 2      | >16   | >16 | >32   | 64    | >8    | 0.5    | >64    | >4    |        |
| <=0.5  | <=2   | 4   | <=0.5 | <=32  | 2     | <=0.25 | <=4    | <=0.5 |        |
| <=0.5  | 8     | 8   | <=0.5 | <=32  | >8    | <=0.25 | >64    | >4    |        |
| <=0.5  | 4     | 4   | <=0.5 | <=32  | 1     | <=0.25 | <=4    | <=0.5 |        |
| <=0.5  | <=2   | 8   | <=0.5 | <=32  | >8    | <=0.25 | >64    | >4    |        |
| <=0.5  | 8     | 8   | <=0.5 | <=32  | <=0.5 | <=0.25 | >64    | >4    |        |
| <=0.5  | 4     | 4   | <=0.5 | <=32  | <=0.5 | <=0.25 | <=4    | >4    |        |
| <=0.5  | 4     | 4   | <=0.5 | <=32  | <=0.5 | <=0.25 | <=4    | <=0.5 |        |
| <=0.5  | <=2   | 2   | <=0.5 | <=32  | >8    | <=0.25 | >64    | >4    |        |
| <=0.5  | 4     | 4   | <=0.5 | <=32  | 2     | <=0.25 | 32     | >4    |        |
| <=0.5  | 4     | 4   | <=0.5 | <=32  | 1     | <=0.25 | >64    | <=0.5 |        |
| <=0.5  | 16    | 16  | 4     | <=32  | <=0.5 | <=0.25 | >64    | >4    |        |
| <=0.5  | 8     | 8   | <=0.5 | <=32  | >8    | <=0.25 | 64     | >4    |        |
| 4      | >16   | >16 | >32   | <=32  | <=0.5 | 1      | >64    | <=0.5 |        |

|       |     |     |       |      |       |        |     |       |
|-------|-----|-----|-------|------|-------|--------|-----|-------|
| 4     | 16  | >16 | 32    | <=32 | >8    | <=0.25 | >64 | <=0.5 |
| >16   | >16 | >16 | >32   | <=32 | >8    | 1      | >64 | >2    |
| <=0.5 | 4   | 4   | <=0.5 | <=32 | 2     | <=0.25 | <=4 | <=0.5 |
| 4     | >16 | >16 | >32   | <=32 | >8    | <=0.25 | >64 | >2    |
| <=0.5 | >16 | >16 | 8     | <=32 | <=0.5 | 0.5    | 32  | >2    |
| <=0.5 | <=2 | 4   | <=0.5 | <=32 | >8    | <=0.25 | >64 | <=0.5 |
| <=0.5 | 4   | 4   | <=0.5 | <=32 | <=0.5 | <=0.25 | >64 | <=0.5 |
| <=0.5 | >16 | >16 | 8     | 64   | 8     | <=0.25 | >64 | >2    |
| <=0.5 | 4   | 8   | 2     | <=32 | <=0.5 | <=0.25 | <=4 | >2    |
| <=0.5 | 4   | 4   | <=0.5 | <=32 | <=0.5 | <=0.25 | >64 | <=0.5 |
| <=0.5 | 16  | 16  | 4     | <=32 | >8    | <=0.25 | >64 | >2    |
| <=0.5 | <=2 | 8   | <=0.5 | <=32 | 1     | <=0.25 | >64 | >2    |
| <=0.5 | 4   | 4   | <=0.5 | <=32 | >8    | <=0.25 | >64 | >2    |
| <=0.5 | 4   | 4   | <=0.5 | <=32 | <=0.5 | <=0.25 | 32  | <=0.5 |
| <=0.5 | 4   | 4   | <=0.5 | <=32 | <=0.5 | <=0.25 | >64 | >2    |
| >16   | >16 | >16 | >32   | <=32 | >8    | 0.5    | >64 | >2    |
| >16   | >16 | >16 | >32   | <=32 | >8    | <=0.25 | >64 | >2    |
| 1     | 4   | >16 | <=0.5 | <=32 | >8    | <=0.25 | 64  | >2    |
| <=0.5 | <=2 | 2   | <=0.5 | <=32 | 1     | <=0.25 | >64 | <=0.5 |
| <=0.5 | <=2 | 2   | <=0.5 | <=32 | 1     | <=0.25 | <=4 | <=0.5 |
| <=0.5 | <=2 | 2   | <=0.5 | <=32 | <=0.5 | <=0.25 | <=4 | <=0.5 |
| <=0.5 | 4   | 8   | <=0.5 | <=32 | >8    | <=0.25 | >64 | >2    |
| <=0.5 | 8   | 4   | <=0.5 | <=32 | <=0.5 | <=0.25 | >64 | >2    |
| 16    | 4   | >16 | >32   | <=32 | >8    | <=0.25 | >64 | >2    |
| <=0.5 | <=2 | 2   | <=0.5 | <=32 | 1     | <=0.25 | 64  | >2    |
| <=0.5 | 4   | 4   | <=0.5 | <=32 | 1     | <=0.25 | <=4 | <=0.5 |
| <=0.5 | 4   | 4   | <=0.5 | <=32 | <=0.5 | <=0.25 | >64 | >4    |
| <=0.5 | 8   | 4   | <=0.5 | <=32 | >8    | <=0.25 | >64 | >4    |
| <=0.5 | >16 | >16 | 4     | <=32 | 1     | <=0.25 | >64 | <=0.5 |
| 2     | >16 | >16 | >32   | >64  | >8    | 0.5    | >64 | >4    |
| <=0.5 | 4   | 4   | <=0.5 | <=32 | >8    | <=0.25 | >64 | >4    |
| <=0.5 | 16  | 8   | <=0.5 | <=32 | 1     | <=0.25 | 64  | >4    |
| <=0.5 | 4   | 2   | <=0.5 | <=32 | <=0.5 | <=0.25 | >64 | <=0.5 |
| <=0.5 | 4   | 4   | <=0.5 | <=32 | 2     | <=0.25 | 64  | <=0.5 |
| <=0.5 | 4   | 16  | <=0.5 | <=32 | 1     | <=0.25 | >64 | >4    |
| <=0.5 | 4   | 4   | <=0.5 | <=32 | 2     | <=0.25 | <=4 | >4    |
| <=0.5 | 4   | 8   | <=0.5 | <=32 | 1     | <=0.25 | <=4 | <=0.5 |
| <=0.5 | >16 | >16 | 1     | <=32 | >8    | <=0.25 | 64  | <=0.5 |
| <=0.5 | <=2 | 4   | <=0.5 | <=32 | >8    | <=0.25 | <=4 | >4    |
| <=0.5 | <=2 | 2   | <=0.5 | <=32 | <=0.5 | <=0.25 | <=4 | <=0.5 |
| <=0.5 | >16 | >16 | 32    | <=32 | >8    | <=0.25 | >64 | >4    |
| <=0.5 | 8   | 4   | <=0.5 | <=32 | 1     | <=0.25 | <=4 | 1     |
| <=0.5 | >16 | >16 | 16    | <=32 | 2     | <=0.25 | >64 | >4    |
| <=0.5 | >16 | >16 | 16    | <=32 | >8    | <=0.25 | >64 | <=0.5 |
| <=0.5 | <=2 | 4   | <=0.5 | <=32 | 1     | <=0.25 | >64 | >4    |
| <=0.5 | 4   | 4   | <=0.5 | <=32 | >8    | <=0.25 | <=4 | >4    |
| <=0.5 | 4   | 4   | <=0.5 | <=32 | 2     | <=0.25 | <=4 | <=0.5 |
| <=0.5 | 8   | 8   | <=0.5 | <=32 | 1     | <=0.25 | >64 | <=0.5 |
| <=0.5 | 4   | 4   | <=0.5 | <=32 | 1     | <=0.25 | >64 | >4    |
| <=0.5 | 16  | 8   | <=0.5 | <=32 | 1     | <=0.25 | >64 | <=0.5 |
| <=0.5 | 4   | 4   | <=0.5 | <=32 | 1     | <=0.25 | >64 | <=0.5 |
| <=0.5 | 8   | 4   | <=0.5 | <=32 | >8    | <=0.25 | >64 | >4    |
| <=0.5 | 4   | 4   | <=0.5 | <=32 | 1     | <=0.25 | <=4 | <=0.5 |
| <=0.5 | 16  | 8   | <=0.5 | <=32 | 1     | 0.5    | <=4 | <=0.5 |
| <=0.5 | 8   | 8   | <=0.5 | <=32 | 1     | <=0.25 | <=4 | <=0.5 |
| <=0.5 | 4   | 4   | <=0.5 | <=32 | <=0.5 | <=0.25 | <=4 | <=0.5 |
| <=0.5 | 8   | 8   | <=0.5 | 64   | 1     | <=0.25 | 32  | <=0.5 |
| <=0.5 | 4   | 4   | <=0.5 | <=32 | 1     | <=0.25 | >64 | >4    |
| <=0.5 | 8   | 8   | <=0.5 | <=32 | >8    | <=0.25 | >64 | <=0.5 |
| <=0.5 | 4   | 4   | <=0.5 | <=32 | 1     | <=0.25 | <=4 | <=0.5 |
| <=0.5 | 4   | 4   | <=0.5 | <=32 | <=0.5 | <=0.25 | <=4 | <=0.5 |

|       |     |     |       |      |       |        |     |       |
|-------|-----|-----|-------|------|-------|--------|-----|-------|
| <=0.5 | 4   | 4   | <=0.5 | <=32 | 1     | <=0.25 | >64 | >4    |
| <=0.5 | 4   | 8   | <=0.5 | <=32 | 1     | <=0.25 | <=4 | <=0.5 |
| >16   | 16  | >16 | >32   | <=32 | >8    | 0.5    | >64 | >4    |
| <=0.5 | 4   | 8   | <=0.5 | <=32 | 1     | <=0.25 | <=4 | <=0.5 |
| <=0.5 | >16 | >16 | 16    | <=32 | >8    | <=0.25 | >64 | >4    |
| <=0.5 | <=2 | 4   | <=0.5 | <=32 | 1     | <=0.25 | >64 | >4    |
| <=0.5 | 8   | 4   | <=0.5 | <=32 | 1     | <=0.25 | >64 | >4    |
| <=0.5 | 8   | 8   | <=0.5 | <=32 | 1     | <=0.25 | <=4 | <=0.5 |
| <=0.5 | <=2 | 4   | <=0.5 | <=32 | 4     | <=0.25 | >64 | <=0.5 |
| <=0.5 | 8   | 4   | <=0.5 | <=32 | 1     | <=0.25 | >64 | >4    |
| <=0.5 | 4   | 4   | <=0.5 | <=32 | 1     | <=0.25 | <=4 | <=0.5 |
| <=0.5 | <=2 | 2   | <=0.5 | <=32 | <=0.5 | <=0.25 | >64 | >4    |
| <=0.5 | 4   | 4   | <=0.5 | <=32 | 1     | <=0.25 | >64 | >4    |
| <=0.5 | <=2 | 4   | <=0.5 | <=32 | <=0.5 | <=0.25 | <=4 | <=0.5 |
| <=0.5 | 4   | 8   | <=0.5 | <=32 | 2     | <=0.25 | >64 | >4    |
| <=0.5 | 8   | 8   | <=0.5 | <=32 | >8    | <=0.25 | >64 | >4    |
| <=0.5 | <=2 | 4   | <=0.5 | <=32 | 1     | <=0.25 | >64 | <=0.5 |
| <=0.5 | >16 | >16 | 32    | <=32 | >8    | 0.5    | >64 | >2    |
| <=0.5 | 4   | 4   | <=0.5 | <=32 | >8    | <=0.25 | >64 | <=0.5 |
| <=0.5 | >16 | >16 | 8     | 64   | <=0.5 | <=0.25 | >64 | >2    |
| <=0.5 | <=2 | 4   | <=0.5 | 64   | 2     | <=0.25 | >64 | <=0.5 |
| <=0.5 | 4   | 4   | <=0.5 | >64  | <=0.5 | <=0.25 | >64 | <=0.5 |
| <=0.5 | >16 | 16  | <=0.5 | <=32 | >8    | 0.5    | 64  | >2    |
| <=0.5 | 4   | 4   | <=0.5 | <=32 | 1     | <=0.25 | >64 | <=0.5 |
| <=0.5 | >16 | >16 | <=0.5 | <=32 | 1     | <=0.25 | >64 | <=0.5 |
| <=0.5 | >16 | 16  | 4     | <=32 | 1     | <=0.25 | 32  | <=0.5 |
| <=0.5 | 8   | 4   | <=0.5 | <=32 | 2     | <=0.25 | >64 | <=0.5 |
| <=0.5 | 4   | 8   | <=0.5 | <=32 | 1     | <=0.25 | <=4 | <=0.5 |
| <=0.5 | <=2 | 2   | <=0.5 | <=32 | 1     | <=0.25 | <=4 | <=0.5 |
| <=0.5 | >16 | >16 | 16    | <=32 | 1     | <=0.25 | >64 | >4    |
| <=0.5 | 8   | >16 | <=0.5 | <=32 | 2     | <=0.25 | >64 | >4    |
| <=0.5 | 4   | 4   | <=0.5 | <=32 | 1     | <=0.25 | <=4 | <=0.5 |
| <=0.5 | <=2 | 2   | <=0.5 | <=32 | <=0.5 | <=0.25 | >64 | >4    |
| <=0.5 | 8   | 16  | <=0.5 | <=32 | >8    | <=0.25 | >64 | >4    |
| <=0.5 | 4   | 2   | <=0.5 | <=32 | 8     | <=0.25 | >64 | >4    |
| <=0.5 | <=2 | 4   | <=0.5 | 64   | 1     | <=0.25 | <=4 | >4    |
| <=0.5 | 4   | 4   | <=0.5 | <=32 | 1     | <=0.25 | <=4 | <=0.5 |
| <=0.5 | <=2 | 4   | <=0.5 | <=32 | 1     | <=0.25 | <=4 | <=0.5 |
| >16   | >16 | >16 | >32   | <=32 | >8    | <=0.25 | >64 | >4    |
| <=0.5 | 4   | 4   | <=0.5 | <=32 | <=0.5 | <=0.25 | >64 | >4    |
| <=0.5 | 8   | 4   | <=0.5 | <=32 | 1     | <=0.25 | >64 | >4    |
| <=0.5 | <=2 | 8   | <=0.5 | <=32 | 8     | <=0.25 | >64 | >4    |
| 8     | 8   | >16 | >32   | <=32 | >8    | <=0.25 | >64 | >4    |
| <=0.5 | <=2 | 4   | <=0.5 | <=32 | <=0.5 | <=0.25 | <=4 | >4    |
| <=0.5 | 4   | 4   | 1     | <=32 | >8    | <=0.25 | >64 | >4    |
| <=0.5 | <=2 | 4   | <=0.5 | <=32 | <=0.5 | <=0.25 | <=4 | <=0.5 |
| <=0.5 | <=2 | 4   | <=0.5 | <=32 | <=0.5 | <=0.25 | <=4 | <=0.5 |
| <=0.5 | 4   | 4   | <=0.5 | <=32 | 1     | <=0.25 | >64 | >4    |
| <=0.5 | 4   | 4   | <=0.5 | <=32 | <=0.5 | <=0.25 | >64 | <=0.5 |
| <=0.5 | 4   | 4   | <=0.5 | <=32 | >8    | <=0.25 | >64 | >4    |
| <=0.5 | 4   | 4   | <=0.5 | <=32 | <=0.5 | <=0.25 | >64 | >4    |
| <=0.5 | <=2 | 4   | <=0.5 | <=32 | <=0.5 | <=0.25 | >64 | >4    |
| 1     | >16 | >16 | 8     | <=32 | 1     | <=0.25 | >64 | <=0.5 |
| 1     | 16  | 16  | <=0.5 | <=32 | >8    | <=0.25 | >64 | >4    |
| <=0.5 | 4   | 2   | <=0.5 | <=32 | <=0.5 | <=0.25 | <=4 | >4    |
| <=0.5 | <=2 | 4   | <=0.5 | <=32 | <=0.5 | <=0.25 | >64 | >4    |
| <=0.5 | 8   | 8   | <=0.5 | <=32 | 2     | <=0.25 | >64 | >4    |
| <=0.5 | 8   | 4   | <=0.5 | <=32 | 1     | <=0.25 | >64 | <=0.5 |
| <=0.5 | 8   | 8   | <=0.5 | 64   | >8    | <=0.25 | >64 | >4    |
| <=0.5 | 4   | 8   | <=0.5 | <=32 | 2     | <=0.25 | >64 | >4    |
| <=0.5 | 4   | 4   | <=0.5 | <=32 | 1     | <=0.25 | <=4 | <=0.5 |



|       |     |     |       |      |       |        |     |       |
|-------|-----|-----|-------|------|-------|--------|-----|-------|
| <=0.5 | 4   | 8   | <=0.5 | <=32 | 4     | <=0.25 | >64 | <=0.5 |
| <=0.5 | 4   | 4   | <=0.5 | <=32 | 8     | <=0.25 | >64 | >4    |
| <=0.5 | 4   | 4   | <=0.5 | <=32 | 8     | <=0.25 | >64 | >4    |
| <=0.5 | 4   | 4   | <=0.5 | <=32 | 1     | <=0.25 | >64 | <=0.5 |
| <=0.5 | 4   | 4   | <=0.5 | <=32 | <=0.5 | <=0.25 | >64 | >4    |
| >16   | 4   | >16 | >32   | <=32 | >8    | <=0.25 | >64 | >4    |
| <=0.5 | 4   | 8   | <=0.5 | <=32 | 1     | <=0.25 | 64  | <=0.5 |
| <=0.5 | 4   | 4   | <=0.5 | <=32 | <=0.5 | <=0.25 | >64 | <=0.5 |
| <=0.5 | <=2 | 4   | <=0.5 | <=32 | <=0.5 | <=0.25 | >64 | >2    |
| <=0.5 | 4   | 2   | <=0.5 | <=32 | <=0.5 | <=0.25 | <=4 | <=0.5 |
| <=0.5 | 4   | 4   | <=0.5 | <=32 | >8    | <=0.25 | >64 | >4    |
| <=0.5 | 4   | 8   | <=0.5 | <=32 | >8    | <=0.25 | >64 | >4    |
| <=0.5 | <=2 | 4   | <=0.5 | <=32 | 4     | <=0.25 | >64 | <=0.5 |
| <=0.5 | 4   | 4   | <=0.5 | <=32 | <=0.5 | <=0.25 | >64 | <=0.5 |
| <=0.5 | 4   | 4   | <=0.5 | <=32 | 1     | <=0.25 | <=4 | <=0.5 |
| <=0.5 | <=2 | 2   | <=0.5 | <=32 | <=0.5 | <=0.25 | <=4 | <=0.5 |
| <=0.5 | 4   | 4   | <=0.5 | <=32 | >8    | <=0.25 | >64 | <=0.5 |
| 8     | >16 | >16 | >32   | <=32 | >8    | <=0.25 | >64 | >4    |
| <=0.5 | 8   | 8   | <=0.5 | <=32 | <=0.5 | <=0.25 | >64 | >4    |
| <=0.5 | 4   | 2   | <=0.5 | <=32 | <=0.5 | <=0.25 | >64 | >4    |
| <=0.5 | 8   | 4   | <=0.5 | <=32 | 1     | <=0.25 | >64 | <=0.5 |
| <=0.5 | <=2 | 4   | <=0.5 | <=32 | 1     | <=0.25 | >64 | >4    |
| <=0.5 | >16 | >16 | >32   | <=32 | >8    | 0.5    | >64 | <=0.5 |
| <=0.5 | 4   | 4   | 2     | <=32 | 2     | <=0.25 | >64 | <=0.5 |
| <=0.5 | 4   | 2   | <=0.5 | <=32 | 1     | <=0.25 | >64 | >4    |
| <=0.5 | 8   | 8   | <=0.5 | <=32 | 1     | 0.5    | <=4 | <=0.5 |
| <=0.5 | <=2 | 2   | <=0.5 | <=32 | 1     | <=0.25 | <=4 | <=0.5 |
| <=0.5 | 4   | 4   | <=0.5 | <=32 | 1     | <=0.25 | <=4 | <=0.5 |
| <=0.5 | 4   | 4   | <=0.5 | <=32 | 2     | <=0.25 | <=4 | >4    |
| <=0.5 | >16 | >16 | 8     | <=32 | <=0.5 | <=0.25 | >64 | >4    |
| <=0.5 | <=2 | 4   | <=0.5 | <=32 | <=0.5 | <=0.25 | >64 | >4    |
| <=0.5 | 4   | 8   | <=0.5 | <=32 | 1     | <=0.25 | <=4 | <=0.5 |
| <=0.5 | 4   | 4   | <=0.5 | <=32 | <=0.5 | <=0.25 | <=4 | <=0.5 |
| <=0.5 | 8   | 4   | <=0.5 | <=32 | <=0.5 | <=0.25 | >64 | >4    |
| <=0.5 | 4   | 4   | <=0.5 | <=32 | <=0.5 | <=0.25 | >64 | <=0.5 |
| <=0.5 | 4   | 4   | <=0.5 | <=32 | <=0.5 | <=0.25 | >64 | >4    |
| <=0.5 | 4   | 4   | <=0.5 | <=32 | 1     | <=0.25 | 32  | >2    |
| <=0.5 | 8   | 8   | <=0.5 | <=32 | <=0.5 | <=0.25 | >64 | >2    |
| <=0.5 | 8   | 16  | <=0.5 | <=32 | 2     | 0.5    | >64 | >2    |
| <=0.5 | >16 | 8   | <=0.5 | <=32 | 2     | <=0.25 | >64 | <=0.5 |
| <=0.5 | 4   | 8   | <=0.5 | <=32 | <=0.5 | <=0.25 | 8   | <=0.5 |
| <=0.5 | 4   | 8   | <=0.5 | <=32 | 1     | <=0.25 | >64 | >2    |
| <=0.5 | <=2 | 4   | <=0.5 | <=32 | 1     | <=0.25 | <=4 | <=0.5 |
| 1     | >16 | >16 | 16    | <=32 | >8    | <=0.25 | >64 | >2    |
| <=0.5 | >16 | >16 | 8     | 64   | 1     | 0.5    | >64 | >2    |
| <=0.5 | <=2 | 2   | <=0.5 | <=32 | 1     | 1      | >64 | >2    |
| <=0.5 | 4   | 16  | <=0.5 | <=32 | 1     | <=0.25 | >64 | <=0.5 |
| <=0.5 | 8   | 8   | <=0.5 | <=32 | <=0.5 | <=0.25 | 64  | <=0.5 |
| <=0.5 | 16  | 16  | <=0.5 | <=32 | >8    | <=0.25 | >64 | <=0.5 |
| <=0.5 | 4   | 4   | <=0.5 | <=32 | 2     | <=0.25 | <=4 | <=0.5 |
| <=0.5 | 4   | 4   | <=0.5 | <=32 | >8    | <=0.25 | >64 | >2    |
| <=0.5 | 4   | 4   | <=0.5 | <=32 | 1     | <=0.25 | >64 | >2    |
| <=0.5 | 8   | 8   | <=0.5 | <=32 | >8    | <=0.25 | >64 | <=0.5 |
| <=0.5 | <=2 | <=1 | <=0.5 | <=32 | 1     | <=0.25 | <=4 | <=0.5 |
| <=0.5 | 8   | 4   | <=0.5 | <=32 | >8    | <=0.25 | >64 | >2    |
| <=0.5 | 4   | 4   | <=0.5 | <=32 | 2     | <=0.25 | <=4 | <=0.5 |
| <=0.5 | 4   | 4   | <=0.5 | <=32 | <=0.5 | <=0.25 | >64 | >2    |
| <=0.5 | 16  | 4   | <=0.5 | <=32 | >8    | <=0.25 | >64 | <=0.5 |
| <=0.5 | 8   | 8   | <=0.5 | <=32 | 2     | <=0.25 | >64 | <=0.5 |
| <=0.5 | 8   | 8   | <=0.5 | <=32 | >8    | <=0.25 | >64 | >2    |
| <=0.5 | 4   | 8   | <=0.5 | <=32 | 1     | <=0.25 | >64 | <=0.5 |

|       |     |     |       |      |       |        |     |       |
|-------|-----|-----|-------|------|-------|--------|-----|-------|
| <=0.5 | 8   | 16  | <=0.5 | <=32 | 8     | <=0.25 | >64 | >2    |
| <=0.5 | 4   | 4   | <=0.5 | <=32 | 1     | <=0.25 | >64 | <=0.5 |
| 4     | <=2 | >16 | >32   | <=32 | <=0.5 | <=0.25 | >64 | >2    |
| <=0.5 | 8   | 8   | <=0.5 | <=32 | <=0.5 | <=0.25 | >64 | <=0.5 |
| <=0.5 | 4   | 4   | <=0.5 | <=32 | >8    | <=0.25 | >64 | >2    |
| <=0.5 | 8   | 8   | <=0.5 | 64   | 1     | <=0.25 | >64 | >2    |
| <=0.5 | <=2 | 2   | <=0.5 | <=32 | 1     | <=0.25 | <=4 | <=0.5 |
| <=0.5 | <=2 | 8   | <=0.5 | <=32 | <=0.5 | <=0.25 | >64 | <=0.5 |
| <=0.5 | 16  | 16  | <=0.5 | >64  | <=0.5 | <=0.25 | <=4 | <=0.5 |
| <=0.5 | 4   | 8   | <=0.5 | <=32 | 1     | <=0.25 | >64 | >2    |
| <=0.5 | 4   | 4   | <=0.5 | <=32 | >8    | <=0.25 | >64 | >2    |
| <=0.5 | 4   | 4   | <=0.5 | <=32 | 1     | <=0.25 | <=4 | <=0.5 |
| <=0.5 | 8   | 8   | <=0.5 | <=32 | <=0.5 | <=0.25 | >64 | <=0.5 |
| <=0.5 | 4   | 8   | <=0.5 | <=32 | >8    | <=0.25 | >64 | <=0.5 |
| <=0.5 | 8   | 8   | <=0.5 | <=32 | 2     | <=0.25 | <=4 | <=0.5 |
| <=0.5 | 4   | 4   | <=0.5 |      | <=0.5 | <=0.25 | >64 | >4    |
| <=0.5 | >16 | >16 | 16    |      | >8    | <=0.25 | >64 | >4    |
| <=0.5 | 8   | 4   | <=0.5 |      | >8    | <=0.25 | >64 | >4    |
| >16?  | >16 | >16 | >32   |      | 1     | 1      | 32  | <=0.5 |
| <=0.5 | <=2 | 2   | <=0.5 |      | <=0.5 | 0.5    | >64 | <=0.5 |
| <=0.5 | <=2 | 4   | <=0.5 |      | 1     | <=0.25 | <=4 | >4    |
| <=0.5 | 8   | 8   | <=0.5 |      | 8     | <=0.25 | >64 | >4    |
| <=0.5 | 4   | 2   | <=0.5 |      | 1     | <=0.25 | <=4 | <=0.5 |
| <=0.5 | <=2 | 8   | <=0.5 |      | >8    | <=0.25 | >64 | >4    |
| 2     | <=2 | >16 | >32   |      | 2     | 1      | >64 | <=0.5 |
| <=0.5 | <=2 | 4   | <=0.5 |      | 1     | <=0.25 | <=4 | <=0.5 |
| <=0.5 | 4   | 4   | <=0.5 |      | <=0.5 | <=0.25 | <=4 | <=0.5 |
| <=0.5 | 8   | 4   | <=0.5 |      | 1     | <=0.25 | <=4 | <=0.5 |
| <=0.5 | 4   | 4   | <=0.5 |      | 1     | <=0.25 | <=4 | <=0.5 |
| <=0.5 | 4   | 4   | <=0.5 |      | 1     | <=0.25 | <=4 | <=0.5 |
| <=0.5 | <=2 | 2   | <=0.5 |      | 2     | <=0.25 | >64 | <=0.5 |
| <=0.5 | 4   | 8   | <=0.5 |      | 1     | <=0.25 | >64 | >4    |
| <=0.5 | <=2 | 4   | <=0.5 |      | 1     | <=0.25 | <=4 | <=0.5 |
| <=0.5 | 4   | 4   | <=0.5 |      | 1     | <=0.25 | <=4 | <=0.5 |
| <=0.5 | <=2 | 4   | <=0.5 |      | 1     | <=0.25 | <=4 | <=0.5 |
| <=0.5 | 4   | 2   | <=0.5 |      | 1     | 0.5    | <=4 | <=0.5 |
| <=0.5 | 8   | 8   | <=0.5 |      | 1     | <=0.25 | >64 | >4    |
| <=0.5 | <=2 | 4   | <=0.5 |      | 1     | <=0.25 | <=4 | <=0.5 |
| 16    | 8   | >16 | >32   |      | <=0.5 | <=0.25 | >64 | >4    |
| <=0.5 | <=2 | 4   | <=0.5 |      | 1     | <=0.25 | <=4 | <=0.5 |
| 4     | 8   | >16 | >32   |      | >8    | <=0.25 | >64 | >4    |
| <=0.5 | 4   | 4   | <=0.5 |      | 1     | <=0.25 | <=4 | <=0.5 |
| >16   | 16  | >16 | >32   |      | <=0.5 | 0.5    | >64 | >4    |
| <=0.5 | 8   | 4   | <=0.5 |      | 2     | 0.5    | >64 | >4    |
| <=0.5 | 8   | 8   | <=0.5 |      | >8    | <=0.25 | >64 | >4    |
| <=0.5 | 4   | 4   | <=0.5 |      | 1     | <=0.25 | >64 | <=0.5 |
| <=0.5 | 8   | 4   | <=0.5 |      | 2     | <=0.25 | <=4 | >4    |
| <=0.5 | 16  | 16  | <=0.5 |      | 4     | 0.5    | >64 | <=0.5 |
| 8     | 16  | >16 | >32   |      | 2     | 0.5    | >64 | >4    |
| <=0.5 | >16 | >16 | 8     |      | >8    | <=0.25 | 64  | >4    |
| <=0.5 | >16 | 16  | 8     |      | 2     | <=0.25 | >64 | >4    |
| 2     | 4   | >16 | >32   |      | >8    | <=0.25 | >64 | <=0.5 |
| 16    | >16 | >16 | >32   |      | 1     | 1      | >64 | >4    |
| <=0.5 | 4   | 4   | <=0.5 |      | 1     | <=0.25 | <=4 | <=0.5 |
| <=0.5 | 4   | 4   | <=0.5 |      | 1     | <=0.25 | <=4 | >4    |
| <=0.5 | 4   | 4   | <=0.5 |      | 1     | <=0.25 | <=4 | <=0.5 |
| <=0.5 | 4   | 4   | <=0.5 |      | 1     | <=0.25 | <=4 | <=0.5 |
| <=0.5 | 4   | 4   | <=0.5 |      | 1     | <=0.25 | <=4 | <=0.5 |
| <=0.5 | 4   | 4   | <=0.5 |      | 2     | <=0.25 | <=4 | >4    |
| <=0.5 | <=2 | 4   | <=0.5 |      | <=0.5 | <=0.25 | >64 | <=0.5 |
| <=0.5 | <=2 | 4   | <=0.5 |      | >8    | <=0.25 | >64 | >4    |
| <=0.5 | 4   | 2   | <=0.5 |      | <=0.5 | <=0.25 | <=4 | <=0.5 |

|       |     |     |       |       |        |     |       |
|-------|-----|-----|-------|-------|--------|-----|-------|
| <=0.5 | 8   | 8   | <=0.5 | <=0.5 | <=0.25 | >64 | >4    |
| <=0.5 | <=2 | 2   | <=0.5 | 1     | <=0.25 | >64 | >4    |
| <=0.5 | 4   | 8   | <=0.5 | <=0.5 | <=0.25 | <=4 | <=0.5 |
| <=0.5 | 4   | 4   | <=0.5 | 1     | <=0.25 | <=4 | <=0.5 |
| 4     | >16 | >16 | >32   | >8    | <=0.25 | >64 | <=0.5 |
| <=0.5 | <=2 | 2   | <=0.5 | >8    | 0.5    | >64 | >4    |
| <=0.5 | <=2 | 4   | <=0.5 | <=0.5 | <=0.25 | 64  | >4    |
| 1     | >16 | >16 | 16    | >8    | 0.5    | >64 | <=0.5 |
| <=0.5 | <=2 | 2   | <=0.5 | <=0.5 | <=0.25 | <=4 | <=0.5 |
| <=0.5 | 4   | 4   | <=0.5 | 1     | <=0.25 | >64 | >4    |
| <=0.5 | <=2 | 8   | <=0.5 | 1     | <=0.25 | <=4 | <=0.5 |
| <=0.5 | 8   | 8   | <=0.5 | 1     | <=0.25 | >64 | <=0.5 |
| <=0.5 | >16 | >16 | 2     | >8    | <=0.25 | >64 | >4    |
| <=0.5 | <=2 | 4   | <=0.5 | 1     | <=0.25 | >64 | >4    |
| <=0.5 | 8   | 4   | <=0.5 | 1     | <=0.25 | <=4 | <=0.5 |
| <=0.5 | >16 | >16 | 8     | >8    | 0.5    | >64 | <=0.5 |
| 4     | <=2 | >16 | 32    | >8    | <=0.25 | >64 | >4    |
| <=0.5 | 4   | 4   | <=0.5 | 8     | <=0.25 | >64 | >4    |
| <=0.5 | 8   | 8   | <=0.5 | 1     | <=0.25 | >64 | <=0.5 |
| <=0.5 | 4   | 4   | <=0.5 | >8    | <=0.25 | >64 | >4    |
| <=0.5 | 16  | 8   | <=0.5 | 2     | <=0.25 | >64 | >4    |
| <=0.5 | <=2 | 2   | <=0.5 | <=0.5 | <=0.25 | <=4 | <=0.5 |
| <=0.5 | >16 | >16 | 16    | 2     | 0.5    | 32  | >4    |
| <=0.5 | 8   | 16  | <=0.5 | >8    | <=0.25 | >64 | 4     |
| <=0.5 | <=2 | 4   | <=0.5 | <=0.5 | <=0.25 | <=4 | >4    |
| <=0.5 | 8   | 8   | <=0.5 | 1     | <=0.25 | >64 | >4    |
| <=0.5 | <=2 | 2   | <=0.5 | 1     | <=0.25 | <=4 | <=0.5 |
| <=0.5 | <=2 | <=1 | <=0.5 | 1     | <=0.25 | <=4 | <=0.5 |
| <=0.5 | 4   | 8   | <=0.5 | 1     | <=0.25 | >64 | <=0.5 |
| <=0.5 | 8   | 8   | <=0.5 | 8     | <=0.25 | >64 | 4     |
| <=0.5 | 4   | 4   | <=0.5 | 1     | <=0.25 | <=4 | <=0.5 |
| <=0.5 | 4   | 4   | <=0.5 | 1     | <=0.25 | >64 | <=0.5 |
| <=0.5 | 4   | 8   | <=0.5 | 1     | <=0.25 | >64 | >4    |
| <=0.5 | 8   | 4   | <=0.5 | >8    | <=0.25 | >64 | >4    |
| <=0.5 | 16  | 16  | <=0.5 | <=0.5 | <=0.25 | >64 | >4    |
| <=0.5 | >16 | >16 | 8     | >8    | <=0.25 | >64 | >4    |
| <=0.5 | <=2 | 4   | <=0.5 | <=0.5 | <=0.25 | >64 | <=0.5 |
| <=0.5 | 8   | 4   | <=0.5 | 2     | <=0.25 | <=4 | <=0.5 |
| <=0.5 | <=2 | 4   | <=0.5 | 1     | <=0.25 | >64 | <=0.5 |
| <=0.5 | <=2 | 8   | <=0.5 | 1     | <=0.25 | >64 | <=0.5 |
| <=0.5 | 16  | 4   | <=0.5 | >8    | <=0.25 | >64 | >4    |
| <=0.5 | 4   | 2   | <=0.5 | 1     | <=0.25 | >64 | >4    |
| <=0.5 | 4   | 8   | <=0.5 | <=0.5 | <=0.25 | <=4 | <=0.5 |
| <=0.5 | 16  | 8   | 2     | <=0.5 | 0.5    | 64  | >4    |
| <=0.5 | <=2 | 2   | <=0.5 | <=0.5 | <=0.25 | >64 | <=0.5 |
| 2     | >16 | >16 | >32   | 4     | 0.5    | >64 | >4    |
| <=0.5 | 4   | 4   | <=0.5 | 1     | <=0.25 | >64 | <=0.5 |
| 2     | >16 | >16 | >32   | >8    | 0.5    | >64 | >4    |
| >16   | 4   | >16 | >32   | >8    | <=0.25 | >64 | <=0.5 |
| <=0.5 | 8   | 8   | <=0.5 | 2     | <=0.25 | >64 | >4    |
| <=0.5 | 8   | 16  | <=0.5 | 2     | <=0.25 | >64 | >4    |
| <=0.5 | 8   | 4   | <=0.5 | 1     | <=0.25 | <=4 | <=0.5 |
| <=0.5 | <=2 | <=1 | <=0.5 | <=0.5 | <=0.25 | <=4 | >4    |
| <=0.5 | 4   | 4   | <=0.5 | >8    | <=0.25 | >64 | >4    |
| <=0.5 | 4   | 4   | <=0.5 | >8    | <=0.25 | >64 | >4    |
| <=0.5 | 4   | 4   | <=0.5 | 1     | <=0.25 | <=4 | <=0.5 |
| <=0.5 | <=2 | 2   | <=0.5 | >8    | <=0.25 | >64 | <=0.5 |
| <=0.5 | <=2 | 2   | <=0.5 | <=0.5 | <=0.25 | <=4 | <=0.5 |
| <=0.5 | <=2 | 4   | <=0.5 | <=0.5 | <=0.25 | <=4 | <=0.5 |
| <=0.5 | 4   | 4   | <=0.5 | 1     | <=0.25 | >64 | <=0.5 |
| <=0.5 | 4   | 4   | <=0.5 | 1     | <=0.25 | >64 | >4    |

|        |       |     |     |       |       |        |     |        |
|--------|-------|-----|-----|-------|-------|--------|-----|--------|
|        | <=0.5 | 4   | 4   | <=0.5 | 1     | <=0.25 | >64 | <=0.5  |
|        | <=0.5 | >16 | >16 | 32    | 4     | <=0.25 | 32  | <=0.5  |
|        | <=0.5 | 16  | 8   | <=0.5 | >8    | <=0.25 | 64  | >4     |
|        | <=0.5 | <=2 | 2   | <=0.5 | 1     | <=0.25 | <=4 | <=0.5  |
|        | <=0.5 | >16 | 16  | <=0.5 | 1     | <=0.25 | <=4 | <=0.5  |
|        | <=0.5 | 8   | 8   | <=0.5 | 1     | <=0.25 | >64 | <=0.5  |
|        | <=0.5 | 8   | 4   | <=0.5 | 1     | <=0.25 | >64 | <=0.5  |
| <=0.25 | >16   | >16 | >16 | >32   | >8    | <=0.25 | >64 | <=0.25 |
|        | 16    | 4   | >16 | >32   | 2     | <=0.25 | >64 | <=0.5  |
|        | <=0.5 | 4   | 4   | <=0.5 | 1     | <=0.25 | <=4 | <=0.5  |
|        | <=0.5 | 16  | 16  | <=0.5 | >8    | <=0.25 | >64 | >4     |
|        | <=0.5 | 8   | 8   | <=0.5 | 1     | <=0.25 | <=4 | <=0.5  |
|        | <=0.5 | 8   | 8   | <=0.5 | <=0.5 | <=0.25 | >64 | >4     |
|        | <=0.5 | 4   | 4   | <=0.5 | 1     | <=0.25 | <=4 | <=0.5  |
|        | <=0.5 | <=2 | 4   | <=0.5 | <=0.5 | <=0.25 | >64 | >4     |
|        | <=0.5 | 8   | 4   | <=0.5 | 1     | <=0.25 | >64 | >4     |
|        | <=0.5 | >16 | >16 | 8     | 1     | <=0.25 | >64 | >4     |
| <=0.25 | <=0.5 | 8   | 16  | <=0.5 | 1     | 1      | <=4 | <=0.5  |
|        | <=0.5 | 16  | >16 | <=0.5 | 1     | <=0.25 | 8   | <=0.5  |
|        | <=0.5 | >16 | >16 | 8     | >8    | <=0.25 | 64  | >4     |
|        | <=0.5 | 4   | 8   | <=0.5 | 1     | <=0.25 | >64 | >4     |
|        | <=0.5 | <=2 | 2   | <=0.5 | 1     | <=0.25 | 64  | >4     |
|        | <=0.5 | <=2 | 2   | <=0.5 | <=0.5 | <=0.25 | >64 | >4     |
|        | <=0.5 | 16  | 16  | <=0.5 | >8    | <=0.25 | >64 | >4     |
|        | <=0.5 | 4   | 4   | <=0.5 | >8    | 0.5    | >64 | >4     |
|        | <=0.5 | >16 | >16 | 8     | >8    | <=0.25 | >64 | >4     |
|        | <=0.5 | 8   | 8   | <=0.5 | 1     | <=0.25 | <=4 | >4     |
|        | <=0.5 | 4   | 8   | <=0.5 | >8    | <=0.25 | >64 | >4     |
|        | <=0.5 | >16 | >16 | 8     | 1     | <=0.25 | >64 | >4     |
|        | <=0.5 | <=2 | 2   | <=0.5 | <=0.5 | <=0.25 | >64 | <=0.5  |
|        | <=0.5 | <=2 | 4   | <=0.5 | 1     | <=0.25 | >64 | <=0.5  |
|        | 4     | >16 | >16 | >32   | >8    | 0.5    | >64 | >4     |
|        | <=0.5 | 4   | 8   | <=0.5 | >8    | <=0.25 | >64 | >4     |
|        | >16   | >16 | >16 | >32   | >8    | 0.5    | >64 | >4     |
|        | >16   | 8   | >16 | >32   | >8    | <=0.25 | >64 | >4     |
|        | >16   | 16  | >16 | >32   | 1     | <=0.25 | >64 | >4     |
|        | <=0.5 | 8   | 8   | <=0.5 | 1     | <=0.25 | >64 | >4     |
|        | <=0.5 | 8   | 8   | <=0.5 | >8    | <=0.25 | >64 | >4     |
|        | <=0.5 | <=2 | 2   | <=0.5 | 1     | 0.5    | >64 | >4     |
|        | <=0.5 | 4   | 4   | <=0.5 | 2     | <=0.25 | >64 | >4     |
|        | <=0.5 | <=2 | 4   | <=0.5 | <=0.5 | <=0.25 | >64 | <=0.5  |
|        | <=0.5 | 4   | 4   | <=0.5 | 2     | <=0.25 | <=4 | <=0.5  |
|        | <=0.5 | >16 | >16 | 16    | 4     | <=0.25 | >64 | >4     |
|        | <=0.5 | 4   | 4   | <=0.5 | 1     | <=0.25 | <=4 | <=0.5  |
|        | <=0.5 | 8   | 8   | <=0.5 | >8    | <=0.25 | >64 | >4     |
|        | <=0.5 | 4   | 4   | <=0.5 | 1     | <=0.25 | >64 | <=0.5  |
|        | <=0.5 | 8   | 8   | <=0.5 | 1     | <=0.25 | <=4 | <=0.5  |
|        | <=0.5 | 4   | 8   | <=0.5 | <=0.5 | <=0.25 | >64 | >4     |
|        | <=0.5 | >16 | 8   | <=0.5 | >8    | <=0.25 | >64 | >4     |
|        | <=0.5 | 4   | 8   | <=0.5 | 1     | <=0.25 | <=4 | <=0.5  |
|        | <=0.5 | >16 | 16  | 4     | <=0.5 | <=0.25 | >64 | >4     |
|        | <=0.5 | <=2 | 4   | <=0.5 | 2     | <=0.25 | >64 | <=0.5  |
|        | <=0.5 | <=2 | 4   | <=0.5 | 1     | <=0.25 | >64 | >4     |
|        | <=0.5 | <=2 | 2   | <=0.5 | 1     | <=0.25 | >64 | <=0.5  |
|        | <=0.5 | 8   | 8   | <=0.5 | 1     | <=0.25 | <=4 | <=0.5  |
|        | <=0.5 | <=2 | 8   | <=0.5 | 2     | <=0.25 | 64  | <=0.5  |
|        | <=0.5 | 4   | 8   | <=0.5 | 1     | <=0.25 | <=4 | <=0.5  |
|        | <=0.5 | 4   | 2   | <=0.5 | <=0.5 | <=0.25 | <=4 | <=0.5  |
|        | <=0.5 | 4   | 4   | <=0.5 | >8    | <=0.25 | >64 | >4     |
|        | <=0.5 | <=2 | 4   | <=0.5 | 1     | <=0.25 | <=4 | <=0.5  |
|        | <=0.5 | <=2 | 4   | <=0.5 | <=0.5 | <=0.25 | >64 | >4     |

|       |     |     |       |       |        |     |       |
|-------|-----|-----|-------|-------|--------|-----|-------|
| <=0.5 | <=2 | 4   | <=0.5 | <=0.5 | <=0.25 | <=4 | <=0.5 |
| <=0.5 | 16  | 16  | <=0.5 | >8    | <=0.25 | <=4 | <=0.5 |
| <=0.5 | 4   | 4   | <=0.5 | <=0.5 | <=0.25 | <=4 | <=0.5 |
| <=0.5 | <=2 | <=1 | <=0.5 | <=0.5 | <=0.25 | >64 | >4    |
| <=0.5 | <=2 | 4   | <=0.5 | <=0.5 | <=0.25 | >64 | >4    |
| <=0.5 | 4   | 2   | <=0.5 | 1     | <=0.25 | 64  | >4    |
| <=0.5 | 4   | 4   | <=0.5 | >8    | <=0.25 | >64 | >4    |
| <=0.5 | <=2 | 2   | <=0.5 | 1     | <=0.25 | >64 | >4    |
| <=0.5 | <=2 | 2   | <=0.5 | 1     | <=0.25 | >64 | <=0.5 |
| <=0.5 | 8   | 8   | <=0.5 | >8    | <=0.25 | >64 | >4    |
| <=0.5 | 8   | 4   | <=0.5 | >8    | <=0.25 | >64 | >4    |
| 4     | 8   | >16 | >32   | <=0.5 | <=0.25 | >64 | >4    |
| <=0.5 | 4   | 4   | <=0.5 | >8    | <=0.25 | <=4 | >4    |
| <=0.5 | 4   | 8   | <=0.5 | >8    | <=0.25 | >64 | >4    |
| <=0.5 | 8   | 4   | <=0.5 | 2     | <=0.25 | <=4 | >4    |
| <=0.5 | 4   | 4   | <=0.5 | <=0.5 | <=0.25 | <=4 | <=0.5 |
| <=0.5 | 4   | 4   | <=0.5 | 1     | <=0.25 | >64 | <=0.5 |
| <=0.5 | 4   | 8   | <=0.5 | 1     | <=0.25 | <=4 | <=0.5 |
| <=0.5 | <=2 | <=1 | <=0.5 | <=0.5 | <=0.25 | <=4 | <=0.5 |
| <=0.5 | <=2 | 4   | <=0.5 | 1     | <=0.25 | >64 | >4    |
| <=0.5 | <=2 | 4   | <=0.5 | 1     | <=0.25 | <=4 | <=0.5 |
| <=0.5 | 4   | 4   | <=0.5 | <=0.5 | <=0.25 | <=4 | <=0.5 |
| >16   | >16 | >16 | >32   | >8    | <=0.25 | >64 | >4    |
| <=0.5 | 4   | 2   | <=0.5 | <=0.5 | <=0.25 | <=4 | <=0.5 |
| <=0.5 | 8   | 8   | <=0.5 | 1     | <=0.25 | >64 | >4    |
| <=0.5 | 8   | 16  | <=0.5 | 1     | <=0.25 | <=4 | <=0.5 |
| <=0.5 | 4   | 4   | <=0.5 | 1     | <=0.25 | <=4 | <=0.5 |
| <=0.5 | 4   | 4   | <=0.5 | <=0.5 | <=0.25 | <=4 | <=0.5 |
| <=0.5 | 4   | 4   | <=0.5 | 2     | <=0.25 | >64 | >4    |
| <=0.5 | <=2 | 2   | <=0.5 | <=0.5 | <=0.25 | <=4 | <=0.5 |
| <=0.5 | 8   | 8   | <=0.5 | 1     | <=0.25 | >64 | >4    |
| <=0.5 | <=2 | 4   | <=0.5 | <=0.5 | <=0.25 | >64 | <=0.5 |
| <=0.5 | 4   | 8   | <=0.5 | >8    | <=0.25 | >64 | >4    |
| <=0.5 | >16 | >16 | 4     | >8    | <=0.25 | >64 | >4    |
| <=0.5 | 4   | 4   | <=0.5 | <=0.5 | <=0.25 | >64 | >4    |
| <=0.5 | 4   | 4   | <=0.5 | 1     | <=0.25 | >64 | <=0.5 |
| <=0.5 | 8   | 8   | <=0.5 | >8    | <=0.25 | >64 | >4    |
| 8     | >16 | >16 | 16    | >8    | 1      | >64 | >4    |
| <=0.5 | 8   | 8   | <=0.5 | >8    | <=0.25 | >64 | >4    |
| <=0.5 | 8   | 8   | <=0.5 | >8    | <=0.25 | >64 | >4    |
| <=0.5 | <=2 | 4   | <=0.5 | 1     | <=0.25 | >64 | >4    |
| <=0.5 | 8   | 8   | <=0.5 | >8    | <=0.25 | 64  | >4    |
| <=0.5 | 4   | 4   | <=0.5 | 1     | <=0.25 | >64 | >4    |
| <=0.5 | 8   | 4   | <=0.5 | 1     | <=0.25 | <=4 | <=0.5 |
| 4     | >16 | >16 | >32   | >8    | 2      | >64 | >4    |
| <=0.5 | 8   | 8   | <=0.5 | >8    | <=0.25 | >64 | <=0.5 |
| <=0.5 | >16 | >16 | 4     | >8    | <=0.25 | 64  | >4    |
| <=0.5 | 4   | 4   | <=0.5 | 1     | <=0.25 | >64 | <=0.5 |
| <=0.5 | >16 | >16 | 8     | 1     | 0.5    | >64 | >4    |
| <=0.5 | 4   | 8   | <=0.5 | >8    | 0.5    | >64 | >4    |
| <=0.5 | 4   | 2   | <=0.5 | <=0.5 | <=0.25 | >64 | >4    |
| >16   | >16 | >16 | >32   | >8    | <=0.25 | >64 | >4    |
| <=0.5 | 4   | 2   | <=0.5 | 1     | <=0.25 | >64 | <=0.5 |
| <=0.5 | 4   | 2   | <=0.5 | >8    | <=0.25 | >64 | >4    |
| <=0.5 | <=2 | 4   | <=0.5 | 2     | <=0.25 | >64 | <=0.5 |
| <=0.5 | 4   | 8   | <=0.5 | 1     | <=0.25 | <=4 | <=0.5 |
| <=0.5 | 8   | 8   | <=0.5 | <=0.5 | <=0.25 | <=4 | 2     |
| <=0.5 | 8   | 8   | <=0.5 | 1     | <=0.25 | >64 | >4    |
| <=0.5 | 8   | 4   | <=0.5 | <=0.5 | <=0.25 | <=4 | <=0.5 |
| <=0.5 | <=2 | 4   | <=0.5 | 1     | <=0.25 | >64 | >4    |
| <=0.5 | 8   | 8   | <=0.5 | <=0.5 | <=0.25 | >64 | >4    |

|       |     |     |       |       |        |     |       |
|-------|-----|-----|-------|-------|--------|-----|-------|
| <=0.5 | 4   | 4   | <=0.5 | 1     | 1      | >64 | <=0.5 |
| <=0.5 | 4   | 8   | <=0.5 | 1     | <=0.25 | >64 | >4    |
| 2     | >16 | >16 | >32   | >8    | 1      | 64  | >4    |
| <=0.5 | 8   | 4   | <=0.5 | >8    | <=0.25 | >64 | >4    |
| <=0.5 | 8   | 4   | <=0.5 | 1     | <=0.25 | <=4 | <=0.5 |
| <=0.5 | >16 | >16 | <=0.5 | >8    | 0.5    | >64 | >4    |
| <=0.5 | 8   | 4   | <=0.5 | 1     | <=0.25 | <=4 | <=0.5 |
| <=0.5 | <=2 | 2   | <=0.5 | <=0.5 | <=0.25 | >64 | <=0.5 |
| <=0.5 | 4   | 4   | <=0.5 | <=0.5 | <=0.25 | >64 | >4    |
| <=0.5 | 8   | 4   | <=0.5 | <=0.5 | <=0.25 | >64 | <=0.5 |
| <=0.5 | >16 | 8   | <=0.5 | 2     | <=0.25 | >64 | >4    |
| <=0.5 | 8   | 4   | <=0.5 | 4     | <=0.25 | >64 | >4    |
| 2     | >16 | >16 | 32    | >8    | <=0.25 | >64 | >4    |
| 4     | >16 | >16 | >32   | >8    | 0.5    | >64 | >4    |
| <=0.5 | 8   | 4   | <=0.5 | 1     | <=0.25 | >64 | <=0.5 |
| 1     | >16 | >16 | >32   | 1     | 0.5    | >64 | >4    |
| <=0.5 | >16 | >16 | 32    | >8    | 0.5    | >64 | >4    |
| <=0.5 | 4   | 2   | <=0.5 | 1     | <=0.25 | <=4 | <=0.5 |
| <=0.5 | 4   | 4   | <=0.5 | <=0.5 | <=0.25 | <=4 | <=0.5 |
| <=0.5 | 4   | 4   | <=0.5 | <=0.5 | <=0.25 | >64 | >4    |
| >16   | 16  | >16 | >32   | >8    | <=0.25 | >64 | >4    |
| <=0.5 | >16 | >16 | 16    | >8    | <=0.25 | >64 | >4    |
| <=0.5 | 4   | 4   | <=0.5 | >8    | <=0.25 | >64 | >4    |
| <=0.5 | <=2 | 4   | <=0.5 | 1     | <=0.25 | <=4 | <=0.5 |
| <=0.5 | 4   | 4   | <=0.5 | <=0.5 | <=0.25 | <=4 | <=0.5 |
| <=0.5 | 8   | 8   | <=0.5 | 2     | <=0.25 | >64 | <=0.5 |
| <=0.5 | 8   | 4   | <=0.5 | >8    | <=0.25 | >64 | <=0.5 |
| <=0.5 | 8   | 8   | <=0.5 | 1     | <=0.25 | <=4 | <=0.5 |
| <=0.5 | <=2 | 8   | <=0.5 | >8    | <=0.25 | >64 | <=0.5 |
| <=0.5 | 8   | 4   | <=0.5 | <=0.5 | <=0.25 | >64 | >4    |
| <=0.5 | 4   | 4   | <=0.5 | >8    | <=0.25 | >64 | >4    |
| <=0.5 | 4   | 4   | <=0.5 | 1     | <=0.25 | <=4 | <=0.5 |
| <=0.5 | 4   | 4   | <=0.5 | >8    | <=0.25 | >64 | >4    |
| <=0.5 | <=2 | 2   | <=0.5 | <=0.5 | <=0.25 | <=4 | <=0.5 |
| <=0.5 | 8   | 8   | <=0.5 | <=0.5 | <=0.25 | >64 | <=0.5 |
| 16    | 8   | >16 | >32   | 1     | 0.5    | >64 | <=0.5 |
| <=0.5 | <=2 | 4   | <=0.5 | 1     | <=0.25 | >64 | <=0.5 |
| <=0.5 | <=2 | 8   | <=0.5 | <=0.5 | 0.5    | <=4 | <=0.5 |
| <=0.5 | 4   | 4   | <=0.5 | <=0.5 | <=0.25 | >64 | <=0.5 |
| <=0.5 | 4   | 8   | <=0.5 | <=0.5 | <=0.25 | <=4 | <=0.5 |
| <=0.5 | 4   | 4   | <=0.5 | 1     | <=0.25 | <=4 | <=0.5 |
| <=0.5 | <=2 | 4   | <=0.5 | 1     | <=0.25 | >64 | >4    |
| <=0.5 | <=2 | 4   | <=0.5 | <=0.5 | <=0.25 | >64 | <=0.5 |
| <=0.5 | 4   | 4   | <=0.5 | 1     | <=0.25 | <=4 | <=0.5 |
| <=0.5 | <=2 | 4   | <=0.5 | 1     | <=0.25 | >64 | <=0.5 |
| <=0.5 | <=2 | 8   | <=0.5 | >8    | <=0.25 | >64 | >4    |
| <=0.5 | 8   | 8   | <=0.5 | >8    | <=0.25 | >64 | >4    |
| <=0.5 | 4   | 4   | <=0.5 | <=0.5 | <=0.25 | 64  | >4    |
| 2     | >16 | >16 | >32   | <=0.5 | 0.5    | >64 | >4    |
| <=0.5 | 4   | 2   | <=0.5 | <=0.5 | <=0.25 | >64 | <=0.5 |
| <=0.5 | <=2 | 2   | <=0.5 | >8    | <=0.25 | <=4 | >4    |
| <=0.5 | <=2 | 2   | <=0.5 | 2     | <=0.25 | >64 | >4    |
| <=0.5 | 4   | 4   | <=0.5 | <=0.5 | <=0.25 | <=4 | <=0.5 |
| <=0.5 | 4   | 4   | <=0.5 | <=0.5 | <=0.25 | >64 | >4    |
| <=0.5 | 4   | 4   | <=0.5 | 1     | <=0.25 | <=4 | <=0.5 |
| <=0.5 | 8   | 8   | <=0.5 | 1     | <=0.25 | >64 | 4     |
| <=0.5 | 4   | 4   | <=0.5 | <=0.5 | <=0.25 | <=4 | <=0.5 |
| <=0.5 | 16  | 16  | <=0.5 | >8    | <=0.25 | >64 | >4    |
| <=0.5 | <=2 | 2   | <=0.5 | 1     | <=0.25 | <=4 | <=0.5 |
| <=0.5 | 8   | 8   | <=0.5 | 1     | <=0.25 | >64 | >4    |
| <=0.5 | >16 | >16 | 2     | <=0.5 | <=0.25 | 64  | <=0.5 |

|       |     |     |       |       |        |     |       |
|-------|-----|-----|-------|-------|--------|-----|-------|
| <=0.5 | 4   | 2   | <=0.5 | 1     | <=0.25 | >64 | <=0.5 |
| <=0.5 | 4   | 4   | <=0.5 | <=0.5 | <=0.25 | <=4 | <=0.5 |
| <=0.5 | 4   | 4   | <=0.5 | >8    | <=0.25 | >64 | >4    |
| <=0.5 | <=2 | <=1 | <=0.5 | >8    | <=0.25 | >64 | 2     |
| <=0.5 | <=2 | 4   | <=0.5 | <=0.5 | <=0.25 | >64 | >4    |
| <=0.5 | <=2 | 4   | <=0.5 | <=0.5 | <=0.25 | >64 | <=0.5 |
| <=0.5 | <=2 | 4   | <=0.5 | 1     | <=0.25 | 64  | <=0.5 |
| <=0.5 | <=2 | 2   | <=0.5 | 1     | <=0.25 | <=4 | <=0.5 |
| <=0.5 | 4   | 4   | <=0.5 | <=0.5 | <=0.25 | >64 | >4    |
| <=0.5 | 4   | 4   | <=0.5 | 1     | <=0.25 | >64 | >4    |
| <=0.5 | <=2 | 4   | <=0.5 | 2     | <=0.25 | <=4 | <=0.5 |
| <=0.5 | 4   | 2   | <=0.5 | >8    | <=0.25 | >64 | <=0.5 |
| <=0.5 | <=2 | 2   | <=0.5 | <=0.5 | <=0.25 | >64 | >4    |
| <=0.5 | 4   | 4   | <=0.5 | 1     | <=0.25 | <=4 | <=0.5 |
| <=0.5 | 4   | 4   | <=0.5 | 2     | <=0.25 | <=4 | <=0.5 |
| <=0.5 | 4   | 4   | <=0.5 | 2     | <=0.25 | >64 | <=0.5 |
| <=0.5 | 4   | 4   | <=0.5 | 1     | <=0.25 | >64 | >4    |
| <=0.5 | 4   | 4   | <=0.5 | <=0.5 | <=0.25 | >64 | >4    |
| <=0.5 | 4   | 4   | <=0.5 | <=0.5 | <=0.25 | >64 | <=0.5 |
| 1     | >16 | >16 | 32    | >8    | <=0.25 | >64 | >4    |
| <=0.5 | 4   | 4   | <=0.5 | <=0.5 | <=0.25 | <=4 | <=0.5 |
| <=0.5 | 8   | 8   | <=0.5 | 1     | <=0.25 | >64 | >4    |
| <=0.5 | 4   | 4   | <=0.5 | 2     | <=0.25 | >64 | >4    |
| <=0.5 | 8   | 4   | <=0.5 | <=0.5 | <=0.25 | <=4 | <=0.5 |
| <=0.5 | <=2 | 2   | <=0.5 | 1     | <=0.25 | <=4 | <=0.5 |
| <=0.5 | 4   | 4   | <=0.5 | <=0.5 | <=0.25 | 64  | >4    |
| <=0.5 | <=2 | 2   | <=0.5 | <=0.5 | <=0.25 | >64 | <=0.5 |
| <=0.5 | 4   | 2   | <=0.5 | >8    | <=0.25 | >64 | >4    |
| >16   | >16 | >16 | >32   | >8    | 0.5    | >64 | >4    |
| <=0.5 | 4   | 2   | <=0.5 | <=0.5 | <=0.25 | <=4 | <=0.5 |
| <=0.5 | 8   | 4   | <=0.5 | 1     | <=0.25 | >64 | >4    |
| <=0.5 | 4   | 4   | <=0.5 | >8    | <=0.25 | >64 | <=0.5 |
| <=0.5 | 8   | 4   | <=0.5 | >8    | <=0.25 | >64 | >4    |
| <=0.5 | <=2 | 4   | <=0.5 | 1     | <=0.25 | >64 | >4    |
| 4     | >16 | >16 | >32   | >8    | 0.5    | >64 | >4    |
| <=0.5 | 8   | 4   | <=0.5 | 8     | <=0.25 | 64  | >4    |
| <=0.5 | 4   | 4   | <=0.5 | <=0.5 | <=0.25 | >64 | <=0.5 |
| <=0.5 | <=2 | 8   | <=0.5 | 1     | <=0.25 | <=4 | <=0.5 |
| >16   | 8   | >16 | >32   | >8    | <=0.25 | >64 | >4    |
| <=0.5 | <=2 | 4   | <=0.5 | >8    | 0.5    | >64 | >4    |
| <=0.5 | 8   | 16  | <=0.5 | 2     | 0.5    | >64 | >4    |
| <=0.5 | 4   | 8   | <=0.5 | <=0.5 | <=0.25 | >64 | >4    |
| 1     | <=2 | 8   | <=0.5 | 1     | <=0.25 | 64  | >4    |
| <=0.5 | 4   | 4   | <=0.5 | >8    | <=0.25 | >64 | >4    |
| <=0.5 | 4   | 2   | <=0.5 | 1     | <=0.25 | >64 | >4    |
| <=0.5 | 4   | 2   | <=0.5 | 1     | <=0.25 | <=4 | <=0.5 |
| <=0.5 | <=2 | 2   | <=0.5 | 2     | <=0.25 | >64 | >4    |
| <=0.5 | 4   | 2   | <=0.5 | 1     | <=0.25 | >64 | >4    |
| <=0.5 | 8   | 4   | <=0.5 | <=0.5 | <=0.25 | <=4 | <=0.5 |
| <=0.5 | <=2 | 4   | <=0.5 | <=0.5 | <=0.25 | >64 | <=0.5 |
| <=0.5 | 4   | 4   | <=0.5 | >8    | <=0.25 | >64 | >4    |
| <=0.5 | 8   | 8   | <=0.5 | 2     | <=0.25 | 64  | >4    |
| <=0.5 | 4   | 4   | <=0.5 | 1     | <=0.25 | <=4 | <=0.5 |
| <=0.5 | <=2 | 2   | <=0.5 | <=0.5 | <=0.25 | <=4 | <=0.5 |
| <=0.5 | 8   | 4   | <=0.5 | >8    | <=0.25 | >64 | >4    |
| <=0.5 | 8   | 8   | <=0.5 | >8    | <=0.25 | >64 | <=0.5 |
| <=0.5 | 4   | 4   | <=0.5 | 1     | <=0.25 | >64 | <=0.5 |
| <=0.5 | <=2 | 2   | <=0.5 | <=0.5 | <=0.25 | <=4 | <=0.5 |
| <=0.5 | 8   | 4   | <=0.5 | >8    | <=0.25 | >64 | >4    |
| <=0.5 | 8   | 8   | <=0.5 | >8    | <=0.25 | >64 | <=0.5 |
| <=0.5 | 4   | 4   | <=0.5 | 1     | <=0.25 | >64 | <=0.5 |
| <=0.5 | >16 | >16 | 16    | 1     | <=0.25 | >64 | >4    |
| <=0.5 | 4   | 4   | <=0.5 | >8    | <=0.25 | >64 | >4    |
| <=0.5 | <=2 | 2   | <=0.5 | 1     | <=0.25 | >64 | <=0.5 |
| <=0.5 | 8   | 8   | <=0.5 | <=0.5 | <=0.25 | >64 | >4    |

|       |     |     |       |       |        |     |       |
|-------|-----|-----|-------|-------|--------|-----|-------|
| >16   | >16 | >16 | >32   | >8    | <=0.25 | >64 | >4    |
| 4     | >16 | >16 | >32   | >8    | 0.5    | >64 | >4    |
| <=0.5 | 8   | 8   | <=0.5 | >8    | <=0.25 | >64 | >4    |
| <=0.5 | 4   | 4   | <=0.5 | 2     | <=0.25 | >64 | <=0.5 |
| <=0.5 | 4   | 4   | <=0.5 | <=0.5 | <=0.25 | 64  | >4    |
| <=0.5 | <=2 | 2   | <=0.5 | >8    | <=0.25 | >64 | >4    |
| <=0.5 | 4   | 4   | <=0.5 | 1     | <=0.25 | 64  | >4    |
| <=0.5 | 8   | 4   | <=0.5 | 1     | <=0.25 | <=4 | <=0.5 |
| <=0.5 | <=2 | 4   | <=0.5 | >8    | <=0.25 | >64 | >4    |
| <=0.5 | <=2 | 4   | <=0.5 | <=0.5 | <=0.25 | <=4 | <=0.5 |
| <=0.5 | <=2 | 4   | <=0.5 | 1     | <=0.25 | >64 | <=0.5 |
| <=0.5 | <=2 | 2   | <=0.5 | 1     | <=0.25 | >64 | <=0.5 |
| 8     | 8   | >16 | >32   | 1     | <=0.25 | >64 | >4    |
| <=0.5 | 8   | 16  | 1     | <=0.5 | <=0.25 | 16  | <=0.5 |
| <=0.5 | <=2 | 2   | <=0.5 | 1     | <=0.25 | <=4 | <=0.5 |
| <=0.5 | 4   | 4   | <=0.5 | >8    | <=0.25 | >64 | >4    |
| <=0.5 | 4   | <=1 | <=0.5 | 1     | <=0.25 | 64  | <=0.5 |
| <=0.5 | 8   | 8   | <=0.5 | 2     | <=0.25 | >64 | <=0.5 |
| <=0.5 | 4   | 4   | <=0.5 | <=0.5 | <=0.25 | <=4 | >4    |
| <=0.5 | 4   | 4   | <=0.5 | >8    | <=0.25 | >64 | >4    |
| <=0.5 | <=2 | 2   | <=0.5 | 2     | <=0.25 | <=4 | <=0.5 |
| <=0.5 | >16 | >16 | 8     | >8    | <=0.25 | >64 | >4    |
| <=0.5 | <=2 | <=1 | <=0.5 | <=0.5 | <=0.25 | >64 | <=0.5 |
| 1     | >16 | >16 | 16    | >8    | <=0.25 | >64 | >4    |
| <=0.5 | 4   | 4   | <=0.5 | <=0.5 | <=0.25 | <=4 | <=0.5 |
| <=0.5 | 4   | 4   | <=0.5 | 1     | <=0.25 | 32  | >4    |
| <=0.5 | 16  | 16  | <=0.5 | 2     | <=0.25 | 8   | <=0.5 |
| <=0.5 | 4   | 2   | <=0.5 | 1     | <=0.25 | >64 | >4    |
| <=0.5 | 4   | 8   | <=0.5 | <=0.5 | <=0.25 | <=4 | <=0.5 |
| <=0.5 | 8   | 8   | <=0.5 | >8    | <=0.25 | >64 | >4    |
| <=0.5 | 4   | 2   | <=0.5 | <=0.5 | <=0.25 | <=4 | <=0.5 |
| <=0.5 | <=2 | 4   | <=0.5 | 1     | <=0.25 | <=4 | <=0.5 |
| <=0.5 | 4   | 2   | <=0.5 | 1     | <=0.25 | >64 | <=0.5 |
| 8     | >16 | >16 | >32   | >8    | <=0.25 | >64 | >4    |
| <=0.5 | 4   | 4   | <=0.5 | <=0.5 | <=0.25 | <=4 | <=0.5 |
| 8     | >16 | >16 | >32   | >8    | <=0.25 | >64 | >4    |
| <=0.5 | <=2 | 2   | <=0.5 | <=0.5 | <=0.25 | 64  | >4    |
| <=0.5 | <=2 | 2   | <=0.5 | 1     | <=0.25 | <=4 | <=0.5 |
| <=0.5 | >16 | >16 | 16    | >8    | 0.5    | 32  | 1     |
| <=0.5 | <=2 | 4   | <=0.5 | 1     | <=0.25 | >64 | <=0.5 |
| <=0.5 | 4   | 4   | <=0.5 | 1     | <=0.25 | <=4 | <=0.5 |
| <=0.5 | 4   | 8   | <=0.5 | 1     | <=0.25 | <=4 | <=0.5 |
| <=0.5 | <=2 | 2   | <=0.5 | <=0.5 | <=0.25 | <=4 | <=0.5 |
| <=0.5 | 8   | 2   | <=0.5 | <=0.5 | <=0.25 | >64 | >4    |
| <=0.5 | 8   | 4   | <=0.5 | <=0.5 | <=0.25 | >64 | <=0.5 |
| <=0.5 | 4   | 2   | <=0.5 | <=0.5 | <=0.25 | >64 | >4    |
| <=0.5 | 4   | 4   | <=0.5 | <=0.5 | <=0.25 | 64  | >4    |
| <=0.5 | <=2 | 4   | <=0.5 | 1     | <=0.25 | <=4 | <=0.5 |
| <=0.5 | <=2 | 2   | <=0.5 | <=0.5 | 0.5    | >64 | >4    |
| 1     | 4   | 2   | <=0.5 | 1     | <=0.25 | <=4 | <=0.5 |
| <=0.5 | <=2 | 4   | <=0.5 | 1     | <=0.25 | >64 | >4    |
| 16    | 4   | >16 | >32   | <=0.5 | <=0.25 | >64 | >4    |
| <=0.5 | 4   | 4   | <=0.5 | 1     | <=0.25 | >64 | >4    |
| <=0.5 | <=2 | 2   | <=0.5 | <=0.5 | <=0.25 | >64 | >4    |
| <=0.5 | >16 | 16  | 1     | >8    | <=0.25 | >64 | >4    |
| <=0.5 | >16 | >16 | >32   | >8    | <=0.25 | 64  | >4    |
| <=0.5 | 4   | 4   | <=0.5 | 1     | <=0.25 | <=4 | <=0.5 |
| <=0.5 | <=2 | 2   | <=0.5 | <=0.5 | <=0.25 | <=4 | <=0.5 |
| <=0.5 | <=2 | 4   | <=0.5 | 2     | <=0.25 | <=4 | >4    |
| <=0.5 | 4   | 4   | <=0.5 | >8    | <=0.25 | >64 | <=0.5 |
| <=0.5 | 16  | 16  | <=0.5 | 1     | <=0.25 | <=4 | <=0.5 |



|       |     |     |       |       |        |     |       |
|-------|-----|-----|-------|-------|--------|-----|-------|
| <=0.5 | 4   | 4   | <=0.5 | 2     | <=0.25 | >64 | <=0.5 |
| <=0.5 | 4   | 4   | <=0.5 | <=0.5 | <=0.25 | >64 | >4    |
| <=0.5 | <=2 | 4   | <=0.5 | <=0.5 | <=0.25 | >64 | >4    |
| <=0.5 | <=2 | 4   | <=0.5 | 1     | <=0.25 | <=4 | 2     |
| <=0.5 | 4   | 8   | <=0.5 | 1     | 0.5    | <=4 | <=0.5 |
| <=0.5 | <=2 | 2   | <=0.5 | >8    | <=0.25 | >64 | <=0.5 |
| <=0.5 | <=2 | 4   | <=0.5 | <=0.5 | <=0.25 | >64 | >4    |
| <=0.5 | 8   | 4   | <=0.5 | 2     | <=0.25 | >64 | >4    |
| <=0.5 | 4   | 4   | <=0.5 | 1     | <=0.25 | <=4 | <=0.5 |
| <=0.5 | >16 | >16 | 8     | 1     | 1      | 64  | 1     |
| >16   | 8   | >16 | >32   | 1     | <=0.25 | >64 | 2     |
| <=0.5 | <=2 | 2   | <=0.5 | 1     | <=0.25 | <=4 | <=0.5 |
| <=0.5 | <=2 | 4   | <=0.5 | 1     | <=0.25 | >64 | <=0.5 |
| <=0.5 | 8   | 8   | <=0.5 | 1     | <=0.25 | >64 | >4    |
| <=0.5 | <=2 | 4   | <=0.5 | 1     | <=0.25 | >64 | <=0.5 |
| <=0.5 | >16 | >16 | 32    | >8    | <=0.25 | >64 | >4    |
| <=0.5 | 4   | 2   | <=0.5 | 1     | <=0.25 | <=4 | <=0.5 |
| <=0.5 | 4   | 4   | <=0.5 | 1     | <=0.25 | >64 | >4    |
| <=0.5 | <=2 | 8   | <=0.5 | 1     | <=0.25 | >64 | >4    |
| <=0.5 | 4   | 8   | <=0.5 | 1     | <=0.25 | <=4 | >4    |
| <=0.5 | 4   | 4   | <=0.5 | <=0.5 | <=0.25 | <=4 | <=0.5 |
| <=0.5 | 8   | 4   | <=0.5 | <=0.5 | <=0.25 | <=4 | <=0.5 |
| <=0.5 | <=2 | 2   | <=0.5 | <=0.5 | <=0.25 | <=4 | <=0.5 |
| <=0.5 | 4   | 4   | <=0.5 | 1     | <=0.25 | >64 | >4    |
| <=0.5 | <=2 | 2   | <=0.5 | 1     | <=0.25 | <=4 | <=0.5 |
| <=0.5 | <=2 | 4   | <=0.5 | <=0.5 | <=0.25 | <=4 | 2     |
| <=0.5 | >16 | >16 | 8     | 2     | <=0.25 | >64 | >4    |
| <=0.5 | >16 | 8   | <=0.5 | 1     | <=0.25 | <=4 | <=0.5 |
| >16   | 16  | >16 | >32   | >8    | <=0.25 | >64 | >4    |
| <=0.5 | 4   | 4   | <=0.5 | >8    | <=0.25 | >64 | >4    |
| <=0.5 | <=2 | 4   | <=0.5 | <=0.5 | <=0.25 | >64 | >4    |
| <=0.5 | >16 | >16 | 16    | >8    | <=0.25 | >64 | >4    |
| <=0.5 | <=2 | 2   | <=0.5 | <=0.5 | <=0.25 | <=4 | <=0.5 |
| <=0.5 | 4   | 2   | <=0.5 | 1     | <=0.25 | >64 | >4    |
| <=0.5 | <=2 | 4   | <=0.5 | <=0.5 | <=0.25 | >64 | <=0.5 |
| <=0.5 | <=2 | 2   | <=0.5 | 1     | <=0.25 | >64 | >4    |
| <=0.5 | 8   | >16 | <=0.5 | <=0.5 | <=0.25 | >64 | <=0.5 |
| <=0.5 | >16 | >16 | 4     | >8    | <=0.25 | >64 | >4    |
| <=0.5 | 4   | 4   | <=0.5 | <=0.5 | <=0.25 | >64 | <=0.5 |
| <=0.5 | 4   | 8   | <=0.5 | 1     | <=0.25 | >64 | >4    |
| <=0.5 | 4   | 4   | <=0.5 | 2     | <=0.25 | >64 | <=0.5 |
| <=0.5 | >16 | >16 | 32    | >8    | <=0.25 | >64 | >4    |
| <=0.5 | 4   | 4   | <=0.5 | 1     | <=0.25 | >64 | >4    |
| <=0.5 | >16 | >16 | 8     | >8    | 0.5    | >64 | >4    |
| <=0.5 | 4   | 4   | <=0.5 | <=0.5 | <=0.25 | <=4 | <=0.5 |
| <=0.5 | 4   | 4   | <=0.5 | <=0.5 | <=0.25 | <=4 | >4    |
| <=0.5 | <=2 | 2   | <=0.5 | <=0.5 | <=0.25 | >64 | <=0.5 |
| <=0.5 | <=2 | 2   | <=0.5 | <=0.5 | <=0.25 | <=4 | <=0.5 |
| <=0.5 | 4   | 4   | <=0.5 | <=0.5 | <=0.25 | 64  | >4    |
| <=0.5 | 4   | 4   | <=0.5 | 1     | <=0.25 | <=4 | <=0.5 |
| <=0.5 | <=2 | <=1 | <=0.5 | 1     | <=0.25 | <=4 | <=0.5 |
| <=0.5 | <=2 | 4   | <=0.5 | <=0.5 | <=0.25 | >64 | <=0.5 |
| <=0.5 | 4   | 4   | <=0.5 | 1     | <=0.25 | >64 | <=0.5 |
| <=0.5 | <=2 | 2   | <=0.5 | <=0.5 | <=0.25 | <=4 | <=0.5 |
| <=0.5 | <=2 | 2   | <=0.5 | 1     | <=0.25 | <=4 | <=0.5 |
| <=0.5 | 4   | 4   | <=0.5 | 2     | <=0.25 | >64 | >4    |
| <=0.5 | 4   | 4   | <=0.5 | 1     | <=0.25 | >64 | >4    |
| <=0.5 | <=2 | 4   | <=0.5 | <=0.5 | <=0.25 | >64 | >4    |
| <=0.5 | 4   | 2   | <=0.5 | 1     | <=0.25 | >64 | <=0.5 |
| <=0.5 | <=2 | 4   | <=0.5 | 1     | <=0.25 | <=4 | <=0.5 |
| <=0.5 | 8   | 4   | <=0.5 | 1     | <=0.25 | <=4 | <=0.5 |

|       |     |     |       |       |        |     |       |
|-------|-----|-----|-------|-------|--------|-----|-------|
| 16    | >16 | >16 | >32   | >8    | <=0.25 | >64 | >4    |
| <=0.5 | <=2 | 4   | <=0.5 | 1     | <=0.25 | >64 | <=0.5 |
| <=0.5 | 4   | 4   | <=0.5 | 1     | <=0.25 | <=4 | >4    |
| <=0.5 | 4   | 4   | <=0.5 | 1     | <=0.25 | <=4 | <=0.5 |
| <=0.5 | 8   | 4   | <=0.5 | <=0.5 | <=0.25 | >64 | >4    |
| <=0.5 | 4   | 4   | <=0.5 | 1     | <=0.25 | >64 | <=0.5 |
| <=0.5 | 4   | 4   | <=0.5 | 1     | <=0.25 | >64 | <=0.5 |
| <=0.5 | 4   | 4   | <=0.5 | >8    | <=0.25 | >64 | >4    |
| <=0.5 | 4   | 4   | <=0.5 | 1     | <=0.25 | >64 | >4    |
| <=0.5 | <=2 | 4   | <=0.5 | <=0.5 | <=0.25 | <=4 | <=0.5 |
| <=0.5 | <=2 | 2   | <=0.5 | 1     | <=0.25 | <=4 | >4    |
| <=0.5 | 4   | 8   | <=0.5 | 1     | <=0.25 | >64 | <=0.5 |
| <=0.5 | 8   | 8   | <=0.5 | >8    | <=0.25 | >64 | >4    |
| <=0.5 | 8   | 8   | <=0.5 | 1     | <=0.25 | >64 | >4    |
| <=0.5 | 4   | 8   | <=0.5 | 1     | <=0.25 | >64 | >4    |
| <=0.5 | 4   | 4   | <=0.5 | <=0.5 | <=0.25 | <=4 | >4    |
| 2     | >16 | >16 | >32   | 1     | 0.5    | >64 | >4    |
| <=0.5 | 4   | 4   | <=0.5 | 1     | <=0.25 | >64 | <=0.5 |
| <=0.5 | >16 | >16 | 32    | >8    | <=0.25 | >64 | >4    |
| <=0.5 | 4   | 4   | <=0.5 | 1     | <=0.25 | >64 | >4    |
| <=0.5 | <=2 | 2   | <=0.5 | 1     | <=0.25 | >64 | <=0.5 |
| <=0.5 | <=2 | 4   | <=0.5 | <=0.5 | <=0.25 | <=4 | <=0.5 |
| <=0.5 | <=2 | 4   | <=0.5 | <=0.5 | <=0.25 | <=4 | <=0.5 |
| <=0.5 | 8   | 8   | <=0.5 | >8    | <=0.25 | >64 | >4    |
| <=0.5 | <=2 | 2   | <=0.5 | <=0.5 | <=0.25 | >64 | >4    |
| <=0.5 | <=2 | 2   | <=0.5 | <=0.5 | <=0.25 | >64 | >4    |
| <=0.5 | <=2 | 2   | <=0.5 | <=0.5 | <=0.25 | >64 | >4    |
| <=0.5 | 4   | 4   | <=0.5 | 1     | <=0.25 | >64 | >4    |
| <=0.5 | <=2 | 4   | <=0.5 | >8    | <=0.25 | <=4 | >4    |
| <=0.5 | <=2 | 4   | <=0.5 | >8    | <=0.25 | >64 | >4    |
| <=0.5 | 4   | 4   | <=0.5 | 1     | <=0.25 | >64 | <=0.5 |
| <=0.5 | <=2 | 4   | <=0.5 | <=0.5 | <=0.25 | <=4 | <=0.5 |
| <=0.5 | 4   | 8   | <=0.5 | >8    | <=0.25 | >64 | >4    |
| <=0.5 | >16 | >16 | 8     | >8    | <=0.25 | >64 | >4    |
| <=0.5 | 4   | 4   | <=0.5 | <=0.5 | <=0.25 | <=4 | <=0.5 |
| <=0.5 | 4   | 4   | <=0.5 | 1     | <=0.25 | >64 | >4    |
| <=0.5 | 4   | 8   | <=0.5 | >8    | <=0.25 | >64 | >4    |
| <=0.5 | 4   | 4   | <=0.5 | >8    | <=0.25 | >64 | <=0.5 |
| <=0.5 | >16 | >16 | 8     | <=0.5 | <=0.25 | >64 | <=0.5 |
| <=0.5 | 8   | 8   | <=0.5 | 8     | <=0.25 | >64 | >4    |
| <=0.5 | 4   | 4   | <=0.5 | 1     | <=0.25 | >64 | >4    |
| <=0.5 | 4   | 2   | <=0.5 | 1     | <=0.25 | >64 | >4    |
| <=0.5 | <=2 | 2   | <=0.5 | 1     | <=0.25 | >64 | <=0.5 |
| <=0.5 | <=2 | 4   | <=0.5 | 1     | <=0.25 | >64 | >4    |
| <=0.5 | 4   | 4   | <=0.5 | 1     | <=0.25 | 64  | >4    |
| <=0.5 | 8   | 4   | <=0.5 | 1     | <=0.25 | >64 | >4    |
| <=0.5 | 4   | 4   | <=0.5 | 1     | <=0.25 | >64 | <=0.5 |
| <=0.5 | <=2 | 4   | <=0.5 | >8    | <=0.25 | >64 | >4    |
| <=0.5 | 16  | 8   | <=0.5 | >8    | <=0.25 | >64 | <=0.5 |
| <=0.5 | 8   | 4   | <=0.5 | 1     | <=0.25 | <=4 | <=0.5 |
| <=0.5 | 4   | 4   | <=0.5 | >8    | <=0.25 | <=4 | >4    |
| <=0.5 | 4   | 4   | <=0.5 | 1     | <=0.25 | >64 | <=0.5 |
| <=0.5 | 8   | 8   | <=0.5 | 1     | 0.5    | >64 | <=0.5 |
| <=0.5 | 4   | 4   | <=0.5 | 1     | <=0.25 | <=4 | <=0.5 |
| <=0.5 | 4   | 4   | <=0.5 | 1     | <=0.25 | 32  | >4    |
| <=0.5 | 4   | 8   | <=0.5 | 1     | <=0.25 | <=4 | <=0.5 |
| <=0.5 | 8   | 8   | <=0.5 | >8    | <=0.25 | >64 | <=0.5 |
| <=0.5 | 4   | 8   | <=0.5 | >8    | <=0.25 | >64 | >4    |
| <=0.5 | 4   | 4   | <=0.5 | 1     | <=0.25 | >64 | >4    |
| <=0.5 | 4   | 4   | <=0.5 | 1     | <=0.25 | <=4 | <=0.5 |
| 2     | >16 | >16 | 16    | >8    | 0.5    | >64 | >4    |

|     |       |     |     |       |       |        |     |       |
|-----|-------|-----|-----|-------|-------|--------|-----|-------|
|     | <=0.5 | 8   | 4   | <=0.5 | 1     | <=0.25 | >64 | >4    |
|     | <=0.5 | 4   | 2   | <=0.5 | >8    | <=0.25 | >64 | >4    |
|     | <=0.5 | <=2 | 2   | <=0.5 | 1     | 1      | >64 | >4    |
|     | <=0.5 | 4   | 4   | <=0.5 | 1     | <=0.25 | <=4 | <=0.5 |
|     | <=0.5 | <=2 | 4   | <=0.5 | 2     | <=0.25 | <=4 | <=0.5 |
|     | <=0.5 | >16 | >16 | 8     | <=0.5 | <=0.25 | >64 | <=0.5 |
|     | <=0.5 | 4   | 4   | <=0.5 | 1     | <=0.25 | >64 | >4    |
|     | <=0.5 | 4   | 4   | <=0.5 | <=0.5 | <=0.25 | >64 | >4    |
|     | >16   | 16  | >16 | >32   | >8    | <=0.25 | >64 | >4    |
|     | 1     | >16 | >16 | 32    | >8    | 0.5    | >64 | >4    |
|     | <=0.5 | <=2 | 2   | <=0.5 | <=0.5 | <=0.25 | >64 | >4    |
|     | <=0.5 | 4   | 8   | <=0.5 | 1     | <=0.25 | >64 | >4    |
|     | <=0.5 | 4   | 8   | <=0.5 | 1     | <=0.25 | >64 | <=0.5 |
| 0.5 | <=0.5 | >16 | >16 | 8     | 2     | 0.5    | 64  | <=0.5 |
|     | >16   | >16 | >16 | >32   | >8    | 2      | >64 | >4    |
|     | >16   | 16  | >16 | >32   | 1     | <=0.25 | >64 | <=0.5 |
|     | <=0.5 | 4   | 4   | <=0.5 | 1     | <=0.25 | <=4 | <=0.5 |
|     | <=0.5 | <=2 | 2   | <=0.5 | 1     | <=0.25 | >64 | <=0.5 |
|     | 4     | >16 | >16 | 32    | >8    | <=0.25 | >64 | >4    |
|     | <=0.5 | 4   | 4   | <=0.5 | 8     | <=0.25 | >64 | <=0.5 |
|     | <=0.5 | 16  | 8   | <=0.5 | 1     | <=0.25 | <=4 | <=0.5 |
|     | <=0.5 | 4   | 8   | <=0.5 | 1     | <=0.25 | >64 | >4    |
|     | <=0.5 | 16  | 4   | <=0.5 | >8    | <=0.25 | >64 | >4    |
| 0.5 | <=0.5 | >16 | >16 | 4     | >8    | <=0.25 | >64 | <=0.5 |
|     | <=0.5 | >16 | >16 | 16    | 8     | 1      | >64 | >4    |
|     | <=0.5 | 8   | 16  | <=0.5 | >8    | <=0.25 | >64 | >4    |
|     | <=0.5 | <=2 | 2   | <=0.5 | 1     | <=0.25 | >64 | >4    |
|     | <=0.5 | 4   | 2   | <=0.5 | 1     | <=0.25 | <=4 | <=0.5 |
|     | <=0.5 | 4   | 8   | <=0.5 | 2     | <=0.25 | >64 | <=0.5 |
|     | <=0.5 | 4   | 8   | <=0.5 | 1     | <=0.25 | >64 | <=0.5 |
|     | <=0.5 | <=2 | 2   | <=0.5 | >8    | <=0.25 | >64 | >4    |
|     | <=0.5 | 4   | 2   | <=0.5 | 1     | <=0.25 | >64 | <=0.5 |
|     | <=0.5 | 8   | 4   | <=0.5 | 1     | <=0.25 | <=4 | <=0.5 |
|     | >16   | >16 | >16 | >32   | >8    | 0.5    | >64 | >4    |
|     | <=0.5 | 8   | 8   | <=0.5 | 1     | <=0.25 | >64 | <=0.5 |
|     | <=0.5 | <=2 | 2   | <=0.5 | <=0.5 | <=0.25 | <=4 | <=0.5 |
|     | <=0.5 | 4   | 4   | <=0.5 | <=0.5 | <=0.25 | >64 | <=0.5 |
|     | <=0.5 | 4   | 8   | <=0.5 | 1     | <=0.25 | <=4 | <=0.5 |
|     | <=0.5 | 4   | 4   | <=0.5 | >8    | <=0.25 | >64 | >4    |
|     | <=0.5 | 4   | 4   | <=0.5 | >8    | <=0.25 | >64 | >4    |
|     | <=0.5 | 8   | 8   | <=0.5 | >8    | <=0.25 | >64 | >4    |
|     | <=0.5 | <=2 | 4   | <=0.5 | <=0.5 | <=0.25 | <=4 | <=0.5 |
|     | <=0.5 | 4   | 8   | <=0.5 | 2     | <=0.25 | <=4 | <=0.5 |
|     | <=0.5 | 8   | 4   | <=0.5 | 1     | <=0.25 | >64 | >4    |
|     | <=0.5 | <=2 | 4   | <=0.5 | 1     | <=0.25 | <=4 | <=0.5 |
|     | <=0.5 | 4   | 4   | <=0.5 | <=0.5 | <=0.25 | <=4 | <=0.5 |
|     | <=0.5 | 8   | 8   | <=0.5 | <=0.5 | <=0.25 | >64 | <=0.5 |
|     | <=0.5 | 4   | 8   | <=0.5 | 1     | <=0.25 | <=4 | <=0.5 |
|     | <=0.5 | 4   | 4   | <=0.5 | 1     | <=0.25 | <=4 | <=0.5 |
|     | <=0.5 | 4   | 4   | <=0.5 | 1     | <=0.25 | <=4 | <=0.5 |
|     | <=0.5 | 4   | 8   | <=0.5 | >8    | <=0.25 | >64 | <=0.5 |
|     | <=0.5 | 8   | 4   | <=0.5 | 2     | <=0.25 | <=4 | <=0.5 |
|     | <=0.5 | <=2 | 4   | <=0.5 | 1     | <=0.25 | >64 | >4    |
|     | <=0.5 | 4   | 4   | <=0.5 | 1     | <=0.25 | <=4 | <=0.5 |
|     | 1     | >16 | >16 | 32    | <=0.5 | 0.5    | >64 | >4    |
|     | <=0.5 | 4   | 8   | <=0.5 | <=0.5 | <=0.25 | <=4 | <=0.5 |
|     | <=0.5 | 8   | 16  | <=0.5 | 1     | <=0.25 | >64 | >4    |
|     | <=0.5 | 4   | 4   | <=0.5 | 1     | <=0.25 | <=4 | <=0.5 |
|     | <=0.5 | 8   | 8   | <=0.5 | 1     | 0.5    | >64 | <=0.5 |
|     | <=0.5 | <=2 | 2   | <=0.5 | 1     | <=0.25 | <=4 | <=0.5 |
|     | <=0.5 | 4   | 4   | <=0.5 | 1     | <=0.25 | <=4 | <=0.5 |
|     | 16    | 4   | >16 | >32   | >8    | <=0.25 | >64 | <=0.5 |



|     |     |     |     |     |        |     |       |
|-----|-----|-----|-----|-----|--------|-----|-------|
| <=1 | >16 | >16 | 8   | >8  | <=0.5  | >64 | >4    |
| <=1 | <=4 | 4   | <=1 | <=1 | <=0.25 |     | <=0.5 |
| <=1 | <=4 | 4   | <=1 | <=1 | <=0.25 |     | >2    |
| 2   | 16  | >16 | >32 | >8  | <=0.25 |     | 2     |
| <=1 | <=4 | 4   | <=1 | <=1 | <=0.25 |     | <=0.5 |
| <=1 | <=4 | 8   | <=1 | >8  | <=0.25 |     | >2    |
| <=1 | <=4 | 4   | <=1 | >8  | <=0.25 |     | >2    |
| 2   | >16 | >16 | >32 | >8  | 1      | >64 | >4    |
| <=1 | <=4 | 4   | <=1 | <=1 | <=0.5  | <=4 | <=0.5 |
| <=1 | <=4 | 4   | <=1 | <=1 | <=0.5  | <=4 | <=0.5 |
| <=1 | <=4 | 4   | <=1 | <=1 | <=0.5  | >64 | <=0.5 |
| <=1 | 8   | 8   | <=1 | >8  | <=0.5  | >64 | >2    |
| <=1 | <=4 | 4   | <=1 | <=1 | <=0.5  | >64 | <=0.5 |
| <=1 | >16 | >16 | 16  | <=1 | <=0.25 |     | <=0.5 |
| <=1 | 8   | 8   | <=1 | <=1 | <=0.25 |     | >2    |
| <=1 | <=4 | 4   | <=1 | <=1 | <=0.25 |     | <=0.5 |
| <=1 | >16 | >16 | 8   | <=1 | <=0.25 |     | >2    |
| <=1 | <=4 | 4   | <=1 | <=1 | <=0.25 |     | <=0.5 |
| >16 | <=4 | >16 | >32 | >8  | <=0.25 |     | >2    |
| <=1 | <=4 | <=2 | <=1 | <=1 | <=0.25 |     | <=0.5 |
| <=1 | <=4 | 4   | <=1 | <=1 | <=0.25 |     | >2    |
| <=1 | >16 | >16 | 8   | <=1 | <=0.25 |     | <=0.5 |
| <=1 | >16 | 16  | 4   | <=1 | <=0.25 |     | >2    |
| <=1 | <=4 | <=2 | <=1 | <=1 | <=0.25 |     | >2    |
| <=1 | <=4 | <=2 | <=1 | <=1 | <=0.25 |     | <=0.5 |
| <=1 | <=4 | 4   | <=1 | <=1 | <=0.25 |     | <=0.5 |
| <=1 | 8   | 4   | <=1 | <=1 | <=0.25 |     | >2    |
| 4   | >16 | >16 | 16  | >8  | <=0.25 |     | <=0.5 |
| <=1 | 8   | 4   | <=1 | <=1 | <=0.5  | 32  | >2    |
| <=1 | <=4 | 4   | <=1 | <=1 | <=0.5  | >64 | >2    |
| <=1 | <=4 | 4   | <=1 | <=1 | <=0.5  | <=4 | <=0.5 |
| <=1 | <=4 | 4   | <=1 | 2   | <=0.5  | >64 | >2    |
| <=1 | 8   | 4   | <=1 | <=1 | <=0.25 |     | >2    |
| <=1 | <=4 | 4   | <=1 | <=1 | <=0.25 |     | <=0.5 |
| <=1 | <=4 | 4   | <=1 | >8  | <=0.5  | >64 | >2    |
| <=1 | <=4 | 4   | <=1 | <=1 | <=0.5  | <=4 | <=0.5 |
| <=1 | 8   | 4   | <=1 | <=1 | <=0.5  | <=4 | <=0.5 |
| <=1 | >16 | >16 | <=1 | >8  | <=0.5  | >64 | <=0.5 |
| <=1 | <=4 | 4   | <=1 | <=1 | <=0.5  | <=4 | <=0.5 |
| <=1 | <=4 | 4   | <=1 | <=1 | <=0.5  | <=4 | <=0.5 |
| <=1 | <=4 | 4   | <=1 | <=1 | <=0.25 |     | <=0.5 |
| <=1 | 8   | 8   | <=1 | >8  | <=0.5  | >64 | >2    |
| <=1 | <=4 | 4   | <=1 | <=1 | <=0.5  | <=4 | <=0.5 |
| <=1 | 8   | 8   | <=1 | <=1 | <=0.5  | >64 | >2    |
| <=1 | <=4 | 8   | <=1 | <=1 | <=0.5  | >64 | >2    |
| <=1 | <=4 | 4   | <=1 | <=1 | <=0.5  | >64 | <=0.5 |
| <=1 | <=4 | 4   | <=1 | <=1 | <=0.25 |     | <=0.5 |
| >16 | 8   | >16 | >32 | <=1 | <=0.25 |     | >2    |
| <=1 | <=4 | <=2 | <=1 | <=1 | <=0.25 |     | <=0.5 |
| <=1 | 8   | 4   | <=1 | <=1 | <=0.25 |     | >2    |
| <=1 | <=4 | 4   | <=1 | >8  | <=0.25 |     | >2    |
| <=1 | <=4 | 4   | <=1 | <=1 | <=0.25 |     | >2    |
| <=1 | 8   | 4   | <=1 | <=1 | <=0.25 |     | <=0.5 |
| <=1 | <=4 | 4   | <=1 | <=1 | <=0.5  | 64  | >2    |
| <=1 | <=4 | 4   | <=1 | <=1 | <=0.25 |     | <=0.5 |
| <=1 | <=4 | <=2 | <=1 | <=1 | <=0.25 |     | <=0.5 |
| <=1 | <=4 | 4   | <=1 | <=1 | <=0.25 |     | >2    |
| 8   | <=4 | >16 | 32  | <=1 | <=0.5  | >64 | >4    |
| <=1 | <=4 | 8   | <=1 | <=1 | <=0.5  | <=4 | <=0.5 |
| <=1 | <=4 | 4   | <=1 | <=1 | <=0.5  | <=4 | <=0.5 |
| <=1 | <=4 | 8   | <=1 | <=1 | <=0.5  | >64 | >2    |

|     |     |     |     |     |        |       |       |
|-----|-----|-----|-----|-----|--------|-------|-------|
| <=1 | 8   | 4   | <=1 | <=1 | <=0.25 | <=0.5 |       |
| <=1 | <=4 | 4   | <=1 | <=1 | <=0.25 | <=0.5 |       |
| >16 | >16 | >16 | >32 | >8  | 0.5    | >2    |       |
| >16 | >16 | >16 | >32 | >8  | <=0.25 | >2    |       |
| <=1 | 8   | 4   | <=1 | <=1 | <=0.25 | <=0.5 |       |
| <=1 | <=4 | 4   | <=1 | <=1 | <=0.25 | >2    |       |
| <=1 | 16  | 4   | <=1 | <=1 | <=0.25 | <=0.5 |       |
| <=1 | <=4 | 8   | <=1 | 2   | <=0.5  | >64   | >2    |
| <=1 | >16 | >16 | 8   | >8  | <=0.5  | >64   | >4    |
| <=1 | <=4 | <=2 | <=1 | <=1 | <=0.25 | >2    |       |
| <=1 | <=4 | 4   | <=1 | <=1 | <=0.25 | <=0.5 |       |
| <=1 | <=4 | 8   | <=1 | <=1 | <=0.25 | <=0.5 |       |
| <=1 | <=4 | 4   | <=1 | <=1 | <=0.25 | <=0.5 |       |
| <=1 | <=4 | 8   | <=1 | <=1 | <=0.25 | <=0.5 |       |
| <=1 | <=4 | 8   | <=1 | <=1 | <=0.25 | <=0.5 |       |
| >16 | >16 | >16 | >32 | >8  | <=0.5  | >64   | <=0.5 |
| <=1 | >16 | >16 | 16  | <=1 | <=0.25 | >2    |       |
| <=1 | <=4 | <=2 | <=1 | 4   | <=0.25 | >2    |       |
| <=1 | <=4 | 8   | <=1 | 2   | <=0.25 | <=0.5 |       |
| >16 | 8   | >16 | >32 | >8  | <=0.5  | >64   | >4    |
| <=1 | >16 | >16 | 8   | <=1 | <=0.25 | >2    |       |
| <=1 | <=4 | 4   | <=1 | <=1 | <=0.25 | >2    |       |
| <=1 | <=4 | 4   | <=1 | <=1 | <=0.25 | <=0.5 |       |
| <=1 | <=4 | 4   | <=1 | <=1 | <=0.25 | >2    |       |
| <=1 | <=4 | 4   | <=1 | <=1 | <=0.25 | >2    |       |
| <=1 | <=4 | 4   | <=1 | >8  | <=0.25 | >2    |       |
| <=1 | <=4 | 8   | <=1 | <=1 | <=0.5  | >64   | >2    |
| >16 | >16 | >16 | >32 | >8  | <=0.5  | >64   | <=0.5 |
| <=1 | <=4 | 8   | <=1 | <=1 | <=0.5  | 8     | <=0.5 |
| 2   | >16 | >16 | >32 | <=1 | <=0.25 | >2    |       |
| <=1 | 8   | 4   | <=1 | <=1 | <=0.25 | >2    |       |
| <=1 | >16 | >16 | 8   | >8  | <=0.25 | <=0.5 |       |
| <=1 | <=4 | 4   | <=1 | >8  | <=0.25 | >2    |       |
| <=1 | <=4 | 4   | <=1 | <=1 | <=0.25 | >2    |       |
| <=1 | <=4 | 4   | <=1 | <=1 | <=0.25 | >2    |       |
| <=1 | <=4 | 4   | <=1 | <=1 | <=0.25 | >2    |       |
| <=1 | <=4 | <=2 | <=1 | <=1 | <=0.25 | >2    |       |
| 8   | <=4 | >16 | >32 | >8  | <=0.25 | >2    |       |
| <=1 | >16 | >16 | 8   | <=1 | <=0.25 | >2    |       |
| <=1 | 8   | 4   | <=1 | <=1 | <=0.25 | >2    |       |
| <=1 | <=4 | <=2 | <=1 | <=1 | <=0.25 | <=0.5 |       |
| <=1 | 8   | 4   | <=1 | <=1 | <=0.25 | >2    |       |
| <=1 | <=4 | 4   | <=1 | <=1 | <=0.25 | <=0.5 |       |
| <=1 | <=4 | 4   | <=1 | <=1 | <=0.25 | <=0.5 |       |
| <=1 | <=4 | 4   | <=1 | <=1 | <=0.25 | <=0.5 |       |
| <=1 | >16 | >16 | 32  | >8  | <=0.25 | >2    |       |
| <=1 | <=4 | 4   | <=1 | <=1 | <=0.25 | >2    |       |
| <=1 | <=4 | <=2 | <=1 | <=1 | <=0.25 | <=0.5 |       |
| <=1 | <=4 | <=2 | <=1 | >8  | <=0.25 | 1     |       |
| <=1 | <=4 | 4   | <=1 | <=1 | <=0.25 | <=0.5 |       |
| 2   | >16 | >16 | 32  | >8  | <=0.25 | >2    |       |
| <=1 | <=4 | 8   | <=1 | <=1 | <=0.25 | >2    |       |
| <=1 | <=4 | 4   | <=1 | <=1 | <=0.25 | <=0.5 |       |
| <=1 | <=4 | 4   | <=1 | <=1 | <=0.5  | <=4   | <=0.5 |
| <=1 | 16  | 16  | <=1 | <=1 | <=0.5  | <=4   | <=0.5 |
| <=1 | <=4 | <=2 | <=1 | <=1 | <=0.5  | >64   | <=0.5 |
| <=1 | <=4 | 4   | <=1 | <=1 | <=0.5  | <=4   | <=0.5 |
| <=1 | <=4 | <=2 | <=1 | <=1 | <=0.5  | <=4   | <=0.5 |
| >16 | >16 | >16 | >32 | >8  | <=0.5  | >64   | <=0.5 |
| >16 | >16 | >16 | >32 | 8   | <=0.25 | >2    |       |
| <=1 | <=4 | 4   | <=1 | <=1 | <=0.5  | >64   | >2    |
| <=1 | <=4 | 8   | <=1 | <=1 | <=0.5  | <=4   | >2    |
| <=1 | <=4 | 4   | <=1 | >8  | <=0.5  | 32    | >2    |
| >16 | <=4 | >16 | >32 | <=1 | <=0.25 | <=0.5 |       |
| <=1 | <=4 | 4   | <=1 | <=1 | <=0.5  | >64   | >2    |



|     |     |     |     |     |        |     |       |
|-----|-----|-----|-----|-----|--------|-----|-------|
| <=1 | 8   | 8   | <=1 | >8  | 1      | 32  | >4    |
| <=1 | <=4 | <=2 | <=1 | <=1 | <=0.5  | >64 | <=0.5 |
| <=1 | <=4 | 8   | <=1 | <=1 | <=0.5  | <=4 | <=0.5 |
| <=1 | <=4 | <=2 | <=1 | <=1 | <=0.5  | >64 | <=0.5 |
| <=1 | <=4 | 4   | <=1 | >8  | <=0.5  | >64 | >2    |
| <=1 | 8   | 4   | <=1 | <=1 | <=0.25 |     | >2    |
| <=1 | <=4 | 4   | <=1 | <=1 | <=0.25 |     | <=0.5 |
| <=1 | >16 | 16  | <=1 | <=1 | <=0.25 |     | <=0.5 |
| <=1 | 16  | 8   | <=1 | <=1 | <=0.25 |     | <=0.5 |
| <=1 | <=4 | 4   | <=1 | <=1 | <=0.25 |     | >2    |
| <=1 | >16 | 16  | <=1 | <=1 | <=0.25 |     | <=0.5 |
| <=1 | <=4 | 4   | <=1 | <=1 | <=0.25 |     | <=0.5 |
| >16 | 8   | >16 | >32 | >8  | <=0.25 |     | >2    |
| <=1 | <=4 | <=2 | <=1 | <=1 | <=0.25 |     | <=0.5 |
| <=1 | <=4 | 4   | <=1 | 4   | <=0.25 |     | >2    |
| <=1 | <=4 | 4   | <=1 | <=1 | <=0.5  | >64 | >2    |
| <=1 | >16 | >16 | 8   | >8  | <=0.25 |     | >2    |
| <=1 | <=4 | 4   | <=1 | <=1 | <=0.5  | <=4 | <=0.5 |
| 16  | >16 | >16 | >32 | >8  | <=0.5  | >64 | >4    |
| <=1 | <=4 | 4   | <=1 | <=1 | <=0.25 |     | <=0.5 |
| <=1 | <=4 | 4   | <=1 | <=1 | <=0.5  | >64 | >2    |
| <=1 | <=4 | 4   | <=1 | <=1 | <=0.5  | <=4 | <=0.5 |
| <=1 | <=4 | 4   | <=1 | >8  | <=0.25 |     | >2    |
| <=1 | >16 | >16 | 16  | >8  | <=0.25 |     | >2    |
| <=1 | <=4 | <=2 | <=1 | <=1 | <=0.25 |     | <=0.5 |
| <=1 | <=4 | 4   | <=1 | <=1 | <=0.25 |     | <=0.5 |
| <=1 | <=4 | <=2 | <=1 | <=1 | <=0.5  | 64  | >2    |
| <=1 | >16 | 16  | <=1 | >8  | <=0.5  | >64 | >2    |
| <=1 | <=4 | 4   | <=1 | <=1 | <=0.5  | <=4 | <=0.5 |
| <=1 | 8   | 8   | <=1 | <=1 | <=0.5  | <=4 | <=0.5 |
| <=1 | <=4 | 4   | <=1 | <=1 | <=0.5  | >64 | >2    |
| <=1 | <=4 | 8   | <=1 | <=1 | <=0.5  | >64 | <=0.5 |
| <=1 | <=4 | 4   | <=1 | <=1 | <=0.5  | <=4 | <=0.5 |
| <=1 | <=4 | 8   | <=1 | <=1 | <=0.5  | >64 | <=0.5 |
| <=1 | <=4 | 16  | <=1 | <=1 | <=0.5  | <=4 | >2    |
| <=1 | <=4 | 4   | <=1 | <=1 | <=0.5  | >64 | >2    |
| <=1 | <=4 | 8   | <=1 | 2   | <=0.25 |     | <=0.5 |
| <=1 | 16  | 8   | <=1 | >8  | <=0.25 |     | >2    |
| <=1 | <=4 | <=2 | <=1 | 2   | <=0.25 |     | <=0.5 |
| 8   | <=4 | >16 | >32 | <=1 | <=0.25 |     | <=0.5 |
| <=1 | >16 | 16  | <=1 | <=1 | 1      | <=4 | <=0.5 |
| 2   | >16 | >16 | >32 | <=1 | <=0.25 |     | <=0.5 |
| <=1 | <=4 | 4   | <=1 | >8  | <=0.25 |     | >2    |
| <=1 | <=4 | 4   | <=1 | <=1 | <=0.25 |     | <=0.5 |
| <=1 | <=4 | 4   | <=1 | <=1 | <=0.25 |     | <=0.5 |
| <=1 | >16 | >16 | <=1 | <=1 | <=0.25 |     | <=0.5 |
| >16 | 8   | >16 | >32 | <=1 | <=0.25 |     | <=0.5 |
| <=1 | <=4 | 4   | <=1 | <=1 | <=0.25 |     | >2    |
| <=1 | >16 | >16 | 8   | <=1 | <=0.25 |     | >2    |
| <=1 | <=4 | <=2 | <=1 | >8  | <=0.25 |     | >2    |
| <=1 | <=4 | 4   | <=1 | <=1 | <=0.5  | <=4 | <=0.5 |
| <=1 | >16 | >16 | >32 | 4   | 0.5    |     | <=0.5 |
| >16 | >16 | >16 | >32 | >8  | 0.5    |     | >2    |
| <=1 | 8   | 4   | <=1 | <=1 | <=0.25 |     | <=0.5 |
| <=1 | <=4 | 4   | <=1 | >8  | <=0.5  | >64 | >2    |
| <=1 | >16 | >16 | 8   | >8  | <=0.5  | 32  | <=0.5 |
| >16 | >16 | >16 | >32 | >8  | <=0.5  | >64 | >4    |
| >16 | >16 | >16 | >32 | >8  | 1      | >64 | >4    |
| <=1 | <=4 | 4   | <=1 | <=1 | <=0.25 |     | >2    |
| <=1 | <=4 | 4   | <=1 | <=1 | <=0.25 |     | >2    |
| <=1 | <=4 | 4   | <=1 | <=1 | <=0.25 |     | >2    |



|     |     |     |     |     |        |     |       |
|-----|-----|-----|-----|-----|--------|-----|-------|
| <=1 | <=4 | 8   | <=1 | <=1 | <=0.25 |     | <=0.5 |
| <=1 | <=4 | 4   | <=1 | <=1 | <=0.25 |     | >2    |
| <=1 | <=4 | 4   | <=1 | <=1 | <=0.25 |     | <=0.5 |
| <=1 | 8   | 8   | <=1 | <=1 | <=0.25 |     | >2    |
| <=1 | <=4 | 4   | <=1 | >8  | <=0.25 |     | >2    |
| <=1 | <=4 | 4   | <=1 | <=1 | <=0.25 |     | <=0.5 |
| <=1 | <=4 | 4   | <=1 | <=1 | <=0.25 |     | <=0.5 |
| <=1 | <=4 | 4   | <=1 | <=1 | <=0.25 |     | <=0.5 |
| <=1 | <=4 | <=2 | <=1 | <=1 | <=0.25 |     | >2    |
| <=1 | <=4 | 4   | <=1 | <=1 | <=0.25 |     | >2    |
| <=1 | <=4 | 4   | <=1 | <=1 | <=0.25 |     | <=0.5 |
| <=1 | 8   | 4   | <=1 | <=1 | <=0.25 |     | >2    |
| <=1 | 8   | 4   | <=1 | >8  | <=0.25 |     | >2    |
| <=1 | 8   | 8   | <=1 | 2   | <=0.25 |     | <=0.5 |
| <=1 | 8   | 8   | <=1 | <=1 | <=0.25 |     | <=0.5 |
| <=1 | <=4 | <=2 | <=1 | <=1 | <=0.25 |     | >2    |
| >16 | 16  | >16 | >32 | >8  | <=0.25 |     | >2    |
| <=1 | <=4 | 4   | <=1 | >8  | <=0.25 |     | <=0.5 |
| <=1 | <=4 | 4   | <=1 | <=1 | <=0.25 |     | >2    |
| <=1 | <=4 | 8   | <=1 | <=1 | <=0.5  | <=4 | <=0.5 |
| <=1 | <=4 | 4   | <=1 | <=1 | <=0.5  | >64 | >2    |
| <=1 | <=4 | 4   | <=1 | 8   | <=0.5  | >64 | >2    |
| <=1 | <=4 | 8   | <=1 | <=1 | <=0.5  | >64 | >2    |
| <=1 | 16  | 8   | <=1 | <=1 | <=0.5  | <=4 | <=0.5 |
| <=1 | <=4 | 4   | <=1 | <=1 | <=0.25 |     | <=0.5 |
| <=1 | <=4 | 4   | <=1 | <=1 | <=0.5  | <=4 | >2    |
| <=1 | <=4 | 4   | <=1 | >8  | <=0.25 |     | <=0.5 |
| <=1 | 8   | 4   | <=1 | <=1 | <=0.25 |     | <=0.5 |
| <=1 | <=4 | 4   | <=1 | <=1 | <=0.25 |     | >2    |
| <=1 | <=4 | 4   | <=1 | <=1 | <=0.25 |     | <=0.5 |
| <=1 | <=4 | 8   | <=1 | 2   | <=0.25 |     | <=0.5 |
| <=1 | >16 | >16 | 16  | >8  | <=0.25 |     | >2    |
| <=1 | 16  | 8   | <=1 | 4   | <=0.25 |     | >2    |
| <=1 | >16 | >16 | 32  | <=1 | <=0.25 |     | >2    |
| <=1 | 16  | 8   | <=1 | <=1 | <=0.25 |     | >2    |
| <=1 | <=4 | 4   | <=1 | <=1 | <=0.25 |     | >2    |
| <=1 | 16  | 16  | <=1 | <=1 | <=0.25 |     | >2    |
| <=1 | <=4 | <=2 | <=1 | <=1 | <=0.25 |     | <=0.5 |
| <=1 | <=4 | <=2 | <=1 | <=1 | <=0.25 |     | >2    |
| <=1 | <=4 | 16  | <=1 | 2   | 0.5    |     | <=0.5 |
| <=1 | <=4 | 4   | <=1 | >8  | <=0.25 |     | >2    |
| <=1 | 8   | 4   | <=1 | >8  | <=0.25 |     | >2    |
| <=1 | 8   | 4   | <=1 | >8  | <=0.25 |     | >2    |
| <=1 | <=4 | 4   | <=1 | >8  | <=0.25 |     | <=0.5 |
| <=1 | <=4 | 4   | <=1 | <=1 | <=0.25 |     | <=0.5 |
| <=1 | <=4 | 4   | <=1 | >8  | <=0.25 |     | >2    |
| <=1 | <=4 | 4   | <=1 | <=1 | <=0.5  | >64 | >2    |
| >16 | 16  | >16 | >32 | <=1 | <=0.25 |     | <=0.5 |
| <=1 | >16 | >16 | 32  | >8  | <=0.25 |     | >2    |
| <=1 | >16 | >16 | 8   | >8  | <=0.25 |     | >2    |
| <=1 | <=4 | 4   | <=1 | 4   | <=0.25 |     | <=0.5 |
| <=1 | <=4 | <=2 | <=1 | 2   | <=0.25 |     | <=0.5 |
| <=1 | <=4 | <=2 | <=1 | <=1 | <=0.5  | <=4 | <=0.5 |
| <=1 | <=4 | <=2 | <=1 | >8  | <=0.5  | <=4 | <=0.5 |
| <=1 | >16 | >16 | 32  | <=1 | <=0.5  | >64 | >4    |
| <=1 | >16 | >16 | 8   | >8  | <=0.5  | >64 | >4    |
| <=1 | <=4 | 4   | <=1 | <=1 | <=0.25 |     | >2    |
| <=1 | <=4 | 4   | <=1 | <=1 | <=0.25 |     | >2    |
| <=1 | <=4 | 4   | <=1 | <=1 | <=0.25 |     | <=0.5 |
| <=1 | <=4 | 8   | <=1 | <=1 | <=0.5  | <=4 | <=0.5 |
| <=1 | >16 | 16  | 8   | 2   | <=0.5  | >64 | >4    |

|     |     |     |     |     |        |     |       |
|-----|-----|-----|-----|-----|--------|-----|-------|
| <=1 | <=4 | 16  | <=1 | <=1 | <=0.5  | >64 | <=0.5 |
| <=1 | <=4 | 8   | <=1 | 2   | <=0.5  | >64 | <=0.5 |
| <=1 | <=4 | 4   | <=1 | <=1 | <=0.25 |     | <=0.5 |
| <=1 | <=4 | <=2 | <=1 | <=1 | <=0.5  | <=4 | <=0.5 |
| <=1 | <=4 | 4   | <=1 | <=1 | <=0.5  | <=4 | <=0.5 |
| <=1 | <=4 | 4   | <=1 | <=1 | <=0.5  | <=4 | >2    |
| <=1 | <=4 | 4   | <=1 | <=1 | <=0.5  | <=4 | <=0.5 |
| <=1 | <=4 | <=2 | <=1 | <=1 | <=0.5  | >64 | <=0.5 |
| <=1 | <=4 | 4   | <=1 | <=1 | <=0.5  | >64 | >2    |
| <=1 | <=4 | 4   | <=1 | <=1 | <=0.5  | >64 | <=0.5 |
| <=1 | 8   | 4   | <=1 | >8  | <=0.5  | >64 | >2    |
| <=1 | <=4 | 4   | <=1 | <=1 | <=0.5  | >64 | <=0.5 |
| <=1 | >16 | >16 | 16  | <=1 | <=0.5  | 64  | <=0.5 |
| <=1 | >16 | >16 | 32  | >8  | <=0.5  | >64 | >4    |
| <=1 | <=4 | 4   | <=1 | <=1 | <=0.5  | <=4 | <=0.5 |
| <=1 | <=4 | 8   | <=1 | <=1 | <=0.5  | >64 | <=0.5 |
| <=1 | <=4 | <=2 | <=1 | <=1 | <=0.5  | <=4 | <=0.5 |
| <=1 | <=4 | <=2 | <=1 | <=1 | <=0.5  | <=4 | <=0.5 |
| <=1 | >16 | >16 | 16  | 2   | <=0.25 |     | >2    |
| <=1 | <=4 | 4   | <=1 | <=1 | <=0.25 |     | <=0.5 |
| <=1 | <=4 | 4   | <=1 | <=1 | <=0.25 |     | <=0.5 |
| <=1 | <=4 | <=2 | <=1 | <=1 | <=0.25 |     | <=0.5 |
| <=1 | <=4 | 4   | <=1 | <=1 | <=0.25 |     | <=0.5 |
| <=1 | <=4 | <=2 | <=1 | <=1 | <=0.25 |     | <=0.5 |
| 16  | >16 | >16 | >32 | >8  | <=0.25 |     | <=0.5 |
| <=1 | 8   | 4   | <=1 | <=1 | <=0.25 |     | <=0.5 |
| <=1 | <=4 | 4   | <=1 | <=1 | <=0.25 |     | <=0.5 |
| <=1 | <=4 | 8   | <=1 | <=1 | 1      | >64 | <=0.5 |
| <=1 | 16  | 8   | <=1 | >8  | <=0.25 |     | >2    |
| <=1 | <=4 | 4   | <=1 | <=1 | <=0.5  | >64 | <=0.5 |
| <=1 | <=4 | 8   | <=1 | <=1 | <=0.5  | >64 | >4    |
| <=1 | 8   | 4   | <=1 | <=1 | <=0.25 |     | 1     |
| <=1 | 8   | 4   | <=1 | 2   | <=0.5  | >64 | >2    |
| <=1 | <=4 | 16  | <=1 | 2   | <=0.5  | <=4 | <=0.5 |
| >16 | 8   | >16 | >32 | >8  | <=0.5  | >64 | <=0.5 |
| <=1 | >16 | >16 | 8   | <=1 | <=0.5  | 32  | <=0.5 |
| <=1 | >16 | 16  | <=1 | >8  | <=0.5  | >64 | >2    |
| <=1 | <=4 | 4   | <=1 | 4   | <=0.5  | >64 | <=0.5 |
| <=1 | <=4 | 4   | <=1 | <=1 | <=0.25 |     | <=0.5 |
| <=1 | <=4 | 4   | <=1 | >8  | <=0.25 |     | >2    |
| <=1 | 16  | 16  | <=1 | <=1 | <=0.25 |     | >2    |
| <=1 | >16 | >16 | 16  | >8  | <=0.25 |     | >2    |
| >16 | 16  | >16 | >32 | >8  | <=0.25 |     | >2    |
| <=1 | <=4 | 4   | <=1 | <=1 | <=0.25 |     | <=0.5 |
| 8   | >16 | >16 | >32 | >8  | <=0.25 |     | <=0.5 |
| <=1 | <=4 | 8   | <=1 | >8  | <=0.25 |     | >2    |
| <=1 | <=4 | 4   | <=1 | 2   | <=0.25 |     | >2    |
| <=1 | <=4 | 4   | <=1 | <=1 | <=0.25 |     | >2    |
| <=1 | >16 | >16 | 16  | <=1 | <=0.25 |     | <=0.5 |
| <=1 | 16  | >16 | 32  | <=1 | <=0.25 |     | >2    |
| <=1 | <=4 | <=2 | <=1 | <=1 | <=0.25 |     | <=0.5 |
| <=1 | >16 | 8   | 2   | >8  | <=0.25 |     | 1     |
| <=1 | <=4 | 4   | <=1 | <=1 | <=0.25 |     | <=0.5 |
| <=1 | 8   | 4   | <=1 | <=1 | <=0.25 |     | >2    |
| <=1 | <=4 | 4   | <=1 | <=1 | <=0.25 |     | <=0.5 |
| <=1 | 8   | 4   | <=1 | <=1 | <=0.25 |     | <=0.5 |
| <=1 | <=4 | 4   | <=1 | <=1 | <=0.25 |     | >2    |
| <=1 | 8   | 4   | <=1 | <=1 | <=0.25 |     | <=0.5 |
| >16 | <=4 | >16 | >32 | <=1 | <=0.25 |     | >2    |
| >16 | >16 | >16 | >32 | >8  | <=0.25 |     | >2    |
| <=1 | >16 | >16 | 8   | >8  | <=0.25 |     | >2    |

|     |     |     |     |     |        |     |       |
|-----|-----|-----|-----|-----|--------|-----|-------|
| <=1 | >16 | >16 | 8   | <=1 | <=0.25 |     | <=0.5 |
| <=1 | <=4 | 4   | <=1 | <=1 | <=0.25 |     | <=0.5 |
| <=1 | 8   | 8   | <=1 | <=1 | <=0.25 |     | <=0.5 |
| <=1 | 16  | 16  | <=1 | >8  | <=0.25 |     | >2    |
| <=1 | <=4 | 4   | <=1 | <=1 | <=0.25 |     | >2    |
| <=1 | <=4 | 4   | <=1 | <=1 | <=0.25 |     | <=0.5 |
| <=1 | <=4 | 4   | <=1 | <=1 | <=0.25 |     | >2    |
| <=1 | 8   | 4   | <=1 | <=1 | <=0.25 |     | <=0.5 |
| <=1 | <=4 | 4   | <=1 | <=1 | <=0.25 |     | <=0.5 |
| <=1 | 8   | 8   | <=1 | <=1 | <=0.25 |     | <=0.5 |
| 2   | 8   | >16 | 32  | <=1 | <=0.25 |     | <=0.5 |
| <=1 | <=4 | 4   | <=1 | <=1 | <=0.25 |     | <=0.5 |
| <=1 | 8   | 8   | <=1 | >8  | <=0.25 |     | >2    |
| <=1 | <=4 | 4   | <=1 | >8  | <=0.25 |     | >2    |
| >16 | <=4 | >16 | >32 | >8  | <=0.5  | >64 | >4    |
| <=1 | <=4 | 4   | <=1 | <=1 | <=0.25 |     | <=0.5 |
| <=1 | <=4 | 4   | <=1 | <=1 | <=0.5  | >64 | <=0.5 |
| <=1 | <=4 | 4   | <=1 | <=1 | <=0.5  | <=4 | <=0.5 |
| <=1 | <=4 | 4   | <=1 | <=1 | <=0.5  | <=4 | >2    |
| >16 | >16 | >16 | >32 | >8  | <=0.5  | >64 | >4    |
| <=1 | <=4 | 4   | <=1 | <=1 | <=0.5  | <=4 | >2    |
| <=1 | 8   | 4   | <=1 | <=1 | <=0.25 |     | >2    |
| <=1 | >16 | >16 | 8   | <=1 | <=0.5  | >64 | >4    |
| <=1 | 8   | 8   | <=1 | >8  | <=0.25 |     | >2    |
| <=1 | <=4 | 8   | <=1 | <=1 | <=0.5  | >64 | >2    |
| <=1 | 8   | 4   | <=1 | <=1 | <=0.25 |     | <=0.5 |
| <=1 | <=4 | <=2 | <=1 | <=1 | <=0.25 |     | <=0.5 |
| <=1 | 16  | 8   | <=1 | <=1 | <=0.25 |     | >2    |
| <=1 | <=4 | 8   | <=1 | <=1 | <=0.5  | >64 | <=0.5 |
| <=1 | <=4 | 4   | <=1 | <=1 | <=0.5  | <=4 | <=0.5 |
| <=1 | <=4 | 4   | <=1 | <=1 | <=0.25 |     | >2    |
| <=1 | <=4 | <=2 | <=1 | >8  | <=0.25 |     | >2    |
| <=1 | <=4 | 4   | <=1 | >8  | <=0.25 |     | >2    |
| <=1 | <=4 | 4   | <=1 | >8  | <=0.25 |     | >2    |
| >16 | 8   | >16 | >32 | >8  | <=0.25 |     | >2    |
| 8   | 8   | >16 | >32 | >8  | <=0.25 |     | <=0.5 |
| <=1 | <=4 | 4   | <=1 | >8  | <=0.25 |     | >2    |
| <=1 | <=4 | 4   | <=1 | <=1 | <=0.5  | <=4 | <=0.5 |
| <=1 | <=4 | 8   | <=1 | >8  | <=0.5  | >64 | <=0.5 |
| <=1 | <=4 | 4   | <=1 | <=1 | <=0.5  | >64 | >2    |
| <=1 | <=4 | 8   | <=1 | <=1 | <=0.5  | >64 | <=0.5 |
| <=1 | <=4 | 4   | <=1 | <=1 | <=0.5  | <=4 | <=0.5 |
| <=1 | <=4 | 8   | <=1 | <=1 | <=0.5  | >64 | >2    |
| <=1 | <=4 | 4   | <=1 | <=1 | <=0.5  | <=4 | <=0.5 |
| <=1 | <=4 | 4   | <=1 | <=1 | <=0.5  | >64 | <=0.5 |
| <=1 | <=4 | 4   | <=1 | <=1 | <=0.5  | >64 | <=0.5 |
| <=1 | <=4 | 4   | <=1 | <=1 | <=0.5  | >64 | <=0.5 |
| <=1 | <=4 | 4   | <=1 | <=1 | <=0.25 |     | <=0.5 |
| <=1 | <=4 | 8   | <=1 | 8   | <=0.5  | >64 | >2    |
| <=1 | <=4 | 4   | <=1 | <=1 | <=0.5  | <=4 | <=0.5 |
| >16 | 16  | >16 | >32 | 2   | <=0.5  | >64 | >4    |
| <=1 | >16 | >16 | 8   | <=1 | <=0.5  | 64  | <=0.5 |
| <=1 | <=4 | 8   | <=1 | <=1 | <=0.5  | <=4 | <=0.5 |
| <=1 | >16 | >16 | 16  | <=1 | <=0.5  | >64 | <=0.5 |
| <=1 | <=4 | 4   | <=1 | <=1 | <=0.5  | <=4 | <=0.5 |
| <=1 | <=4 | <=2 | <=1 | <=1 | <=0.5  | <=4 | <=0.5 |
| <=1 | <=4 | <=2 | <=1 | 2   | <=0.25 |     | 1     |
| <=1 | <=4 | 8   | <=1 | <=1 | <=0.25 |     | <=0.5 |
| <=1 | <=4 | 8   | <=1 | >8  | <=0.25 |     | <=0.5 |
| <=1 | <=4 | 4   | <=1 | <=1 | <=0.25 |     | <=0.5 |
| <=1 | <=4 | 4   | <=1 | <=1 | <=0.25 |     | <=0.5 |

|     |     |     |     |     |        |     |       |
|-----|-----|-----|-----|-----|--------|-----|-------|
| <=1 | <=4 | <=2 | <=1 | <=1 | <=0.25 |     | <=0.5 |
| <=1 | <=4 | 4   | <=1 | >8  | <=0.25 |     | >2    |
| <=1 | 8   | 4   | <=1 | <=1 | <=0.25 |     | <=0.5 |
| <=1 | 8   | 8   | <=1 | <=1 | <=0.25 |     | <=0.5 |
| <=1 | 8   | 8   | <=1 | >8  | <=0.25 |     | >2    |
| <=1 | 8   | 4   | <=1 | <=1 | <=0.25 |     | <=0.5 |
| <=1 | <=4 | <=2 | <=1 | <=1 | <=0.25 |     | <=0.5 |
| <=1 | 8   | 4   | <=1 | 8   | <=0.25 |     | >2    |
| <=1 | <=4 | 4   | <=1 | <=1 | <=0.25 |     | <=0.5 |
| <=1 | >16 | >16 | 8   | >8  | <=0.25 |     | >2    |
| <=1 | <=4 | 4   | <=1 | 8   | <=0.25 |     | >2    |
| <=1 | <=4 | <=2 | <=1 | <=1 | <=0.25 |     | <=0.5 |
| <=1 | <=4 | 4   | <=1 | <=1 | <=0.5  | >64 | <=0.5 |
| <=1 | <=4 | 4   | <=1 | <=1 | <=0.5  | >64 | <=0.5 |
| <=1 | >16 | >16 | >32 | >8  | <=0.5  | >64 | >4    |
| <=1 | <=4 | 4   | <=1 | <=1 | <=0.5  | >64 | >2    |
| <=1 | <=4 | 4   | <=1 | <=1 | <=0.5  | >64 | <=0.5 |
| >16 | >16 | >16 | >32 | >8  | <=0.5  | >64 | >4    |
| 4   | 8   | >16 | >32 | 2   | <=0.5  | >64 | >4    |
| <=1 | <=4 | 4   | <=1 | >8  | <=0.25 |     | >2    |
| <=1 | 8   | 4   | <=1 | <=1 | <=0.25 |     | <=0.5 |
| <=1 | <=4 | 8   | <=1 | <=1 | <=0.25 |     | >2    |
| <=1 | >16 | >16 | >32 | <=1 | 0.5    |     | <=0.5 |
| <=1 | 8   | 4   | <=1 | 2   | <=0.25 |     | >2    |
| <=1 | >16 | >16 | 8   | <=1 | <=0.25 |     | <=0.5 |
| <=1 | <=4 | <=2 | <=1 | <=1 | <=0.25 |     | >2    |
| <=1 | <=4 | 4   | <=1 | <=1 | <=0.25 |     | <=0.5 |
| <=1 | <=4 | 4   | <=1 | <=1 | <=0.25 |     | <=0.5 |
| <=1 | <=4 | 4   | <=1 | <=1 | <=0.25 |     | <=0.5 |
| >16 | >16 | >16 | >32 | >8  | <=0.25 |     | >2    |
| >16 | >16 | >16 | >32 | >8  | <=0.25 |     | >2    |
| <=1 | 16  | 4   | <=1 | <=1 | <=0.25 |     | <=0.5 |
| <=1 | <=4 | 4   | <=1 | <=1 | <=0.25 |     | >2    |
| <=1 | <=4 | <=2 | <=1 | <=1 | <=0.25 |     | <=0.5 |
| <=1 | <=4 | <=2 | <=1 | <=1 | <=0.25 |     | <=0.5 |
| <=1 | 8   | 8   | <=1 | 2   | <=0.25 |     | >2    |
| <=1 | <=4 | <=2 | <=1 | <=1 | <=0.25 |     | <=0.5 |
| <=1 | <=4 | <=2 | <=1 | <=1 | <=0.25 |     | <=0.5 |
| <=1 | <=4 | <=2 | <=1 | <=1 | <=0.25 |     | <=0.5 |
| <=1 | <=4 | <=2 | <=1 | <=1 | <=0.25 |     | >2    |
| <=1 | <=4 | 4   | <=1 | <=1 | <=0.25 |     | <=0.5 |
| <=1 | <=4 | 4   | <=1 | <=1 | <=0.25 |     | <=0.5 |
| <=1 | <=4 | 4   | <=1 | <=1 | <=0.25 |     | <=0.5 |
| <=1 | <=4 | 8   | <=1 | <=1 | <=0.25 |     | <=0.5 |
| <=1 | <=4 | 4   | <=1 | <=1 | <=0.25 |     | <=0.5 |
| <=1 | <=4 | 4   | <=1 | <=1 | <=0.25 |     | <=0.5 |
| <=1 | 16  | 8   | <=1 | <=1 | <=0.25 |     | >2    |
| <=1 | <=4 | <=2 | <=1 | >8  | <=0.25 |     | <=0.5 |
| <=1 | <=4 | 8   | <=1 | >8  | <=0.25 |     | >2    |
| <=1 | <=4 | <=2 | <=1 | 8   | <=0.25 |     | >2    |
| <=1 | <=4 | 4   | <=1 | <=1 | <=0.25 |     | <=0.5 |
| <=1 | <=4 | <=2 | <=1 | <=1 | <=0.25 |     | <=0.5 |
| <=1 | <=4 | 4   | <=1 | <=1 | <=0.25 |     | <=0.5 |
| <=1 | <=4 | 4   | <=1 | <=1 | <=0.25 |     | <=0.5 |
| <=1 | <=4 | 8   | <=1 | <=1 | <=0.25 |     | <=0.5 |
| <=1 | <=4 | 4   | <=1 | 8   | <=0.25 |     | >2    |
| <=1 | <=4 | <=2 | <=1 | <=1 | <=0.25 |     | >2    |
| <=1 | >16 | >16 | <=1 | <=1 | <=0.25 |     | <=0.5 |
| <=1 | <=4 | 4   | <=1 | <=1 | <=0.25 |     | >2    |
| >16 | >16 | >16 | >32 | 2   | <=0.5  | >64 | >4    |

|     |     |     |     |     |        |     |       |
|-----|-----|-----|-----|-----|--------|-----|-------|
| <=1 | <=4 | 4   | <=1 | <=1 | <=0.25 |     | <=0.5 |
| <=1 | 8   | 4   | <=1 | <=1 | <=0.25 |     | >2    |
| <=1 | 8   | 4   | <=1 | <=1 | <=0.25 |     | <=0.5 |
| <=1 | <=4 | 4   | <=1 | <=1 | <=0.25 |     | <=0.5 |
| <=1 | <=4 | 4   | <=1 | <=1 | <=0.25 |     | >2    |
| <=1 | <=4 | 16  | <=1 | <=1 | <=0.25 |     | <=0.5 |
| <=1 | 8   | 4   | <=1 | <=1 | <=0.25 |     | >2    |
| <=1 | <=4 | 8   | <=1 | 2   | <=0.5  | <=4 | <=0.5 |
| <=1 | <=4 | 4   | <=1 | <=1 | <=0.5  | 64  | >2    |
| <=1 | <=4 | 4   | <=1 | >8  | <=0.5  | >64 | >2    |
| <=1 | <=4 | 8   | <=1 | 4   | <=0.5  | >64 | >2    |
| <=1 | <=4 | <=2 | <=1 | >8  | <=0.5  | 64  | <=0.5 |
| <=1 | >16 | 16  | 2   | <=1 | <=0.5  | >64 | >4    |
| <=1 | <=4 | 4   | <=1 | <=1 | <=0.25 |     | >2    |
| <=1 | <=4 | 4   | <=1 | <=1 | <=0.25 |     | >2    |
| <=1 | <=4 | 8   | <=1 | <=1 | <=0.25 |     | <=0.5 |
| <=1 | <=4 | 16  | <=1 | <=1 | <=0.25 |     | <=0.5 |
| <=1 | <=4 | 4   | <=1 | >8  | <=0.25 |     | >2    |
| <=1 | <=4 | 4   | <=1 | <=1 | <=0.25 |     | <=0.5 |
| <=1 | <=4 | 8   | <=1 | <=1 | <=0.5  | <=4 | <=0.5 |
| <=1 | <=4 | 4   | <=1 | 4   | <=0.25 |     | >2    |
| <=1 | 16  | 16  | <=1 | >8  | <=0.25 |     | >2    |
| <=1 | 8   | 4   | <=1 | >8  | <=0.25 |     | >2    |
| <=1 | 16  | 8   | <=1 | <=1 | <=0.25 |     | <=0.5 |
| <=1 | 8   | 4   | <=1 | >8  | <=0.25 |     | >2    |
| <=1 | <=4 | 8   | <=1 | <=1 | <=0.5  | >64 | <=0.5 |
| <=1 | <=4 | 4   | <=1 | <=1 | <=0.25 |     | <=0.5 |
| <=1 | >16 | 16  | 4   | <=1 | <=0.25 |     | <=0.5 |
| <=1 | <=4 | 8   | <=1 | <=1 | <=0.25 |     | >2    |
| >16 | 8   | >16 | >32 | >8  | <=0.25 |     | <=0.5 |
| <=1 | <=4 | 4   | <=1 | <=1 | <=0.25 |     | <=0.5 |
| <=1 | <=4 | >16 | 8   | <=1 | <=0.25 |     | <=0.5 |
| <=1 | <=4 | 4   | <=1 | <=1 | <=0.5  | <=4 | <=0.5 |
| <=1 | <=4 | 16  | 32  | >8  | <=0.5  | >64 | >2    |
| <=1 | <=4 | 4   | <=1 | <=1 | <=0.5  | >64 | >2    |
| <=1 | <=4 | 16  | <=1 | <=1 | <=0.5  | >64 | >2    |
| <=1 | <=4 | 8   | <=1 | <=1 | <=0.5  | >64 | <=0.5 |
| <=1 | <=4 | 4   | <=1 | <=1 | <=0.5  | >64 | <=0.5 |
| <=1 | <=4 | 4   | <=1 | <=1 | <=0.5  | >64 | >2    |
| <=1 | <=4 | <=2 | <=1 | <=1 | <=0.5  | >64 | >2    |
| 8   | >16 | >16 | 32  | >8  | 1      | >64 | >4    |
| <=1 | <=4 | 4   | <=1 | <=1 | <=0.5  | >64 | >2    |
| <=1 | >16 | >16 | 16  | >8  | <=0.5  | >64 | >4    |
| <=1 | <=4 | <=2 | <=1 | <=1 | <=0.5  | <=4 | <=0.5 |
| <=1 | <=4 | 4   | <=1 | <=1 | <=0.5  | >64 | >2    |
| <=1 | >16 | 16  | 4   | <=1 | <=0.5  | >64 | <=0.5 |
| <=1 | <=4 | <=2 | <=1 | <=1 | 1      | >64 | <=0.5 |
| <=1 | >16 | >16 | 8   | <=1 | <=0.25 |     | >2    |
| <=1 | <=4 | <=2 | <=1 | <=1 | <=0.25 |     | <=0.5 |
| <=1 | <=4 | 4   | <=1 | <=1 | <=0.25 |     | <=0.5 |
| <=1 | <=4 | <=2 | <=1 | <=1 | <=0.25 |     | <=0.5 |
| <=1 | <=4 | 8   | <=1 | <=1 | <=0.5  | <=4 | <=0.5 |
| <=1 | <=4 | 8   | <=1 | >8  | <=0.5  | >64 | >2    |
| <=1 | <=4 | 4   | <=1 | <=1 | <=0.5  | <=4 | <=0.5 |
| <=1 | <=4 | 4   | <=1 | <=1 | <=0.5  | >64 | <=0.5 |
| <=1 | <=4 | 4   | <=1 | 8   | <=0.5  | 8   | <=0.5 |
| <=1 | <=4 | 4   | <=1 | <=1 | <=0.5  | <=4 | <=0.5 |
| <=1 | <=4 | 8   | <=1 | <=1 | <=0.5  | <=4 | <=0.5 |
| <=1 | 8   | 4   | <=1 | 2   | <=0.5  | >64 | >2    |
| <=1 | <=4 | 4   | <=1 | <=1 | <=0.5  | >64 | >2    |
| <=1 | <=4 | 4   | <=1 | <=1 | <=0.5  | <=4 | <=0.5 |

|     |     |     |     |     |        |     |       |
|-----|-----|-----|-----|-----|--------|-----|-------|
| <=1 | <=4 | 4   | <=1 | <=1 | <=0.25 |     | >2    |
| <=1 | <=4 | 8   | <=1 | <=1 | <=0.5  | >64 | <=0.5 |
| <=1 | <=4 | 4   | <=1 | <=1 | <=0.5  | <=4 | <=0.5 |
| <=1 | <=4 | 4   | <=1 | <=1 | <=0.5  | 64  | >2    |
| <=1 | <=4 | 4   | <=1 | <=1 | <=0.5  | >64 | >2    |
| <=1 | <=4 | 8   | <=1 | <=1 | <=0.5  | >64 | >2    |
| <=1 | 8   | 16  | <=1 | <=1 | <=0.5  | <=4 | <=0.5 |
| <=1 | <=4 | <=2 | <=1 | <=1 | <=0.5  | <=4 | <=0.5 |
| <=1 | <=4 | 4   | <=1 | <=1 | <=0.5  | >64 | >4    |
| <=1 | <=4 | <=2 | <=1 | <=1 | <=0.5  | <=4 | <=0.5 |
| <=1 | 8   | 16  | <=1 | >8  | <=0.5  | >64 | <=0.5 |
| <=1 | <=4 | 4   | <=1 | >8  | <=0.25 |     | >2    |
| <=1 | 16  | 8   | <=1 | >8  | <=0.25 |     | >2    |
| <=1 | <=4 | 4   | <=1 | <=1 | <=0.25 |     | 1     |
| <=1 | <=4 | <=2 | <=1 | <=1 | <=0.25 |     | <=0.5 |
| <=1 | <=4 | 4   | <=1 | 2   | <=0.25 |     | <=0.5 |
| <=1 | <=4 | 4   | <=1 | <=1 | <=0.25 |     | >2    |
| <=1 | <=4 | <=2 | <=1 | <=1 | <=0.25 |     | >2    |
| <=1 | <=4 | 4   | <=1 | <=1 | <=0.5  | <=4 | <=0.5 |
| <=1 | <=4 | 4   | <=1 | <=1 | <=0.5  | >64 | <=0.5 |
| <=1 | <=4 | <=2 | <=1 | <=1 | <=0.5  | <=4 | <=0.5 |
| <=1 | 8   | 8   | <=1 | >8  | <=0.25 |     | >2    |
| <=1 | <=4 | 4   | <=1 | >8  | <=0.25 |     | >2    |
| <=1 | <=4 | 4   | <=1 | 2   | <=0.25 |     | <=0.5 |
| <=1 | <=4 | 4   | 2   | <=1 | <=0.25 |     | <=0.5 |
| <=1 | <=4 | 4   | <=1 | >8  | <=0.25 |     | >2    |
| >16 | >16 | >16 | >32 | >8  | 0.5    |     | >2    |
| <=1 | <=4 | 4   | <=1 | <=1 | <=0.25 |     | >2    |
| <=1 | <=4 | 4   | <=1 | <=1 | <=0.25 |     | <=0.5 |
| <=1 | <=4 | 4   | <=1 | 2   | <=0.25 |     | <=0.5 |
| <=1 | <=4 | <=2 | <=1 | <=1 | <=0.5  | <=4 | <=0.5 |
| <=1 | <=4 | 4   | <=1 | >8  | <=0.5  | >64 | >2    |
| <=1 | <=4 | 4   | <=1 | <=1 | <=0.5  | <=4 | <=0.5 |
| <=1 | <=4 | 4   | <=1 | <=1 | <=0.5  | >64 | <=0.5 |
| <=1 | <=4 | 8   | <=1 | <=1 | <=0.5  | >64 | >2    |
| <=1 | 8   | 4   | <=1 | <=1 | <=0.5  | <=4 | <=0.5 |
| <=1 | <=4 | 4   | <=1 | <=1 | <=0.25 |     | <=0.5 |
| <=1 | <=4 | 4   | <=1 | <=1 | <=0.25 |     | >2    |
| <=1 | <=4 | 4   | <=1 | <=1 | <=0.25 |     | <=0.5 |
| <=1 | 8   | 8   | <=1 | <=1 | <=0.25 |     | <=0.5 |
| <=1 | 8   | 4   | <=1 | >8  | <=0.5  | >64 | >2    |
| 8   | <=4 | >16 | >32 | <=1 | <=0.25 |     | <=0.5 |
| <=1 | <=4 | 4   | <=1 | <=1 | <=0.5  | <=4 | <=0.5 |
| >16 | >16 | >16 | >32 | >8  | <=0.25 |     | >2    |
| <=1 | <=4 | <=2 | <=1 | <=1 | <=0.5  | >64 | >2    |
| 16  | >16 | >16 | >32 | >8  | <=0.5  | >64 | >4    |
| <=1 | <=4 | 4   | <=1 | >8  | <=0.25 |     | >2    |
| <=1 | <=4 | 4   | <=1 | <=1 | <=0.25 |     | <=0.5 |
| <=1 | <=4 | 4   | <=1 | <=1 | <=0.25 |     | >2    |
| 16  | >16 | >16 | >32 | >8  | 0.5    |     | >2    |
| <=1 | <=4 | 4   | <=1 | <=1 | <=0.25 |     | >2    |
| <=1 | <=4 | 4   | <=1 | <=1 | <=0.25 |     | 2     |
| <=1 | <=4 | 4   | <=1 | <=1 | <=0.25 |     | <=0.5 |
| <=1 | <=4 | 4   | <=1 | <=1 | <=0.25 |     | <=0.5 |
| <=1 | <=4 | <=2 | <=1 | <=1 | <=0.25 |     | <=0.5 |
| <=1 | 8   | 4   | <=1 | <=1 | <=0.25 |     | <=0.5 |
| <=1 | <=4 | 4   | <=1 | >8  | <=0.25 |     | >2    |
| <=1 | <=4 | 4   | <=1 | <=1 | <=0.25 |     | >2    |
| <=1 | <=4 | 8   | <=1 | <=1 | <=0.5  | <=4 | <=0.5 |
| <=1 | >16 | >16 | 16  | >8  | <=0.5  | >64 | >4    |
| <=1 | <=4 | 4   | <=1 | <=1 | <=0.5  | >64 | <=0.5 |

|        |     |     |     |     |     |      |        |        |       |
|--------|-----|-----|-----|-----|-----|------|--------|--------|-------|
|        | <=1 |     | <=4 | 4   | <=1 | 2    | <=0.5  | <=4    | <=0.5 |
|        | <=1 |     | <=4 | 8   | <=1 | <=1  | <=0.5  | >64    | >2    |
|        | >16 |     | 8   | >16 | >32 | >8   | <=0.5  | >64    | >4    |
|        | <=1 |     | <=4 | <=2 | <=1 | >8   | <=0.5  | <=4    | <=0.5 |
|        | <=1 |     | <=4 | 4   | <=1 | <=1  | <=0.5  | >64    | >2    |
|        | <=1 |     | <=4 | 4   | <=1 | <=1  | <=0.5  | <=4    | <=0.5 |
|        | <=1 |     | >16 | >16 | 32  | <=1  | <=0.5  | >64    | <=0.5 |
|        | 2   |     | <=4 | 8   | <=1 | >8   | <=0.5  | >64    | >2    |
|        | <=1 |     | <=4 | 4   | <=1 | <=1  | <=0.5  | >64    | <=0.5 |
|        | <=1 |     | <=4 | 4   | <=1 | <=1  | <=0.5  | >64    | <=0.5 |
|        | <=1 |     | <=4 | 8   | <=1 | <=1  | 1      | <=4    | >2    |
|        | <=1 |     | <=4 | 4   | <=1 | <=1  | <=0.5  | <=4    | <=0.5 |
|        | <=1 |     | <=4 | 8   | <=1 | <=1  | <=0.5  | <=4    | <=0.5 |
|        | <=1 |     | 8   | 8   | <=1 | 2    | <=0.5  | <=4    | <=0.5 |
|        | <=1 |     | <=4 | 4   | <=1 | <=1  | <=0.5  | >64    | <=0.5 |
|        | <=1 |     | <=4 | 4   | <=1 | <=1  | <=0.5  | >64    | >2    |
|        | <=1 |     | <=4 | 8   | <=1 | <=1  | <=0.25 |        | <=0.5 |
|        | <=1 |     | 8   | 8   | <=1 | <=1  | <=0.5  | >64    | <=0.5 |
|        | <=1 |     | <=4 | 4   | <=1 | <=1  | <=0.5  | >64    | >2    |
|        | <=1 |     | <=4 | 8   | <=1 | <=1  | <=0.5  | <=4    | <=0.5 |
| <=0.25 | 16  | 0.5 | 8   | >16 | >32 | 16   | >8     | <=0.25 | <=0.5 |
| <=0.25 | >16 | 1   | 16  | >16 | >32 | 32   | >8     | <=0.25 | >2    |
| <=0.25 | >16 | 1   | <=4 | >16 | >32 | 32   | 2      | <=0.25 | >2    |
| <=0.25 | <=1 | 0.5 | 8   | 8   | <=1 | 32   | 2      | <=0.25 | >2    |
| <=0.25 | <=1 | 1   | <=4 | 4   | <=1 | 32   | <=1    | <=0.25 | <=0.5 |
| <=0.25 | <=1 | 0.5 | <=4 | 4   | <=1 | 16   | >8     | <=0.25 | <=0.5 |
| <=0.25 | <=1 | 1   | <=4 | <=2 | <=1 | 32   | <=1    | <=0.25 | <=0.5 |
| <=0.25 | <=1 | 2   | <=4 | 4   | <=1 | 32   | <=1    | <=0.25 | <=0.5 |
| <=0.25 | <=1 | 0.5 | <=4 | 4   | <=1 | 32   | <=1    | <=0.25 | <=0.5 |
| <=0.25 | <=1 | 2   | <=4 | 4   | <=1 | 32   | <=1    | <=0.25 | >2    |
| <=0.25 | <=1 | 0.5 | <=4 | <=2 | <=1 | 32   | <=1    | <=0.25 | <=0.5 |
| <=0.25 | <=1 | 1   | <=4 | 4   | <=1 | 32   | <=1    | <=0.25 | <=0.5 |
| 0.5    | <=1 | 1   | >16 | >16 | 32  | 32   | <=1    | <=0.25 | >2    |
| <=0.25 | <=1 | 1   | <=4 | 4   | <=1 | 32   | <=1    | <=0.25 | >2    |
| <=0.25 | <=1 | 0.5 | <=4 | <=2 | <=1 | 32   | <=1    | <=0.25 | <=0.5 |
| <=0.25 | <=1 | 1   | <=4 | 4   | <=1 | 32   | >8     | <=0.25 | <=0.5 |
| <=0.25 | <=1 | 0.5 | <=4 | <=2 | <=1 | 32   | <=1    | <=0.25 | >2    |
| <=0.25 | <=1 | 1   | <=4 | 8   | <=1 | 32   | <=1    | <=0.25 | <=0.5 |
| 0.5    | 2   | 0.5 | >16 | >16 | >32 | 16   | <=1    | <=0.25 | <=0.5 |
| <=0.25 | <=1 | 0.5 | <=4 | 4   | <=1 | 32   | <=1    | <=0.25 | <=0.5 |
| <=0.25 | 8   | 0.5 | <=4 | >16 | >32 | 16   | >8     | <=0.25 | <=0.5 |
| <=0.25 | <=1 | 1   | <=4 | <=2 | <=1 | 32   | <=1    | <=0.25 | <=0.5 |
| <=0.25 | <=1 | 4   | <=4 | 8   | <=1 | 32   | <=1    | <=0.25 | <=0.5 |
| <=0.25 | <=1 | 0.5 | <=4 | 8   | <=1 | 32   | <=1    | <=0.25 | >2    |
| <=0.25 | <=1 | 0.5 | <=4 | 8   | <=1 | 16   | <=1    | <=0.25 | >2    |
| <=0.25 | <=1 | 1   | <=4 | <=2 | <=1 | 8    | 2      | <=0.25 | >2    |
| 0.5    | >16 | 1   | <=4 | >16 | >32 | 32   | <=1    | <=0.25 | <=0.5 |
| <=0.25 | 8   | 1   | <=4 | >16 | >32 | 16   | >8     | <=0.25 | <=0.5 |
| <=0.25 | 16  | 1   | 8   | >16 | >32 | 16   | >8     | <=0.25 | <=0.5 |
| <=0.25 | <=1 |     | <=4 | 8   | <=1 |      | >8     | <=0.25 | >2    |
| <=0.25 | <=1 |     | <=4 | 4   | <=1 |      | <=1    | <=0.25 | <=0.5 |
| <=0.25 | <=1 |     | 16  | 8   | <=1 |      | <=1    | <=0.25 | <=0.5 |
| <=0.25 | <=1 |     | <=4 | 4   | <=1 |      | <=1    | <=0.25 | <=0.5 |
| <=0.25 | <=1 |     | <=4 | 8   | <=1 |      | <=1    | <=0.25 | >2    |
| <=0.25 | <=1 |     | >16 | >16 | 16  |      | >8     | <=0.25 | >2    |
| <=0.25 | <=1 |     | >16 | >16 | <=1 |      | <=1    | <=0.25 | <=0.5 |
| 1      | 2   | 4   | >16 | >16 | 32  | >256 | >8     | <=0.25 | >2    |
| <=0.25 | >16 | 2   | 8   | >16 | >32 | 16   | >8     | <=0.25 | >2    |
| <=0.25 | 8   | 0.5 | <=4 | >16 | >32 | 32   | <=1    | <=0.25 | >2    |
| <=0.25 | >16 |     | 8   | >16 | >32 |      | <=1    | <=0.25 | >2    |

|        |     |        |     |     |     |     |     |        |       |
|--------|-----|--------|-----|-----|-----|-----|-----|--------|-------|
| <=0.25 | 16  | 1      | <=4 | >16 | >32 | 32  | >8  | <=0.25 | >2    |
| <=0.25 | 4   | 2      | 8   | >16 | >32 | 64  | <=1 | <=0.25 | >2    |
| <=0.25 | >16 | 2      | 8   | >16 | >32 | 16  | <=1 | <=0.25 | >2    |
| <=0.25 | 16  | 1      | 8   | >16 | >32 | 64  | >8  | <=0.25 | <=0.5 |
| <=0.25 | >16 | 0.5    | 8   | >16 | >32 | 32  | <=1 | <=0.25 | <=0.5 |
| 0.5    | 4   | <=0.25 | >16 | >16 | >32 | 32  | <=1 | 0.5    | <=0.5 |
| <=0.25 | 8   | 0.5    | >16 | >16 | >32 | 64  | >8  | <=0.25 | >2    |
| <=0.25 | 16  | 0.5    | 8   | >16 | >32 | 64  | <=1 | <=0.25 | <=0.5 |
| <=0.25 | 4   | 0.5    | <=4 | >16 | 32  | 32  | >8  | <=0.25 | >2    |
| <=0.25 | >16 | 1      | 16  | >16 | >32 | 32  | >8  | <=0.25 | >2    |
| 0.5    | >16 | 1      | >16 | >16 | >32 | 16  | >8  | 0.5    | >2    |
| <=0.25 | >16 |        | 8   | >16 | >32 |     | >8  | <=0.25 | >2    |
| <=0.25 | <=1 | 1      | <=4 | >16 | 16  | 32  | <=1 | <=0.25 | >2    |
| <=0.25 | >16 | 0.5    | 16  | >16 | >32 | 32  | <=1 | <=0.25 | <=0.5 |
| <=0.25 | >16 | 1      | <=4 | >16 | >32 | 32  | >8  | <=0.25 | >2    |
| <=0.25 | >16 | 0.5    | >16 | >16 | >32 | 16  | >8  | <=0.25 | <=0.5 |
| <=0.25 | >16 | 1      | <=4 | >16 | >32 | 16  | >8  | <=0.25 | <=0.5 |
| <=0.25 | >16 | 1      | 8   | >16 | >32 | 32  | >8  | <=0.25 | >2    |
| <=0.25 | >16 | 4      | 8   | >16 | >32 | 32  | <=1 | <=0.25 | >2    |
| <=0.25 | >16 | 0.5    | <=4 | >16 | >32 | 32  | >8  | <=0.25 | >2    |
| <=0.25 | 8   |        | <=4 | >16 | >32 |     | <=1 | <=0.25 | >2    |
| <=0.25 | <=1 |        | <=4 | 4   | <=1 |     | <=1 | <=0.25 | <=0.5 |
| <=0.25 | <=1 | 1      | >16 | >16 | 8   | 32  | <=1 | <=0.25 | <=0.5 |
| <=0.25 | <=1 | 1      | <=4 | 4   | <=1 | 32  | <=1 | <=0.25 | >2    |
| <=0.25 | <=1 | 1      | <=4 | 4   | <=1 | 32  | >8  | <=0.25 | >2    |
| <=0.25 | <=1 | 1      | <=4 | 4   | <=1 | 32  | >8  | <=0.25 | >2    |
| <=0.25 | 2   | 4      | >16 | >16 | >32 | 32  | >8  | <=0.25 | >2    |
| <=0.25 | <=1 | 1      | <=4 | 8   | <=1 | 32  | >8  | <=0.25 | <=0.5 |
| <=0.25 | <=1 | <=0.25 | 8   | 8   | <=1 | 32  | <=1 | <=0.25 | >2    |
| <=0.25 | <=1 | 2      | <=4 | 8   | <=1 | 32  | <=1 | <=0.25 | <=0.5 |
| <=0.25 | <=1 | 0.5    | <=4 | 8   | <=1 | 32  | <=1 | <=0.25 | <=0.5 |
| <=0.25 | <=1 | 1      | 8   | 8   | <=1 | 128 | >8  | <=0.25 | >2    |
| <=0.25 | <=1 | 2      | <=4 | 8   | <=1 | 32  | <=1 | <=0.25 | <=0.5 |
| <=0.25 | <=1 | 4      | <=4 | 4   | <=1 | 32  | <=1 | <=0.25 | >2    |
| <=0.25 | <=1 | 0.5    | <=4 | 4   | <=1 | 32  | <=1 | <=0.25 | <=0.5 |
| <=0.25 | <=1 | 1      | <=4 | <=2 | <=1 | 16  | 2   | <=0.25 | <=0.5 |
| <=0.25 | <=1 |        | <=4 | 4   | <=1 |     | <=1 | <=0.25 | <=0.5 |
| <=0.25 | >16 | 2      | 8   | >16 | >32 | 32  | >8  | <=0.25 | >2    |
| <=0.25 | >16 | 128    | 16  | >16 | >32 | 32  | >8  | <=0.25 | <=0.5 |
| <=0.25 | <=1 | 1      | 8   | 4   | <=1 | 16  | 2   | <=0.25 | <=0.5 |
| <=0.25 | <=1 | 1      | 8   | 8   | <=1 | 32  | <=1 | <=0.25 | >2    |
| <=0.25 | <=1 |        | <=4 | 4   | <=1 |     | <=1 | <=0.25 | <=0.5 |
| <=0.25 | <=1 |        | <=4 | 4   | <=1 |     | <=1 | <=0.25 | <=0.5 |
| <=0.25 | <=1 |        | <=4 | 4   | <=1 |     | <=1 | <=0.25 | <=0.5 |
| <=0.25 | <=1 | 0.5    | 8   | 8   | <=1 | 16  | <=1 | <=0.25 | >2    |
| <=0.25 | <=1 | 0.5    | <=4 | 8   | <=1 | 32  | <=1 | <=0.25 | >2    |
| <=0.25 | <=1 |        | <=4 | 8   | <=1 |     | >8  | <=0.25 | >2    |
| <=0.25 | <=1 | 2      | <=4 | 8   | <=1 | 32  | <=1 | <=0.25 | >2    |
| <=0.25 | 2   | 1      | >16 | >16 | >32 | 16  | <=1 | 1      | >2    |
| <=0.25 | <=1 | 1      | 8   | 4   | <=1 | 32  | <=1 | <=0.25 | <=0.5 |
| <=0.25 | <=1 |        | <=4 | 4   | <=1 |     | <=1 | <=0.25 | >2    |
| <=0.25 | <=1 | 0.5    | <=4 | 4   | <=1 | 32  | <=1 | <=0.25 | <=0.5 |
| <=0.25 | <=1 | 2      | <=4 | 4   | <=1 | 32  | <=1 | <=0.25 | 1     |
| <=0.25 | <=1 | 1      | 8   | 8   | <=1 | 32  | <=1 | <=0.25 | <=0.5 |
| <=0.25 | <=1 | 1      | <=4 | 4   | <=1 | 16  | <=1 | <=0.25 | >2    |
| <=0.25 | <=1 | 1      | <=4 | 4   | <=1 | 32  | >8  | <=0.25 | <=0.5 |
| <=0.25 | <=1 |        | <=4 | 4   | <=1 |     | <=1 | <=0.25 | >2    |
| <=0.25 | <=1 |        | <=4 | 4   | <=1 |     | <=1 | <=0.25 | <=0.5 |
| <=0.25 | >16 |        | >16 | >16 | >32 |     | <=1 | <=0.25 | >2    |
| <=0.25 | <=1 | 0.5    | 16  | 8   | <=1 | 32  | <=1 | <=0.25 | >2    |
| <=0.25 | <=1 | 0.5    | <=4 | 4   | <=1 | 32  | <=1 | <=0.25 | <=0.5 |
| <=0.25 | <=1 | 1      | <=4 | 4   | <=1 | 32  | <=1 | <=0.25 | >2    |



|        |     |     |     |     |     |     |     |        |       |
|--------|-----|-----|-----|-----|-----|-----|-----|--------|-------|
| <=0.25 | <=1 | 0.5 | <=4 | 4   | <=1 | 32  | >8  | <=0.25 | <=0.5 |
| <=0.25 | <=1 |     | 8   | 8   | <=1 |     | <=1 | <=0.25 | >2    |
| <=0.25 | <=1 |     | <=4 | 4   | <=1 |     | <=1 | <=0.25 | >2    |
| <=0.25 | <=1 |     | 8   | 4   | <=1 |     | <=1 | <=0.25 | <=0.5 |
| <=0.25 | <=1 |     | <=4 | 4   | <=1 |     | <=1 | <=0.25 | <=0.5 |
| 1      | 4   |     | >16 | >16 | >32 |     | <=1 | 1      | <=0.5 |
| <=0.25 | <=1 |     | <=4 | 4   | <=1 |     | <=1 | <=0.25 | <=0.5 |
| <=0.25 | <=1 |     | <=4 | 4   | <=1 |     | <=1 | <=0.25 | >2    |
| <=0.25 | <=1 |     | <=4 | <=2 | <=1 |     | <=1 | <=0.25 | <=0.5 |
| <=0.25 | <=1 |     | <=4 | <=2 | <=1 |     | <=1 | <=0.25 | >2    |
| <=0.25 | <=1 |     | <=4 | 4   | <=1 |     | <=1 | <=0.25 | >2    |
| <=0.25 | <=1 | 1   | 8   | 16  | <=1 | 256 | <=1 | <=0.25 | >2    |
| <=0.25 | <=1 | 0.5 | <=4 | 4   | <=1 | 64  | <=1 | <=0.25 | <=0.5 |
| <=0.25 | <=1 | 2   | >16 | >16 | 16  | 32  | <=1 | <=0.25 | >2    |
| <=0.25 | <=1 | 0.5 | >16 | >16 | 16  | 16  | >8  | <=0.25 | 1     |
| <=0.25 | <=1 | 0.5 | <=4 | 8   | <=1 | 16  | <=1 | <=0.25 | >2    |
| <=0.25 | <=1 |     | 8   | 8   | <=1 |     | <=1 | <=0.25 | <=0.5 |
| <=0.25 | <=1 |     | <=4 | 4   | <=1 |     | <=1 | <=0.25 | >2    |
| <=0.25 | <=1 |     | <=4 | 8   | <=1 |     | <=1 | <=0.25 | >2    |
| <=0.25 | >16 |     | 8   | >16 | >32 |     | >8  | <=0.25 | >2    |
| <=0.25 | <=1 |     | 16  | 16  | <=1 |     | >8  | <=0.25 | >2    |
| <=0.25 | <=1 |     | <=4 | 4   | <=1 |     | <=1 | <=0.25 | <=0.5 |
| <=0.25 | <=1 |     | >16 | >16 | 16  |     | >8  | <=0.25 | >2    |
| <=0.25 | <=1 | 0.5 | <=4 | 8   | <=1 | 32  | <=1 | <=0.25 | <=0.5 |
| <=0.25 | <=1 | 2   | <=4 | 4   | <=1 | 16  | <=1 | <=0.25 | >2    |
| <=0.25 | <=1 | 4   | >16 | >16 | 8   | 256 | >8  | <=0.25 | >2    |
| <=0.25 | <=1 | 2   | 16  | 16  | <=1 | 32  | >8  | <=0.25 | <=0.5 |
| <=0.25 | <=1 | 1   | 8   | 8   | <=1 | 32  | <=1 | <=0.25 | <=0.5 |
| <=0.25 | <=1 | 1   | >16 | >16 | 8   | 128 | >8  | <=0.25 | >2    |
| <=0.25 | <=1 | 1   | <=4 | 8   | <=1 | 32  | <=1 | <=0.25 | <=0.5 |
| <=0.25 | <=1 | 0.5 | <=4 | 4   | <=1 | 32  | >8  | <=0.25 | >2    |
| <=0.25 | <=1 |     | <=4 | 8   | <=1 |     | >8  | <=0.25 | >2    |
| <=0.25 | >16 | 1   | 8   | >16 | >32 | 16  | >8  | <=0.25 | <=0.5 |
| <=0.25 | 2   | 0.5 | 8   | >16 | >32 | 16  | <=1 | <=0.25 | >2    |
| <=0.25 | <=1 |     | 8   | 8   | <=1 |     | <=1 | 0.5    | >2    |
| <=0.25 | >16 |     | <=4 | >16 | >32 |     | >8  | <=0.25 | >2    |
| <=0.25 | <=1 |     | <=4 | 4   | <=1 |     | <=1 | <=0.25 | >2    |
| <=0.25 | <=1 |     | <=4 | 8   | <=1 |     | >8  | <=0.25 | <=0.5 |
| <=0.25 | <=1 |     | 8   | 4   | <=1 |     | <=1 | <=0.25 | <=0.5 |
| <=0.25 | >16 |     | 16  | >16 | >32 |     | >8  | <=0.25 | 1     |
| <=0.25 | <=1 |     | 8   | 8   | <=1 |     | <=1 | <=0.25 | >2    |
| <=0.25 | <=1 |     | 8   | 4   | <=1 |     | <=1 | <=0.25 | <=0.5 |
| <=0.25 | <=1 |     | <=4 | <=2 | <=1 |     | <=1 | <=0.25 | <=0.5 |
| <=0.25 | <=1 |     | 16  | 16  | 2   |     | <=1 | <=0.25 | >2    |
| <=0.25 | <=1 |     | 16  | 16  | <=1 |     | >8  | <=0.25 | >2    |
| <=0.25 | <=1 |     | <=4 | 8   | <=1 |     | <=1 | <=0.25 | >2    |
| <=0.25 | <=1 | 0.5 | <=4 | 4   | <=1 | 32  | >8  | <=0.25 | >2    |
| <=0.25 | <=1 | 1   | <=4 | 8   | <=1 | 16  | <=1 | <=0.25 | >2    |
| <=0.25 | >16 | 1   | 8   | >16 | >32 | 16  | >8  | <=0.25 | <=0.5 |
| <=0.25 | >16 | 0.5 | >16 | >16 | >32 | 128 | >8  | <=0.25 | >2    |
| <=0.25 | <=1 | 2   | <=4 | 4   | <=1 | 32  | <=1 | <=0.25 | >2    |
| <=0.25 | <=1 | 128 | 16  | 16  | <=1 | 64  | <=1 | <=0.25 | <=0.5 |
| <=0.25 | <=1 | 0.5 | <=4 | 4   | <=1 | 32  | >8  | <=0.25 | <=0.5 |
| <=0.25 | <=1 | 2   | >16 | >16 | 16  | 32  | >8  | <=0.25 | <=0.5 |
| <=0.25 | <=1 | 0.5 | <=4 | <=2 | <=1 | 32  | 2   | <=0.25 | <=0.5 |
| <=0.25 | <=1 | 1   | <=4 | <=2 | <=1 | 64  | <=1 | <=0.25 | <=0.5 |
| <=0.25 | <=1 | 0.5 | <=4 | 4   | <=1 | 32  | 2   | <=0.25 | <=0.5 |
| <=0.25 | <=1 | 1   | 8   | 8   | <=1 | 64  | <=1 | <=0.25 | <=0.5 |
| <=0.25 | <=1 | 0.5 | >16 | >16 | <=1 | 8   | <=1 | <=0.25 | >2    |
| <=0.25 | <=1 | 1   | <=4 | 4   | <=1 | 16  | <=1 | <=0.25 | <=0.5 |
| <=0.25 | <=1 | 0.5 | <=4 | <=2 | <=1 | 32  | <=1 | <=0.25 | <=0.5 |

|        |     |     |     |     |     |    |     |        |       |
|--------|-----|-----|-----|-----|-----|----|-----|--------|-------|
| <=0.25 | <=1 | 64  | <=4 | 4   | <=1 | 32 | 2   | <=0.25 | <=0.5 |
| <=0.25 | <=1 | 0.5 | 8   | 8   | <=1 | 16 | <=1 | <=0.25 | >2    |
| <=0.25 | <=1 | 0.5 | 8   | 8   | <=1 | 32 | 2   | <=0.25 | <=0.5 |
| <=0.25 | >16 | 2   | <=4 | >16 | >32 | 16 | <=1 | <=0.25 | >2    |
| <=0.25 | <=1 | 0.5 | <=4 | 4   | <=1 | 32 | <=1 | <=0.25 | <=0.5 |
| <=0.25 | <=1 |     | <=4 | 4   | <=1 |    | >8  | <=0.25 | >2    |
| <=0.25 | <=1 | 0.5 | <=4 | 4   | <=1 | 32 | <=1 | <=0.25 | <=0.5 |
| <=0.25 | <=1 |     | <=4 | 4   | <=1 |    | <=1 | <=0.25 | >2    |
| <=0.25 | 4   |     | <=4 | >16 | 32  |    | <=1 | <=0.25 | >2    |
| <=0.25 | <=1 |     | <=4 | <=2 | <=1 |    | <=1 | <=0.25 | <=0.5 |
| <=0.25 | <=1 |     | <=4 | 4   | <=1 |    | <=1 | <=0.25 | <=0.5 |
| <=0.25 | <=1 |     | <=4 | 8   | <=1 |    | <=1 | <=0.25 | >2    |
| <=0.25 | <=1 |     | <=4 | 4   | <=1 |    | <=1 | <=0.25 | <=0.5 |
| <=0.25 | <=1 |     | <=4 | 4   | <=1 |    | <=1 | <=0.25 | >2    |
| <=0.25 | <=1 |     | 16  | 8   | <=1 |    | <=1 | <=0.25 | <=0.5 |
| <=0.25 | <=1 |     | <=4 | 4   | <=1 |    | 2   | <=0.25 | >2    |
| <=0.25 | <=1 |     | <=4 | 8   | <=1 |    | >8  | <=0.25 | <=0.5 |
| <=0.25 | <=1 |     | <=4 | <=2 | <=1 |    | <=1 | <=0.25 | <=0.5 |
| <=0.25 | <=1 | 2   | <=4 | 4   | <=1 | 32 | <=1 | <=0.25 | <=0.5 |
| <=0.25 | <=1 | 0.5 | >16 | >16 | 8   | 16 | <=1 | <=0.25 | <=0.5 |
| <=0.25 | <=1 | 1   | >16 | >16 | 32  | 32 | >8  | <=0.25 | <=0.5 |
| <=0.25 | <=1 |     | <=4 | 8   | <=1 |    | <=1 | <=0.25 | <=0.5 |
| <=0.25 | <=1 | 0.5 | <=4 | <=2 | <=1 | 32 | <=1 | <=0.25 | >2    |
| <=0.25 | <=1 | 0.5 | <=4 | 4   | <=1 | 32 | <=1 | <=0.25 | <=0.5 |
| <=0.25 | <=1 |     | <=4 | 8   | <=1 |    | <=1 | <=0.25 | 1     |
| <=0.25 | <=1 | 1   | 8   | 8   | <=1 | 32 | 4   | <=0.25 | >2    |
| <=0.25 | <=1 | 32  | 16  | 8   | <=1 | 8  | 2   | <=0.25 | >2    |
| <=0.25 | <=1 |     | <=4 | 4   | <=1 |    | <=1 | <=0.25 | >2    |
| <=0.25 | <=1 |     | 8   | 4   | <=1 |    | <=1 | <=0.25 | <=0.5 |
| <=0.25 | <=1 |     | <=4 | 4   | <=1 |    | <=1 | <=0.25 | <=0.5 |
| <=0.25 | <=1 |     | <=4 | 4   | <=1 |    | <=1 | <=0.25 | <=0.5 |
| <=0.25 | <=1 |     | 8   | 8   | <=1 |    | <=1 | <=0.25 | >2    |
| <=0.25 | 8   |     | 16  | >16 | >32 |    | <=1 | <=0.25 | >2    |
| <=0.25 | <=1 |     | <=4 | 4   | <=1 |    | <=1 | <=0.25 | <=0.5 |
| <=0.25 | <=1 |     | <=4 | 8   | <=1 |    | <=1 | <=0.25 | <=0.5 |
| <=0.25 | <=1 |     | <=4 | 8   | <=1 |    | <=1 | <=0.25 | <=0.5 |
| <=0.25 | <=1 |     | <=4 | <=2 | <=1 |    | <=1 | <=0.25 | <=0.5 |
| <=0.25 | <=1 |     | >16 | >16 | 8   |    | <=1 | <=0.25 | <=0.5 |
| <=0.25 | <=1 | 1   | <=4 | 8   | <=1 | 16 | <=1 | <=0.25 | <=0.5 |
| <=0.25 | <=1 | 1   | <=4 | 4   | <=1 | 32 | <=1 | <=0.25 | >2    |
| <=0.25 | <=1 | 1   | <=4 | <=2 | <=1 | 32 | >8  | <=0.25 | >2    |
| <=0.25 | <=1 | 1   | <=4 | 4   | <=1 | 16 | <=1 | <=0.25 | <=0.5 |
| <=0.25 | <=1 | 0.5 | <=4 | 4   | <=1 | 32 | <=1 | <=0.25 | <=0.5 |
| <=0.25 | <=1 | 1   | <=4 | 4   | <=1 | 16 | <=1 | <=0.25 | >2    |
| <=0.25 | <=1 | 0.5 | 8   | 4   | <=1 | 32 | <=1 | <=0.25 | <=0.5 |
| <=0.25 | <=1 | 0.5 | <=4 | <=2 | <=1 | 32 | <=1 | <=0.25 | <=0.5 |
| <=0.25 | <=1 | 1   | <=4 | 8   | <=1 | 32 | >8  | <=0.25 | <=0.5 |
| <=0.25 | <=1 | 2   | <=4 | 4   | <=1 | 32 | <=1 | <=0.25 | <=0.5 |
| <=0.25 | <=1 | 2   | <=4 | 8   | 8   | 32 | <=1 | <=0.25 | <=0.5 |
| <=0.25 | <=1 | 0.5 | <=4 | 4   | <=1 | 32 | <=1 | <=0.25 | <=0.5 |
| <=0.25 | <=1 | 2   | <=4 | 4   | <=1 | 32 | <=1 | <=0.25 | <=0.5 |
| <=0.25 | <=1 | 0.5 | <=4 | <=2 | <=1 | 32 | <=1 | <=0.25 | <=0.5 |
| <=0.25 | <=1 | 0.5 | 8   | 8   | <=1 | 32 | <=1 | <=0.25 | <=0.5 |
| <=0.25 | <=1 | 1   | <=4 | 8   | <=1 | 16 | <=1 | <=0.25 | >2    |
| <=0.25 | <=1 | 0.5 | <=4 | 4   | <=1 | 32 | <=1 | <=0.25 | <=0.5 |
| <=0.25 | <=1 | 0.5 | <=4 | 4   | <=1 | 32 | <=1 | <=0.25 | <=0.5 |
| <=0.25 | <=1 | 2   | <=4 | 4   | <=1 | 32 | <=1 | <=0.25 | <=0.5 |
| <=0.25 | <=1 | 0.5 | 8   | 8   | <=1 | 32 | 4   | <=0.25 | >2    |
| <=0.25 | <=1 | 1   | <=4 | 4   | <=1 | 32 | 2   | <=0.25 | >2    |
| <=0.25 | <=1 | 2   | <=4 | <=2 | <=1 | 16 | <=1 | <=0.25 | <=0.5 |
| <=0.25 | <=1 |     | 16  | 8   | <=1 |    | <=1 | <=0.25 | <=0.5 |

|        |     |        |     |     |     |     |     |        |       |
|--------|-----|--------|-----|-----|-----|-----|-----|--------|-------|
| <=0.25 | <=1 | 0.5    | <=4 | 8   | <=1 | 32  | <=1 | <=0.25 | <=0.5 |
| <=0.25 | <=1 | 2      | <=4 | 8   | <=1 | 32  | <=1 | <=0.25 | <=0.5 |
| <=0.25 | <=1 | 1      | <=4 | 4   | <=1 | 32  | <=1 | <=0.25 | >2    |
| <=0.25 | <=1 |        | <=4 | <=2 | <=1 |     | <=1 | <=0.25 | <=0.5 |
| <=0.25 | <=1 |        | <=4 | 4   | <=1 |     | <=1 | <=0.25 | >2    |
| <=0.25 | <=1 |        | <=4 | <=2 | <=1 |     | 2   | <=0.25 | <=0.5 |
| <=0.25 | <=1 |        | <=4 | 4   | <=1 |     | 2   | <=0.25 | <=0.5 |
| <=0.25 | <=1 |        | <=4 | 4   | <=1 |     | >8  | <=0.25 | >2    |
| 0.5    | <=1 | 2      | <=4 | 4   | <=1 | 32  | >8  | <=0.25 | >2    |
| <=0.25 | <=1 | 32     | 8   | 8   | <=1 | 32  | <=1 | <=0.25 | <=0.5 |
| <=0.25 | 8   |        | <=4 | >16 | >32 |     | <=1 | <=0.25 | <=0.5 |
| <=0.25 | <=1 | 1      | <=4 | 8   | <=1 | 32  | <=1 | <=0.25 | >2    |
| <=0.25 | <=1 | 0.5    | <=4 | 4   | <=1 | 32  | <=1 | <=0.25 | <=0.5 |
| <=0.25 | <=1 | 1      | <=4 | 8   | <=1 | 32  | <=1 | <=0.25 | <=0.5 |
| <=0.25 | <=1 | 2      | <=4 | 8   | <=1 | 16  | 2   | <=0.25 | >2    |
| <=0.25 | <=1 | 0.5    | 8   | 8   | <=1 | 32  | >8  | <=0.25 | <=0.5 |
| <=0.25 | <=1 | 0.5    | <=4 | 8   | <=1 | 32  | <=1 | <=0.25 | <=0.5 |
| <=0.25 | <=1 | 1      | <=4 | 4   | <=1 | 32  | <=1 | <=0.25 | >2    |
| <=0.25 | <=1 | 0.5    | <=4 | 4   | <=1 | 32  | <=1 | <=0.25 | <=0.5 |
| <=0.25 | >16 | 1      | <=4 | >16 | >32 | 16  | >8  | <=0.25 | <=0.5 |
| <=0.25 | <=1 | 0.5    | <=4 | 4   | <=1 | 32  | <=1 | <=0.25 | <=0.5 |
| <=0.25 | <=1 | 1      | >16 | >16 | 8   | 16  | <=1 | <=0.25 | <=0.5 |
| <=0.25 | <=1 | 1      | 8   | 8   | <=1 | 32  | <=1 | <=0.25 | <=0.5 |
| <=0.25 | <=1 | 1      | <=4 | <=2 | <=1 | 32  | <=1 | <=0.25 | <=0.5 |
| <=0.25 | <=1 | 1      | 8   | 8   | <=1 | 32  | <=1 | <=0.25 | >2    |
| <=0.25 | <=1 | 0.5    | <=4 | 4   | <=1 | 16  | <=1 | <=0.25 | >2    |
| <=0.25 | <=1 | 1      | >16 | >16 | 8   | 128 | <=1 | 1      | >2    |
| <=0.25 | <=1 | 1      | <=4 | 8   | <=1 | 32  | <=1 | <=0.25 | <=0.5 |
| <=0.25 | <=1 | 256    | <=4 | 4   | <=1 | 32  | <=1 | <=0.25 | <=0.5 |
| <=0.25 | <=1 | 2      | <=4 | 4   | <=1 | 32  | <=1 | <=0.25 | <=0.5 |
| <=0.25 | <=1 | 1      | 8   | <=2 | <=1 | 32  | <=1 | <=0.25 | >2    |
| <=0.25 | <=1 | 1      | <=4 | 4   | <=1 | 16  | <=1 | <=0.25 | >2    |
| 0.5    | >16 | 2      | 16  | >16 | >32 | 32  | >8  | <=0.25 | <=0.5 |
| <=0.25 | <=1 | 0.5    | <=4 | 4   | <=1 | 32  | <=1 | <=0.25 | <=0.5 |
| <=0.25 | <=1 | 1      | <=4 | <=2 | <=1 | 32  | <=1 | <=0.25 | <=0.5 |
| <=0.25 | <=1 |        | >16 | >16 | 32  |     | <=1 | <=0.25 | <=0.5 |
| <=0.25 | <=1 |        | <=4 | 8   | <=1 |     | <=1 | <=0.25 | <=0.5 |
| <=0.25 | <=1 |        | <=4 | 4   | <=1 |     | >8  | <=0.25 | <=0.5 |
| <=0.25 | <=1 |        | 8   | 8   | <=1 |     | 2   | <=0.25 | <=0.5 |
| <=0.25 | <=1 |        | <=4 | 4   | <=1 |     | <=1 | <=0.25 | >2    |
| <=0.25 | 2   |        | <=4 | >16 | 32  |     | <=1 | <=0.25 | >2    |
| <=0.25 | <=1 |        | <=4 | 4   | <=1 |     | >8  | <=0.25 | >2    |
| <=0.25 | >16 |        | >16 | >16 | >32 |     | >8  | <=0.25 | >2    |
| <=0.25 | <=1 |        | <=4 | 8   | <=1 |     | <=1 | <=0.25 | <=0.5 |
| <=0.25 | <=1 |        | 16  | 8   | <=1 |     | <=1 | <=0.25 | <=0.5 |
| <=0.25 | >16 | 0.5    | 8   | >16 | >32 | 16  | <=1 | <=0.25 | <=0.5 |
| <=0.25 | <=1 | 1      | <=4 | <=2 | <=1 | 32  | <=1 | <=0.25 | <=0.5 |
| <=0.25 | <=1 | 0.5    | <=4 | 8   | <=1 | 32  | >8  | <=0.25 | <=0.5 |
| <=0.25 | <=1 | 1      | <=4 | 8   | <=1 | 32  | <=1 | <=0.25 | >2    |
| <=0.25 | <=1 | 0.5    | <=4 | 8   | <=1 | 32  | <=1 | <=0.25 | >2    |
| <=0.25 | <=1 |        | <=4 | 4   | <=1 |     | <=1 | <=0.25 | >2    |
| <=0.25 | <=1 |        | <=4 | 4   | 8   |     | <=1 | <=0.25 | <=0.5 |
| <=0.25 | <=1 | 1      | <=4 | 8   | <=1 | 32  | <=1 | <=0.25 | <=0.5 |
| <=0.25 | <=1 | <=0.25 | <=4 | 4   | <=1 | 32  | <=1 | <=0.25 | >2    |
| <=0.25 | <=1 | 1      | <=4 | 4   | <=1 | 32  | <=1 | <=0.25 | <=0.5 |
| <=0.25 | <=1 | 2      | >16 | >16 | 8   | 64  | 2   | 0.5    | <=0.5 |
| <=0.25 | <=1 |        | <=4 | 4   | <=1 |     | <=1 | <=0.25 | <=0.5 |
| <=0.25 | <=1 | 0.5    | <=4 | <=2 | <=1 | 32  | <=1 | <=0.25 | <=0.5 |
| <=0.25 | <=1 |        | <=4 | 4   | <=1 |     | <=1 | <=0.25 | <=0.5 |
| <=0.25 | <=1 |        | >16 | >16 | 8   |     | >8  | <=0.25 | >2    |
| <=0.25 | <=1 | 1      | <=4 | 4   | <=1 | 32  | <=1 | <=0.25 | <=0.5 |

|        |     |        |     |     |     |     |     |        |       |
|--------|-----|--------|-----|-----|-----|-----|-----|--------|-------|
| 2      | 8   | 0.5    | >16 | >16 | >32 | 32  | >8  | 0.5    | >2    |
| <=0.25 | 8   | 0.5    | <=4 | >16 | >32 | 16  | >8  | <=0.25 | >2    |
| <=0.25 | <=1 |        | <=4 | 8   | <=1 |     | <=1 | <=0.25 | <=0.5 |
| <=0.25 | <=1 | 0.5    | >16 | 16  | 4   | 32  | <=1 | <=0.25 | >2    |
| <=0.25 | <=1 | 1      | <=4 | 4   | <=1 | 32  | <=1 | <=0.25 | <=0.5 |
| <=0.25 | <=1 | 0.5    | <=4 | 8   | <=1 | 32  | <=1 | <=0.25 | <=0.5 |
| <=0.25 | <=1 | 8      | <=4 | 8   | <=1 | 128 | <=1 | <=0.25 | >2    |
| <=0.25 | <=1 | 0.5    | <=4 | 8   | <=1 | 32  | <=1 | <=0.25 | >2    |
| <=0.25 | <=1 | <=0.25 | <=4 | 4   | <=1 | 32  | <=1 | <=0.25 | >2    |
| <=0.25 | <=1 | 2      | <=4 | 4   | <=1 | 32  | <=1 | <=0.25 | <=0.5 |
| <=0.25 | <=1 | 0.5    | <=4 | 4   | <=1 | 32  | <=1 | <=0.25 | <=0.5 |
| <=0.25 | <=1 |        | <=4 | 4   | <=1 |     | <=1 | <=0.25 | <=0.5 |
| <=0.25 | <=1 |        | <=4 | 8   | <=1 |     | <=1 | <=0.25 | <=0.5 |
| <=0.25 | <=1 |        | 16  | 8   | <=1 |     | <=1 | <=0.25 | >2    |
| <=0.25 | <=1 |        | 16  | 8   | <=1 |     | <=1 | <=0.25 | >2    |
| <=0.25 | <=1 |        | <=4 | 4   | <=1 |     | 2   | <=0.25 | <=0.5 |
| <=0.25 | <=1 |        | <=4 | 4   | <=1 |     | <=1 | <=0.25 | <=0.5 |
| <=0.25 | <=1 |        | <=4 | 4   | <=1 |     | >8  | <=0.25 | <=0.5 |
| <=0.25 | <=1 |        | <=4 | <=2 | <=1 |     | <=1 | <=0.25 | <=0.5 |
| <=0.25 | >16 |        | >16 | >16 | >32 |     | >8  | <=0.25 | >2    |
| <=0.25 | <=1 |        | >16 | >16 | 16  |     | <=1 | <=0.25 | >2    |
| <=0.25 | <=1 |        | <=4 | 4   | <=1 |     | <=1 | <=0.25 | >2    |
| <=0.25 | <=1 |        | <=4 | 4   | <=1 |     | <=1 | <=0.25 | <=0.5 |
| <=0.25 | <=1 | 0.5    | <=4 | 4   | <=1 | 32  | <=1 | <=0.25 | <=0.5 |
| <=0.25 | >16 | 1      | >16 | >16 | >32 | 16  | >8  | <=0.25 | >2    |
| <=0.25 | <=1 | 1      | <=4 | 8   | <=1 | 32  | >8  | <=0.25 | <=0.5 |
| <=0.25 | <=1 | 1      | 8   | 16  | <=1 | 32  | >8  | <=0.25 | <=0.5 |
| <=0.25 | <=1 | <=0.25 | <=4 | 4   | <=1 | 32  | <=1 | <=0.25 | <=0.5 |
| <=0.25 | <=1 |        | 8   | 8   | <=1 |     | <=1 | <=0.25 | >2    |
| <=0.25 | <=1 | 2      | <=4 | 4   | <=1 | 32  | <=1 | <=0.25 | <=0.5 |
| <=0.25 | <=1 | 0.5    | 8   | 8   | <=1 | 16  | >8  | <=0.25 | >2    |
| <=0.25 | <=1 | 16     | >16 | >16 | 4   | 4   | <=1 | <=0.25 | <=0.5 |
| <=0.25 | <=1 | 1      | <=4 | 4   | <=1 | 256 | <=1 | <=0.25 | >2    |
| <=0.25 | <=1 | 0.5    | <=4 | 8   | <=1 | 32  | <=1 | <=0.25 | <=0.5 |
| <=0.25 | <=1 | <=0.25 | <=4 | <=2 | <=1 | 32  | <=1 | <=0.25 | <=0.5 |
| <=0.25 | >16 | 16     | 16  | >16 | >32 | 32  | 2   | <=0.25 | >2    |
| <=0.25 | <=1 | 2      | <=4 | 4   | <=1 | 32  | <=1 | <=0.25 | <=0.5 |
| <=0.25 | <=1 | 1      | <=4 | 4   | <=1 | 16  | <=1 | <=0.25 | >2    |
| <=0.25 | <=1 | 0.5    | <=4 | <=2 | <=1 | 32  | >8  | <=0.25 | <=0.5 |
| <=0.25 | <=1 | 1      | <=4 | <=2 | <=1 | 32  | <=1 | <=0.25 | <=0.5 |
| <=0.25 | <=1 | 0.5    | <=4 | 4   | <=1 | 32  | <=1 | <=0.25 | >2    |
| <=0.25 | <=1 | 1      | 8   | 8   | <=1 | 16  | <=1 | <=0.25 | >2    |
| <=0.25 | <=1 | 1      | <=4 | 16  | <=1 | 32  | <=1 | <=0.25 | >2    |
| <=0.25 | <=1 | 1      | <=4 | 4   | <=1 | 32  | <=1 | <=0.25 | >2    |
| <=0.25 | 4   | 1      | >16 | >16 | >32 | 32  | >8  | <=0.25 | >2    |
| <=0.25 | <=1 | 0.5    | <=4 | 4   | <=1 | 16  | <=1 | <=0.25 | >2    |
| <=0.25 | <=1 | 4      | >16 | >16 | 16  | 8   | >8  | <=0.25 | >2    |
| <=0.25 | <=1 | 2      | <=4 | 4   | <=1 | 16  | <=1 | <=0.25 | >2    |
| <=0.25 | <=1 | 1      | <=4 | 4   | <=1 | 32  | <=1 | <=0.25 | >2    |
| <=0.25 | <=1 |        | <=4 | 4   | <=1 |     | <=1 | <=0.25 | <=0.5 |
| <=0.25 | <=1 | 1      | <=4 | <=2 | <=1 | 16  | <=1 | <=0.25 | >2    |
| <=0.25 | <=1 | 0.5    | <=4 | 4   | <=1 | 32  | <=1 | <=0.25 | <=0.5 |
| <=0.25 | >16 | 2      | 16  | >16 | >32 | 16  | 2   | <=0.25 | >2    |
| <=0.25 | <=1 | 2      | <=4 | <=2 | <=1 | 32  | <=1 | <=0.25 | <=0.5 |
| <=0.25 | >16 | 2      | 8   | >16 | >32 | 32  | <=1 | <=0.25 | <=0.5 |
| <=0.25 | 8   | 0.5    | <=4 | >16 | >32 | 16  | <=1 | <=0.25 | >2    |
| <=0.25 | <=1 | 1      | 8   | 8   | <=1 | 32  | <=1 | <=0.25 | <=0.5 |
| <=0.25 | <=1 |        | 16  | 4   | <=1 |     | >8  | <=0.25 | >2    |
| <=0.25 | <=1 | 0.5    | <=4 | 4   | <=1 | 32  | <=1 | <=0.25 | <=0.5 |
| <=0.25 | <=1 | 0.5    | <=4 | 8   | <=1 | 32  | >8  | <=0.25 | <=0.5 |
| <=0.25 | <=1 | 1      | 8   | 8   | <=1 | 16  | >8  | <=0.25 | >2    |

|        |     |        |     |     |     |     |     |        |       |
|--------|-----|--------|-----|-----|-----|-----|-----|--------|-------|
| <=0.25 | <=1 | 1      | <=4 | 4   | <=1 | 16  | <=1 | <=0.25 | <=0.5 |
| <=0.25 | <=1 | 2      | 8   | 8   | <=1 | 32  | <=1 | <=0.25 | >2    |
| <=0.25 | <=1 | 1      | <=4 | 4   | <=1 | 32  | <=1 | <=0.25 | <=0.5 |
| <=0.25 | <=1 | 1      | <=4 | <=2 | <=1 | 16  | <=1 | <=0.25 | >2    |
| <=0.25 | >16 | 1      | <=4 | >16 | >32 | 32  | <=1 | <=0.25 | <=0.5 |
| <=0.25 | <=1 | 0.5    | <=4 | 4   | <=1 | 128 | >8  | <=0.25 | >2    |
| <=0.25 | <=1 | 0.5    | <=4 | <=2 | <=1 | 32  | <=1 | <=0.25 | >2    |
| <=0.25 | <=1 | 2      | 8   | 8   | <=1 | 32  | <=1 | <=0.25 | >2    |
| <=0.25 | >16 | 2      | 16  | >16 | >32 | 32  | >8  | <=0.25 | <=0.5 |
| <=0.25 | <=1 |        | 8   | 16  | <=1 |     | >8  | <=0.25 | <=0.5 |
| <=0.25 | <=1 | 1      | 8   | 8   | <=1 | 128 | <=1 | <=0.25 | <=0.5 |
| <=0.25 | <=1 |        | 8   | 8   | <=1 |     | <=1 | <=0.25 | <=0.5 |
| <=0.25 | <=1 | 0.5    | <=4 | 4   | <=1 | 32  | >8  | <=0.25 | >2    |
| <=0.25 | <=1 | 0.5    | 8   | 4   | <=1 | 32  | >8  | <=0.25 | >2    |
| <=0.25 | <=1 | 2      | <=4 | 8   | <=1 | 16  | <=1 | <=0.25 | >2    |
| <=0.25 | <=1 | 8      | <=4 | 4   | <=1 | 16  | <=1 | <=0.25 | >2    |
| <=0.25 | <=1 |        | 8   | 8   | <=1 |     | <=1 | <=0.25 | <=0.5 |
| <=0.25 | <=1 |        | 8   | 8   | <=1 |     | <=1 | <=0.25 | <=0.5 |
| <=0.25 | <=1 |        | <=4 | 4   | <=1 |     | <=1 | <=0.25 | <=0.5 |
| <=0.25 | <=1 |        | 8   | 8   | <=1 |     | <=1 | <=0.25 | 1     |
| <=0.25 | <=1 |        | <=4 | 4   | <=1 |     | <=1 | <=0.25 | <=0.5 |
| <=0.25 | <=1 |        | <=4 | <=2 | <=1 |     | <=1 | <=0.25 | <=0.5 |
| <=0.25 | <=1 |        | <=4 | 4   | <=1 |     | <=1 | <=0.25 | >2    |
| <=0.25 | <=1 |        | <=4 | 4   | <=1 |     | <=1 | <=0.25 | <=0.5 |
| <=0.25 | <=1 |        | <=4 | 4   | <=1 |     | <=1 | <=0.25 | >2    |
| <=0.25 | <=1 |        | <=4 | 4   | <=1 |     | <=1 | <=0.25 | <=0.5 |
| <=0.25 | <=1 |        | <=4 | 4   | <=1 |     | <=1 | <=0.25 | >2    |
| <=0.25 | <=1 |        | <=4 | <=2 | <=1 |     | <=1 | <=0.25 | >2    |
| <=0.25 | <=1 |        | <=4 | 4   | <=1 |     | <=1 | <=0.25 | <=0.5 |
| <=0.25 | <=1 |        | <=4 | 4   | <=1 |     | <=1 | <=0.25 | >2    |
| <=0.25 | <=1 | 1      | <=4 | 4   | <=1 | 32  | <=1 | <=0.25 | >2    |
| <=0.25 | <=1 |        | <=4 | 4   | <=1 |     | 8   | <=0.25 | >2    |
| <=0.25 | <=1 | 2      | <=4 | 4   | <=1 | 16  | <=1 | <=0.25 | >2    |
| <=0.25 | <=1 | 2      | >16 | >16 | 8   | 16  | <=1 | <=0.25 | <=0.5 |
| <=0.25 | <=1 | 2      | >16 | >16 | 8   | 32  | <=1 | <=0.25 | <=0.5 |
| <=0.25 | <=1 | 1      | <=4 | <=2 | <=1 | 16  | <=1 | <=0.25 | <=0.5 |
| <=0.25 | <=1 |        | >16 | >16 | 16  |     | <=1 | <=0.25 | >2    |
| <=0.25 | <=1 | 1      | <=4 | 4   | <=1 | 32  | <=1 | <=0.25 | <=0.5 |
| <=0.25 | <=1 |        | <=4 | 8   | <=1 |     | <=1 | <=0.25 | >2    |
| <=0.25 | <=1 | 1      | <=4 | 8   | <=1 | 16  | <=1 | <=0.25 | >2    |
| <=0.25 | <=1 | 1      | <=4 | 4   | <=1 | 32  | >8  | <=0.25 | >2    |
| <=0.25 | <=1 | 0.5    | <=4 | 4   | <=1 | 32  | <=1 | <=0.25 | >2    |
| <=0.25 | <=1 | 2      | <=4 | 8   | <=1 | 16  | <=1 | <=0.25 | >2    |
| <=0.25 | <=1 | 0.5    | 8   | 4   | <=1 | 32  | <=1 | <=0.25 | <=0.5 |
| <=0.25 | <=1 | 1      | <=4 | <=2 | <=1 | 16  | >8  | <=0.25 | <=0.5 |
| <=0.25 | <=1 |        | <=4 | 8   | <=1 |     | <=1 | <=0.25 | <=0.5 |
| <=0.25 | <=1 |        | 8   | 8   | <=1 |     | <=1 | <=0.25 | >2    |
| <=0.25 | <=1 |        | <=4 | 4   | <=1 |     | <=1 | <=0.25 | >2    |
| <=0.25 | >16 |        | 16  | >16 | >32 |     | <=1 | <=0.25 | >2    |
| <=0.25 | <=1 |        | <=4 | 8   | <=1 |     | >8  | <=0.25 | >2    |
| <=0.25 | 2   |        | >16 | >16 | 16  |     | >8  | <=0.25 | <=0.5 |
| <=0.25 | <=1 |        | <=4 | 4   | <=1 |     | <=1 | <=0.25 | <=0.5 |
| <=0.25 | <=1 |        | <=4 | 8   | <=1 |     | >8  | <=0.25 | >2    |
| <=0.25 | <=1 |        | <=4 | 4   | <=1 |     | 2   | <=0.25 | <=0.5 |
| <=0.25 | <=1 |        | <=4 | <=2 | <=1 |     | <=1 | <=0.25 | <=0.5 |
| <=0.25 | <=1 |        | <=4 | 4   | <=1 |     | <=1 | <=0.25 | <=0.5 |
| <=0.25 | <=1 |        | 8   | 8   | <=1 |     | >8  | <=0.25 | >2    |
| <=0.25 | <=1 | <=0.25 | 8   | <=2 | <=1 | 16  | 4   | <=0.25 | >2    |
| <=0.25 | <=1 | 1      | <=4 | 4   | <=1 | 16  | <=1 | <=0.25 | >2    |
| <=0.25 | <=1 |        | <=4 | 4   | <=1 |     | <=1 | <=0.25 | <=0.5 |
| <=0.25 | <=1 | 0.5    | 8   | 8   | <=1 | 32  | 8   | <=0.25 | >2    |

|        |     |        |     |     |     |    |     |        |       |
|--------|-----|--------|-----|-----|-----|----|-----|--------|-------|
| <=0.25 | <=1 | 0.5    | <=4 | 4   | <=1 | 32 | <=1 | <=0.25 | >2    |
| <=0.25 | <=1 | 8      | <=4 | <=2 | <=1 | 64 | >8  | <=0.25 | >2    |
| <=0.25 | <=1 | 1      | <=4 | 4   | <=1 | 32 | <=1 | <=0.25 | <=0.5 |
| <=0.25 | <=1 |        | <=4 | 8   | <=1 |    | <=1 | <=0.25 | >2    |
| <=0.25 | <=1 | 1      | <=4 | 4   | <=1 | 4  | <=1 | <=0.25 | <=0.5 |
| <=0.25 | <=1 | 2      | <=4 | 4   | <=1 | 16 | >8  | <=0.25 | <=0.5 |
| <=0.25 | <=1 |        | <=4 | 4   | <=1 |    | <=1 | <=0.25 | <=0.5 |
| <=0.25 | <=1 |        | <=4 | 4   | <=1 |    | >8  | <=0.25 | <=0.5 |
| <=0.25 | <=1 |        | 8   | 4   | <=1 |    | <=1 | <=0.25 | <=0.5 |
| 2      | >16 | 1      | >16 | >16 | >32 | 16 | <=1 | <=0.25 | >2    |
| <=0.25 | >16 | <=0.25 | <=4 | >16 | >32 | 16 | <=1 | <=0.25 | >2    |
| <=0.25 | <=1 | 0.5    | <=4 | 8   | <=1 | 16 | <=1 | <=0.25 | <=0.5 |
| <=0.25 | <=1 | 1      | 8   | 8   | <=1 | 64 | <=1 | <=0.25 | >2    |
| <=0.25 | <=1 |        | <=4 | 8   | <=1 |    | >8  | <=0.25 | >2    |
| <=0.25 | <=1 |        | <=4 | 4   | <=1 |    | <=1 | <=0.25 | >2    |
| <=0.25 | <=1 | 1      | <=4 | 4   | <=1 | 16 | <=1 | <=0.25 | <=0.5 |
| <=0.25 | <=1 |        | 8   | 4   | <=1 |    | <=1 | <=0.25 | >2    |
| <=0.25 | <=1 |        | <=4 | 4   | <=1 |    | <=1 | <=0.25 | <=0.5 |
| <=0.25 | >16 |        | 16  | >16 | >32 |    | >8  | <=0.25 | <=0.5 |
| <=0.25 | <=1 |        | <=4 | 8   | <=1 |    | >8  | <=0.25 | >2    |
| <=0.25 | <=1 |        | <=4 | 4   | <=1 |    | 2   | <=0.25 | <=0.5 |
| <=0.25 | >16 |        | >16 | >16 | >32 |    | >8  | <=0.25 | >2    |
| <=0.25 | <=1 |        | 8   | 4   | <=1 |    | <=1 | <=0.25 | >2    |
| <=0.25 | <=1 |        | <=4 | 4   | <=1 |    | <=1 | <=0.25 | >2    |
| <=0.25 | <=1 |        | <=4 | 4   | <=1 |    | <=1 | <=0.25 | <=0.5 |
| <=0.25 | >16 |        | 16  | >16 | >32 |    | >8  | <=0.25 | >2    |
| <=0.25 | <=1 |        | <=4 | 4   | <=1 |    | <=1 | <=0.25 | <=0.5 |
| <=0.25 | <=1 | 0.5    | <=4 | <=2 | <=1 | 32 | <=1 | <=0.25 | <=0.5 |
| <=0.25 | <=1 | 0.5    | <=4 | 8   | <=1 | 32 | <=1 | <=0.25 | >2    |
| <=0.25 | <=1 |        | <=4 | 4   | <=1 |    | <=1 | <=0.25 | <=0.5 |
| <=0.25 | <=1 | <=0.25 | <=4 | <=2 | <=1 | 32 | <=1 | <=0.25 | <=0.5 |
| <=0.25 | <=1 | 0.5    | <=4 | 8   | <=1 | 16 | <=1 | <=0.25 | >2    |
| <=0.25 | <=1 | 0.5    | <=4 | <=2 | <=1 | 16 | >8  | 0.5    | <=0.5 |
| <=0.25 | <=1 | 1      | <=4 | 8   | <=1 | 32 | >8  | <=0.25 | >2    |
| <=0.25 | <=1 | 1      | <=4 | <=2 | <=1 | 32 | <=1 | <=0.25 | <=0.5 |
| <=0.25 | <=1 | 1      | >16 | >16 | 8   | 64 | <=1 | <=0.25 | >2    |
| <=0.25 | <=1 | 0.5    | 8   | 8   | <=1 | 16 | <=1 | <=0.25 | <=0.5 |
| <=0.25 | <=1 | 1      | <=4 | <=2 | <=1 | 16 | <=1 | <=0.25 | >2    |
| <=0.25 | <=1 | 1      | <=4 | 4   | <=1 | 16 | <=1 | <=0.25 | >2    |
| <=0.25 | <=1 | 1      | <=4 | 4   | <=1 | 32 | <=1 | <=0.25 | <=0.5 |
| <=0.25 | <=1 | 0.5    | >16 | 16  | <=1 | 32 | <=1 | <=0.25 | <=0.5 |
| <=0.25 | 2   | 1      | >16 | >16 | >32 | 8  | 8   | <=0.25 | >2    |
| <=0.25 | <=1 | 1      | 8   | 4   | <=1 | 16 | <=1 | <=0.25 | <=0.5 |
| <=0.25 | <=1 | 16     | 8   | 4   | <=1 | 16 | <=1 | <=0.25 | <=0.5 |
| <=0.25 | <=1 | 1      | <=4 | 8   | <=1 | 16 | >8  | <=0.25 | >2    |
| <=0.25 | 4   | 2      | <=4 | >16 | >32 | 32 | <=1 | <=0.25 | >2    |
| <=0.25 | <=1 | 0.5    | >16 | >16 | 16  | 16 | 2   | <=0.25 | <=0.5 |
| <=0.25 | <=1 | 0.5    | <=4 | 4   | <=1 | 32 | <=1 | <=0.25 | >2    |
| <=0.25 | <=1 | 4      | <=4 | 8   | <=1 | 32 | <=1 | <=0.25 | <=0.5 |
| <=0.25 | <=1 |        | <=4 | 4   | <=1 |    | <=1 | <=0.25 | <=0.5 |
| <=0.25 | <=1 |        | <=4 | 4   | <=1 |    | <=1 | <=0.25 | <=0.5 |
| <=0.25 | <=1 |        | >16 | >16 | 32  |    | >8  | <=0.25 | >2    |
| <=0.25 | <=1 | 1      | <=4 | <=2 | <=1 | 32 | <=1 | <=0.25 | <=0.5 |
| <=0.25 | <=1 |        | >16 | 16  | <=1 |    | >8  | <=0.25 | >2    |
| <=0.25 | <=1 | 0.5    | >16 | 8   | <=1 | 16 | >8  | <=0.25 | <=0.5 |
| <=0.25 | <=1 | 1      | 8   | 4   | <=1 | 16 | >8  | <=0.25 | >2    |
| <=0.25 | <=1 | 8      | >16 | 16  | <=1 | 64 | <=1 | <=0.25 | 1     |
| <=0.25 | 8   |        | 8   | >16 | >32 |    | <=1 | <=0.25 | >2    |
| <=0.25 | <=1 |        | <=4 | 4   | <=1 |    | <=1 | <=0.25 | <=0.5 |
| <=0.25 | 8   | 1      | 8   | >16 | >32 | 16 | >8  | <=0.25 | >2    |
| <=0.25 | <=1 | 0.5    | <=4 | 4   | <=1 | 16 | >8  | <=0.25 | <=0.5 |

|        |     |     |     |     |     |     |     |        |       |
|--------|-----|-----|-----|-----|-----|-----|-----|--------|-------|
| <=0.25 | <=1 | 2   | >16 | >16 | 32  | 64  | <=1 | <=0.25 | <=0.5 |
| <=0.25 | <=1 |     | 8   | 8   | <=1 |     | <=1 | <=0.25 | <=0.5 |
| <=0.25 | <=1 | 1   | <=4 | 4   | <=1 | 16  | <=1 | <=0.25 | <=0.5 |
| <=0.25 | <=1 | 1   | <=4 | 4   | <=1 | 32  | <=1 | <=0.25 | >2    |
| <=0.25 | <=1 | 2   | <=4 | 4   | <=1 | 32  | <=1 | <=0.25 | <=0.5 |
| <=0.25 | <=1 |     | <=4 | <=2 | <=1 |     | <=1 | <=0.25 | >2    |
| <=0.25 | <=1 | 64  | <=4 | 8   | <=1 | 64  | <=1 | <=0.25 | >2    |
| <=0.25 | <=1 | 0.5 | <=4 | 4   | <=1 | 32  | <=1 | <=0.25 | >2    |
| <=0.25 | <=1 | 1   | <=4 | 4   | <=1 | 32  | <=1 | <=0.25 | <=0.5 |
| <=0.25 | >16 |     | <=4 | >16 | >32 |     | >8  | <=0.25 | >2    |
| <=0.25 | >16 |     | 8   | >16 | >32 |     | >8  | <=0.25 | >2    |
| <=0.25 | <=1 |     | >16 | >16 | 8   |     | >8  | <=0.25 | >2    |
| <=0.25 | <=1 |     | 8   | 4   | <=1 |     | >8  | <=0.25 | >2    |
| <=0.25 | 4   |     | >16 | >16 | <=1 |     | <=1 | <=0.25 | >2    |
| <=0.25 | >16 |     | 8   | >16 | >32 |     | >8  | <=0.25 | <=0.5 |
| <=0.25 | 8   |     | <=4 | >16 | >32 |     | >8  | <=0.25 | >2    |
| <=0.25 | <=1 |     | <=4 | 4   | <=1 |     | >8  | <=0.25 | >2    |
| <=0.25 | <=1 |     | <=4 | 4   | <=1 |     | <=1 | <=0.25 | >2    |
| <=0.25 | <=1 |     | <=4 | 4   | <=1 |     | <=1 | <=0.25 | <=0.5 |
| <=0.25 | <=1 |     | <=4 | 4   | <=1 |     | <=1 | <=0.25 | >2    |
| <=0.25 | 4   |     | 8   | >16 | >32 |     | >8  | <=0.25 | >2    |
| <=0.25 | >16 |     | <=4 | >16 | >32 |     | <=1 | <=0.25 | <=0.5 |
| <=0.25 | >16 |     | <=4 | >16 | >32 |     | >8  | <=0.25 | >2    |
| <=0.25 | <=1 |     | 8   | 4   | <=1 |     | <=1 | <=0.25 | >2    |
| <=0.25 | <=1 | 1   | <=4 | <=2 | <=1 | 32  | <=1 | <=0.25 | <=0.5 |
| <=0.25 | <=1 | 0.5 | <=4 | 4   | <=1 | 32  | <=1 | <=0.25 | >2    |
| <=0.25 | <=1 | 0.5 | <=4 | <=2 | <=1 | 16  | <=1 | <=0.25 | <=0.5 |
| <=0.25 | <=1 |     | <=4 | <=2 | <=1 |     | <=1 | <=0.25 | >2    |
| <=0.25 | <=1 | 1   | >16 | >16 | 4   | 256 | >8  | <=0.25 | >2    |
| <=0.25 | <=1 | 1   | <=4 | <=2 | <=1 | 32  | <=1 | <=0.25 | >2    |
| <=0.25 | <=1 | 4   | 8   | 4   | <=1 | 16  | >8  | <=0.25 | >2    |
| <=0.25 | <=1 | 0.5 | 16  | 8   | <=1 | 64  | <=1 | <=0.25 | >2    |
| <=0.25 | >16 |     | <=4 | >16 | >32 |     | >8  | <=0.25 | >2    |
| <=0.25 | >16 |     | >16 | >16 | >32 |     | >8  | <=0.25 | >2    |
| <=0.25 | <=1 |     | <=4 | 4   | <=1 |     | <=1 | <=0.25 | <=0.5 |
| <=0.25 | >16 |     | <=4 | >16 | >32 |     | >8  | <=0.25 | >2    |
| <=0.25 | <=1 | 4   | <=4 | <=2 | <=1 | 32  | <=1 | <=0.25 | <=0.5 |
| <=0.25 | <=1 | 1   | <=4 | 4   | <=1 | 16  | <=1 | <=0.25 | >2    |
| <=0.25 | <=1 | 0.5 | <=4 | 4   | <=1 | 16  | <=1 | <=0.25 | <=0.5 |
| <=0.25 | <=1 | 0.5 | <=4 | 4   | <=1 | 32  | >8  | <=0.25 | <=0.5 |
| <=0.25 | <=1 | 0.5 | <=4 | 4   | <=1 | 32  | <=1 | <=0.25 | <=0.5 |
| <=0.25 | <=1 | 1   | 16  | 8   | <=1 | 32  | <=1 | <=0.25 | <=0.5 |
| <=0.25 | <=1 | 0.5 | <=4 | 4   | <=1 | 32  | <=1 | <=0.25 | <=0.5 |
| <=0.25 | <=1 | 0.5 | 8   | 8   | <=1 | 32  | <=1 | <=0.25 | <=0.5 |
| <=0.25 | 16  | 1   | 8   | >16 | >32 | 16  | <=1 | <=0.25 | <=0.5 |
| <=0.25 | <=1 |     | 8   | 8   | <=1 |     | >8  | <=0.25 | <=0.5 |
| <=0.25 | <=1 | 1   | <=4 | 4   | <=1 | 16  | <=1 | <=0.25 | >2    |
| <=0.25 | <=1 | 1   | 8   | 8   | <=1 | 32  | >8  | 0.5    | >2    |
| <=0.25 | 2   | 4   | >16 | >16 | 32  | 16  | >8  | <=0.25 | >2    |
| <=0.25 | <=1 | 1   | <=4 | 4   | <=1 | 32  | <=1 | <=0.25 | <=0.5 |
| <=0.25 | <=1 | 0.5 | <=4 | 4   | <=1 | 16  | >8  | <=0.25 | <=0.5 |
| <=0.25 | <=1 | 4   | 8   | 8   | <=1 | 128 | >8  | <=0.25 | >2    |
| <=0.25 | <=1 | 0.5 | 8   | 8   | <=1 | 32  | <=1 | <=0.25 | <=0.5 |
| <=0.25 | <=1 | 0.5 | <=4 | 4   | <=1 | 32  | <=1 | <=0.25 | <=0.5 |
| <=0.25 | <=1 | 32  | <=4 | 4   | <=1 | 32  | <=1 | <=0.25 | <=0.5 |
| <=0.25 | <=1 | 0.5 | <=4 | 4   | <=1 | 32  | <=1 | <=0.25 | <=0.5 |
| <=0.25 | <=1 | 1   | <=4 | <=2 | <=1 | 32  | <=1 | <=0.25 | <=0.5 |
| <=0.25 | 2   |     | 8   | >16 | 16  |     | 2   | <=0.25 | >2    |
| <=0.25 | <=1 |     | <=4 | 4   | <=1 |     | <=1 | <=0.25 | >2    |
| <=0.25 | <=1 |     | <=4 | 4   | <=1 |     | <=1 | <=0.25 | >2    |
| <=0.25 | <=1 |     | 8   | 8   | <=1 |     | <=1 | <=0.25 | >2    |

|        |     |     |     |     |     |     |        |        |       |
|--------|-----|-----|-----|-----|-----|-----|--------|--------|-------|
| <=0.25 | <=1 |     | 8   | 4   | <=1 | 2   | <=0.25 | <=0.5  |       |
| <=0.25 | <=1 |     | <=4 | 4   | <=1 | <=1 | <=0.25 | <=0.5  |       |
| <=0.25 | <=1 |     | <=4 | 8   | <=1 | >8  | <=0.25 | <=0.5  |       |
| <=0.25 | <=1 |     | <=4 | <=2 | <=1 | >8  | <=0.25 | >2     |       |
| <=0.25 | <=1 |     | <=4 | 4   | <=1 | <=1 | <=0.25 | 1      |       |
| <=0.25 | <=1 | 1   | 8   | 8   | <=1 | 32  | <=1    | <=0.25 | <=0.5 |
| <=0.25 | <=1 | 0.5 | <=4 | 8   | <=1 | 16  | <=1    | <=0.25 | >2    |
| <=0.25 | <=1 | 0.5 | 8   | 8   | <=1 | 32  | <=1    | <=0.25 | >2    |
| <=0.25 | <=1 | 1   | 8   | 4   | <=1 | 32  | <=1    | <=0.25 | >2    |
| <=0.25 | <=1 | 0.5 | <=4 | 4   | <=1 | 32  | <=1    | <=0.25 | <=0.5 |
| <=0.25 | <=1 | 0.5 | <=4 | 8   | <=1 | 32  | <=1    | <=0.25 | <=0.5 |
| <=0.25 | <=1 | 0.5 | <=4 | <=2 | <=1 | 32  | <=1    | <=0.25 | <=0.5 |
| <=0.25 | <=1 | 0.5 | <=4 | 4   | <=1 | 16  | 2      | <=0.25 | <=0.5 |
| <=0.25 | 4   | 2   | 16  | >16 | >32 | 4   | <=1    | <=0.25 | >2    |
| <=0.25 | <=1 | 1   | <=4 | 8   | <=1 | 16  | <=1    | <=0.25 | <=0.5 |
| <=0.25 | <=1 | 0.5 | <=4 | <=2 | <=1 | 32  | 2      | <=0.25 | <=0.5 |
| <=0.25 | <=1 | 0.5 | 16  | 16  | <=1 | 64  | 2      | <=0.25 | >2    |
| <=0.25 | >16 | 0.5 | <=4 | >16 | >32 | 32  | >8     | <=0.25 | >2    |
| <=0.25 | <=1 | 1   | <=4 | 4   | <=1 | 16  | <=1    | <=0.25 | >2    |
| <=0.25 | <=1 | 1   | <=4 | 4   | <=1 | 16  | <=1    | <=0.25 | <=0.5 |
| <=0.25 | <=1 | 1   | <=4 | 4   | <=1 | 16  | <=1    | <=0.25 | >2    |
| <=0.25 | <=1 | 0.5 | <=4 | 4   | <=1 | 32  | 8      | <=0.25 | >2    |
| <=0.25 | <=1 | 1   | <=4 | 4   | <=1 | 32  | <=1    | <=0.25 | <=0.5 |
| <=0.25 | <=1 | 0.5 | >16 | 16  | <=1 | 32  | >8     | <=0.25 | >2    |
| <=0.25 | <=1 | 1   | <=4 | 4   | <=1 | 16  | <=1    | <=0.25 | <=0.5 |
| <=0.25 | <=1 | 2   | <=4 | 4   | <=1 | 16  | <=1    | <=0.25 | <=0.5 |
| <=0.25 | <=1 | 0.5 | 16  | 8   | <=1 | 32  | <=1    | <=0.25 | <=0.5 |
| <=0.25 | <=1 | 0.5 | <=4 | 8   | <=1 | 32  | <=1    | <=0.25 | <=0.5 |
| <=0.25 | 4   | 0.5 | 8   | >16 | >32 | 16  | >8     | <=0.25 | <=0.5 |
| <=0.25 | >16 | 2   | 8   | >16 | >32 | 32  | >8     | <=0.25 | >2    |
| <=0.25 | <=1 |     | <=4 | 8   | <=1 |     | 2      | <=0.25 | >2    |
| <=0.25 | <=1 | 1   | <=4 | 4   | <=1 | 16  | 2      | <=0.25 | <=0.5 |
| <=0.25 | <=1 | 8   | <=4 | 4   | <=1 | 32  | <=1    | <=0.25 | <=0.5 |
| <=0.25 | <=1 | 8   | >16 | >16 | <=1 | 64  | >8     | <=0.25 | >2    |
| <=0.25 | <=1 | 2   | <=4 | 8   | <=1 | 32  | 2      | <=0.25 | >2    |
| <=0.25 | <=1 |     | <=4 | 8   | <=1 |     | <=1    | <=0.25 | <=0.5 |
| <=0.25 | <=1 | 0.5 | <=4 | 8   | <=1 | 32  | <=1    | <=0.25 | >2    |
| <=0.25 | <=1 |     | <=4 | 4   | <=1 |     | <=1    | <=0.25 | >2    |
| <=0.25 | <=1 | 0.5 | <=4 | <=2 | <=1 | 32  | <=1    | <=0.25 | <=0.5 |
| <=0.25 | <=1 |     | <=4 | 8   | <=1 |     | >8     | <=0.25 | >2    |
| <=0.25 | <=1 |     | <=4 | 4   | <=1 |     | <=1    | <=0.25 | >2    |
| <=0.25 | <=1 |     | <=4 | 4   | <=1 |     | <=1    | <=0.25 | >2    |
| <=0.25 | <=1 |     | 16  | 8   | <=1 |     | >8     | <=0.25 | <=0.5 |
| <=0.25 | <=1 | 1   | <=4 | <=2 | <=1 | 16  | <=1    | <=0.25 | <=0.5 |
| <=0.25 | <=1 |     | >16 | >16 |     | 8   | >8     | <=0.25 | >2    |
| <=0.25 | <=1 |     | <=4 | <=2 | <=1 |     | <=1    | <=0.25 | >2    |
| 0.5    | 2   |     | >16 | >16 |     | 32  | <=1    | 1      | >2    |
| <=0.25 | 4   |     | <=4 | >16 | >32 |     | <=1    | <=0.25 | >2    |
| <=0.25 | <=1 |     | <=4 | 8   | <=1 |     | 4      | <=0.25 | <=0.5 |
| <=0.25 | 4   | 2   | <=4 | >16 | >32 | 32  | >8     | <=0.25 | <=0.5 |
| <=0.25 | <=1 | 1   | <=4 | <=2 | <=1 | 32  | <=1    | <=0.25 | >2    |
| <=0.25 | <=1 | 0.5 | <=4 | 8   | <=1 | 32  | <=1    | <=0.25 | <=0.5 |
| <=0.25 | <=1 | 1   | <=4 | 4   | <=1 | 16  | <=1    | <=0.25 | <=0.5 |
| <=0.25 | <=1 | 0.5 | <=4 | 4   | <=1 | 32  | <=1    | <=0.25 | <=0.5 |
| <=0.25 | <=1 | 1   | <=4 | 4   | <=1 | 16  | <=1    | <=0.25 | <=0.5 |
| <=0.25 | <=1 |     | <=4 | 8   | <=1 |     | <=1    | <=0.25 | >2    |
| <=0.25 | <=1 | 2   | <=4 | <=2 | <=1 | 32  | <=1    | <=0.25 | >2    |
| <=0.25 | <=1 | 1   | 8   | 8   | <=1 | 32  | >8     | <=0.25 | >2    |
| <=0.25 | 16  | 4   | <=4 | >16 | >32 | 16  | >8     | <=0.25 | <=0.5 |
| <=0.25 | <=1 | 0.5 | <=4 | 4   | <=1 | 32  | <=1    | <=0.25 | <=0.5 |
| <=0.25 | <=1 | 0.5 | <=4 | 4   | <=1 | 32  | <=1    | <=0.25 | >2    |



|        |     |        |     |     |     |    |     |        |       |
|--------|-----|--------|-----|-----|-----|----|-----|--------|-------|
| <=0.25 | <=1 | 1      | 16  | 4   | <=1 | 32 | <=1 | <=0.25 | <=0.5 |
| <=0.25 | <=1 | 0.5    | <=4 | 4   | <=1 | 32 | >8  | <=0.25 | >2    |
| <=0.25 | <=1 | <=0.25 | <=4 | <=2 | <=1 | 16 | <=1 | <=0.25 | >2    |
| <=0.25 | <=1 | 0.5    | <=4 | 4   | <=1 | 32 | <=1 | <=0.25 | <=0.5 |
| <=0.25 | <=1 | 0.5    | >16 | >16 | 8   | 32 | >8  | <=0.25 | >2    |
| <=0.25 | <=1 | 0.5    | >16 | >16 | 8   | 16 | >8  | <=0.25 | >2    |
| <=0.25 | <=1 | 0.5    | <=4 | 8   | <=1 | 32 | <=1 | <=0.25 | <=0.5 |
| <=0.25 | <=1 | 0.5    | <=4 | 4   | <=1 | 32 | <=1 | <=0.25 | >2    |
| <=0.25 | >16 | 1      | 8   | >16 | >32 | 32 | >8  | <=0.25 | >2    |
| <=0.25 | <=1 | 1      | <=4 | 4   | <=1 | 32 | 4   | <=0.25 | <=0.5 |
| <=0.25 | <=1 |        | 16  | >16 | <=1 |    | 8   | <=0.25 | >2    |
| <=0.25 | <=1 |        | <=4 | 4   | <=1 |    | <=1 | <=0.25 | >2    |
| <=0.25 | <=1 |        | <=4 | <=2 | <=1 |    | >8  | <=0.25 | <=0.5 |
| <=0.25 | <=1 |        | <=4 | <=2 | <=1 |    | <=1 | <=0.25 | <=0.5 |
| <=0.25 | <=1 |        | <=4 | 4   | <=1 |    | <=1 | <=0.25 | <=0.5 |
| <=0.25 | <=1 |        | <=4 | 8   | <=1 |    | <=1 | <=0.25 | <=0.5 |
| <=0.25 | <=1 |        | <=4 | <=2 | <=1 |    | <=1 | <=0.25 | <=0.5 |
| <=0.25 | <=1 |        | >16 | 16  | 8   |    | <=1 | <=0.25 | <=0.5 |
| <=0.25 | <=1 |        | 8   | 8   | <=1 |    | >8  | <=0.25 | <=0.5 |
| <=0.25 | 8   |        | <=4 | >16 | >32 |    | <=1 | <=0.25 | >2    |
| <=0.25 | <=1 |        | <=4 | 4   | <=1 |    | 8   | <=0.25 | <=0.5 |
| <=0.25 | <=1 |        | <=4 | 4   | <=1 |    | <=1 | <=0.25 | <=0.5 |
| <=0.25 | <=1 |        | <=4 | 4   | <=1 |    | <=1 | <=0.25 | >2    |
| <=0.25 | <=1 |        | <=4 | 4   | <=1 |    | <=1 | <=0.25 | >2    |
| <=0.25 | <=1 |        | <=4 | 8   | <=1 |    | <=1 | <=0.25 | <=0.5 |
| <=0.25 | >16 |        | 16  | >16 | >32 |    | <=1 | <=0.25 | >2    |
| <=0.25 | <=1 | 1      | <=4 | 4   | <=1 | 32 | >8  | <=0.25 | >2    |
| <=0.25 | <=1 | 1      | <=4 | 4   | <=1 | 16 | <=1 | <=0.25 | <=0.5 |
| <=0.25 | <=1 | 0.5    | <=4 | 8   | <=1 | 32 | <=1 | <=0.25 | <=0.5 |
| <=0.25 | <=1 | 1      | 16  | 16  | <=1 | 32 | <=1 | <=0.25 | >2    |
| <=0.25 | <=1 | 2      | <=4 | 4   | <=1 | 32 | <=1 | <=0.25 | <=0.5 |
| <=0.25 | <=1 | 2      | <=4 | 4   | <=1 | 32 | <=1 | <=0.25 | <=0.5 |
| <=0.25 | <=1 | 0.5    | <=4 | 4   | <=1 | 32 | <=1 | <=0.25 | >2    |
| <=0.25 | <=1 | 64     | <=4 | 4   | <=1 | 32 | <=1 | <=0.25 | <=0.5 |
| <=0.25 | <=1 | 8      | <=4 | 8   | <=1 | 32 | <=1 | <=0.25 | <=0.5 |
| <=0.25 | <=1 | 0.5    | 8   | 4   | <=1 | 32 | <=1 | <=0.25 | <=0.5 |
| <=0.25 | <=1 | 2      | <=4 | 4   | <=1 | 32 | >8  | <=0.25 | >2    |
| <=0.25 | <=1 | 0.5    | <=4 | 4   | <=1 | 32 | <=1 | <=0.25 | <=0.5 |
| <=0.25 | <=1 | 1      | <=4 | 4   | <=1 | 32 | 8   | <=0.25 | <=0.5 |
| <=0.25 | <=1 | 1      | 8   | 4   | <=1 | 16 | <=1 | <=0.25 | >2    |
| <=0.25 | <=1 | 1      | <=4 | 4   | <=1 | 16 | <=1 | <=0.25 | >2    |
| <=0.25 | <=1 | 0.5    | <=4 | <=2 | <=1 | 32 | <=1 | <=0.25 | <=0.5 |
| <=0.25 | <=1 | 0.5    | <=4 | 8   | <=1 | 32 | <=1 | <=0.25 | <=0.5 |
| <=0.25 | <=1 | 1      | <=4 | 4   | <=1 | 32 | <=1 | <=0.25 | <=0.5 |
| <=0.25 | <=1 | 1      | <=4 | 4   | <=1 | 32 | <=1 | <=0.25 | <=0.5 |
| <=0.25 | <=1 | 1      | <=4 | 4   | <=1 | 32 | <=1 | <=0.25 | >2    |
| <=0.25 | <=1 | 0.5    | 8   | 4   | <=1 | 32 | <=1 | <=0.25 | <=0.5 |
| <=0.25 | <=1 | 1      | 8   | 4   | <=1 | 16 | <=1 | <=0.25 | <=0.5 |
| <=0.25 | <=1 | 1      | <=4 | <=2 | <=1 | 8  | <=1 | <=0.25 | <=0.5 |
| <=0.25 | <=1 | 1      | >16 | >16 | 16  | 32 | 8   | <=0.25 | >2    |
| <=0.25 | <=1 | 1      | <=4 | 4   | <=1 | 32 | <=1 | <=0.25 | <=0.5 |
| <=0.25 | <=1 | 0.5    | <=4 | 4   | <=1 | 32 | >8  | <=0.25 | >2    |
| <=0.25 | <=1 | 0.5    | <=4 | 4   | <=1 | 16 | >8  | <=0.25 | >2    |
| <=0.25 | <=1 | 2      | <=4 | 4   | <=1 | 32 | <=1 | <=0.25 | >2    |
| <=0.25 | <=1 | 0.5    | <=4 | <=2 | <=1 | 32 | 2   | <=0.25 | <=0.5 |
| <=0.25 | <=1 | 1      | <=4 | <=2 | <=1 | 16 | <=1 | <=0.25 | <=0.5 |
| <=0.25 | <=1 |        | <=4 | 8   | <=1 |    | >8  | <=0.25 | >2    |
| <=0.25 | <=1 |        | <=4 | 4   | <=1 |    | <=1 | <=0.25 | <=0.5 |
| <=0.25 | <=1 |        | 8   | 4   | <=1 |    | <=1 | <=0.25 | <=0.5 |
| <=0.25 | <=1 | 1      | 8   | 8   | <=1 | 16 | >8  | <=0.25 | >2    |
| 2      | >16 | 2      | >16 | >16 | >32 | 32 | >8  | <=0.25 | >2    |

|        |     |        |     |     |     |     |     |        |       |
|--------|-----|--------|-----|-----|-----|-----|-----|--------|-------|
| <=0.25 | >16 | 16     | 16  | >16 | >32 | 16  | >8  | <=0.25 | >2    |
| <=0.25 | >16 | 0.5    | >16 | >16 | >32 | 128 | <=1 | <=0.25 | >2    |
| <=0.25 | <=1 | 1      | 8   | 8   | <=1 | 32  | >8  | <=0.25 | >2    |
| <=0.25 | <=1 | 1      | 16  | 8   | <=1 | 32  | <=1 | <=0.25 | <=0.5 |
| <=0.25 | <=1 | 1      | <=4 | 4   | <=1 | 64  | <=1 | <=0.25 | >2    |
| <=0.25 | <=1 | 1      | 8   | 8   | <=1 | 32  | >8  | <=0.25 | >2    |
| <=0.25 | <=1 | 1      | <=4 | 4   | <=1 | 32  | <=1 | <=0.25 | <=0.5 |
| <=0.25 | <=1 | 0.5    | <=4 | 8   | <=1 | 32  | <=1 | <=0.25 | >2    |
| <=0.25 | <=1 | 0.5    | <=4 | 8   | <=1 | 32  | <=1 | <=0.25 | <=0.5 |
| <=0.25 | <=1 | 0.5    | <=4 | 4   | <=1 | 32  | <=1 | <=0.25 | <=0.5 |
| <=0.25 | <=1 | 0.5    | <=4 | 4   | <=1 | 32  | <=1 | <=0.25 | <=0.5 |
| <=0.25 | <=1 | 1      | 8   | 8   | <=1 | 32  | <=1 | <=0.25 | <=0.5 |
| <=0.25 | <=1 | 1      | <=4 | 4   | <=1 | 32  | <=1 | <=0.25 | >2    |
| <=0.25 | <=1 | 0.5    | <=4 | <=2 | <=1 | 32  | <=1 | <=0.25 | <=0.5 |
| 4      | 16  |        | >16 | >16 | >32 |     | <=1 | 4      | <=0.5 |
| <=0.25 | <=1 |        | <=4 | 4   | <=1 |     | <=1 | <=0.25 | <=0.5 |
| <=0.25 | >16 |        | 8   | >16 | >32 |     | <=1 | <=0.25 | <=0.5 |
| <=0.25 | <=1 |        | >16 | 16  | 8   |     | <=1 | <=0.25 | >2    |
| <=0.25 | <=1 |        | <=4 | 8   | <=1 |     | <=1 | <=0.25 | >2    |
| <=0.25 | <=1 |        | <=4 | >16 | 8   |     | <=1 | <=0.25 | >2    |
| <=0.25 | <=1 |        | 8   | 8   | <=1 |     | <=1 | <=0.25 | >2    |
| <=0.25 | <=1 |        | <=4 | 4   | <=1 |     | <=1 | <=0.25 | >2    |
| <=0.25 | <=1 |        | <=4 | 4   | <=1 |     | <=1 | <=0.25 | >2    |
| <=0.25 | <=1 |        | <=4 | 8   | <=1 |     | <=1 | <=0.25 | >2    |
| <=0.25 | <=1 |        | 16  | 16  | <=1 |     | 4   | <=0.25 | 1     |
| <=0.25 | <=1 |        | <=4 | 8   | <=1 |     | <=1 | <=0.25 | <=0.5 |
| <=0.25 | <=1 |        | <=4 | 8   | <=1 |     | 4   | <=0.25 | >2    |
| <=0.25 | <=1 |        | <=4 | 4   | <=1 |     | <=1 | <=0.25 | >2    |
| <=0.25 | <=1 |        | >16 | >16 | 8   |     | <=1 | <=0.25 | <=0.5 |
| <=0.25 | <=1 |        | <=4 | 8   | <=1 |     | >8  | <=0.25 | >2    |
| <=0.25 | <=1 |        | <=4 | 4   | <=1 |     | 2   | <=0.25 | >2    |
| <=0.25 | <=1 |        | <=4 | 4   | <=1 |     | <=1 | <=0.25 | <=0.5 |
| <=0.25 | <=1 |        | <=4 | 8   | <=1 |     | >8  | <=0.25 | >2    |
| <=0.25 | <=1 |        | >16 | >16 | 4   |     | >8  | <=0.25 | >2    |
| <=0.25 | <=1 |        | 16  | 16  | <=1 |     | <=1 | <=0.25 | >2    |
| <=0.25 | <=1 |        | <=4 | <=2 | <=1 |     | <=1 | <=0.25 | <=0.5 |
| <=0.25 | <=1 |        | <=4 | 4   | <=1 |     | <=1 | <=0.25 | <=0.5 |
| <=0.25 | <=1 |        | >16 | >16 | 16  |     | >8  | <=0.25 | >2    |
| <=0.25 | <=1 |        | 8   | 16  | <=1 |     | <=1 | <=0.25 | <=0.5 |
| <=0.25 | <=1 | 0.5    | <=4 | <=2 | <=1 | 16  | 4   | <=0.25 | >2    |
| <=0.25 | <=1 | <=0.25 | <=4 | 4   | <=1 | 32  | 2   | <=0.25 | <=0.5 |
| <=0.25 | <=1 | 2      | <=4 | 4   | <=1 | 32  | <=1 | <=0.25 | >2    |
| <=0.25 | <=1 | 0.5    | <=4 | 4   | <=1 | 16  | <=1 | <=0.25 | <=0.5 |
| <=0.25 | >16 | 0.5    | >16 | >16 | >32 | 32  | <=1 | <=0.25 | >2    |
| <=0.25 | <=1 | 0.5    | <=4 | <=2 | <=1 | 32  | >8  | <=0.25 | >2    |
| <=0.25 | <=1 | 4      | 8   | 8   | <=1 | 64  | <=1 | <=0.25 | <=0.5 |
| <=0.25 | <=1 | 1      | <=4 | 16  | <=1 | 32  | <=1 | <=0.25 | <=0.5 |
| <=0.25 | <=1 | 1      | <=4 | 4   | <=1 | 16  | <=1 | <=0.25 | <=0.5 |
| <=0.25 | <=1 | 0.5    | <=4 | <=2 | <=1 | 32  | <=1 | <=0.25 | <=0.5 |
| <=0.25 | <=1 | 1      | <=4 | 4   | <=1 | 32  | <=1 | <=0.25 | <=0.5 |
| <=0.25 | >16 |        | 8   | >16 | >32 |     | >8  | <=0.25 | >2    |
| <=0.25 | <=1 | 0.5    | <=4 | 8   | <=1 | 16  | <=1 | <=0.25 | <=0.5 |
| <=0.25 | <=1 | 0.5    | 8   | 8   | <=1 | 32  | >8  | <=0.25 | >2    |
| <=0.25 | <=1 |        | <=4 | 4   | <=1 |     | <=1 | <=0.25 | <=0.5 |
| <=0.25 | <=1 |        | 8   | 4   | <=1 |     | <=1 | <=0.25 | <=0.5 |
| <=0.25 | <=1 |        | <=4 | 4   | <=1 |     | <=1 | <=0.25 | <=0.5 |
| <=0.25 | <=1 |        | <=4 | 8   | <=1 |     | 8   | <=0.25 | >2    |
| <=0.25 | <=1 |        | <=4 | 4   | <=1 |     | >8  | <=0.25 | >2    |
| <=0.25 | <=1 |        | <=4 | 4   | <=1 |     | <=1 | <=0.25 | >2    |
| <=0.25 | 8   |        | <=4 | >16 | >32 |     | >8  | <=0.25 | <=0.5 |
| <=0.25 | <=1 |        | <=4 | 4   | <=1 |     | <=1 | <=0.25 | <=0.5 |
| <=0.25 | <=1 |        | <=4 | 4   | <=1 |     | <=1 | <=0.25 | >2    |



|             |          |          |          |          |          |             |            |
|-------------|----------|----------|----------|----------|----------|-------------|------------|
| $\leq 0.25$ | $\leq 1$ | $> 16$   | $> 16$   | 32       | $> 8$    | $\leq 0.25$ | $> 2$      |
| $\leq 0.25$ | $\leq 1$ | 8        | 4        | $\leq 1$ | $> 8$    | $\leq 0.25$ | $\leq 0.5$ |
| $\leq 0.25$ | $\leq 1$ | 8        | 8        | $\leq 1$ | $\leq 1$ | $\leq 0.25$ | $> 2$      |
| $\leq 0.25$ | $\leq 1$ | $\leq 4$ | 4        | $\leq 1$ | $\leq 1$ | $\leq 0.25$ | $> 2$      |
| $\leq 0.25$ | $\leq 1$ | $\leq 4$ | 4        | $\leq 1$ | 2        | $\leq 0.25$ | $\leq 0.5$ |
| $\leq 0.25$ | $\leq 1$ | $> 16$   | $> 16$   | 8        | $\leq 1$ | $\leq 0.25$ | $> 2$      |
| $\leq 0.25$ | $> 16$   | $\leq 4$ | $> 16$   | $> 32$   | $\leq 1$ | $\leq 0.25$ | $\leq 0.5$ |
| $\leq 0.25$ | $\leq 1$ | $\leq 4$ | $\leq 2$ | $\leq 1$ | $\leq 1$ | $\leq 0.25$ | $\leq 0.5$ |
| $\leq 0.25$ | $\leq 1$ | $\leq 4$ | 4        | $\leq 1$ | $\leq 1$ | $\leq 0.25$ | $> 2$      |
| $\leq 0.25$ | $\leq 1$ | $\leq 4$ | 4        | $\leq 1$ | $\leq 1$ | $\leq 0.25$ | $\leq 0.5$ |

| TCY_M | TGC_M | TZP_M | ESBL Phenotypic Confirmatory test | ESBL PCR result | AmpC PCR result - | ESBL/AmpC PCR Status |
|-------|-------|-------|-----------------------------------|-----------------|-------------------|----------------------|
| <=1   |       |       |                                   |                 |                   |                      |
| >8    |       |       | Pos                               | SHV             | Neg               | Pos/Neg              |
| >8    |       |       | Neg                               | Neg             | CMY               | Neg/Pos              |
| >8    |       |       |                                   |                 |                   |                      |
| >8    |       |       |                                   |                 |                   |                      |
| 2     |       |       |                                   |                 |                   |                      |
| >8    |       |       |                                   |                 |                   |                      |
| 2     |       |       |                                   |                 |                   |                      |
| >8    |       |       |                                   |                 |                   |                      |
| >8    |       |       |                                   |                 |                   |                      |
| >8    |       |       |                                   |                 |                   |                      |
| <=1   |       |       |                                   |                 |                   |                      |
| >8    |       |       |                                   |                 |                   |                      |
| >8    |       |       |                                   |                 |                   |                      |
| >8    |       |       |                                   |                 |                   |                      |
| 2     |       |       |                                   |                 |                   |                      |
| >8    |       |       |                                   |                 |                   |                      |
| 2     |       |       |                                   |                 |                   |                      |
| >8    |       |       |                                   |                 |                   |                      |
| >8    |       |       |                                   |                 |                   |                      |
| 2     |       |       |                                   |                 |                   |                      |
| 2     |       |       |                                   |                 |                   |                      |
| >8    |       |       |                                   |                 |                   |                      |
| >8    |       |       |                                   |                 |                   |                      |
| 2     |       |       | Neg                               | Neg             | CMY               | Neg/Pos              |
| 2     |       |       |                                   |                 |                   |                      |
| >8    |       |       |                                   |                 |                   |                      |
| >8    |       |       |                                   |                 |                   |                      |
| 2     |       |       |                                   |                 |                   |                      |
| >8    |       |       |                                   |                 |                   |                      |
| >8    |       |       |                                   |                 |                   |                      |
| >8    |       |       |                                   |                 |                   |                      |
| >8    |       |       |                                   |                 |                   |                      |
| >8    |       |       |                                   |                 |                   |                      |
| <=1   |       |       |                                   |                 |                   |                      |
| >8    |       |       |                                   |                 |                   |                      |
| >8    |       |       |                                   |                 |                   |                      |
| <=1   |       |       |                                   |                 |                   |                      |
| >8    |       |       |                                   |                 |                   |                      |
| 4     |       |       |                                   |                 |                   |                      |
| 2     |       |       |                                   |                 |                   |                      |
| 4     |       |       |                                   |                 |                   |                      |
| >8    |       |       |                                   |                 |                   |                      |
| >8    |       |       | Pos                               | CTX-M, SHV      | Neg               | Pos/Neg              |
| >8    |       |       |                                   |                 |                   |                      |
| >8    |       |       |                                   |                 |                   |                      |
| >8    |       |       |                                   |                 |                   |                      |
| >8    |       |       |                                   |                 |                   |                      |
| 4     |       |       |                                   |                 |                   |                      |
| 2     |       |       |                                   |                 |                   |                      |
| >8    |       |       |                                   |                 |                   |                      |
| >8    |       |       |                                   |                 |                   |                      |
| 2     |       |       |                                   |                 |                   |                      |
| >8    |       |       |                                   |                 |                   |                      |
| >8    |       |       |                                   |                 |                   |                      |

|     |     |       |          |         |
|-----|-----|-------|----------|---------|
| >8  | Neg | SHV   | CMY, DHA | Pos/Pos |
| >8  |     |       |          |         |
| 4   |     |       |          |         |
| >8  |     |       |          |         |
| <=1 |     |       |          |         |
| 2   |     |       |          |         |
| >8  |     |       |          |         |
| 2   |     |       |          |         |
| >8  |     |       |          |         |
| >8  |     |       |          |         |
| >8  |     |       |          |         |
| >8  |     |       |          |         |
| >8  |     |       |          |         |
| 2   |     |       |          |         |
| >8  |     |       |          |         |
| >8  |     |       |          |         |
| >8  |     |       |          |         |
| 2   |     |       |          |         |
| >8  |     |       |          |         |
| >8  |     |       |          |         |
| >8  |     |       |          |         |
| 2   |     |       |          |         |
| >8  |     |       |          |         |
| <=1 |     |       |          |         |
| 2   |     |       |          |         |
| >8  |     |       |          |         |
| >8  |     |       |          |         |
| >8  |     |       |          |         |
| >8  | Neg | Neg   | CMY      | Neg/Pos |
| <=1 |     |       |          |         |
| >8  |     |       |          |         |
| <=1 |     |       |          |         |
| >8  |     |       |          |         |
| >8  |     |       |          |         |
| 2   |     |       |          |         |
| >8  |     |       |          |         |
| 2   |     |       |          |         |
| 2   |     |       |          |         |
| 2   |     |       |          |         |
| >8  |     |       |          |         |
| >8  |     |       |          |         |
| 8   |     |       |          |         |
| >8  |     |       |          |         |
| >8  |     |       |          |         |
| >8  |     |       |          |         |
| >8  |     |       |          |         |
| <=1 |     |       |          |         |
| 2   |     |       |          |         |
| >8  |     |       |          |         |
| >8  |     |       |          |         |
| 4   | Pos | CTX-M | Neg      | Pos/Neg |
| >8  |     |       |          |         |
| >8  |     |       |          |         |
| >8  |     |       |          |         |
| >8  |     |       |          |         |
| >8  |     |       |          |         |
| 2   |     |       |          |         |
| 2   |     |       |          |         |
| 2   |     |       |          |         |
| >8  |     |       |          |         |
| 2   | Neg | Neg   | CMY      | Neg/Pos |
| 2   |     |       |          |         |







4  
>8  
>8  
>8  
<=1  
>8  
2  
>8  
>8  
>8  
>8  
>8  
2  
4  
>8  
>8  
4  
>8  
>8  
4  
>8  
>8  
2  
>8  
2  
<=1  
2  
>8  
>8  
>8  
2  
2  
2  
>8  
>8  
>8  
4  
>8  
4  
2  
>8  
2  
>8  
>8  
>8  
>8  
>8  
4  
>8  
>8  
2  
>8  
>8  
2  
2  
2  
>8

Neg Neg CMY Neg/Pos

Pos SHV Neg Pos/Neg

Pos CTX-M Neg Pos/Neg  
Pos CTX-M Neg Pos/Neg  
Pos CTX-M Neg Pos/Neg



>8  
>8  
>8  
>8  
>8  
>8  
>8  
>8  
2  
>8  
>8  
>8  
>8  
2  
>8  
>8  
>8  
>8  
2  
>8  
>8  
>8  
2  
>8  
4  
>8  
2  
>8  
>8  
>8  
2  
>8  
<=1  
>8  
>8  
>8  
>8  
4  
4  
4  
>8  
>8  
>8  
4  
>8  
>8  
>8  
>8  
>8  
>8  
>8  
<=1  
>8  
>8  
<=1  
4  
8  
>8  
>8

Pos CTX-M Neg Pos/Neg

Pos CTX-M Neg Pos/Neg



|     |     |       |     |         |
|-----|-----|-------|-----|---------|
| >8  |     |       |     |         |
| 2   | Neg | Neg   | CMY | Neg/Pos |
| >8  |     |       |     |         |
| >8  |     |       |     |         |
| >8  | Neg | Neg   | CMY | Neg/Pos |
| 2   |     |       |     |         |
| >8  |     |       |     |         |
| >8  |     |       |     |         |
| >8  |     |       |     |         |
| >8  |     |       |     |         |
| <=1 |     |       |     |         |
| 4   |     |       |     |         |
| 4   |     |       |     |         |
| 2   |     |       |     |         |
| >8  |     |       |     |         |
| >8  |     |       |     |         |
| 2   |     |       |     |         |
| >8  |     |       |     |         |
| 2   |     |       |     |         |
| >8  | Pos | CTX-M | Neg | Pos/Neg |
| >8  |     |       |     |         |
| >8  |     |       |     |         |
| >8  | Pos | CTX-M | Neg | Pos/Neg |
| 2   |     |       |     |         |
| 2   |     |       |     |         |
| 2   |     |       |     |         |
| <=1 |     |       |     |         |
| >8  |     |       |     |         |
| 2   |     |       |     |         |
| >8  |     |       |     |         |
| >8  |     |       |     |         |
| >8  |     |       |     |         |
| >8  |     |       |     |         |
| >8  |     |       |     |         |
| 2   | Neg | Neg   | CMY | Neg/Pos |
| >8  |     |       |     |         |
| >8  |     |       |     |         |
| >8  |     |       |     |         |
| >8  |     |       |     |         |
| 4   |     |       |     |         |
| >8  |     |       |     |         |
| >8  |     |       |     |         |
| >8  |     |       |     |         |
| 4   |     |       |     |         |
| >8  |     |       |     |         |
| >8  |     |       |     |         |
| >8  |     |       |     |         |
| 2   |     |       |     |         |
| >8  |     |       |     |         |
| >8  |     |       |     |         |
| >8  |     |       |     |         |
| >8  |     |       |     |         |
| >8  |     |       |     |         |
| >8  |     |       |     |         |
| >8  |     |       |     |         |
| >8  |     |       |     |         |
| 2   |     |       |     |         |
| >8  |     |       |     |         |
| 2   |     |       |     |         |
| >8  |     |       |     |         |
| >8  |     |       |     |         |

4  
>8  
>8  
>8  
>8  
>8  
>8  
>8  
>8  
>8  
>8  
2  
4  
>8  
>8  
>8  
>8  
2  
2  
>8  
>8  
<=1  
8  
>8  
>8  
>8  
2  
>8  
2  
2  
>8  
>8  
2  
>8  
4  
>8  
2  
<=1  
2  
>8  
>8  
>8  
>8  
>8  
2  
2  
>8  
>8  
>8  
>8  
>8  
2  
>8  
>8  
>8  
4  
>8  
>8

|     |       |     |         |
|-----|-------|-----|---------|
| Neg | Neg   | CMY | Neg/Pos |
| Pos | CTX-M | Neg | Pos/Neg |
| Neg | Neg   | CMY | Neg/Pos |
| Pos | Neg   | Neg | Neg/Neg |
| Neg | Neg   | Neg | Neg/Neg |



|     |     |       |     |         |
|-----|-----|-------|-----|---------|
| <=1 |     |       |     |         |
| >8  | Pos | CTX-M | CMY | Pos/Pos |
| >8  | Neg | Neg   | CMY | Neg/Pos |
| >8  |     |       |     |         |
| 4   |     |       |     |         |
| >8  |     |       |     |         |
| 2   |     |       |     |         |
| >8  | Neg | Neg   | CMY | Neg/Pos |
| >8  | Pos | CTX-M | Neg | Pos/Neg |
| >8  |     |       |     |         |
| >8  | Pos | CTX-M | Neg | Pos/Neg |
| 2   |     |       |     |         |
| <=1 |     |       |     |         |
| <=1 |     |       |     |         |
| 4   |     |       |     |         |
| <=1 |     |       |     |         |
| >8  |     |       |     |         |
| <=1 |     |       |     |         |
| >8  |     |       |     |         |
| 2   | Pos | SHV   | CMY | Pos/Pos |
| <=1 |     |       |     |         |
| >8  |     |       |     |         |
| 2   |     |       |     |         |
| >8  |     |       |     |         |
| 2   |     |       |     |         |
| >8  |     |       |     |         |
| >8  |     |       |     |         |
| 2   |     |       |     |         |
| 4   |     |       |     |         |
| 2   |     |       |     |         |
| >8  |     |       |     |         |
| 2   |     |       |     |         |
| >8  |     |       |     |         |
| 2   |     |       |     |         |
| >8  |     |       |     |         |
| >8  | Neg | CTX-M | CMY | Pos/Pos |
| >8  |     |       |     |         |
| 2   |     |       |     |         |
| >8  |     |       |     |         |
| <=1 |     |       |     |         |
| >8  |     |       |     |         |
| >8  |     |       |     |         |
| >8  |     |       |     |         |
| <=1 |     |       |     |         |
| 2   |     |       |     |         |
| >8  |     |       |     |         |
| >8  |     |       |     |         |
| <=1 |     |       |     |         |
| 2   |     |       |     |         |
| >8  |     |       |     |         |
| >8  |     |       |     |         |
| 2   |     |       |     |         |
| >8  |     |       |     |         |
| 2   |     |       |     |         |
| >8  |     |       |     |         |
| >8  |     |       |     |         |
| <=1 |     |       |     |         |
| >8  |     |       |     |         |
| 2   |     |       |     |         |
| 4   |     |       |     |         |
| 4   |     |       |     |         |



>8  
2  
>8  
>8  
4  
>8  
>8  
2  
>8  
>8  
>8  
>8  
4  
<=1  
4  
>8  
2  
>8  
>8  
>8  
>8  
>8  
Pos  
>8  
>8  
Neg  
2  
2  
>8  
>8  
<=1  
4  
>8  
Pos  
>8  
2  
>8  
>8  
>8  
>8  
2  
>8  
4  
2  
2  
<=1  
>8  
2  
<=1  
>8  
2  
>8  
>8  
2  
>8  
>8  
>8  
2  
>8  
>8  
>8  
2  
Neg  
>8  
<=1  
2  
<=1  
<=1

Pos CTX-M Neg Pos/Neg

Neg Neg CMY Neg/Pos

Pos CTX-M Neg Pos/Neg

Neg Neg CMY Neg/Pos

>8  
>8  
2  
>8  
2  
2  
2  
2  
>8  
2  
>8  
<=1  
2  
>8  
>8  
>8  
>8  
>8  
>8  
>8  
2  
>8  
>8  
>8  
4  
>8  
2  
>8  
<=1  
2  
>8  
>8  
>8  
>8  
2  
2  
>8  
<=1  
>8  
>8  
>8  
<=1  
>8  
2  
2  
>8  
>8  
2  
2  
>8  
2  
2  
>8  
<=1  
>8  
2  
>8  
>8  
2  
2  
2  
>8  
2  
<=1

|  |     |       |     |         |
|--|-----|-------|-----|---------|
|  | Neg | Neg   | CMY | Neg/Pos |
|  |     |       |     |         |
|  | Neg | Neg   | CMY | Neg/Pos |
|  |     |       |     |         |
|  | Pos | CTX-M | CMY | Pos/Pos |
|  |     |       |     |         |
|  |     |       |     |         |
|  |     |       |     |         |
|  |     |       |     |         |
|  |     |       |     |         |
|  | Neg | Neg   | CMY | Neg/Pos |
|  |     |       |     |         |
|  | Pos | CTX-M | CMY | Pos/Pos |
|  | Neg | Neg   | CMY | Neg/Pos |



>8  
4  
2  
<=1  
>8  
<=1  
>8  
>8  
2  
2  
>8  
>8  
>8  
>8  
2  
>8  
>8  
<=1  
<=1  
>8  
>8  
<=1  
>8  
>8  
>8  
>8  
2  
2  
>8  
2  
2  
>8  
>8  
<=1  
2  
>8  
<=1  
>8  
4  
>8  
2

Neg Neg CMY Neg/Pos

Neg Neg CMY Neg/Pos  
Neg Neg CMY Neg/Pos

Neg Neg CMY Neg/Pos

Neg Neg CMY Neg/Pos

Neg Neg CMY Neg/Pos







|     |     |     |       |     |         |
|-----|-----|-----|-------|-----|---------|
| >8  |     |     |       |     |         |
| >8  |     |     |       |     |         |
| >8  |     |     |       |     |         |
| >8  |     |     |       |     |         |
| <=1 |     |     |       |     |         |
| >8  |     |     |       |     |         |
| >8  |     |     |       |     |         |
| 2   |     |     |       |     |         |
| >8  |     |     |       |     |         |
| 2   | <=8 |     |       |     |         |
| 2   | <=8 |     |       |     |         |
| 2   |     |     |       |     |         |
| >8  |     |     |       |     |         |
| <=1 |     |     |       |     |         |
| <=1 |     |     |       |     |         |
| >8  |     |     |       |     |         |
| >8  |     |     |       |     |         |
| >8  |     |     |       |     |         |
| >8  |     |     |       |     |         |
| >8  |     | Neg | Neg   | Neg | Neg/Neg |
| 2   |     |     |       |     |         |
| >8  |     | Pos | CTX-M | Neg | Pos/Neg |
| >8  |     |     |       |     |         |
| 2   |     |     |       |     |         |
| 2   |     |     |       |     |         |
| >8  |     | Pos | CTX-M | Neg | Pos/Neg |
| >8  |     |     |       |     |         |
| <=1 |     |     |       |     |         |
| >8  |     |     |       |     |         |
| >8  |     |     |       |     |         |
| >8  |     |     |       |     |         |
| >8  |     |     |       |     |         |
| >8  |     |     |       |     |         |
| >8  |     |     |       |     |         |
| 2   |     |     |       |     |         |
| 2   |     |     |       |     |         |
| >8  |     |     |       |     |         |
| 2   |     |     |       |     |         |
| 2   |     |     |       |     |         |
| >8  |     |     |       |     |         |
| >8  |     |     |       |     |         |
| <=1 |     |     |       |     |         |
| >8  |     |     |       |     |         |
| >8  |     |     |       |     |         |
| >8  |     |     |       |     |         |
| >8  | <=8 |     |       |     |         |
| 2   | <=8 |     |       |     |         |
| 2   | >64 | Neg | Neg   | Neg | Neg/Neg |
| <=1 | <=8 |     |       |     |         |
| 2   | <=8 |     |       |     |         |
| 2   | <=8 |     |       |     |         |
| 4   | <=8 |     |       |     |         |
| 2   | >64 |     |       |     |         |
| <=1 | <=8 |     |       |     |         |
| >8  | <=8 |     |       |     |         |
| >8  | <=8 |     |       |     |         |
| >8  | <=8 |     |       |     |         |
| >8  | <=8 |     |       |     |         |
| >8  | <=8 | Neg | Neg   | CMY | Neg/Pos |
| >8  | <=8 | Neg | Neg   | Neg | Neg/Neg |
| >8  | <=8 | Neg | Neg   | CMY | Neg/Pos |
| <=1 |     |     |       |     |         |



|     |     |     |       |          |         |
|-----|-----|-----|-------|----------|---------|
| >8  |     | Pos | CTX-M | Neg      | Pos/Neg |
| 4   |     | Neg | CTX-M | CMY      | Pos/Pos |
| <=1 |     |     |       |          |         |
| >8  |     | Neg | Neg   | CMY      | Neg/Pos |
| 2   |     | Neg | Neg   | CMY, DHA | Neg/Pos |
| 2   |     |     |       |          |         |
| 2   |     |     |       |          |         |
| >8  |     | Neg | Neg   | CMY      | Neg/Pos |
| >8  |     | Neg | Neg   | Neg      | Neg/Neg |
| 2   |     |     |       |          |         |
| >8  |     | Neg | Neg   | CMY      | Neg/Pos |
| >8  |     |     |       |          |         |
| >8  |     |     |       |          |         |
| >8  |     |     |       |          |         |
| >8  |     |     |       |          |         |
| >8  |     | Pos | CTX-M | CMY      | Pos/Pos |
| >8  |     | Pos | CTX-M | CMY      | Pos/Pos |
| 2   |     | Neg | Neg   | Neg      | Neg/Neg |
| >8  |     |     |       |          |         |
| 2   |     |     |       |          |         |
| <=1 |     |     |       |          |         |
| 2   |     |     |       |          |         |
| >8  |     |     |       |          |         |
| >8  |     | Pos | CTX-M | Neg      | Pos/Neg |
| >8  |     |     |       |          |         |
| <=1 | <=8 |     |       |          |         |
| >8  | <=8 |     |       |          |         |
| >8  | <=8 |     |       |          |         |
| >8  | <=8 | Neg | Neg   | CMY      | Neg/Pos |
| >8  | >64 | Neg | Neg   | CMY      | Neg/Pos |
| >8  | <=8 |     |       |          |         |
| >8  | <=8 |     |       |          |         |
| >8  | <=8 |     |       |          |         |
| 4   | <=8 |     |       |          |         |
| >8  | <=8 |     |       |          |         |
| >8  | <=8 |     |       |          |         |
| 2   | <=8 |     |       |          |         |
| 4   | <=8 |     |       |          |         |
| >8  | <=8 |     |       |          |         |
| <=1 | <=8 |     |       |          |         |
| >8  | 16  | Neg | Neg   | CMY      | Neg/Pos |
| >8  | <=8 |     |       |          |         |
| >8  | <=8 | Neg | Neg   | CMY      | Neg/Pos |
| >8  | 16  | Neg | Neg   | CMY      | Neg/Pos |
| >8  | <=8 |     |       |          |         |
| >8  | <=8 |     |       |          |         |
| 2   | <=8 |     |       |          |         |
| 4   | <=8 |     |       |          |         |
| >8  | <=8 |     |       |          |         |
| 4   | <=8 |     |       |          |         |
| 2   | <=8 |     |       |          |         |
| >8  | <=8 |     |       |          |         |
| >8  | <=8 |     |       |          |         |
| 4   | <=8 |     |       |          |         |
| 2   | <=8 |     |       |          |         |
| 4   | <=8 |     |       |          |         |
| >8  | <=8 |     |       |          |         |
| >8  | 16  |     |       |          |         |
| >8  | <=8 |     |       |          |         |
| >8  | <=8 |     |       |          |         |
| 4   | <=8 |     |       |          |         |

|     |     |     |       |     |         |
|-----|-----|-----|-------|-----|---------|
| >8  | <=8 |     |       |     |         |
| >8  | <=8 |     |       |     |         |
| >8  | >64 | Pos | CTX-M | Neg | Pos/Neg |
| 2   | <=8 |     |       |     |         |
| 4   | <=8 | Neg | Neg   | CMY | Neg/Pos |
| 2   | <=8 |     |       |     |         |
| >8  | <=8 |     |       |     |         |
| 2   | <=8 |     |       |     |         |
| >8  | <=8 |     |       |     |         |
| 4   | <=8 |     |       |     |         |
| 2   | <=8 |     |       |     |         |
| >8  | <=8 |     |       |     |         |
| 2   | <=8 |     |       |     |         |
| <=1 | <=8 |     |       |     |         |
| >8  | <=8 |     |       |     |         |
| 4   | <=8 |     |       |     |         |
| 2   |     |     |       |     |         |
| >8  |     | Neg | Neg   | CMY | Neg/Pos |
| 4   |     |     |       |     |         |
| >8  |     | Neg | Neg   | CMY | Neg/Pos |
| >8  |     |     |       |     |         |
| >8  |     |     |       |     |         |
| >8  |     |     |       |     |         |
| >8  |     |     |       |     |         |
| >8  |     |     |       |     |         |
| >8  |     | Neg | Neg   | CMY | Neg/Pos |
| >8  |     |     |       |     |         |
| 2   |     |     |       |     |         |
| 2   | <=8 |     |       |     |         |
| >8  | <=8 | Neg | Neg   | CMY | Neg/Pos |
| >8  | <=8 |     |       |     |         |
| <=1 | <=8 |     |       |     |         |
| 2   | <=8 |     |       |     |         |
| >8  | 16  |     |       |     |         |
| <=1 | <=8 |     |       |     |         |
| >8  | <=8 |     |       |     |         |
| 2   | <=8 |     |       |     |         |
| <=1 | <=8 |     |       |     |         |
| >8  | >64 | Pos | CTX-M | CMY | Pos/Pos |
| >8  | <=8 |     |       |     |         |
| <=1 | <=8 |     |       |     |         |
| >8  | <=8 |     |       |     |         |
| >8  | <=8 | Pos | CTX-M | Neg | Pos/Neg |
| 2   | <=8 |     |       |     |         |
| >8  | <=8 |     |       |     |         |
| <=1 | <=8 |     |       |     |         |
| 2   | <=8 |     |       |     |         |
| >8  | <=8 |     |       |     |         |
| >8  | <=8 |     |       |     |         |
| >8  | <=8 |     |       |     |         |
| >8  | <=8 |     |       |     |         |
| >8  | <=8 |     |       |     |         |
| >8  | <=8 |     |       |     |         |
| >8  | <=8 | Neg | Neg   | CMY | Neg/Pos |
| >8  | >64 |     |       |     |         |
| <=1 | <=8 |     |       |     |         |
| >8  | <=8 |     |       |     |         |
| >8  | <=8 |     |       |     |         |
| >8  | <=8 |     |       |     |         |
| >8  | <=8 |     |       |     |         |
| 2   | <=8 |     |       |     |         |
| >8  | <=8 |     |       |     |         |

|     |     |     |       |     |         |
|-----|-----|-----|-------|-----|---------|
| >8  | <=8 |     |       |     |         |
| >8  | <=8 |     |       |     |         |
| >8  | <=8 |     |       |     |         |
| >8  | <=8 |     |       |     |         |
| <=1 | <=8 |     |       |     |         |
| >8  | <=8 | Pos | CTX-M | Neg | Pos/Neg |
| >8  | <=8 |     |       |     |         |
| >8  | <=8 |     |       |     |         |
| 2   |     |     |       |     |         |
| <=1 | <=8 |     |       |     |         |
| 4   | <=8 |     |       |     |         |
| >8  | <=8 |     |       |     |         |
| 2   | <=8 |     |       |     |         |
| >8  | <=8 |     |       |     |         |
| <=1 | <=8 |     |       |     |         |
| >8  | <=8 |     |       |     |         |
| >8  | <=8 |     |       |     |         |
| >8  | 64  | Pos | CTX-M | CMY | Pos/Pos |
| >8  | <=8 |     |       |     |         |
| >8  | <=8 |     |       |     |         |
| >8  | <=8 |     |       |     |         |
| <=1 | 32  |     |       |     |         |
| 2   | 64  | Neg | Neg   | CMY | Neg/Pos |
| <=1 | 16  | Neg | Neg   | Neg | Neg/Neg |
| >8  | <=8 |     |       |     |         |
| 4   | <=8 |     |       |     |         |
| <=1 | <=8 |     |       |     |         |
| 2   | <=8 |     |       |     |         |
| >8  | <=8 |     |       |     |         |
| >8  | 64  | Neg | Neg   | Neg | Neg/Neg |
| >8  | >64 |     |       |     |         |
| 2   | <=8 |     |       |     |         |
| >8  | <=8 |     |       |     |         |
| 8   | <=8 |     |       |     |         |
| >8  | <=8 |     |       |     |         |
| >8  | <=8 |     |       |     |         |
| >8  |     |     |       |     |         |
| >8  |     |     |       |     |         |
| >8  |     |     |       |     |         |
| >8  |     |     |       |     |         |
| >8  |     |     |       |     |         |
| 2   |     |     |       |     |         |
| 2   |     |     |       |     |         |
| >8  |     | Neg | Neg   | CMY | Neg/Pos |
| >8  |     | Neg | Neg   | CMY | Neg/Pos |
| 2   |     |     |       |     |         |
| >8  |     |     |       |     |         |
| >8  |     |     |       |     |         |
| 2   |     |     |       |     |         |
| 2   |     |     |       |     |         |
| >8  |     |     |       |     |         |
| >8  |     |     |       |     |         |
| 4   |     |     |       |     |         |
| 2   |     |     |       |     |         |
| >8  |     |     |       |     |         |
| >8  |     |     |       |     |         |
| 2   |     |     |       |     |         |
| 2   |     |     |       |     |         |
| >8  |     |     |       |     |         |
| >8  |     |     |       |     |         |
| <=1 |     |     |       |     |         |

|     |     |     |       |     |         |
|-----|-----|-----|-------|-----|---------|
| >8  |     |     |       |     |         |
| >8  |     |     |       |     |         |
| >8  |     | Pos | CTX-M | Neg | Pos/Neg |
| 4   |     |     |       |     |         |
| 2   |     |     |       |     |         |
| >8  |     |     |       |     |         |
| 2   |     |     |       |     |         |
| 4   |     |     |       |     |         |
| >8  |     |     |       |     |         |
| >8  |     |     |       |     |         |
| >8  |     |     |       |     |         |
| <=1 |     |     |       |     |         |
| >8  |     |     |       |     |         |
| >8  |     |     |       |     |         |
| >8  |     |     |       |     |         |
| >8  | <=8 |     |       |     |         |
| 4   | <=8 | Neg | Neg   | CMY | Neg/Pos |
| >8  | <=8 |     |       |     |         |
| <=1 | 32  | Neg | Neg   | Neg | Neg/Neg |
| <=1 | <=8 |     |       |     |         |
| >8  | <=8 |     |       |     |         |
| >8  | <=8 |     |       |     |         |
| 4   | <=8 |     |       |     |         |
| >8  | <=8 |     |       |     |         |
| >8  | <=8 | Pos | CTX-M | Neg | Pos/Neg |
| 2   | <=8 |     |       |     |         |
| 2   | <=8 |     |       |     |         |
| 2   | <=8 |     |       |     |         |
| >8  | <=8 |     |       |     |         |
| >8  | <=8 |     |       |     |         |
| >8  | <=8 |     |       |     |         |
| 2   | <=8 |     |       |     |         |
| 2   | <=8 |     |       |     |         |
| 2   | <=8 |     |       |     |         |
| 2   | <=8 |     |       |     |         |
| 2   | <=8 |     |       |     |         |
| 2   | <=8 |     |       |     |         |
| 2   | <=8 |     |       |     |         |
| >8  | <=8 | Pos | CTX-M | Neg | Pos/Neg |
| >8  | <=8 |     |       |     |         |
| >8  | <=8 | Pos | CTX-M | Neg | Pos/Neg |
| 2   | <=8 |     |       |     |         |
| >8  | <=8 | Pos | CTX-M | Neg | Pos/Neg |
| >8  | <=8 |     |       |     |         |
| >8  | <=8 |     |       |     |         |
| 2   | <=8 |     |       |     |         |
| 8   | <=8 |     |       |     |         |
| >8  | <=8 | Pos | CTX-M | Neg | Pos/Neg |
| >8  | <=8 | Pos | Neg   | CMY | Neg/Pos |
| >8  | <=8 | Neg | Neg   | CMY | Neg/Pos |
| >8  | <=8 | Pos | CTX-M | Neg | Pos/Neg |
| >8  | 32  | Pos | CTX-M | CMY | Pos/Pos |
| <=1 | <=8 |     |       |     |         |
| 2   | <=8 |     |       |     |         |
| 2   | <=8 |     |       |     |         |
| 2   | <=8 |     |       |     |         |
| 2   | <=8 |     |       |     |         |
| 2   | <=8 |     |       |     |         |
| 2   | <=8 |     |       |     |         |
| <=1 | <=8 |     |       |     |         |
| >8  | <=8 |     |       |     |         |
| 2   | <=8 |     |       |     |         |

|     |     |     |       |     |         |
|-----|-----|-----|-------|-----|---------|
| >8  | <=8 |     |       |     |         |
| >8  | <=8 |     |       |     |         |
| 2   | <=8 |     |       |     |         |
| 2   | <=8 |     |       |     |         |
| 4   | <=8 | Neg | CTX-M | CMY | Pos/Pos |
| >8  | <=8 |     |       |     |         |
| >8  | <=8 |     |       |     |         |
| 2   | <=8 | Neg | Neg   | CMY | Neg/Pos |
| <=1 | <=8 |     |       |     |         |
| 2   | <=8 |     |       |     |         |
| >8  | <=8 |     |       |     |         |
| 2   | <=8 |     |       |     |         |
| >8  | 16  | Neg | Neg   | Neg | Neg/Neg |
| >8  | <=8 |     |       |     |         |
| 2   | <=8 |     |       |     |         |
| 2   | <=8 | Neg | Neg   | CMY | Neg/Pos |
| >8  | <=8 | Pos | CTX-M | Neg | Pos/Neg |
| >8  | <=8 |     |       |     |         |
| >8  | <=8 |     |       |     |         |
| >8  | <=8 |     |       |     |         |
| >8  | <=8 |     |       |     |         |
| 2   | <=8 |     |       |     |         |
| >8  | <=8 | Neg | Neg   | CMY | Neg/Pos |
| 4   | <=8 |     |       |     |         |
| >8  | <=8 |     |       |     |         |
| >8  | <=8 |     |       |     |         |
| 2   | <=8 |     |       |     |         |
| 2   | <=8 |     |       |     |         |
| >8  | 16  |     |       |     |         |
| 2   | <=8 |     |       |     |         |
| 2   | <=8 |     |       |     |         |
| >8  | <=8 |     |       |     |         |
| >8  | <=8 |     |       |     |         |
| >8  | <=8 |     |       |     |         |
| 2   | 32  |     |       |     |         |
| >8  | 16  | Neg | Neg   | CMY | Neg/Pos |
| >8  | <=8 |     |       |     |         |
| 2   | <=8 |     |       |     |         |
| 2   | <=8 |     |       |     |         |
| 2   | <=8 |     |       |     |         |
| >8  | <=8 |     |       |     |         |
| >8  | <=8 |     |       |     |         |
| 2   | <=8 |     |       |     |         |
| >8  | <=8 | Neg | Neg   | CMY | Neg/Pos |
| >8  | <=8 |     |       |     |         |
| >8  | >64 | Neg | Neg   | CMY | Neg/Pos |
| >8  | <=8 |     |       |     |         |
| >8  | 32  | Neg | Neg   | CMY | Neg/Pos |
| >8  | <=8 | Pos | CTX-M | Neg | Pos/Neg |
| >8  | <=8 |     |       |     |         |
| 2   | 16  |     |       |     |         |
| 2   | <=8 |     |       |     |         |
| 2   | <=8 |     |       |     |         |
| >8  | <=8 |     |       |     |         |
| 4   | <=8 |     |       |     |         |
| 2   | <=8 |     |       |     |         |
| >8  | <=8 |     |       |     |         |
| >8  | <=8 |     |       |     |         |
| 2   | <=8 |     |       |     |         |
| >8  | <=8 |     |       |     |         |
| >8  | <=8 |     |       |     |         |
| 2   | <=8 |     |       |     |         |
| >8  | <=8 |     |       |     |         |
| >8  | <=8 |     |       |     |         |



|     |     |     |       |     |         |
|-----|-----|-----|-------|-----|---------|
| 2   | <=8 |     |       |     |         |
| 4   | <=8 |     |       |     |         |
| >8  | <=8 |     |       |     |         |
| >8  | <=8 |     |       |     |         |
| >8  | <=8 |     |       |     |         |
| >8  | <=8 |     |       |     |         |
| >8  | <=8 |     |       |     |         |
| >8  | <=8 |     |       |     |         |
| >8  | <=8 |     |       |     |         |
| >8  | <=8 |     |       |     |         |
| 4   | <=8 |     |       |     |         |
| >8  | <=8 | Pos | CTX-M | Neg | Pos/Neg |
| >8  | <=8 |     |       |     |         |
| 4   | <=8 |     |       |     |         |
| >8  | <=8 |     |       |     |         |
| >8  | <=8 |     |       |     |         |
| >8  | <=8 |     |       |     |         |
| >8  | <=8 |     |       |     |         |
| 2   | <=8 |     |       |     |         |
| >8  | <=8 |     |       |     |         |
| <=1 | <=8 |     |       |     |         |
| 2   | <=8 |     |       |     |         |
| >8  | 16  | Pos | CTX-M | Neg | Pos/Neg |
| 2   | <=8 |     |       |     |         |
| 2   | <=8 |     |       |     |         |
| >8  | <=8 |     |       |     |         |
| 2   | <=8 |     |       |     |         |
| 2   | <=8 |     |       |     |         |
| >8  | <=8 |     |       |     |         |
| <=1 | <=8 |     |       |     |         |
| >8  | <=8 |     |       |     |         |
| >8  | <=8 |     |       |     |         |
| >8  | <=8 |     |       |     |         |
| >8  | <=8 | Neg | Neg   | CMY | Neg/Pos |
| >8  | <=8 |     |       |     |         |
| >8  | <=8 |     |       |     |         |
| >8  | <=8 |     |       |     |         |
| >8  | <=8 | Neg | SHV   | Neg | Pos/Neg |
| 2   | <=8 |     |       |     |         |
| >8  | <=8 |     |       |     |         |
| >8  | <=8 |     |       |     |         |
| >8  | <=8 |     |       |     |         |
| >8  | <=8 |     |       |     |         |
| 2   | 64  | Neg | Neg   | CMY | Neg/Pos |
| 2   | <=8 |     |       |     |         |
| >8  | <=8 | Neg | Neg   | Neg | Neg/Neg |
| >8  | <=8 |     |       |     |         |
| >8  | <=8 | Neg | Neg   | CMY | Neg/Pos |
| >8  | <=8 |     |       |     |         |
| 2   | <=8 |     |       |     |         |
| 4   | 16  | Pos | CTX-M | Neg | Pos/Neg |
| >8  | <=8 |     |       |     |         |
| >8  | <=8 |     |       |     |         |
| 2   | <=8 |     |       |     |         |
| 4   | <=8 |     |       |     |         |
| >8  | <=8 |     |       |     |         |
| 2   | <=8 |     |       |     |         |
| >8  | <=8 |     |       |     |         |
| <=1 | <=8 |     |       |     |         |
| >8  | <=8 |     |       |     |         |

|     |     |     |       |     |         |
|-----|-----|-----|-------|-----|---------|
| <=1 | <=8 |     |       |     |         |
| >8  | <=8 |     |       |     |         |
| >8  | 32  | Neg | Neg   | CMY | Neg/Pos |
| >8  | <=8 |     |       |     |         |
| 2   | <=8 |     |       |     |         |
| >8  | <=8 | Neg | Neg   | DHA | Neg/Pos |
| 2   | <=8 |     |       |     |         |
| 2   | <=8 |     |       |     |         |
| >8  | <=8 |     |       |     |         |
| >8  | <=8 |     |       |     |         |
| >8  | <=8 |     |       |     |         |
| >8  | <=8 |     |       |     |         |
| >8  | <=8 | Neg | Neg   | Neg | Neg/Neg |
| >8  | >64 | Neg | Neg   | CMY | Neg/Pos |
| >8  | <=8 |     |       |     |         |
| >8  | 16  | Neg | Neg   | Neg | Neg/Neg |
| 2   | 16  | Neg | Neg   | CMY | Neg/Pos |
| 2   | <=8 |     |       |     |         |
| 2   | <=8 |     |       |     |         |
| >8  | <=8 |     |       |     |         |
| 2   | >64 | Pos | CTX-M | Neg | Pos/Neg |
| <=1 | <=8 | Neg | Neg   | CMY | Neg/Pos |
| >8  | <=8 |     |       |     |         |
| <=1 | <=8 |     |       |     |         |
| 2   | <=8 |     |       |     |         |
| >8  | <=8 |     |       |     |         |
| 4   | <=8 |     |       |     |         |
| >8  | <=8 |     |       |     |         |
| 2   | <=8 |     |       |     |         |
| >8  | <=8 |     |       |     |         |
| >8  | <=8 |     |       |     |         |
| 2   | <=8 |     |       |     |         |
| >8  | <=8 |     |       |     |         |
| >8  | <=8 |     |       |     |         |
| >8  | <=8 |     |       |     |         |
| 4   | <=8 | Pos | CTX-M | Neg | Pos/Neg |
| >8  | <=8 |     |       |     |         |
| >8  | <=8 |     |       |     |         |
| >8  | <=8 |     |       |     |         |
| 2   | <=8 |     |       |     |         |
| 2   | <=8 |     |       |     |         |
| >8  | <=8 |     |       |     |         |
| >8  | <=8 |     |       |     |         |
| >8  | <=8 |     |       |     |         |
| 2   | <=8 |     |       |     |         |
| >8  | <=8 |     |       |     |         |
| >8  | >64 |     |       |     |         |
| >8  | <=8 |     |       |     |         |
| >8  | 32  | Neg | Neg   | CMY | Neg/Pos |
| 4   | <=8 |     |       |     |         |
| >8  | <=8 |     |       |     |         |
| 2   | <=8 |     |       |     |         |
| >8  | <=8 |     |       |     |         |
| >8  | <=8 |     |       |     |         |
| >8  | <=8 |     |       |     |         |
| 2   | <=8 |     |       |     |         |
| >8  | <=8 |     |       |     |         |
| 2   | <=8 |     |       |     |         |
| >8  | <=8 |     |       |     |         |
| 2   | <=8 |     |       |     |         |
| >8  | <=8 | Neg | Neg   | Neg | Neg/Neg |





|     |     |     |       |          |         |
|-----|-----|-----|-------|----------|---------|
| >8  | <=8 | Pos | CTX-M | Neg      | Pos/Neg |
| 2   | >64 | Neg | Neg   | CMY      | Neg/Pos |
| >8  | <=8 |     |       |          |         |
| >8  | <=8 |     |       |          |         |
| >8  | <=8 |     |       |          |         |
| 2   | <=8 |     |       |          |         |
| >8  | <=8 |     |       |          |         |
| 2   | <=8 |     |       |          |         |
| >8  | <=8 |     |       |          |         |
| 2   | <=8 |     |       |          |         |
| 2   | <=8 |     |       |          |         |
| >8  | <=8 |     |       |          |         |
| >8  | <=8 | Pos | CTX-M | Neg      | Pos/Neg |
| 2   | <=8 | Neg | Neg   | Neg      | Neg/Neg |
| 2   | <=8 |     |       |          |         |
| >8  | <=8 |     |       |          |         |
| <=1 | <=8 |     |       |          |         |
| 2   | <=8 |     |       |          |         |
| >8  | <=8 |     |       |          |         |
| >8  | <=8 |     |       |          |         |
| 2   | <=8 |     |       |          |         |
| >8  | <=8 | Neg | Neg   | CMY      | Neg/Pos |
| 2   | <=8 |     |       |          |         |
| >8  | 16  | Neg | Neg   | CMY      | Neg/Pos |
| >8  | <=8 |     |       |          |         |
| >8  | <=8 |     |       |          |         |
| 2   | <=8 |     |       |          |         |
| >8  | <=8 |     |       |          |         |
| 2   | <=8 |     |       |          |         |
| 2   | <=8 |     |       |          |         |
| 2   | <=8 |     |       |          |         |
| >8  | <=8 |     |       |          |         |
| 4   | 32  | Neg | CTX-M | CMY, DHA | Pos/Pos |
| 4   | <=8 |     |       |          |         |
| 8   | <=8 | Neg | CTX-M | CMY      | Pos/Pos |
| >8  | <=8 |     |       |          |         |
| 2   | <=8 |     |       |          |         |
| 4   | <=8 | Neg | Neg   | CMY, DHA | Neg/Pos |
| >8  | <=8 |     |       |          |         |
| 2   | <=8 |     |       |          |         |
| 2   | <=8 |     |       |          |         |
| 2   | <=8 |     |       |          |         |
| >8  | <=8 |     |       |          |         |
| >8  | <=8 |     |       |          |         |
| >8  | <=8 |     |       |          |         |
| >8  | <=8 |     |       |          |         |
| <=1 | <=8 |     |       |          |         |
| >8  | <=8 |     |       |          |         |
| <=1 | <=8 |     |       |          |         |
| >8  | <=8 |     |       |          |         |
| >8  | <=8 | Pos | CTX-M | Neg      | Pos/Neg |
| 4   | 32  |     |       |          |         |
| <=1 | <=8 |     |       |          |         |
| >8  | <=8 | Neg | Neg   | DHA      | Neg/Pos |
| >8  | <=8 | Neg | Neg   | CMY      | Neg/Pos |
| 2   | <=8 |     |       |          |         |
| <=1 | <=8 |     |       |          |         |
| >8  | <=8 |     |       |          |         |
| >8  | <=8 |     |       |          |         |
| 4   | <=8 |     |       |          |         |

|     |     |     |       |     |         |
|-----|-----|-----|-------|-----|---------|
| 2   | <=8 |     |       |     |         |
| >8  | <=8 |     |       |     |         |
| >8  | <=8 |     |       |     |         |
| 2   | <=8 |     |       |     |         |
| <=1 | <=8 |     |       |     |         |
| <=1 | <=8 |     |       |     |         |
| >8  | <=8 |     |       |     |         |
| >8  | <=8 |     |       |     |         |
| >8  | <=8 |     |       |     |         |
| >8  | <=8 | Neg | Neg   | CMY | Neg/Pos |
| >8  | <=8 | Pos | CTX-M | Neg | Pos/Neg |
| 2   | <=8 |     |       |     |         |
| 2   | <=8 |     |       |     |         |
| 2   | <=8 |     |       |     |         |
| >8  | <=8 |     |       |     |         |
| >8  | <=8 | Neg | Neg   | Neg | Neg/Neg |
| <=1 | <=8 |     |       |     |         |
| 2   | <=8 |     |       |     |         |
| 2   | 32  |     |       |     |         |
| >8  | <=8 |     |       |     |         |
| 2   | <=8 |     |       |     |         |
| >8  | <=8 |     |       |     |         |
| 2   | <=8 |     |       |     |         |
| >8  | <=8 |     |       |     |         |
| 2   | <=8 |     |       |     |         |
| 2   | <=8 |     |       |     |         |
| >8  | <=8 | Neg | Neg   | CMY | Neg/Pos |
| 8   | <=8 |     |       |     |         |
| >8  | <=8 | Pos | CTX-M | Neg | Pos/Neg |
| >8  | <=8 |     |       |     |         |
| >8  | <=8 |     |       |     |         |
| >8  | <=8 | Neg | Neg   | CMY | Neg/Pos |
| <=1 | <=8 |     |       |     |         |
| >8  | <=8 |     |       |     |         |
| <=1 | <=8 |     |       |     |         |
| 2   | <=8 |     |       |     |         |
| >8  | <=8 |     |       |     |         |
| >8  | <=8 | Neg | Neg   | CMY | Neg/Pos |
| 2   | <=8 |     |       |     |         |
| >8  | <=8 |     |       |     |         |
| 2   | <=8 |     |       |     |         |
| 4   | 32  | Neg | Neg   | CMY | Neg/Pos |
| 2   | <=8 |     |       |     |         |
| >8  | <=8 | Neg | Neg   | DHA | Neg/Pos |
| 2   | <=8 |     |       |     |         |
| >8  | <=8 |     |       |     |         |
| >8  | 16  |     |       |     |         |
| >8  | <=8 |     |       |     |         |
| >8  | <=8 |     |       |     |         |
| >8  | <=8 |     |       |     |         |
| 2   | <=8 |     |       |     |         |
| 2   | <=8 |     |       |     |         |
| 2   | <=8 |     |       |     |         |
| 2   | <=8 |     |       |     |         |
| 2   | <=8 |     |       |     |         |
| 2   | <=8 |     |       |     |         |
| >8  | <=8 |     |       |     |         |
| >8  | <=8 |     |       |     |         |
| >8  | <=8 |     |       |     |         |
| 2   | <=8 |     |       |     |         |
| 2   | <=8 |     |       |     |         |
| >8  | <=8 |     |       |     |         |

|     |     |     |       |     |         |
|-----|-----|-----|-------|-----|---------|
| 4   | <=8 | Pos | CTX-M | Neg | Pos/Neg |
| 2   | <=8 |     |       |     |         |
| >8  | <=8 |     |       |     |         |
| <=1 | <=8 |     |       |     |         |
| >8  | <=8 |     |       |     |         |
| >8  | <=8 |     |       |     |         |
| <=1 | <=8 |     |       |     |         |
| 2   | <=8 |     |       |     |         |
| 2   | <=8 |     |       |     |         |
| 4   | <=8 |     |       |     |         |
| 2   | <=8 |     |       |     |         |
| >8  | <=8 |     |       |     |         |
| >8  | <=8 |     |       |     |         |
| >8  | <=8 |     |       |     |         |
| >8  | <=8 |     |       |     |         |
| 2   | <=8 |     |       |     |         |
| >8  | 64  | Neg | Neg   | CMY | Neg/Pos |
| >8  | <=8 |     |       |     |         |
| >8  | <=8 | Neg | Neg   | CMY | Neg/Pos |
| >8  | <=8 |     |       |     |         |
| 2   | <=8 |     |       |     |         |
| >8  | <=8 |     |       |     |         |
| >8  | <=8 |     |       |     |         |
| >8  | <=8 |     |       |     |         |
| 2   | <=8 |     |       |     |         |
| 2   | <=8 |     |       |     |         |
| 2   | <=8 |     |       |     |         |
| <=1 | <=8 |     |       |     |         |
| >8  | <=8 |     |       |     |         |
| >8  | <=8 |     |       |     |         |
| 2   | <=8 |     |       |     |         |
| 2   | <=8 |     |       |     |         |
| >8  | <=8 |     |       |     |         |
| >8  | <=8 | Neg | Neg   | CMY | Neg/Pos |
| >8  | <=8 |     |       |     |         |
| >8  | <=8 |     |       |     |         |
| 4   | <=8 |     |       |     |         |
| 2   | <=8 |     |       |     |         |
| >8  | <=8 | Neg | Neg   | CMY | Neg/Pos |
| 2   | <=8 |     |       |     |         |
| >8  | <=8 |     |       |     |         |
| 2   | <=8 |     |       |     |         |
| >8  | <=8 |     |       |     |         |
| >8  | <=8 |     |       |     |         |
| 2   | <=8 |     |       |     |         |
| 2   | 16  |     |       |     |         |
| 2   | <=8 |     |       |     |         |
| >8  | <=8 |     |       |     |         |
| 4   | <=8 |     |       |     |         |
| 2   | <=8 |     |       |     |         |
| 2   | <=8 |     |       |     |         |
| 4   | <=8 |     |       |     |         |
| >8  | <=8 |     |       |     |         |
| 2   | <=8 |     |       |     |         |
| >8  | <=8 |     |       |     |         |
| 2   | <=8 |     |       |     |         |
| 2   | <=8 |     |       |     |         |
| >8  | <=8 |     |       |     |         |
| >8  | <=8 |     |       |     |         |
| 2   | <=8 |     |       |     |         |
| >8  | <=8 |     |       |     |         |
| 2   | <=8 |     |       |     |         |
| >8  | <=8 | Pos | Neg   | CMY | Neg/Pos |

|     |     |     |            |     |         |
|-----|-----|-----|------------|-----|---------|
| >8  | <=8 |     |            |     |         |
| >8  | <=8 |     |            |     |         |
| >8  | <=8 |     |            |     |         |
| 2   | <=8 |     |            |     |         |
| 2   | <=8 |     |            |     |         |
| <=1 | <=8 | Neg | Neg        | CMY | Neg/Pos |
| 2   | <=8 |     |            |     |         |
| >8  | <=8 |     |            |     |         |
| >8  | <=8 | Pos | CTX-M      | Neg | Pos/Neg |
| >8  | <=8 | Neg | Neg        | CMY | Neg/Pos |
| >8  | <=8 |     |            |     |         |
| >8  | >64 |     |            |     |         |
| >8  | <=8 |     |            |     |         |
| 4   | <=8 | Neg | Neg        | CMY | Neg/Pos |
| >8  | <=8 | Neg | CTX-M      | CMY | Pos/Pos |
| 8   | >64 | Pos | CTX-M, SHV | Neg | Pos/Neg |
| <=1 | <=8 |     |            |     |         |
| 2   | <=8 |     |            |     |         |
| 4   | 16  | Pos | CTX-M      | Neg | Pos/Neg |
| 4   | <=8 |     |            |     |         |
| 4   | <=8 |     |            |     |         |
| 2   | <=8 |     |            |     |         |
| >8  | <=8 |     |            |     |         |
| 4   | <=8 | Neg | Neg        | CMY | Neg/Pos |
| 4   | 32  | Neg | Neg        | DHA | Neg/Pos |
| >8  | <=8 |     |            |     |         |
| >8  | <=8 |     |            |     |         |
| 2   | <=8 |     |            |     |         |
| 2   | <=8 |     |            |     |         |
| 4   | <=8 |     |            |     |         |
| >8  | <=8 |     |            |     |         |
| >8  | >64 |     |            |     |         |
| >8  | <=8 |     |            |     |         |
| >8  | 64  | Neg | CTX-M      | CMY | Pos/Pos |
| 4   | <=8 |     |            |     |         |
| 2   | <=8 |     |            |     |         |
| >8  | <=8 |     |            |     |         |
| 4   | <=8 |     |            |     |         |
| >8  | <=8 |     |            |     |         |
| >8  | <=8 |     |            |     |         |
| >8  | <=8 |     |            |     |         |
| 2   | <=8 |     |            |     |         |
| 2   | <=8 |     |            |     |         |
| >8  | <=8 |     |            |     |         |
| 2   | <=8 |     |            |     |         |
| 2   | <=8 |     |            |     |         |
| 2   | <=8 |     |            |     |         |
| 2   | <=8 |     |            |     |         |
| 2   | <=8 |     |            |     |         |
| 2   | <=8 |     |            |     |         |
| 2   | <=8 |     |            |     |         |
| 2   | <=8 |     |            |     |         |
| 4   | <=8 |     |            |     |         |
| >8  | <=8 |     |            |     |         |
| >8  | <=8 |     |            |     |         |
| >8  | 32  | Neg | Neg        | CMY | Neg/Pos |
| <=1 | <=8 |     |            |     |         |
| >8  | <=8 |     |            |     |         |
| 4   | <=8 |     |            |     |         |
| >8  | <=8 |     |            |     |         |
| 2   | <=8 |     |            |     |         |
| >8  | <=8 |     |            |     |         |
| >8  | <=8 | Pos | SHV        | Neg | Pos/Neg |



|        |     |     |       |     |         |
|--------|-----|-----|-------|-----|---------|
| <=0.12 | <=4 | Neg | Neg   | CMY | Neg/Pos |
| <=0.25 | <=4 |     |       |     |         |
| <=0.25 | <=4 |     |       |     |         |
| <=0.25 | <=4 | Pos | CTX-M | Neg | Pos/Neg |
| <=0.25 | <=4 |     |       |     |         |
| <=0.25 | <=4 |     |       |     |         |
| <=0.25 | <=4 |     |       |     |         |
| 0.25   | 64  | Neg | Neg   | CMY | Neg/Pos |
| <=0.12 | <=4 |     |       |     |         |
| <=0.12 | <=4 |     |       |     |         |
| <=0.12 | <=4 |     |       |     |         |
| <=0.12 | <=4 |     |       |     |         |
| <=0.12 | <=4 |     |       |     |         |
| <=0.25 | <=4 | Neg | Neg   | CMY | Neg/Pos |
| <=0.25 | <=4 |     |       |     |         |
| <=0.25 | <=4 |     |       |     |         |
| <=0.25 | <=4 | Neg | Neg   | CMY | Neg/Pos |
| <=0.25 | <=4 |     |       |     |         |
| <=0.25 | <=4 | Pos | CTX-M | Neg | Pos/Neg |
| <=0.25 | <=4 |     |       |     |         |
| <=0.25 | <=4 |     |       |     |         |
| <=0.25 | <=4 | Neg | Neg   | CMY | Neg/Pos |
| <=0.25 | <=4 | Neg | Neg   | CMY | Neg/Pos |
| <=0.25 | <=4 |     |       |     |         |
| <=0.25 | <=4 |     |       |     |         |
| <=0.25 | <=4 |     |       |     |         |
| <=0.25 | <=4 |     |       |     |         |
| <=0.25 | >64 | Neg | Neg   | CMY | Neg/Pos |
| <=0.12 | <=4 |     |       |     |         |
| <=0.12 | <=4 |     |       |     |         |
| <=0.12 | <=4 |     |       |     |         |
| 0.5    | <=4 |     |       |     |         |
| <=0.25 | <=4 |     |       |     |         |
| <=0.25 | <=4 |     |       |     |         |
| <=0.12 | <=4 | Neg | Neg   | Neg | Neg/Neg |
| <=0.12 | <=4 |     |       |     |         |
| <=0.12 | <=4 |     |       |     |         |
| <=0.12 | 8   |     |       |     |         |
| <=0.12 | <=4 |     |       |     |         |
| <=0.12 | <=4 |     |       |     |         |
| <=0.25 | <=4 |     |       |     |         |
| <=0.12 | <=4 |     |       |     |         |
| <=0.12 | <=4 |     |       |     |         |
| <=0.12 | <=4 |     |       |     |         |
| <=0.12 | <=4 |     |       |     |         |
| <=0.12 | <=4 |     |       |     |         |
| <=0.12 | <=4 |     |       |     |         |
| <=0.12 | <=4 |     |       |     |         |
| <=0.25 | <=4 |     |       |     |         |
| <=0.25 | <=4 | Pos | CTX-M | Neg | Pos/Neg |
| <=0.25 | <=4 |     |       |     |         |
| <=0.25 | <=4 |     |       |     |         |
| <=0.25 | <=4 |     |       |     |         |
| <=0.25 | <=4 |     |       |     |         |
| <=0.25 | <=4 |     |       |     |         |
| <=0.12 | <=4 |     |       |     |         |
| <=0.25 | <=4 |     |       |     |         |
| <=0.25 | <=4 |     |       |     |         |
| <=0.12 | <=4 | Pos | CTX-M | Neg | Pos/Neg |
| <=0.12 | <=4 |     |       |     |         |
| <=0.12 | <=4 |     |       |     |         |
| 0.25   | <=4 |     |       |     |         |

|        |     |     |       |     |         |
|--------|-----|-----|-------|-----|---------|
| <=0.25 | <=4 |     |       |     |         |
| <=0.25 | <=4 |     |       |     |         |
| <=0.25 | 32  | Pos | CTX-M | CMY | Pos/Pos |
| <=0.25 | 16  | Pos | CTX-M | CMY | Pos/Pos |
| <=0.25 | <=4 |     |       |     |         |
| <=0.25 | <=4 |     |       |     |         |
| <=0.25 | <=4 |     |       |     |         |
| <=0.12 | <=4 |     |       |     |         |
| 0.25   | 8   | Neg | Neg   | CMY | Neg/Pos |
| <=0.25 | <=4 |     |       |     |         |
| <=0.25 | <=4 |     |       |     |         |
| <=0.25 | <=4 |     |       |     |         |
| <=0.25 | <=4 |     |       |     |         |
| <=0.25 | <=4 |     |       |     |         |
| <=0.12 | 16  | Pos | CTX-M | CMY | Pos/Pos |
| <=0.25 | <=4 | Neg | Neg   | CMY | Neg/Pos |
| <=0.25 | <=4 |     |       |     |         |
| <=0.25 | <=4 |     |       |     |         |
| <=0.12 | 8   | Pos | CTX-M | Neg | Pos/Neg |
| <=0.25 | <=4 | Neg | Neg   | CMY | Neg/Pos |
| <=0.25 | <=4 |     |       |     |         |
| <=0.25 | <=4 |     |       |     |         |
| <=0.25 | <=4 |     |       |     |         |
| <=0.25 | <=4 |     |       |     |         |
| <=0.12 | <=4 |     |       |     |         |
| <=0.12 | 32  | Neg | CTX-M | CMY | Pos/Pos |
| <=0.12 | <=4 |     |       |     |         |
| <=0.25 | 32  | Neg | Neg   | CMY | Neg/Pos |
| <=0.25 | <=4 |     |       |     |         |
| <=0.25 | <=4 | Neg | Neg   | CMY | Neg/Pos |
| <=0.25 | <=4 |     |       |     |         |
| <=0.25 | <=4 |     |       |     |         |
| <=0.25 | <=4 |     |       |     |         |
| <=0.25 | <=4 |     |       |     |         |
| <=0.25 | <=4 | Pos | CTX-M | Neg | Pos/Neg |
| <=0.25 | <=4 | Neg | Neg   | CMY | Neg/Pos |
| <=0.25 | <=4 |     |       |     |         |
| 0.5    | <=4 | Neg | Neg   | Neg | Neg/Neg |
| <=0.25 | <=4 |     |       |     |         |
| <=0.25 | <=4 |     |       |     |         |
| <=0.25 | <=4 |     |       |     |         |
| <=0.25 | <=4 | Neg | Neg   | CMY | Neg/Pos |
| <=0.25 | <=4 |     |       |     |         |
| <=0.25 | <=4 |     |       |     |         |
| <=0.25 | <=4 |     |       |     |         |
| <=0.25 | 8   | Pos | CTX-M | CMY | Pos/Pos |
| <=0.25 | <=4 |     |       |     |         |
| <=0.25 | <=4 |     |       |     |         |
| <=0.12 | <=4 |     |       |     |         |
| <=0.12 | <=4 |     |       |     |         |
| <=0.12 | <=4 |     |       |     |         |
| <=0.12 | <=4 |     |       |     |         |
| <=0.12 | <=4 |     |       |     |         |
| 0.25   | <=4 | Pos | CTX-M | CMY | Pos/Pos |
| <=0.25 | 8   | Pos | CTX-M | Neg | Pos/Neg |
| <=0.12 | 16  |     |       |     |         |
| <=0.12 | <=4 |     |       |     |         |
| <=0.12 | <=4 |     |       |     |         |
| <=0.25 | <=4 | Pos | CTX-M | Neg | Pos/Neg |
| <=0.12 | 16  |     |       |     |         |



|        |     |     |       |     |         |
|--------|-----|-----|-------|-----|---------|
| <=0.25 | <=4 | Pos | CTX-M | Neg | Pos/Neg |
| <=0.25 | 8   | Neg | Neg   | CMY | Neg/Pos |
| <=0.25 | <=4 | Neg | Neg   | CMY | Neg/Pos |
| <=0.12 | <=4 |     |       |     |         |
| 0.25   | <=4 |     |       |     |         |
| <=0.12 | <=4 |     |       |     |         |
| <=0.12 | 8   | Neg | Neg   | CMY | Neg/Pos |
| <=0.12 | 64  | Neg | Neg   | CMY | Neg/Pos |
| <=0.12 | <=4 | Neg | Neg   | CMY | Neg/Pos |
| <=0.12 | <=4 |     |       |     |         |
| <=0.12 | <=4 | Neg | Neg   | CMY | Neg/Pos |
| 0.25   | <=4 |     |       |     |         |
| <=0.12 | <=4 |     |       |     |         |
| <=0.12 | 8   | Neg | Neg   | CMY | Neg/Pos |
| <=0.12 | <=4 |     |       |     |         |
| <=0.25 | <=4 |     |       |     |         |
| <=0.25 | <=4 |     |       |     |         |
| <=0.25 | <=4 |     |       |     |         |
| <=0.25 | <=4 |     |       |     |         |
| <=0.25 | <=4 |     |       |     |         |
| <=0.25 | <=4 |     |       |     |         |
| <=0.25 | <=4 |     |       |     |         |
| <=0.12 | <=4 |     |       |     |         |
| <=0.25 | <=4 |     |       |     |         |
| <=0.25 | <=4 |     |       |     |         |
| <=0.25 | <=4 |     |       |     |         |
| <=0.25 | <=4 |     |       |     |         |
| <=0.25 | <=4 |     |       |     |         |
| <=0.25 | <=4 |     |       |     |         |
| <=0.12 | <=4 |     |       |     |         |
| <=0.25 | <=4 |     |       |     |         |
| <=0.25 | <=4 |     |       |     |         |
| <=0.25 | <=4 | Pos | CTX-M | Neg | Pos/Neg |
| <=0.25 | <=4 |     |       |     |         |
| <=0.25 | <=4 |     |       |     |         |
| <=0.25 | <=4 |     |       |     |         |
| <=0.25 | <=4 |     |       |     |         |
| <=0.25 | <=4 |     |       |     |         |
| <=0.12 | <=4 |     |       |     |         |
| <=0.25 | <=4 |     |       |     |         |
| <=0.25 | <=4 |     |       |     |         |
| 0.5    | <=4 | Neg | Neg   | Neg | Neg/Neg |
| <=0.25 | <=4 |     |       |     |         |
| <=0.25 | <=4 |     |       |     |         |
| <=0.25 | <=4 |     |       |     |         |
| <=0.25 | <=4 |     |       |     |         |
| <=0.25 | <=4 | Neg | Neg   | Neg | Neg/Neg |
| <=0.25 | <=4 |     |       |     |         |
| <=0.12 | <=4 |     |       |     |         |
| <=0.12 | <=4 |     |       |     |         |
| <=0.12 | <=4 |     |       |     |         |
| <=0.25 | <=4 |     |       |     |         |
| <=0.25 | <=4 |     |       |     |         |
| <=0.25 | <=4 |     |       |     |         |
| <=0.25 | <=4 |     |       |     |         |
| <=0.25 | <=4 |     |       |     |         |
| <=0.25 | <=4 |     |       |     |         |
| <=0.25 | <=4 |     |       |     |         |
| <=0.25 | <=4 |     |       |     |         |
| <=0.25 | <=4 |     |       |     |         |
| <=0.25 | <=4 |     |       |     |         |
| <=0.25 | >64 | Neg | Neg   | CMY | Neg/Pos |
| <=0.25 | <=4 |     |       |     |         |
| <=0.25 | <=4 |     |       |     |         |
| <=0.25 | <=4 |     |       |     |         |
| <=0.25 | <=4 |     |       |     |         |
| <=0.25 | <=4 |     |       |     |         |
| <=0.25 | <=4 |     |       |     |         |
| <=0.25 | <=4 |     |       |     |         |
| <=0.25 | <=4 |     |       |     |         |
| <=0.25 | 32  | Neg | Neg   | CMY | Neg/Pos |
| <=0.25 | <=4 |     |       |     |         |
| <=0.25 | 16  |     |       |     |         |
| <=0.25 | <=4 | Pos | CTX-M | Neg | Pos/Neg |
| <=0.25 | <=4 |     |       |     |         |
| <=0.12 | <=4 |     |       |     |         |

|        |     |     |       |     |         |
|--------|-----|-----|-------|-----|---------|
| <=0.12 | <=4 | Neg | Neg   | CMY | Neg/Pos |
| <=0.12 | <=4 |     |       |     |         |
| <=0.12 | <=4 |     |       |     |         |
| <=0.12 | <=4 |     |       |     |         |
| <=0.12 | <=4 |     |       |     |         |
| <=0.25 | <=4 |     |       |     |         |
| <=0.25 | <=4 |     |       |     |         |
| <=0.25 | <=4 |     |       |     |         |
| <=0.25 | <=4 |     |       |     |         |
| <=0.25 | <=4 |     |       |     |         |
| <=0.25 | 8   | Neg | Neg   | Neg | Neg/Neg |
| <=0.25 | <=4 |     |       |     |         |
| <=0.25 | <=4 | Pos | CTX-M | Neg | Pos/Neg |
| <=0.25 | <=4 |     |       |     |         |
| <=0.25 | <=4 |     |       |     |         |
| <=0.12 | <=4 |     |       |     |         |
| <=0.25 | 64  | Neg | Neg   | CMY | Neg/Pos |
| <=0.12 | <=4 |     |       |     |         |
| <=0.12 | <=4 | Pos | CTX-M | CMY | Pos/Pos |
| <=0.25 | <=4 |     |       |     |         |
| <=0.12 | <=4 |     |       |     |         |
| <=0.12 | <=4 |     |       |     |         |
| <=0.25 | <=4 |     |       |     |         |
| <=0.25 | 16  | Neg | Neg   | Neg | Neg/Neg |
| <=0.25 | <=4 |     |       |     |         |
| <=0.25 | <=4 |     |       |     |         |
| <=0.12 | <=4 |     |       |     |         |
| <=0.12 | <=4 | Neg | Neg   | DHA | Neg/Pos |
| <=0.12 | <=4 |     |       |     |         |
| <=0.12 | <=4 |     |       |     |         |
| <=0.12 | <=4 |     |       |     |         |
| <=0.12 | <=4 |     |       |     |         |
| <=0.12 | <=4 |     |       |     |         |
| <=0.12 | <=4 |     |       |     |         |
| <=0.12 | <=4 |     |       |     |         |
| <=0.12 | <=4 |     |       |     |         |
| <=0.12 | <=4 |     |       |     |         |
| <=0.12 | <=4 |     |       |     |         |
| <=0.25 | <=4 |     |       |     |         |
| <=0.25 | <=4 |     |       |     |         |
| <=0.25 | <=4 |     |       |     |         |
| <=0.25 | <=4 |     |       |     |         |
| <=0.25 | <=4 |     |       |     |         |
| <=0.25 | <=4 |     |       |     |         |
| <=0.25 | <=4 |     |       |     |         |
| <=0.25 | <=4 |     |       |     |         |
| <=0.25 | <=4 |     |       |     |         |
| <=0.25 | <=4 | Pos | CTX-M | Neg | Pos/Neg |
| 0.25   | <=4 |     |       |     |         |
| <=0.25 | 32  | Neg | Neg   | CMY | Neg/Pos |
| <=0.25 | <=4 |     |       |     |         |
| <=0.25 | <=4 |     |       |     |         |
| <=0.25 | <=4 |     |       |     |         |
| <=0.25 | <=4 | Neg | Neg   | Neg | Neg/Neg |
| <=0.25 | <=4 | Pos | CTX-M | Neg | Pos/Neg |
| <=0.25 | <=4 |     |       |     |         |
| <=0.25 | <=4 | Neg | Neg   | CMY | Neg/Pos |
| <=0.25 | <=4 |     |       |     |         |
| <=0.12 | <=4 |     |       |     |         |
| <=0.25 | 32  | Neg | Neg   | CMY | Neg/Pos |
| <=0.25 | 32  | Pos | CTX-M | CMY | Pos/Pos |
| <=0.25 | <=4 |     |       |     |         |
| <=0.12 | <=4 |     |       |     |         |
| <=0.12 | <=4 | Neg | Neg   | CMY | Neg/Pos |
| <=0.12 | 32  | Pos | CTX-M | CMY | Pos/Pos |
| 0.25   | 64  | Pos | CTX-M | CMY | Pos/Pos |
| <=0.25 | <=4 |     |       |     |         |
| <=0.25 | <=4 |     |       |     |         |
| <=0.25 | <=4 |     |       |     |         |



|        |     |     |       |     |         |
|--------|-----|-----|-------|-----|---------|
| <=0.12 | <=4 |     |       |     |         |
| <=0.12 | <=4 |     |       |     |         |
| <=0.25 | <=4 |     |       |     |         |
| <=0.12 | <=4 |     |       |     |         |
| <=0.12 | <=4 |     |       |     |         |
| <=0.12 | <=4 |     |       |     |         |
| <=0.12 | <=4 |     |       |     |         |
| <=0.12 | <=4 |     |       |     |         |
| <=0.12 | <=4 |     |       |     |         |
| <=0.12 | <=4 |     |       |     |         |
| <=0.12 | <=4 |     |       |     |         |
| <=0.12 | 8   | Neg | Neg   | CMY | Neg/Pos |
| <=0.12 | 8   | Neg | Neg   | CMY | Neg/Pos |
| <=0.12 | <=4 |     |       |     |         |
| <=0.12 | <=4 |     |       |     |         |
| <=0.12 | <=4 |     |       |     |         |
| <=0.12 | <=4 |     |       |     |         |
| <=0.25 | 8   | Neg | Neg   | CMY | Neg/Pos |
| <=0.25 | <=4 |     |       |     |         |
| <=0.25 | <=4 |     |       |     |         |
| <=0.25 | <=4 |     |       |     |         |
| <=0.25 | <=4 |     |       |     |         |
| <=0.25 | 32  | Pos | CTX-M | CMY | Pos/Pos |
| <=0.25 | <=4 |     |       |     |         |
| <=0.25 | <=4 |     |       |     |         |
| <=0.12 | <=4 |     |       |     |         |
| <=0.25 | <=4 |     |       |     |         |
| <=0.12 | <=4 |     |       |     |         |
| 0.25   | 8   |     |       |     |         |
| <=0.25 | <=4 |     |       |     |         |
| <=0.12 | <=4 |     |       |     |         |
| 0.5    | <=4 |     |       |     |         |
| <=0.12 | <=4 | Pos | CTX-M | Neg | Pos/Neg |
| 0.25   | <=4 | Neg | Neg   | CMY | Neg/Pos |
| 0.25   | <=4 |     |       |     |         |
| <=0.12 | <=4 |     |       |     |         |
| <=0.25 | <=4 |     |       |     |         |
| <=0.25 | <=4 |     |       |     |         |
| <=0.25 | 8   |     |       |     |         |
| <=0.25 | <=4 | Neg | Neg   | CMY | Neg/Pos |
| <=0.25 | <=4 | Pos | CTX-M | Neg | Pos/Neg |
| <=0.25 | <=4 |     |       |     |         |
| <=0.25 | 16  | Neg | CTX-M | CMY | Pos/Pos |
| <=0.25 | 8   |     |       |     |         |
| <=0.25 | <=4 |     |       |     |         |
| <=0.25 | <=4 |     |       |     |         |
| <=0.25 | <=4 | Neg | Neg   | CMY | Neg/Pos |
| <=0.25 | <=4 | Neg | Neg   | CMY | Neg/Pos |
| <=0.25 | <=4 |     |       |     |         |
| <=0.25 | <=4 | Neg | Neg   | DHA | Neg/Pos |
| <=0.25 | <=4 |     |       |     |         |
| <=0.25 | <=4 |     |       |     |         |
| <=0.25 | <=4 |     |       |     |         |
| <=0.25 | <=4 |     |       |     |         |
| <=0.25 | <=4 |     |       |     |         |
| <=0.25 | <=4 | Pos | CTX-M | Neg | Pos/Neg |
| <=0.25 | 16  | Pos | CTX-M | CMY | Pos/Pos |
| <=0.25 | <=4 | Neg | Neg   | CMY | Neg/Pos |



|        |     |     |       |          |         |
|--------|-----|-----|-------|----------|---------|
| <=0.25 | <=4 |     |       |          |         |
| <=0.25 | <=4 |     |       |          |         |
| <=0.25 | <=4 |     |       |          |         |
| <=0.25 | <=4 |     |       |          |         |
| <=0.25 | <=4 |     |       |          |         |
| <=0.25 | <=4 |     |       |          |         |
| <=0.25 | <=4 |     |       |          |         |
| <=0.25 | <=4 |     |       |          |         |
| <=0.25 | <=4 |     |       |          |         |
| <=0.25 | <=4 | Neg | Neg   | CMY      | Neg/Pos |
| <=0.25 | <=4 |     |       |          |         |
| <=0.25 | <=4 |     |       |          |         |
| <=0.12 | <=4 |     |       |          |         |
| <=0.12 | <=4 |     |       |          |         |
| <=0.12 | 8   | Neg | Neg   | CMY      | Neg/Pos |
| <=0.12 | <=4 |     |       |          |         |
| <=0.12 | <=4 |     |       |          |         |
| 0.25   | 8   | Pos | CTX-M | CMY      | Pos/Pos |
| <=0.12 | <=4 | Pos | CTX-M | Neg      | Pos/Neg |
| <=0.25 | <=4 |     |       |          |         |
| <=0.25 | <=4 |     |       |          |         |
| <=0.25 | <=4 |     |       |          |         |
| <=0.25 | 64  | Neg | Neg   | CMY, DHA | Neg/Pos |
| <=0.25 | <=4 |     |       |          |         |
| <=0.25 | <=4 | Neg | Neg   | CMY      | Neg/Pos |
| <=0.25 | <=4 |     |       |          |         |
| <=0.25 | <=4 |     |       |          |         |
| <=0.25 | <=4 |     |       |          |         |
| <=0.25 | 8   | Pos | CTX-M | Neg      | Pos/Neg |
| <=0.25 | 16  | Pos | CTX-M | Neg      | Pos/Neg |
| <=0.25 | <=4 |     |       |          |         |
| <=0.25 | <=4 |     |       |          |         |
| <=0.25 | <=4 |     |       |          |         |
| <=0.25 | <=4 |     |       |          |         |
| <=0.25 | <=4 |     |       |          |         |
| <=0.25 | <=4 |     |       |          |         |
| <=0.25 | <=4 |     |       |          |         |
| <=0.25 | <=4 |     |       |          |         |
| <=0.25 | <=4 |     |       |          |         |
| <=0.25 | <=4 |     |       |          |         |
| <=0.25 | <=4 |     |       |          |         |
| <=0.25 | <=4 |     |       |          |         |
| <=0.25 | <=4 |     |       |          |         |
| <=0.25 | <=4 |     |       |          |         |
| <=0.25 | <=4 |     |       |          |         |
| <=0.25 | <=4 |     |       |          |         |
| <=0.25 | <=4 |     |       |          |         |
| <=0.25 | <=4 |     |       |          |         |
| <=0.25 | <=4 |     |       |          |         |
| <=0.25 | <=4 |     |       |          |         |
| <=0.25 | <=4 |     |       |          |         |
| <=0.25 | <=4 |     |       |          |         |
| <=0.25 | <=4 |     |       |          |         |
| 0.5    | 8   |     |       |          |         |
| <=0.25 | <=4 |     |       |          |         |
| <=0.25 | <=4 |     |       |          |         |
| <=0.25 | <=4 |     |       |          |         |
| <=0.25 | <=4 |     |       |          |         |
| <=0.25 | <=4 |     |       |          |         |
| 0.25   | 8   | Pos | CTX-M | CMY      | Pos/Pos |

|        |     |     |       |          |         |
|--------|-----|-----|-------|----------|---------|
| <=0.25 | <=4 |     |       |          |         |
| <=0.25 | <=4 |     |       |          |         |
| <=0.25 | <=4 |     |       |          |         |
| <=0.25 | <=4 |     |       |          |         |
| <=0.25 | <=4 |     |       |          |         |
| <=0.25 | <=4 |     |       |          |         |
| <=0.25 | <=4 |     |       |          |         |
| <=0.12 | <=4 |     |       |          |         |
| <=0.12 | <=4 |     |       |          |         |
| 0.25   | <=4 |     |       |          |         |
| <=0.12 | <=4 |     |       |          |         |
| <=0.12 | <=4 |     |       |          |         |
| <=0.12 | <=4 | Neg | Neg   | DHA      | Neg/Pos |
| <=0.25 | <=4 |     |       |          |         |
| <=0.25 | <=4 |     |       |          |         |
| <=0.25 | <=4 |     |       |          |         |
| <=0.25 | <=4 |     |       |          |         |
| <=0.25 | <=4 |     |       |          |         |
| <=0.25 | <=4 |     |       |          |         |
| <=0.12 | <=4 |     |       |          |         |
| <=0.25 | <=4 |     |       |          |         |
| <=0.25 | <=4 | Neg | Neg   | Neg      | Neg/Neg |
| <=0.25 | <=4 |     |       |          |         |
| <=0.25 | <=4 |     |       |          |         |
| <=0.25 | <=4 |     |       |          |         |
| 0.25   | <=4 |     |       |          |         |
| <=0.25 | <=4 |     |       |          |         |
| <=0.25 | <=4 | Neg | Neg   | CMY      | Neg/Pos |
| <=0.25 | <=4 |     |       |          |         |
| <=0.25 | 16  | Pos | CTX-M | Neg      | Pos/Neg |
| <=0.25 | <=4 |     |       |          |         |
| <=0.25 | <=4 | Pos | CTX-M | Neg      | Pos/Neg |
| <=0.12 | <=4 |     |       |          |         |
| <=0.12 | <=4 | Neg | Neg   | Neg      | Neg/Neg |
| <=0.12 | <=4 |     |       |          |         |
| <=0.12 | <=4 |     |       |          |         |
| <=0.12 | <=4 |     |       |          |         |
| <=0.12 | <=4 |     |       |          |         |
| <=0.12 | <=4 |     |       |          |         |
| <=0.12 | <=4 |     |       |          |         |
| <=0.12 | <=4 |     |       |          |         |
| <=0.12 | 64  | Neg | SHV   | CMY, DHA | Pos/Pos |
| <=0.12 | <=4 |     |       |          |         |
| 0.25   | <=4 | Neg | Neg   | CMY      | Neg/Pos |
| <=0.12 | <=4 |     |       |          |         |
| <=0.12 | <=4 |     |       |          |         |
| <=0.12 | <=4 | Neg | Neg   | CMY      | Neg/Pos |
| <=0.12 | <=4 |     |       |          |         |
| <=0.25 | <=4 | Neg | Neg   | CMY      | Neg/Pos |
| <=0.25 | <=4 |     |       |          |         |
| <=0.25 | <=4 |     |       |          |         |
| <=0.12 | <=4 |     |       |          |         |
| <=0.12 | <=4 |     |       |          |         |
| <=0.12 | <=4 |     |       |          |         |
| <=0.12 | <=4 |     |       |          |         |
| <=0.12 | <=4 |     |       |          |         |
| <=0.12 | <=4 |     |       |          |         |
| 0.25   | <=4 |     |       |          |         |
| <=0.12 | <=4 |     |       |          |         |
| <=0.12 | <=4 |     |       |          |         |
| <=0.12 | <=4 |     |       |          |         |

|        |     |     |            |          |         |
|--------|-----|-----|------------|----------|---------|
| <=0.25 | <=4 |     |            |          |         |
| <=0.12 | <=4 |     |            |          |         |
| <=0.12 | <=4 |     |            |          |         |
| <=0.12 | <=4 |     |            |          |         |
| <=0.12 | <=4 |     |            |          |         |
| <=0.12 | <=4 |     |            |          |         |
| <=0.12 | <=4 |     |            |          |         |
| <=0.12 | <=4 |     |            |          |         |
| <=0.12 | <=4 |     |            |          |         |
| <=0.12 | <=4 |     |            |          |         |
| <=0.12 | <=4 |     |            |          |         |
| <=0.25 | <=4 |     |            |          |         |
| <=0.25 | <=4 |     |            |          |         |
| <=0.25 | <=4 |     |            |          |         |
| <=0.25 | <=4 |     |            |          |         |
| <=0.25 | <=4 |     |            |          |         |
| <=0.25 | <=4 |     |            |          |         |
| <=0.25 | <=4 |     |            |          |         |
| <=0.25 | <=4 |     |            |          |         |
| <=0.12 | <=4 |     |            |          |         |
| <=0.12 | <=4 |     |            |          |         |
| <=0.12 | <=4 |     |            |          |         |
| <=0.25 | <=4 |     |            |          |         |
| <=0.25 | <=4 |     |            |          |         |
| <=0.25 | <=4 |     |            |          |         |
| <=0.25 | <=4 |     |            |          |         |
| <=0.25 | <=4 |     |            |          |         |
| <=0.25 | <=4 |     |            |          |         |
| <=0.25 | >64 | Neg | Neg        | Neg      | Neg/Neg |
| <=0.25 | <=4 |     |            |          |         |
| <=0.25 | >64 | Neg | CTX-M      | CMY      | Pos/Pos |
| <=0.25 | <=4 |     |            |          |         |
| <=0.25 | <=4 |     |            |          |         |
| <=0.25 | <=4 |     |            |          |         |
| <=0.12 | <=4 |     |            |          |         |
| <=0.12 | <=4 |     |            |          |         |
| <=0.12 | <=4 |     |            |          |         |
| <=0.12 | <=4 |     |            |          |         |
| <=0.12 | <=4 |     |            |          |         |
| <=0.12 | 32  |     |            |          |         |
| <=0.12 | <=4 |     |            |          |         |
| <=0.25 | <=4 |     |            |          |         |
| <=0.25 | <=4 |     |            |          |         |
| <=0.25 | <=4 |     |            |          |         |
| <=0.25 | <=4 |     |            |          |         |
| <=0.25 | <=4 |     |            |          |         |
| <=0.12 | <=4 |     |            |          |         |
| <=0.25 | <=4 | Pos | CTX-M      | Neg      | Pos/Neg |
| <=0.12 | <=4 |     |            |          |         |
| <=0.25 | 16  | Pos | CTX-M      | CMY      | Pos/Pos |
| <=0.12 | <=4 |     |            |          |         |
| <=0.12 | 16  | Neg | CTX-M      | CMY      | Pos/Pos |
| <=0.25 | <=4 |     |            |          |         |
| <=0.25 | <=4 |     |            |          |         |
| <=0.25 | <=4 |     |            |          |         |
| 0.5    | >64 | Pos | CTX-M, SHV | CMY, DHA | Pos/Pos |
| <=0.25 | <=4 |     |            |          |         |
| <=0.25 | <=4 |     |            |          |         |
| <=0.25 | <=4 |     |            |          |         |
| <=0.25 | <=4 |     |            |          |         |
| <=0.25 | <=4 |     |            |          |         |
| <=0.25 | <=4 |     |            |          |         |
| <=0.25 | <=4 |     |            |          |         |
| <=0.25 | <=4 |     |            |          |         |
| <=0.12 | <=4 |     |            |          |         |
| 0.25   | 16  | Neg | Neg        | CMY      | Neg/Pos |
| <=0.12 | <=4 |     |            |          |         |











|        |     |     |       |     |         |
|--------|-----|-----|-------|-----|---------|
| <=0.25 | <=4 |     |       |     |         |
| <=0.25 | <=4 |     |       |     |         |
| <=0.25 | <=4 |     |       |     |         |
| <=0.25 | <=4 |     |       |     |         |
| <=0.25 | <=4 |     |       |     |         |
| <=0.25 | <=4 |     |       |     |         |
| <=0.25 | <=4 |     |       |     |         |
| <=0.25 | <=4 |     |       |     |         |
| <=0.25 | <=4 |     |       |     |         |
| <=0.25 | <=4 |     |       |     |         |
| <=0.25 | <=4 | Pos | CTX-M | Neg | Pos/Neg |
| <=0.25 | <=4 |     |       |     |         |
| <=0.25 | <=4 |     |       |     |         |
| <=0.25 | <=4 |     |       |     |         |
| <=0.25 | <=4 |     |       |     |         |
| <=0.25 | <=4 |     |       |     |         |
| <=0.25 | >64 |     |       |     |         |
| <=0.25 | <=4 |     |       |     |         |
| <=0.25 | <=4 |     |       |     |         |
| <=0.25 | 16  | Pos | CTX-M | Neg | Pos/Neg |
| <=0.25 | <=4 |     |       |     |         |
| <=0.25 | <=4 | Neg | Neg   | CMY | Neg/Pos |
| <=0.25 | <=4 |     |       |     |         |
| <=0.25 | <=4 |     |       |     |         |
| <=0.25 | <=4 |     |       |     |         |
| <=0.25 | <=4 | Neg | Neg   | DHA | Neg/Pos |
| <=0.25 | <=4 |     |       |     |         |
| <=0.25 | <=4 |     |       |     |         |
| <=0.25 | <=4 |     |       |     |         |
| <=0.25 | <=4 |     |       |     |         |
| <=0.25 | <=4 |     |       |     |         |
| <=0.25 | >64 | Pos | CTX-M | Neg | Pos/Neg |
| <=0.25 | <=4 |     |       |     |         |
| <=0.25 | <=4 |     |       |     |         |
| <=0.25 | 32  | Neg | Neg   | CMY | Neg/Pos |
| <=0.25 | <=4 |     |       |     |         |
| <=0.25 | <=4 |     |       |     |         |
| <=0.25 | <=4 |     |       |     |         |
| <=0.25 | <=4 | Neg | Neg   | Neg | Neg/Neg |
| <=0.25 | <=4 |     |       |     |         |
| <=0.25 | 32  | Pos | CTX-M | CMY | Pos/Pos |
| <=0.25 | <=4 |     |       |     |         |
| <=0.25 | <=4 |     |       |     |         |
| <=0.25 | 64  | Pos | CTX-M | Neg | Pos/Neg |
| <=0.25 | <=4 |     |       |     |         |
| <=0.25 | <=4 |     |       |     |         |
| <=0.25 | <=4 |     |       |     |         |
| <=0.25 | <=4 |     |       |     |         |
| <=0.25 | <=4 |     |       |     |         |
| <=0.25 | <=4 | Neg | Neg   | Neg | Neg/Neg |
| <=0.25 | <=4 |     |       |     |         |
| <=0.25 | <=4 |     |       |     |         |
| <=0.25 | <=4 |     |       |     |         |
| 0.5    | 8   | Neg | Neg   | CMY | Neg/Pos |
| <=0.25 | <=4 |     |       |     |         |
| <=0.25 | <=4 |     |       |     |         |
| <=0.25 | <=4 |     |       |     |         |
| <=0.25 | <=4 | Neg | Neg   | CMY | Neg/Pos |
| <=0.25 | <=4 |     |       |     |         |



|        |     |     |       |     |         |
|--------|-----|-----|-------|-----|---------|
| <=0.25 | <=4 |     |       |     |         |
| <=0.25 | 8   |     |       |     |         |
| <=0.25 | <=4 |     |       |     |         |
| <=0.25 | <=4 |     |       |     |         |
| <=0.25 | <=4 | Pos | CTX-M | Neg | Pos/Neg |
| <=0.25 | <=4 |     |       |     |         |
| <=0.25 | <=4 |     |       |     |         |
| <=0.25 | <=4 | Pos | CTX-M | Neg | Pos/Neg |
| <=0.25 | <=4 |     |       |     |         |
| <=0.25 | <=4 |     |       |     |         |
| <=0.25 | <=4 |     |       |     |         |
| <=0.25 | <=4 |     |       |     |         |
| <=0.25 | >64 |     |       |     |         |
| <=0.25 | <=4 |     |       |     |         |
| <=0.25 | <=4 |     |       |     |         |
| <=0.25 | <=4 |     |       |     |         |
| <=0.25 | <=4 |     |       |     |         |
| <=0.25 | <=4 |     |       |     |         |
| <=0.25 | <=4 |     |       |     |         |
| <=0.25 | <=4 |     |       |     |         |
| <=0.25 | <=4 |     |       |     |         |
| <=0.25 | <=4 |     |       |     |         |
| <=0.25 | <=4 |     |       |     |         |
| <=0.25 | <=4 |     |       |     |         |
| <=0.25 | <=4 |     |       |     |         |
| <=0.25 | <=4 |     |       |     |         |
| <=0.25 | <=4 |     |       |     |         |
| <=0.25 | <=4 |     |       |     |         |
| <=0.25 | <=4 |     |       |     |         |
| <=0.25 | <=4 |     |       |     |         |
| <=0.25 | <=4 |     |       |     |         |
| <=0.25 | <=4 | Neg | Neg   | CMY | Neg/Pos |
| <=0.25 | <=4 |     |       |     |         |
| <=0.25 | <=4 |     |       |     |         |
| <=0.25 | <=4 |     |       |     |         |
| <=0.25 | <=4 |     |       |     |         |
| <=0.25 | <=4 | Neg | Neg   | CMY | Neg/Pos |
| <=0.25 | 8   | Neg | Neg   | CMY | Neg/Pos |
| <=0.25 | <=4 |     |       |     |         |
| <=0.25 | 8   | Neg | Neg   | CMY | Neg/Pos |
| <=0.25 | <=4 | Neg | Neg   | Neg | Neg/Neg |
| <=0.25 | <=4 |     |       |     |         |
| <=0.25 | 32  |     |       |     |         |
| <=0.25 | <=4 |     |       |     |         |
| <=0.25 | <=4 |     |       |     |         |
| <=0.25 | <=4 |     |       |     |         |
| <=0.25 | <=4 |     |       |     |         |
| <=0.25 | <=4 |     |       |     |         |
| <=0.25 | <=4 |     |       |     |         |
| <=0.25 | <=4 |     |       |     |         |
| <=0.25 | <=4 |     |       |     |         |
| <=0.25 | <=4 |     |       |     |         |
| <=0.25 | <=4 |     |       |     |         |
| <=0.25 | <=4 |     |       |     |         |
| <=0.25 | <=4 |     |       |     |         |
| <=0.25 | <=4 | Pos | CTX-M | Neg | Pos/Neg |
| <=0.25 | <=4 |     |       |     |         |
| <=0.25 | 8   | Neg | Neg   | CMY | Neg/Pos |
| <=0.25 | <=4 |     |       |     |         |
| <=0.25 | <=4 |     |       |     |         |
| <=0.25 | <=4 |     |       |     |         |
| <=0.25 | <=4 |     |       |     |         |
| <=0.25 | <=4 |     |       |     |         |
| <=0.25 | <=4 |     |       |     |         |
| <=0.25 | <=4 |     |       |     |         |
| <=0.25 | <=4 |     |       |     |         |
| <=0.25 | <=4 |     |       |     |         |
| <=0.25 | <=4 |     |       |     |         |
| <=0.25 | <=4 | Neg | Neg   | Neg | Neg/Neg |
| <=0.25 | <=4 |     |       |     |         |
| <=0.25 | <=4 |     |       |     |         |
| <=0.25 | <=4 |     |       |     |         |

|        |     |     |       |     |         |
|--------|-----|-----|-------|-----|---------|
| <=0.25 | <=4 |     |       |     |         |
| <=0.25 | <=4 |     |       |     |         |
| <=0.25 | <=4 |     |       |     |         |
| <=0.25 | <=4 |     |       |     |         |
| <=0.25 | <=4 |     |       |     |         |
| <=0.25 | <=4 |     |       |     |         |
| <=0.25 | <=4 |     |       |     |         |
| <=0.25 | <=4 |     |       |     |         |
| <=0.25 | <=4 |     |       |     |         |
| <=0.25 | 32  | Pos | CTX-M | CMY | Pos/Pos |
| <=0.25 | <=4 | Pos | CTX-M | Neg | Pos/Neg |
| <=0.25 | <=4 |     |       |     |         |
| <=0.25 | <=4 |     |       |     |         |
| <=0.25 | <=4 |     |       |     |         |
| <=0.25 | <=4 |     |       |     |         |
| <=0.25 | <=4 |     |       |     |         |
| <=0.25 | <=4 |     |       |     |         |
| <=0.25 | <=4 |     |       |     |         |
| <=0.25 | <=4 | Pos | CTX-M | Neg | Pos/Neg |
| <=0.25 | <=4 |     |       |     |         |
| <=0.25 | <=4 |     |       |     |         |
| <=0.25 | <=4 | Pos | CTX-M | Neg | Pos/Neg |
| <=0.25 | <=4 |     |       |     |         |
| <=0.25 | <=4 |     |       |     |         |
| <=0.25 | <=4 |     |       |     |         |
| <=0.25 | 16  | Pos | CTX-M | Neg | Pos/Neg |
| <=0.25 | <=4 |     |       |     |         |
| <=0.25 | <=4 |     |       |     |         |
| <=0.25 | <=4 |     |       |     |         |
| <=0.25 | <=4 |     |       |     |         |
| <=0.25 | <=4 |     |       |     |         |
| <=0.25 | <=4 |     |       |     |         |
| <=0.25 | <=4 |     |       |     |         |
| <=0.25 | <=4 |     |       |     |         |
| <=0.25 | <=4 |     |       |     |         |
| <=0.25 | <=4 |     |       |     |         |
| <=0.25 | <=4 | Neg | Neg   | CMY | Neg/Pos |
| <=0.25 | <=4 |     |       |     |         |
| <=0.25 | 32  |     |       |     |         |
| <=0.25 | <=4 |     |       |     |         |
| <=0.25 | <=4 |     |       |     |         |
| <=0.25 | <=4 |     |       |     |         |
| <=0.25 | 16  | Neg | Neg   | CMY | Neg/Pos |
| <=0.25 | <=4 |     |       |     |         |
| <=0.25 | <=4 |     |       |     |         |
| <=0.25 | <=4 |     |       |     |         |
| <=0.25 | <=4 | Neg | Neg   | Neg | Neg/Neg |
| <=0.25 | <=4 | Neg | Neg   | CMY | Neg/Pos |
| <=0.25 | <=4 |     |       |     |         |
| <=0.25 | <=4 |     |       |     |         |
| <=0.25 | <=4 |     |       |     |         |
| <=0.25 | <=4 |     |       |     |         |
| <=0.25 | 8   | Neg | Neg   | CMY | Neg/Pos |
| <=0.25 | <=4 |     |       |     |         |
| <=0.25 | <=4 | Neg | Neg   | DHA | Neg/Pos |
| <=0.25 | 8   |     |       |     |         |
| <=0.25 | <=4 |     |       |     |         |
| <=0.25 | 8   |     |       |     |         |
| 0.5    | <=4 | Pos | CTX-M | Neg | Pos/Neg |
| <=0.25 | <=4 |     |       |     |         |
| <=0.25 | <=4 | Pos | CTX-M | Neg | Pos/Neg |
| <=0.25 | <=4 |     |       |     |         |



|        |     |     |       |     |         |
|--------|-----|-----|-------|-----|---------|
| <=0.25 | 16  | Neg | Neg   | CMY | Neg/Pos |
| <=0.25 | <=4 |     |       |     |         |
| <=0.25 | <=4 |     |       |     |         |
| <=0.25 | <=4 |     |       |     |         |
| <=0.25 | <=4 |     |       |     |         |
| <=0.25 | <=4 |     |       |     |         |
| <=0.25 | >64 |     |       |     |         |
| <=0.25 | <=4 |     |       |     |         |
| <=0.25 | <=4 |     |       |     |         |
| <=0.25 | <=4 | Pos | CTX-M | Neg | Pos/Neg |
| <=0.25 | <=4 | Pos | CTX-M | Neg | Pos/Neg |
| <=0.25 | 8   | Neg | Neg   | CMY | Neg/Pos |
| <=0.25 | <=4 |     |       |     |         |
| <=0.25 | <=4 | Neg | Neg   | Neg | Neg/Neg |
| <=0.25 | <=4 | Pos | CTX-M | Neg | Pos/Neg |
| <=0.25 | <=4 | Pos | CTX-M | Neg | Pos/Neg |
| <=0.25 | <=4 |     |       |     |         |
| <=0.25 | <=4 |     |       |     |         |
| <=0.25 | <=4 |     |       |     |         |
| <=0.25 | >64 |     |       |     |         |
| <=0.25 | <=4 | Pos | CTX-M | Neg | Pos/Neg |
| <=0.25 | <=4 | Pos | CTX-M | Neg | Pos/Neg |
| <=0.25 | <=4 | Pos | CTX-M | Neg | Pos/Neg |
| <=0.25 | <=4 |     |       |     |         |
| <=0.25 | <=4 |     |       |     |         |
| <=0.25 | <=4 |     |       |     |         |
| <=0.25 | <=4 |     |       |     |         |
| <=0.25 | <=4 |     |       |     |         |
| <=0.25 | 8   | Neg | Neg   | CMY | Neg/Pos |
| <=0.25 | <=4 |     |       |     |         |
| <=0.25 | <=4 |     |       |     |         |
| <=0.25 | <=4 |     |       |     |         |
| <=0.25 | <=4 | Pos | CTX-M | Neg | Pos/Neg |
| <=0.25 | <=4 | Pos | CTX-M | Neg | Pos/Neg |
| <=0.25 | <=4 |     |       |     |         |
| <=0.25 | <=4 | Pos | CTX-M | Neg | Pos/Neg |
| <=0.25 | <=4 |     |       |     |         |
| <=0.25 | <=4 |     |       |     |         |
| <=0.25 | <=4 |     |       |     |         |
| <=0.25 | <=4 |     |       |     |         |
| <=0.25 | <=4 |     |       |     |         |
| <=0.25 | <=4 | Neg | Neg   | Neg | Neg/Neg |
| <=0.25 | <=4 |     |       |     |         |
| <=0.25 | <=4 | Pos | CTX-M | Neg | Pos/Neg |
| <=0.25 | <=4 |     |       |     |         |
| <=0.25 | <=4 |     |       |     |         |
| <=0.25 | <=4 |     |       |     |         |
| <=0.25 | <=4 |     |       |     |         |
| <=0.25 | <=4 |     |       |     |         |
| <=0.25 | 32  | Neg | Neg   | CMY | Neg/Pos |
| <=0.25 | <=4 |     |       |     |         |
| <=0.25 | <=4 |     |       |     |         |
| <=0.25 | <=4 |     |       |     |         |
| <=0.25 | <=4 |     |       |     |         |
| <=0.25 | <=4 |     |       |     |         |
| <=0.25 | <=4 |     |       |     |         |
| <=0.25 | <=4 |     |       |     |         |
| <=0.25 | 16  | Pos | CTX-M | Neg | Pos/Neg |
| <=0.25 | <=4 |     |       |     |         |
| <=0.25 | <=4 |     |       |     |         |
| <=0.25 | <=4 |     |       |     |         |

|        |     |     |       |     |         |
|--------|-----|-----|-------|-----|---------|
| <=0.25 | <=4 |     |       |     |         |
| <=0.25 | <=4 |     |       |     |         |
| <=0.25 | <=4 |     |       |     |         |
| <=0.25 | <=4 |     |       |     |         |
| <=0.25 | <=4 |     |       |     |         |
| <=0.25 | <=4 |     |       |     |         |
| <=0.25 | <=4 |     |       |     |         |
| <=0.25 | <=4 |     |       |     |         |
| <=0.25 | <=4 |     |       |     |         |
| <=0.25 | <=4 |     |       |     |         |
| <=0.25 | <=4 |     |       |     |         |
| <=0.25 | <=4 |     |       |     |         |
| <=0.25 | <=4 | Pos | CTX-M | Neg | Pos/Neg |
| <=0.25 | <=4 |     |       |     |         |
| <=0.25 | <=4 |     |       |     |         |
| <=0.25 | <=4 |     |       |     |         |
| <=0.25 | <=4 | Pos | CTX-M | Neg | Pos/Neg |
| <=0.25 | <=4 |     |       |     |         |
| <=0.25 | <=4 |     |       |     |         |
| <=0.25 | <=4 |     |       |     |         |
| <=0.25 | <=4 |     |       |     |         |
| <=0.25 | <=4 |     |       |     |         |
| <=0.25 | <=4 |     |       |     |         |
| <=0.25 | <=4 |     |       |     |         |
| <=0.25 | <=4 |     |       |     |         |
| <=0.25 | <=4 |     |       |     |         |
| <=0.25 | <=4 | Pos | CTX-M | Neg | Pos/Neg |
| <=0.25 | <=4 | Pos | CTX-M | Neg | Pos/Neg |
| <=0.25 | <=4 |     |       |     |         |
| <=0.25 | <=4 |     |       |     |         |
| <=0.25 | <=4 |     |       |     |         |
| <=0.25 | 8   |     |       |     |         |
| <=0.25 | <=4 |     |       |     |         |
| <=0.25 | <=4 |     |       |     |         |
| <=0.25 | <=4 |     |       |     |         |
| <=0.25 | <=4 |     |       |     |         |
| <=0.25 | <=4 |     |       |     |         |
| <=0.25 | <=4 |     |       |     |         |
| <=0.25 | <=4 |     |       |     |         |
| <=0.25 | <=4 |     |       |     |         |
| <=0.25 | <=4 |     |       |     |         |
| <=0.25 | <=4 |     |       |     |         |
| <=0.25 | <=4 | Neg | Neg   | CMY | Neg/Pos |
| <=0.25 | <=4 |     |       |     |         |
| <=0.25 | 32  | Neg | Neg   | CMY | Neg/Pos |
| 0.5    | <=4 | Pos | CTX-M | Neg | Pos/Neg |
| <=0.25 | <=4 |     |       |     |         |
| <=0.25 | <=4 | Pos | CTX-M | Neg | Pos/Neg |
| <=0.25 | <=4 |     |       |     |         |
| <=0.25 | <=4 |     |       |     |         |
| <=0.25 | <=4 |     |       |     |         |
| <=0.25 | <=4 |     |       |     |         |
| <=0.25 | <=4 |     |       |     |         |
| <=0.25 | <=4 |     |       |     |         |
| <=0.25 | <=4 |     |       |     |         |
| <=0.25 | <=4 |     |       |     |         |
| <=0.25 | <=4 |     |       |     |         |
| <=0.25 | <=4 |     |       |     |         |
| <=0.25 | <=4 |     |       |     |         |
| <=0.25 | <=4 | Pos | CTX-M | Neg | Pos/Neg |
| <=0.25 | <=4 |     |       |     |         |
| <=0.25 | <=4 |     |       |     |         |



|        |     |     |       |     |         |
|--------|-----|-----|-------|-----|---------|
| <=0.25 | <=4 | Pos | CTX-M | Neg | Pos/Neg |
| 0.5    | 8   | Pos | CTX-M | CMY | Pos/Pos |
| <=0.25 | <=4 |     |       |     |         |
| <=0.25 | <=4 |     |       |     |         |
| <=0.25 | <=4 |     |       |     |         |
| <=0.25 | <=4 |     |       |     |         |
| <=0.25 | <=4 |     |       |     |         |
| <=0.25 | <=4 |     |       |     |         |
| <=0.25 | <=4 |     |       |     |         |
| <=0.25 | <=4 |     |       |     |         |
| <=0.25 | <=4 |     |       |     |         |
| <=0.25 | <=4 |     |       |     |         |
| <=0.25 | <=4 |     |       |     |         |
| <=0.25 | <=4 |     |       |     |         |
| <=0.25 | >64 | Neg | Neg   | CMY | Neg/Pos |
| <=0.25 | <=4 |     |       |     |         |
| <=0.25 | <=4 | Pos | CTX-M | Neg | Pos/Neg |
| <=0.25 | 8   | Neg | Neg   | CMY | Neg/Pos |
| <=0.25 | <=4 |     |       |     |         |
| <=0.25 | 8   | Pos | CTX-M | Neg | Pos/Neg |
| <=0.25 | <=4 |     |       |     |         |
| <=0.25 | <=4 |     |       |     |         |
| <=0.25 | <=4 |     |       |     |         |
| <=0.25 | <=4 |     |       |     |         |
| <=0.25 | 8   |     |       |     |         |
| <=0.25 | <=4 |     |       |     |         |
| <=0.25 | <=4 |     |       |     |         |
| <=0.25 | <=4 |     |       |     |         |
| <=0.25 | <=4 |     |       |     |         |
| <=0.25 | <=4 | Neg | Neg   | CMY | Neg/Pos |
| <=0.25 | <=4 |     |       |     |         |
| <=0.25 | <=4 |     |       |     |         |
| <=0.25 | <=4 |     |       |     |         |
| <=0.25 | <=4 |     |       |     |         |
| <=0.25 | 8   | Neg | Neg   | CMY | Neg/Pos |
| <=0.25 | <=4 |     |       |     |         |
| <=0.25 | <=4 |     |       |     |         |
| <=0.25 | <=4 |     |       |     |         |
| <=0.25 | <=4 |     |       |     |         |
| <=0.25 | 16  | Neg | Neg   | CMY | Neg/Pos |
| <=0.25 | <=4 |     |       |     |         |
| <=0.25 | <=4 |     |       |     |         |
| <=0.25 | <=4 |     |       |     |         |
| <=0.25 | <=4 |     |       |     |         |
| <=0.25 | <=4 |     |       |     |         |
| <=0.25 | 16  | Pos | CTX-M | CMY | Pos/Pos |
| <=0.25 | <=4 |     |       |     |         |
| <=0.25 | <=4 |     |       |     |         |
| <=0.25 | <=4 |     |       |     |         |
| <=0.25 | <=4 |     |       |     |         |
| <=0.25 | <=4 |     |       |     |         |
| <=0.25 | <=4 |     |       |     |         |
| <=0.25 | <=4 | Pos | CTX-M | Neg | Pos/Neg |
| <=0.25 | <=4 | Neg | Neg   | Neg | Neg/Neg |
| <=0.25 | <=4 |     |       |     |         |
| <=0.25 | <=4 |     |       |     |         |
| <=0.25 | <=4 |     |       |     |         |
| <=0.25 | <=4 |     |       |     |         |
| <=0.25 | <=4 |     |       |     |         |
| <=0.25 | <=4 |     |       |     |         |
| <=0.25 | <=4 |     |       |     |         |
| <=0.25 | <=4 |     |       |     |         |
| <=0.25 | <=4 | Pos | CTX-M | Neg | Pos/Neg |
| <=0.25 | <=4 |     |       |     |         |
| <=0.25 | <=4 |     |       |     |         |



|        |     |     |       |     |         |
|--------|-----|-----|-------|-----|---------|
| <=0.25 | 8   | Neg | Neg   | CMY | Neg/Pos |
| <=0.25 | <=4 |     |       |     |         |
| <=0.25 | <=4 |     |       |     |         |
| <=0.25 | <=4 |     |       |     |         |
| 0.5    | <=4 |     |       |     |         |
| <=0.25 | <=4 | Neg | Neg   | CMY | Neg/Pos |
| <=0.25 | <=4 | Pos | CTX-M | Neg | Pos/Neg |
| <=0.25 | <=4 |     |       |     |         |
| <=0.25 | <=4 |     |       |     |         |
| <=0.25 | <=4 |     |       |     |         |
